# Supplementary material for: Multi-omics and molecular testing: A new insight into the genetic mechanisms of sarcopenia and arthritis
Source: Research Square preprint supplement (doi:10.21203/rs.3.rs-7589916/v1), 2025-10-10
Supplement: Supplementary file 1 [file de99d2051e3d6c6af61911b2.xlsx]

## Sheet: Table S1
Table S1. The locus gene IFT172 of rs1260326 was shown to be in the 1 MB range between GA and ALM by colocalization
snp	V.df1	z.df1	r.df1	lABF.df1	V.df2	z.df2	r.df2	lABF.df2	internal.sum.lABF	SNP.PP.H4
rs1260326	1.0112916969e-08	-6.91031	0.99999974717714	16.2809317832828	8.1832612096e-06	10.9158090497231	0.999550714536629	55.6967502774719	71.9776820607548	0.942381
rs4665972	1.0234357225e-08	-7.4264	0.999999744141135	19.9863994098946	8.2793156644e-06	10.3011420111351	0.999545443257571	49.184552154111	69.1709515640056	0.0569218
rs780093	1.0214538489e-08	-6.42987	0.999999744636603	13.0813406321413	8.2606232569e-06	10.506588080567	0.999546469055676	51.3199407431324	64.4012813752737	0.000482878
rs780094	1.0213527844e-08	-6.56633	0.999999744661869	13.9679719983319	8.2598185201e-06	10.3435293790166	0.999546513217904	49.6207688316891	63.588740830021	0.000214267
rs6547692	9.80551491984e-09	-5.87831	0.999999754862187	9.66655424208816	7.9328412409e-06	8.46264730004651	0.9995644573521	31.9231447454557	41.5896989875439	5.98264e-14
rs2950835	9.92561883076e-09	-5.2584	0.999999751859591	6.22076107711249	8.0258323401e-06	8.51277272422423	0.99955935404277	32.3540491043695	38.574810181482	2.93456e-15
rs2911711	9.92583801225e-09	-5.25854	0.999999751854111	6.2214696557323	8.0260023204e-06	8.51204721463315	0.999559344714376	32.3478862375021	38.5693558932344	2.9186e-15
rs1313566	9.86021196196e-09	-5.40658	0.999999753494762	7.00761828862977	7.9725475449e-06	8.3813399349051	0.999562278281778	31.2410916662686	38.2487099548984	2.11797e-15
rs1260333	9.82846200996e-09	-5.46681	0.99999975428851	7.33345429206485	7.9466482404e-06	8.33574555335618	0.999563699626938	30.8585790635446	38.1920333556095	2.00127e-15
rs1260334	9.82921547776e-09	-5.42659	0.999999754269673	7.11441176649154	7.9470429025e-06	8.36097266809741	0.999563677967984	31.0691162531763	38.1835280196678	1.98432e-15
rs780095	9.84375512649e-09	-5.55064	0.999999753906182	7.79604244218107	7.95916944e-06	8.2402169289664	0.999563012467191	30.0679485885765	37.8639910307576	1.44158e-15
rs780096	9.84345748164e-09	-5.53787	0.999999753913624	7.72518759962343	7.9600722496e-06	8.23705588794057	0.999562962921303	30.0419723074554	37.7671599070788	1.30854e-15
rs6753534	9.98304719104e-09	-5.43174	0.999999750423882	7.15012397073775	8.0680993936e-06	8.26224106124403	0.999557034463278	30.2561849453281	37.4063089160659	9.12158e-16
rs1260338	9.829929316e-09	-5.09252	0.999999754251828	5.35739815186085	7.9650950625e-06	4.84645229869785	0.999562687271103	7.87148312322847	13.2288812750893	2.88368e-26
rs1728911	9.80430687889e-09	-5.04385	0.999999754892388	5.10940457421944	7.9425330625e-06	4.87845294065466	0.999563925466895	8.0256137212299	13.1350182954493	2.62532e-26
rs780110	9.80333653924e-09	-4.97266	0.999999754916647	4.75283610122076	7.9419130596e-06	4.92349563896755	0.999563959492512	8.24623196014619	12.9990680613669	2.29161e-26
rs2580757	9.91129758025e-09	-4.93791	0.999999752217622	4.58611216091731	8.01173025e-06	4.95541423776718	0.999560127955724	8.40815101541843	12.9942631763357	2.28062e-26
rs4665978	9.80448510976e-09	-5.08667	0.999999754887932	5.32633494632849	7.9430403556e-06	4.80449484448292	0.999563897626768	7.66773527197374	12.9940702183022	2.28018e-26
rs1083864	9.83800145689e-09	-5.08447	0.999999754050024	5.31685579973717	7.9711358224e-06	4.76959749514756	0.999562355756532	7.50250003164926	12.8193558313864	1.91466e-26
rs780108	9.80244545329e-09	-4.98496	0.999999754938924	4.8140092118202	7.94168761e-06	4.86313473616976	0.999563971865135	7.95098178745715	12.7649909992774	1.81335e-26
rs780105	9.80333653924e-09	-4.98389	0.999999754916647	4.8087470208829	7.9420821489e-06	4.84037513705703	0.99956395021293	7.84063051272028	12.6493775336032	1.61537e-26
rs2303370	9.82521053284e-09	-4.96777	0.999999754369797	4.72963241075671	7.9598465424e-06	4.7802447081508	0.999562975308038	7.5526161356535	12.2822485464102	1.119e-26
rs7586601	9.83456989636e-09	-4.82348	0.999999754135813	4.02375212920084	7.9700629969e-06	4.60099251539957	0.999562414632765	6.71281503910726	10.7365671683081	2.38533e-27
rs35784342	9.719199396e-09	4.94657456433976	0.999999757020074	4.61915348424519	7.8621916816e-06	-4.39849	0.999568334602692	5.79526722790091	10.4144207121461	1.72839e-27
rs6720602	9.74473019716e-09	4.87985663837659	0.999999756381805	4.29266570006082	7.8807087076e-06	-4.3971	0.999567318384668	5.79030255379992	10.0829682538607	1.24078e-27
rs34730887	9.74309159041e-09	4.86612411873108	0.99999975642277	4.22566319719388	7.8798665521e-06	-4.36203	0.999567364602283	5.63673236109799	9.86239555829187	9.95177e-28
rs2384574	1.0608588004e-08	-4.14438	0.99999973478537	1.01658329259563	8.5861892484e-06	4.77226965893346	0.999528603012981	7.55200594032776	8.56858923292339	2.72902e-28
rs2384573	1.0617447681e-08	-4.17103	0.999999734563879	1.12779337224035	8.5929300769e-06	4.74604024739286	0.999528233104158	7.42762298476874	8.55541635700909	2.69331e-28
rs9798063	1.0673989225e-08	-4.00184	0.99999973315034	0.439065492978703	8.6404250916e-06	4.63166704088506	0.999525626781708	6.89432349826403	7.33338899124273	7.93536e-29
rs28489942	1.0659117049e-08	-4.01911	0.999999733522145	0.507634120649953	8.6292587536e-06	4.61515679679734	0.999526239541164	6.81738629570474	7.32502041635469	7.86923e-29
rs62128740	1.0668204369e-08	-3.99493	0.999999733294962	0.411156512792724	8.6357225956e-06	4.63262167110179	0.999525884833889	6.89847408782929	7.30963060062202	7.74905e-29
rs7599739	1.0682876164e-08	-3.98671	0.999999732928167	0.379037745106233	8.6481870084e-06	4.62241310128605	0.999525200842338	6.85196965854567	7.23100740365191	7.16313e-29
rs11121	9.72032330889e-09	4.21119627717141	0.999999756991976	1.25199920026074	7.8666786576e-06	-4.32675	0.999568088356378	5.48270236433566	6.7347015645964	4.36074e-29
rs1659677	9.70240760064e-09	4.32574151682017	0.999999757439869	1.74000946898153	7.8499151329e-06	-4.14124	0.999569008343235	4.69652478347628	6.43653425245781	3.23644e-29
rs2439076	9.70274250625e-09	4.32525062815665	0.999999757431496	1.73790339102156	7.8503073856e-06	-4.13671	0.999568986816279	4.6778117131875	6.41571510420906	3.16976e-29
rs3739095	9.84881577744e-09	-4.38766	0.999999753779666	2.01727400724061	7.9809640036e-06	4.06260398009246	0.999561816390212	4.38232322632412	6.39959723356473	3.11908e-29
rs7574004	9.70571750976e-09	4.32375534929799	0.999999757357121	1.73159033760935	7.8526050625e-06	-4.13404	0.999568860719043	4.66689949254774	6.39848983015709	3.11563e-29
rs1275513	9.70668300625e-09	4.2553832880814	0.999999757332984	1.43835344870409	7.85288529e-06	-4.13792	0.999568845340071	4.68298793262328	6.12134138132738	2.36146e-29
rs1659711	9.69982705129e-09	4.26061325424393	0.999999757504382	1.46026935062941	7.8480660736e-06	-4.13073	0.999569109820223	4.65297181078091	6.11324116141032	2.34241e-29
rs1260327	9.73819633329e-09	-4.34339	0.999999756545151	1.81836142552928	7.8990226704e-06	4.01232	0.999566313312825	4.17426289068023	5.99262431620951	2.07625e-29
rs13472	1.0194133156e-08	-4.78453	0.999999745146736	3.85457862170833	8.2532671225e-06	3.25936265381068	0.999546872744688	1.45964679074723	5.31422541245556	1.05355e-29
rs12476704	1.0197566289e-08	-4.75988	0.999999745060908	3.73710712139468	8.2560827556e-06	3.27170818629191	0.999546718228693	1.50011294014232	5.23722	9.75466e-30
rs11897554	1.01989801e-08	-4.76064	0.999999745025563	3.74079086052613	8.2573470736e-06	3.2677236598505	0.999546648845608	1.48716673394056	5.22795759446669	9.66473e-30
rs34341829	1.0194738961e-08	-4.75537	0.999999745131591	3.71551199156722	8.2537842436e-06	3.27273106991444	0.999546844366171	1.50332004093739	5.21883203250461	9.57693e-30
rs4665975	1.0210294116e-08	-4.74413	0.999999744742712	3.66286804037674	8.26677504e-06	3.24764885920979	0.999546131459152	1.42236655025265	5.0852345906294	8.37926e-30
rs11675563	1.0210294116e-08	-4.74358	0.999999744742712	3.66028593006035	8.26677504e-06	3.22676335559265	0.999546131459152	1.35478655674772	5.01507248680806	7.8115e-30
rs7602534	1.01909025e-08	-4.67421	0.999999745227503	3.33264622268838	8.2501647361e-06	3.26484954618408	0.999547042997154	1.47735051360776	4.80999673629614	6.36314e-30
rs2010087	1.0209485764e-08	-4.67998	0.999999744762921	3.36058844864876	8.2656825001e-06	3.23317831937976	0.999546191415358	1.37543155730405	4.73602000595281	5.9094e-30
rs11690265	1.0209485764e-08	-4.67768	0.999999744762921	3.34979919785482	8.2664300196e-06	3.22315782883616	0.999546150393118	1.34314339197278	4.69294258982759	5.66025e-30
rs12471703	1.0197566289e-08	-4.40127	0.999999745060908	2.09444620655005	8.2586689641e-06	3.5891627432763	0.999546576303077	2.58878229844799	4.68322850499804	5.60553e-30
rs11127044	1.0192719681e-08	-4.39088	0.999999745182073	2.04855920493706	8.2547610721e-06	3.58329475724911	0.999546790759885	2.56751273483711	4.61607193977417	5.24144e-30
rs8179225	1.0200798001e-08	-4.41442	0.999999744980115	2.15258708205135	8.2611980929e-06	3.54648027471705	0.999546437509913	2.43672007191245	4.58930715396379	5.10302e-30
rs3845686	1.01868649e-08	-4.68089	0.999999745328442	3.36370668019949	8.2480968025e-06	3.18512160727032	0.99954715648105	1.22022081541004	4.58392749560953	5.07564e-30
rs8179229	1.0201e-08	-4.40385	0.999999744975065	2.10599922264477	8.2607957056e-06	3.55770033679405	0.999546459592062	2.47653246521137	4.58253168785614	5.06856e-30
rs72819512	1.0322763201e-08	-4.41638	0.999999741930987	2.1672005658308	8.3546433936e-06	3.53046594982079	0.999541309459237	2.38566891923129	4.5528694850621	4.92042e-30
rs13388159	1.01929216e-08	-4.6764	0.999999745177025	3.34299138544502	8.2529223841e-06	3.17271711472123	0.999546891663206	1.18109676692791	4.52408815237293	4.78083e-30
rs4425043	1.0204232256e-08	-4.41198	0.999999744894259	2.14200613188913	8.2624053136e-06	3.52767843475599	0.999546371260243	2.37031925050876	4.51232538239789	4.72492e-30
rs35073769	1.0199182081e-08	-4.39955	0.999999745020513	2.08697826638495	8.2584965376e-06	3.54250180947609	0.999546585765475	2.42246230246407	4.50944056884902	4.71131e-30
rs7588910	1.0085984041e-08	4.52577442770515	0.999999747850462	2.64469274151028	8.1670779961e-06	-3.37461	0.999551602644945	1.83653461140212	4.4812273529124	4.58024e-30
rs72819536	1.0188681721e-08	-4.65898	0.999999745283022	3.26149820862739	8.2493605089e-06	3.14285366116908	0.999547087131467	1.08662234064627	4.34812054927366	4.00942e-30
rs11127013	1.0187672356e-08	-4.66185	0.999999745308256	3.27480625407658	8.2482116809e-06	3.13599376038051	0.999547150176761	1.06502666480922	4.3398329188858	3.97633e-30
rs11126999	1.0189085481e-08	-4.68349	0.999999745272928	3.37599229760032	8.2492456225e-06	3.10205943282907	0.999547093436194	0.959294896602584	4.3352871942029	3.95829e-30
rs56076827	1.0186057476e-08	-4.66168	0.999999745348628	3.27395537901001	8.2468906276e-06	3.13062812093017	0.999547222673432	1.0481423653449	4.32209774435491	3.90643e-30
rs2288155	1.0241237601e-08	-4.66112	0.999999743969125	3.2740477540391	8.2956096441e-06	3.11118980907642	0.999544549081613	0.990435444838159	4.26448319887726	3.68772e-30
rs6716894	1.0191710116e-08	-4.53069	0.999999745207312	2.67215302956958	8.2540715401e-06	3.29575807782136	0.999546828599945	1.5789294063223	4.25108243589188	3.63863e-30
rs11904779	1.01868649e-08	-4.64929	0.999999745328442	3.21630781805278	8.2470054976e-06	3.12379864612642	0.999547216369604	1.02680174088783	4.2431095589406	3.60974e-30
rs11887784	1.01868649e-08	-4.65019	0.999999745328442	3.22050009438541	8.2469480625e-06	3.12031339775398	0.999547219521523	1.01592206175076	4.23642215613617	3.58568e-30
rs13391837	1.0185250084e-08	-4.59503	0.999999745368813	2.96544023856539	8.2462014244e-06	3.19792312353306	0.999547260495481	1.26094431213569	4.22638455070109	3.54987e-30
rs2280737	1.0172941321e-08	-4.47559	0.999999745676532	2.42309950352264	8.2402295364e-06	3.35250367521546	0.999547588220488	1.76663916651351	4.18973867003615	3.42213e-30
rs2293571	1.0210092025e-08	-4.49226	0.999999744747765	2.49967226367559	8.2670625625e-06	3.2923641422485	0.999546115680546	1.5685367486792	4.06820901235479	3.03052e-30
rs1898923	1.01364624e-08	4.44013706793802	0.999999746588504	2.26328049109883	8.2066206784e-06	-3.34297	0.99954943260993	1.73268992793562	3.99597041903444	2.81932e-30
rs11682763	1.0144316961e-08	4.42588786624172	0.99999974639214	2.20050090722321	8.2133254921e-06	-3.33443	0.999549064662116	1.70460040962057	3.90510131684377	2.57443e-30
rs7596471	1.1120335209e-08	4.49665727859805	0.999999721991697	2.56215310141451	8.9837473441e-06	-3.20944	0.999506787135043	1.34042494736468	3.90257804877919	2.56794e-30
rs2303369	1.0190296809e-08	-4.60507	0.999999745242645	3.01185494604831	8.2517158564e-06	3.07650961853108	0.999546957874914	0.880548991939557	3.89240393798786	2.54194e-30
rs2293572	1.0212315136e-08	-4.48881	0.999999744692187	2.48429893690618	8.2688453136e-06	3.22962831587586	0.999546017847076	1.36415556342688	3.84845450033306	2.43265e-30
rs7596856	1.0183433569e-08	-4.56322	0.999999745414226	2.81966177821731	8.2480393636e-06	3.10560805587861	0.999547159633177	0.970231477815097	3.7898932560324	2.29428e-30
rs3845687	1.0187672356e-08	-4.53489	0.999999745308256	2.69102364648743	8.2483265601e-06	3.12956173245729	0.999547143872429	1.04489260565303	3.73591625214046	2.17372e-30
rs4665955	1.0146734361e-08	-4.38265	0.999999746331705	2.01020120655503	8.2125230625e-06	3.33516880397802	0.999549108697958	1.7070256329477	3.71722683950273	2.13347e-30
rs113954968	1.0191508209e-08	-4.55387	0.99999974521236	2.77745293813513	8.2537842436e-06	3.07459953914805	0.999546844366171	0.874801821707179	3.65225475984231	1.99927e-30
rs10181100	1.01868649e-08	-4.4913	0.999999745328442	2.49424376017513	8.2506243121e-06	3.07646245809239	0.999547017776582	0.880338137858394	3.37458189803353	1.51453e-30
rs11695549	1.0304077081e-08	-4.1716	0.999999742398139	1.11519801358552	8.3421613584e-06	3.49356710568227	0.999541994439905	2.25539596248577	3.37059397607129	1.5085e-30
rs8395	1.0186663041e-08	-4.48926	0.999999745333489	2.48509087129327	8.2503370756e-06	3.06973408440505	0.999547033539522	0.859653225499734	3.34474	1.47001e-30
rs715326	1.0177783225e-08	-4.40081	0.999999745555484	2.09148269725338	8.2423539025e-06	3.0590954213762	0.999547471639594	0.826584942753611	2.91806764000699	9.59438e-31
rs12475426	1.0122170881e-08	-4.19514	0.999999746945792	1.2047731884715	8.19905956e-06	3.32639519452399	0.999549847550494	1.67699992008792	2.88177310855942	9.2524e-31
rs1528533	1.0152980644e-08	-4.24632	0.999999746175548	1.42231582875503	8.2221548049e-06	3.15117718653986	0.99954858012612	1.11116121572279	2.53347704447782	6.53118e-31
rs7594812	1.0155399076e-08	-4.23139	0.999999746115088	1.35913198148768	8.2247356944e-06	3.17052666080868	0.999548438491872	1.1724505693993	2.53158255088698	6.51882e-31
rs1271144	1.0156809961e-08	-4.23179	0.999999746079815	1.36089692645244	8.2259402481e-06	3.1681781255121	0.999548372388297	1.16508345188182	2.52598037833426	6.4824e-31
rs1104	1.0151973049e-08	-4.23296	0.999999746200738	1.36559707743836	8.2220401081e-06	3.15594212198465	0.99954858642046	1.12617400021534	2.4917710776537	6.26439e-31
rs111595594	1.0153585225e-08	-4.20629	0.999999746160434	1.2531616911038	8.2233591696e-06	3.16475568760374	0.999548514032898	1.15409517884583	2.40725686994963	5.75672e-31
rs1647284	1.0153182169e-08	-4.2052	0.99999974617051	1.24856777374349	8.2230150564e-06	3.16419419859254	0.999548532917169	1.15229834378235	2.40086611752584	5.72004e-31
rs809058	1.0158422521e-08	-4.20979	0.999999746039502	1.26813999062476	8.2274890896e-06	3.15439484583525	0.999548287390887	1.12162390431987	2.38976389494463	5.65689e-31
rs6547589	1.0149555025e-08	-4.20169	0.999999746261189	1.23360618358174	8.2199183616e-06	3.16205215134773	0.999548702857856	1.14533844820447	2.37894463178621	5.59602e-31
rs1083865	1.0161043204e-08	-4.20888	0.999999745973984	1.26443856975152	8.2295544384e-06	3.1434193647341	0.999548174048583	1.08720362814605	2.35164219789757	5.4453e-31
rs2911712	1.0165882276e-08	-4.20982	0.999999745853008	1.26860045161819	8.2333415844e-06	3.12766172483254	0.999547966217483	1.03804615429753	2.30664660591572	5.20571e-31
rs4582	1.0159632025e-08	-4.18879	0.999999746009264	1.17999092335534	8.22886596e-06	3.14763299170327	0.999548211830929	1.10041008823636	2.2804010115917	5.07086e-31
rs7563162	1.0167697225e-08	-4.21064	0.999999745807634	1.27215992367337	8.2347763369e-06	3.11285078564135	0.999547887481119	0.991939821079087	2.26409974475246	4.98887e-31
rs2950834	1.0166487241e-08	-4.20873	0.999999745837884	1.26405354402447	8.23403025e-06	3.11449032932567	0.999547928424883	0.996997427968346	2.26105097199282	4.97369e-31
rs11682083	1.0191710116e-08	-3.68828	0.999999745207312	-0.789691	8.2482116809e-06	3.71574215608102	0.999547150176761	3.05026869366953	2.26057774957815	4.97133e-31
rs1060525	1.0167697225e-08	-4.20868	0.999999745807634	1.26389382223704	8.2348911225e-06	3.11384315160385	0.999547881181914	0.995034939628331	2.25892876186537	4.96314e-31
rs6760828	1.0122573321e-08	-4.03976	0.999999746935731	0.565005408340299	8.2084542016e-06	3.32671795158183	0.999549331989531	1.67864257734912	2.24364798568942	4.88788e-31
rs1728922	1.0167495556e-08	-4.20857	0.999999745812676	1.26343349512287	8.2350059089e-06	3.10813438478989	0.999547874882665	0.977289995667799	2.24072349079066	4.8736e-31
rs6547626	1.0167495556e-08	-4.20892	0.999999745812676	1.26489437146578	8.2348911225e-06	3.10369557263081	0.999547881181914	0.963502719775693	2.22839709124147	4.8139e-31
rs2911713	1.0167898896e-08	-4.20658	0.999999745802592	1.2550905396692	8.2355798529e-06	3.10409893475784	0.999547843385764	0.964795763397999	2.2198863030672	4.7731e-31
rs4665976	1.0167898896e-08	-4.20649	0.999999745802592	1.25471509007351	8.2355798529e-06	3.10122762451346	0.999547843385764	0.955891082669969	2.21060617274347	4.72901e-31
rs1625123	1.0166083929e-08	-4.20896	0.999999745847967	1.26501122848095	8.2338006916e-06	3.08927463703972	0.999547941022591	0.918802799654859	2.18381402813581	4.60399e-31
rs11691432	1.0162252864e-08	-4.20824	0.999999745943743	1.26177387751404	8.2308741025e-06	3.0741943916764	0.999548101628011	0.872173585379327	2.13394746289337	4.38004e-31
rs1275509	1.0110503601e-08	3.57506141162196	0.999999747237474	-1.20488	8.19276129e-06	-3.79174	0.999550193188474	3.33206986433242	2.12719258702955	4.35055e-31
rs11126975	1.0122170881e-08	-4.0552	0.999999746945792	0.627505829468335	8.2082823001e-06	3.26297988488696	0.99954934142317	1.46871950464758	2.09622533411591	4.21789e-31
rs11681351	1.0096431361e-08	-3.84216	0.99999974758928	-0.215012	8.1706220649e-06	3.49324979096917	0.999551408152105	2.24396145989096	2.02894919334349	3.94346e-31
rs4665969	1.01263969e-08	-4.028	0.999999746840142	0.517782008122424	8.2113768025e-06	3.2726771474935	0.99954917160258	1.5005816838906	2.01836369201302	3.90194e-31
rs112796438	1.0127000689e-08	-4.02255	0.999999746825047	0.49584870804058	8.2122938041e-06	3.27388675057839	0.999549121279233	1.50459481011697	2.00044351815755	3.83264e-31
rs1275511	1.0110101401e-08	3.5586828312564	0.999999747247529	-1.26332	8.1923033284e-06	-3.77284	0.99955021832061	3.26058803636653	1.99727058167772	3.8205e-31
rs4665977	1.0143511225e-08	-4.20758	0.999999746412284	1.25806692337311	8.2153890625e-06	3.02283471434802	0.999548951417231	0.714736369252301	1.97280329262541	3.72816e-31
rs780102	1.0144115524e-08	-4.16607	0.999999746397176	1.08430932666402	8.2169942409e-06	3.06988937844711	0.99954886332806	0.858114480961792	1.94242380762582	3.6166e-31
rs13022659	1.00982401e-08	-3.7968	0.999999747544061	-0.388188	8.1725659129e-06	3.51018095194787	0.999551301476861	2.30334119917233	1.91515362551618	3.51931e-31
rs8179252	1.0105074576e-08	-3.8013	0.999999747373199	-0.370733	8.1783988441e-06	3.50151584556908	0.999550981375138	2.27333089138235	1.90259813670852	3.4754e-31
rs7589217	1.01022601e-08	-3.8014	0.999999747443561	-0.370486	8.1757108624e-06	3.50034273883301	0.999551128887151	2.26906238798905	1.89857681312882	3.46145e-31
rs10205219	1.0117141056e-08	-4.00733	0.999999747071538	0.434254076780211	8.2055894116e-06	3.26117	0.999549489203975	1.4626414281893	1.89689550496951	3.45563e-31
rs6743819	1.0117543396e-08	-4.00607	0.999999747061479	0.429254346443845	8.2058185764e-06	3.26172423182456	0.999549476627828	1.46447565720785	1.8937300036517	3.44471e-31
rs809673	1.0143108369e-08	-4.12062	0.999999746422355	0.895954470421648	8.2157903424e-06	3.06338789807139	0.999548929395743	0.838112865718951	1.7340673361406	2.93638e-31
rs1260341	1.0143309796e-08	-4.12061	0.999999746417319	0.895918550629501	8.2158476689e-06	3.06327603590654	0.999548926249773	0.837773821795961	1.73369237242546	2.93528e-31
rs780103	1.0143309796e-08	-4.12054	0.999999746417319	0.895632155377678	8.2159049956e-06	3.06333163546544	0.999548923103791	0.83794753575308	1.73357969113076	2.93495e-31
rs704791	1.0143309796e-08	-4.12045	0.999999746417319	0.895263940009324	8.2159049956e-06	3.06333861300474	0.999548923103791	0.83796890065274	1.73323284066206	2.93393e-31
rs11684134	1.0203424144e-08	-4.07844	0.999999744914461	0.7259854495113	8.2732167424e-06	3.1032186961117	0.99954577795273	0.9643338721568	1.6903193216681	2.81069e-31
rs7349418	9.991801681e-09	0.130412469112336	0.99999975020502	-7.59281	8.0738949316e-06	5.12711774932605	0.999556716409984	9.27719141795664	1.68438245329466	2.79405e-31
rs1260342	1.0143914089e-08	-4.11718	0.999999746402212	0.881824520114726	8.2164782736e-06	3.0428545512901	0.999548891643373	0.775492017815715	1.65731653793044	2.71944e-31
rs11682621	1.0181819025e-08	-3.64299	0.999999745454589	-0.956204	8.24091849e-06	3.58442191799909	0.999547550412112	2.57071658424903	1.61451306811687	2.6055e-31
rs1262430	1.0144719841e-08	-4.10358	0.999999746382068	0.825976808187606	8.2163636164e-06	3.01514432637227	0.999548897935544	0.691588679962487	1.51756548815009	2.36476e-31
rs1647276	1.0143914089e-08	-4.10488	0.999999746402212	0.831251493282957	8.2159623225e-06	3.00839046173705	0.999548919957799	0.671232476235805	1.50248396951876	2.32936e-31
rs780109	1.0146129984e-08	-4.10628	0.999999746346815	0.837101464572208	8.21796889e-06	3.00566156207486	0.999548809841158	0.66315185205029	1.5002533166225	2.32417e-31
rs1647266	1.0143712656e-08	-4.10322	0.999999746407248	0.824440800987625	8.2159049956e-06	3.00911615509674	0.999548923103791	0.673411450683403	1.49785225167103	2.3186e-31
rs1647265	1.0143712656e-08	-4.10319	0.999999746407248	0.8243185799402	8.2159049956e-06	3.00900102569828	0.999548923103791	0.673065175845009	1.49738375578521	2.31751e-31
rs7580759	1.0145727076e-08	-4.10248	0.999999746356887	0.821483816384075	8.2179115561e-06	3.00563018673104	0.999548812987534	0.663054118874332	1.48453793525841	2.28793e-31
rs780106	1.0143914089e-08	-4.10334	0.999999746402212	0.824935412952432	8.2161343044e-06	3.0020304356017	0.999548910519755	0.652138299798609	1.47707371275104	2.27092e-31
rs780107	1.0145727076e-08	-4.10645	0.999999746356887	0.837783324227737	8.2181408929e-06	2.99641403271323	0.999548800401964	0.635422606259424	1.47320593048716	2.26215e-31
rs1728912	1.0143511225e-08	-4.10616	0.999999746412284	0.836498706336656	8.2155037129e-06	2.9941736123952	0.999548945125432	0.628555163670133	1.46505387000679	2.24378e-31
rs7597145	1.0145928529e-08	-4.10299	0.999999746351851	0.823607592911277	8.2181408929e-06	2.99795585911474	0.999548800401964	0.640041660083239	1.46364925299452	2.24064e-31
rs4803	1.0144115524e-08	-4.10518	0.999999746397176	0.832520634962782	8.2164209449e-06	2.98986195371944	0.999548894789464	0.615715993054785	1.44823662801757	2.20637e-31
rs780104	1.0144316961e-08	-4.09354	0.99999974639214	0.784784055213585	8.2159049956e-06	3.00138504155125	0.999548923103791	0.650187997365746	1.43497205257933	2.17729e-31
rs4665378	1.0106683024e-08	-3.93479	0.999999747332988	0.145675463021439	8.1985441561e-06	3.20098417565685	0.999549875834945	1.26785024739876	1.4135257104202	2.13109e-31
rs1406295	1.0144115524e-08	-4.1025	0.999999746397176	0.821519247859682	8.2157330161e-06	2.98178494301035	0.999548932541703	0.591568666093806	1.41308791395349	2.13016e-31
rs1647285	1.0199586049e-08	-4.09084	0.999999745010414	0.776453985581853	8.2641875625e-06	2.97935820506131	0.999546273454282	0.587265956306188	1.36371994188804	2.02755e-31
rs1647286	1.0201808016e-08	-4.08766	0.999999744954865	0.763566923376313	8.2659700036e-06	2.97277969851064	0.999546175637792	0.567804098807323	1.33137102218364	1.96301e-31
rs1647267	1.0184644561e-08	-4.08057	0.999999745383951	0.733767312335743	8.25010729e-06	2.97632211120008	0.999547046149676	0.577380253815194	1.31114756615094	1.92371e-31
rs1049817	1.0091608849e-08	-3.94523	0.999999747709843	0.186076090392635	8.1862365456e-06	3.15584588069175	0.999550551255223	1.1236991308169	1.30977522120954	1.92108e-31
rs780100	1.0184644561e-08	-4.08173	0.999999745383951	0.738498773599991	8.2500498441e-06	2.97023281075379	0.999547049302187	0.559279808802422	1.29777858240241	1.89817e-31
rs780117	1.0146331441e-08	-4.09392	0.999999746341778	0.786430319610998	8.2187715856e-06	2.95182151776869	0.999548765790744	0.502897256948676	1.28932757655967	1.88219e-31
rs780112	1.0145324176e-08	-4.07653	0.99999974636696	0.715341142424205	8.2172235649e-06	2.97574453092023	0.999548850743191	0.573674117368246	1.28901525979245	1.88161e-31
rs59644396	1.0416855969e-08	-3.98576	0.999999739578669	0.362671541417482	8.4317059876e-06	3.06022233395552	0.999537080491222	0.841334072047754	1.20400561346524	1.72826e-31
rs10182937	1.0185048241e-08	-4.05893	0.999999745373859	0.645708493376931	8.2507966564e-06	2.95967859853364	0.999547008318687	0.528046270182079	1.17375476355901	1.67676e-31
rs1038693	1.0085180625e-08	0.246586009459796	0.999999747870548	-7.56626	8.1567931201e-06	-5.01763	0.999552167062956	8.72712024154596	1.16086097263778	1.65528e-31
rs10165668	1.00902025e-08	0.302588352414136	0.999999747745001	-7.55063	8.1605634889e-06	-5.00691	0.999551960150902	8.67366193320364	1.12302909681037	1.59383e-31
rs10202456	1.0092010681e-08	0.327890980399964	0.999999747699797	-7.54257	8.1617061969e-06	-5.00425	0.999551897440858	8.66041854708974	1.11785169325472	1.5856e-31
rs780088	1.0147338756e-08	-4.0411	0.999999746316595	0.571646424939148	8.2205491225e-06	2.94627068691907	0.9995486682429	0.486642642387861	1.05828906732701	1.49391e-31
rs7577019	1.0093015296e-08	0.289913799968148	0.999999747674681	-7.55425	8.1622204416e-06	-4.9945	0.999551869219908	8.61173628844583	1.05748796626318	1.49272e-31
rs704795	1.0150361001e-08	-4.0363	0.999999746241039	0.552408721054563	8.2223842009e-06	2.93609349008011	0.999548567537307	0.45683428145465	1.00924300250921	1.42241e-31
rs10189899	1.0111106916e-08	0.290026254549794	0.999999747222391	-7.55332	8.1786276289e-06	-4.98379	0.999550968819806	8.55930937681179	1.00598910518136	1.41779e-31
rs4666051	1.0116738724e-08	0.289223717961464	0.999999747081596	-7.55327	8.1830895721e-06	-4.9809	0.999550723955807	8.54515125523789	0.991876967354726	1.39792e-31
rs12467319	1.0062296721e-08	-3.37206	0.999999748442645	-1.91239	8.1429758881e-06	3.67519510511321	0.999552925332179	2.89411773075515	0.981722937417495	1.3838e-31
rs4666052	1.00881936e-08	0.271517323775388	0.999999747795224	-7.55965	8.1589067044e-06	-4.97353	0.999552051072683	8.50705901347387	0.947407595396593	1.33712e-31
rs10169261	1.0161446416e-08	-3.95773	0.999999745963904	0.238916065866324	8.2303576996e-06	2.97062944863116	0.999548129967186	0.559267886756727	0.79818395262305	1.15176e-31
rs813592	1.0139080249e-08	-3.97699	0.999999746523058	0.314224101606238	8.2141279609e-06	2.92782699413474	0.999549020624126	0.432108043011342	0.746332144617581	1.09356e-31
rs1260320	1.0142302681e-08	-3.98624	0.999999746442497	0.351205387651039	8.2154463876e-06	2.89909149902661	0.999548948271337	0.348506011854601	0.69971139950564	1.04375e-31
rs715325	1.0138274721e-08	-3.94282	0.999999746543196	0.178892138885302	8.2122938041e-06	2.88419274804499	0.999549121279233	0.305252488106381	0.484144626991683	8.41352e-32
rs2272417	1.0020610609e-08	-3.99766	0.999999749484797	0.390777246613156	8.1198212209e-06	2.3498120742719	0.999554196028591	-1.09824	-0.707461	2.55547e-32
rs12617913	1.0053070225e-08	0.397735002244053	0.999999748673308	-7.51916	8.1252362304e-06	-4.59702	0.999553898859999	6.70407849897495	-0.815081	2.29473e-32
rs1260345	9.98434613089e-09	-3.47391	0.999999750391409	-1.56766	8.0910664704e-06	2.1999557036787	0.999555774054399	-1.44076	-3.00842	2.55962e-33
rs1260329	9.98678436921e-09	-3.449	0.999999750330453	-1.65377	8.0939681001e-06	2.2280254060647	0.999555614816257	-1.37846	-3.03223	2.4994e-33
rs1260330	9.986804356e-09	-3.449	0.999999750329953	-1.65378	8.0939681001e-06	2.2280254060647	0.999555614816257	-1.37846	-3.03224	2.49937e-33
rs809059	9.98690429025e-09	-3.44654	0.999999750327455	-1.66225	8.0939681001e-06	2.22035226837353	0.999555614816257	-1.39552	-3.05777	2.43637e-33
rs1260328	9.98794363609e-09	-3.44877	0.999999750301471	-1.6545	8.0948785225e-06	2.0624220164139	0.99955556485332	-1.73351	-3.38801	1.75115e-33
rs4665409	9.78263421184e-09	0.258417991814549	0.999999755434205	-7.5785	7.9188774025e-06	-3.75907	0.999565223685715	3.19187776734131	-4.38662	6.45105e-34
rs60183653	9.77909365449e-09	0.252412546150089	0.999999755522719	-7.58022	7.9156697104e-06	-3.74575	0.999565399723602	3.14174044488133	-4.43848	6.12507e-34
rs1838209	1.01183481e-08	-2.26383	0.999999747041361	-5.03255	8.1829751481e-06	-2.95796	0.999550730235203	0.51886422526917	-4.51369	5.6813e-34
rs1275957	1.0183433569e-08	-2.1308	0.999999745414226	-5.32167	8.2341450304e-06	-3.05256	0.999547922125963	0.806114236594505	-4.51555	5.67069e-34
rs13394970	1.0217570724e-08	0.977502423774757	0.999999744560797	-7.11239	8.27367696e-06	-3.51533	0.999545752697013	2.32753726860142	-4.78485	4.33195e-34
rs6741646	1.0630847236e-08	-2.50309	0.99999973422889	-4.43758	8.6050702336e-06	2.55418893858405	0.999527566903199	-0.568408	-5.00598	3.47252e-34
rs4665947	1.0642604569e-08	-2.51008	0.999999733934957	-4.41952	8.6153403361e-06	2.50854629512911	0.999527003323676	-0.683297	-5.10282	3.15203e-34
rs1275923	1.02941316e-08	0.938409225310467	0.999999742646776	-7.1461	8.32784164e-06	-3.40537	0.999542780268863	1.95044014170809	-5.19566	2.87256e-34
rs4665946	1.0672129636e-08	-2.41821	0.99999973319683	-4.6445	8.6367217689e-06	2.51098226164834	0.999525830003666	-0.675951	-5.32045	2.53556e-34
rs2586886	1.0170924201e-08	0.895990124044382	0.99999974572696	-7.19103	8.2327677184e-06	-3.38085	0.999547997710111	1.8615722510036	-5.32946	2.51283e-34
rs1731243	1.0198374169e-08	0.917852792933744	0.999999745040711	-7.16985	8.2570597201e-06	-3.37051	0.999546664614957	1.82816144917395	-5.34169	2.48227e-34
rs1866561	1.05555076e-08	2.44518201284797	0.99999973611238	-4.58441	8.5458582889e-06	-2.4382	0.999530816215156	-0.861246	-5.44566	2.23716e-34
rs35021474	1.03103716e-08	0.860950364388418	0.999999742240776	-7.215	8.3530248256e-06	-3.26129	0.999541398281862	1.47190327029471	-5.7431	1.66158e-34
rs6758814	9.83383605649e-09	0.962206690418159	0.999999754154159	-7.14636	7.9373483289e-06	-3.2144	0.999564210003954	1.29476233597065	-5.8516	1.49073e-34
rs111882076	9.83917189476e-09	0.944756967757676	0.999999754020763	-7.16273	7.9420821489e-06	-3.2006	0.99956395021293	1.25080413771294	-5.91192	1.40346e-34
rs10177837	9.84308047129e-09	0.785613275773266	0.999999753923049	-7.30022	7.9444495881e-06	-3.20482	0.999563820288426	1.26446343902014	-6.03575	1.24e-34
rs11127157	9.74467096801e-09	0.358699935470865	0.999999756383285	-7.5495	7.9048696336e-06	-3.28008	0.999565992431411	1.50590137201842	-6.0436	1.23031e-34
rs1275979	1.0267363584e-08	0.689169824727617	0.999999743315976	-7.35023	8.3201094916e-06	-3.20891	0.999543204589601	1.30057068267117	-6.04966	1.22287e-34
rs11127155	9.73920291876e-09	0.370792016002043	0.999999756519986	-7.54537	7.9006528561e-06	-3.26672	0.999566223848193	1.46193679490882	-6.08344	1.18226e-34
rs11681188	9.72623971089e-09	0.219364500916127	0.999999756844066	-7.59072	7.8897506769e-06	-3.27668	0.999566822160368	1.49379987100816	-6.09692	1.16643e-34
rs1275985	1.0295552089e-08	0.851579331211133	0.999999742611264	-7.22375	8.3404862401e-06	-3.14816	0.999542086365983	1.10877742577001	-6.11497	1.14556e-34
rs1275978	1.0265539761e-08	0.709042726438279	0.999999743361572	-7.33643	8.3176290409e-06	-3.18255	0.999543340710535	1.21620242160509	-6.12023	1.13956e-34
rs11683682	9.74082145936e-09	0.211289054425932	0.999999756479523	-7.59171	7.9016647801e-06	-3.26879	0.999566168313786	1.46874235284447	-6.12297	1.13644e-34
rs34517788	9.74451302449e-09	0.207275946848633	0.999999756387234	-7.59236	7.9046447104e-06	-3.26823	0.999566004775195	1.46709105230947	-6.12527	1.13382e-34
rs11683675	9.74244013444e-09	0.208834918209836	0.999999756439056	-7.59214	7.9029578884e-06	-3.26718	0.999566097347989	1.46355789927254	-6.12859	1.13007e-34
rs1581035	9.74354564836e-09	0.206989405264342	0.999999756411418	-7.59247	7.9038575044e-06	-3.2663	0.99956604797706	1.46074251474867	-6.13173	1.12653e-34
rs11695281	9.74340745569e-09	0.20701417402924	0.999999756414873	-7.59247	7.9037450496e-06	-3.26617	0.999566054148579	1.46032355587199	-6.13215	1.12605e-34
rs11693535	9.74396023225e-09	0.206086423567669	0.999999756401054	-7.59264	7.9041948736e-06	-3.26581	0.999566029462238	1.45916596779895	-6.13347	1.12456e-34
rs11127156	9.74512506276e-09	0.359019787798301	0.999999756371933	-7.54936	7.9052070244e-06	-3.25004	0.999565973915406	1.40788771190335	-6.14148	1.1156e-34
rs1275986	1.0294943296e-08	0.840111763778286	0.999999742626484	-7.23347	8.3407172809e-06	-3.13893	0.999542073687072	1.07976846992795	-6.15371	1.10204e-34
rs35716623	9.72221636169e-09	0.356159604386555	0.99999975694465	-7.55156	7.8875599104e-06	-3.24542	0.999566942389837	1.39178977861767	-6.15977	1.09537e-34
rs34058130	9.72266993296e-09	0.355051945365078	0.999999756933311	-7.55193	7.8877284201e-06	-3.24424	0.999566933142008	1.38795777956621	-6.16398	1.09078e-34
rs35464330	9.72268965369e-09	0.355753384507884	0.999999756932818	-7.55168	7.8880092736e-06	-3.243	0.99956691772874	1.3839440695456	-6.16774	1.08668e-34
rs1275980	1.02718225e-08	0.717534287123828	0.999999743204503	-7.33007	8.3220133441e-06	-3.16422	0.99954310011096	1.15832247337364	-6.17174	1.08234e-34
rs2338016	9.744058944e-09	0.198929208201637	0.999999756398586	-7.59408	7.9048134025e-06	-3.25402	0.999565995517374	1.42080912117414	-6.17327	1.08068e-34
rs2338015	9.74399971689e-09	0.198815337999447	0.999999756400066	-7.59411	7.9047571716e-06	-3.25287	0.999565998603325	1.41704933135707	-6.17706	1.0766e-34
rs736699	1.0282771216e-08	0.75014792315885	0.999999742930786	-7.3056	8.3319977104e-06	-3.15112	0.999542552194385	1.11758263251896	-6.18802	1.06487e-34
rs1275982	1.0264729225e-08	0.711425751369491	0.999999743381835	-7.33478	8.3165908225e-06	-3.1605	0.999543397685376	1.14624212088193	-6.18853	1.06432e-34
rs1275988	1.0276282384e-08	0.732217969459022	0.999999743093006	-7.3192	8.3258794116e-06	-3.14158	0.999542887950958	1.08721197294965	-6.23199	1.01905e-34
rs34590437	9.72602274436e-09	0.361489384570769	0.99999975684949	-7.54946	7.8900877449e-06	-3.21402	0.999566803662048	1.29055685610288	-6.2589	9.91999e-35
rs1275984	1.0288653489e-08	0.723832480553666	0.999999742783729	-7.32471	8.3378872516e-06	-3.12962	0.999542228991657	1.05043409513518	-6.27427	9.76864e-35
rs1731249	1.0265945041e-08	0.724824073982689	0.99999974335144	-7.32509	8.3183789056e-06	-3.12828	0.99954329955983	1.04509172739167	-6.28	9.71283e-35
rs12617392	9.87288653376e-09	-2.01192	0.999999753177898	-5.58339	7.9844109489e-06	2.38790800058039	0.999561627223488	-1.01642	-6.59981	7.05432e-35
rs11688436	9.75172050064e-09	0.419454829733025	0.999999756207047	-7.5255	7.9135878721e-06	-3.03734	0.999565513974755	0.74002714753559	-6.78547	5.85898e-35
rs4665407	9.80717857344e-09	0.626071379524837	0.999999754820596	-7.41466	7.9467046201e-06	-2.9967	0.999563696532834	0.619573590533269	-6.79508	5.80296e-35
rs7575465	9.94078791225e-09	1.95013214180044	0.999999751480364	-5.70236	8.0444842384e-06	-2.33058	0.999558330441329	-1.14788	-6.85024	5.49153e-35
rs11890306	1.014049e-08	-2.84216	0.999999746487814	-3.55498	8.2030115281e-06	1.02532392487666	0.999549630673557	-3.32731	-6.88229	5.31833e-35
rs6749216	9.94005012004e-09	-2.18829	0.999999751498809	-5.2096	8.0350705444e-06	2.0907070436249	0.999558847057155	-1.6785	-6.8881	5.28752e-35
rs12714234	1.0141094209e-08	-2.84024	0.999999746472709	-3.56041	8.2032979396e-06	1.02274330165425	0.999549614955811	-3.32994	-6.89035	5.27567e-35
rs1009221	1.0748298276e-08	-1.38641	0.999999731292615	-6.60375	8.67420304e-06	-2.60479	0.999523773201222	-0.433947	-7.0377	4.55285e-35
rs12617735	9.81331946884e-09	1.95196553276628	0.999999754667073	-5.70524	7.92760336e-06	-2.25282	0.999564744806177	-1.3333	-7.03854	4.549e-35
rs34004783	1.0802484225e-08	0.963121181507673	0.999999729937967	-7.09851	8.7636721225e-06	-2.73212	0.999518863577307	-0.0892371	-7.18774	3.91849e-35
rs1275977	1.07765161e-08	0.880122338888354	0.99999973058717	-7.1762	8.7417792225e-06	-2.74316	0.999520064947698	-0.060276	-7.23648	3.7321e-35
rs12620759	9.77788724224e-09	1.92753673020291	0.999999755552879	-5.75443	7.8966058081e-06	-2.14023	0.999566445950319	-1.58245	-7.33688	3.37559e-35
rs1866560	9.86060916036e-09	1.8829896294685	0.999999753484832	-5.8351	7.9764445476e-06	-2.16901	0.999562064415924	-1.51544	-7.35053	3.32981e-35
rs13018636	9.75100950784e-09	0.606539729734109	0.999999756224822	-7.42956	7.8998096356e-06	-2.79976	0.999566270124153	0.0460803606142846	-7.38348	3.22188e-35
rs12714232	9.69027609664e-09	-0.526338	0.999999757743156	-7.47812	7.8330015625e-06	2.80812148280482	0.999569936566357	0.0652885685156002	-7.41283	3.12871e-35
rs4666053	9.75900967129e-09	0.542448098295638	0.999999756024818	-7.46597	7.90565689e-06	-2.79913	0.999565949226786	0.0446756825080943	-7.4213	3.10232e-35
rs7423104	9.77235056704e-09	2.67818991818336	0.999999755691296	-4.02607	7.9120688656e-06	-0.973539	0.999565597337751	-3.39709	-7.42315	3.09658e-35
rs13405885	1.0657878169e-08	1.44590602206573	0.999999733553117	-6.52372	8.6192152225e-06	-2.41871	0.999526790686564	-0.904283	-7.42801	3.08158e-35
rs11127169	9.78018146704e-09	2.00966077083932	0.999999755495523	-5.59265	7.8951446289e-06	-2.0157	0.999566526139905	-1.84119	-7.43384	3.06366e-35
rs11127134	1.0793547664e-08	-1.07072	0.999999730161381	-6.9895	8.7487583089e-06	2.59807020687463	0.999519681970814	-0.447168	-7.43667	3.055e-35
rs55769538	9.75711303961e-09	0.542313529010985	0.999999756072233	-7.46614	7.90453225e-06	-2.79322	0.999566010947022	0.0281122391389888	-7.43803	3.05084e-35
rs935168	1.0756386369e-08	0.873929015648954	0.999999731090413	-7.18257	8.7285975364e-06	-2.6368	0.999520788292613	-0.346997	-7.52957	2.78399e-35
rs13031756	9.73174358016e-09	0.461497056247567	0.99999975670647	-7.50801	7.8864365584e-06	-2.74883	0.99956700403951	-0.095998	-7.60401	2.58427e-35
rs4665408	9.74792883856e-09	0.435487726320651	0.999999756301838	-7.51884	7.9003155625e-06	-2.74479	0.999566242358873	-0.106199	-7.62504	2.53048e-35
rs11885857	1.0690112449e-08	1.6772895650576	0.99999973274726	-6.16089	8.6438352016e-06	-2.13614	0.999525439650038	-1.54609	-7.70697	2.33142e-35
rs12468863	9.83143639296e-09	0.884238192057575	0.999999754214151	-7.21846	7.9560664225e-06	-2.56115	0.99956318275979	-0.589675	-7.80814	2.1071e-35
rs11691179	1.07143201e-08	1.66081538015651	0.999999732142069	-6.18725	8.6661939456e-06	-2.08982	0.999524212703347	-1.64263	-7.82988	2.06178e-35
rs1057394	1.0156003729e-08	2.23295990156484	0.999999746099971	-5.10011	8.2240474176e-06	-1.49145	0.999548476263174	-2.73973	-7.83984	2.04135e-35
rs13014800	1.0678328896e-08	1.64358016567314	0.999999733041849	-6.21741	8.6347234801e-06	-2.07083	0.999525939660945	-1.68395	-7.90135	1.91956e-35
rs2117274	1.06791556e-08	1.63322043739114	0.999999733021181	-6.23434	8.63536996e-06	-2.07773	0.999525904184976	-1.66959	-7.90394	1.91461e-35
rs11692379	1.0711008036e-08	1.61707925097107	0.999999732224871	-6.25909	8.6613078601e-06	-2.08736	0.999524480829351	-1.64806	-7.90715	1.90847e-35
rs2196151	1.0676055625e-08	1.65094604403581	0.999999733098681	-6.20538	8.6331955329e-06	-2.06162	0.999526023507967	-1.70305	-7.90844	1.90601e-35
rs1007357	1.06750224e-08	1.64938056523422	0.999999733124511	-6.20801	8.6322553249e-06	-2.06229	0.999526075102453	-1.70172	-7.90973	1.90354e-35
rs1975213	1.06750224e-08	1.64901277584204	0.999999733124511	-6.20862	8.6321378025e-06	-2.06182	0.999526081551567	-1.7027	-7.91132	1.90052e-35
rs12992046	1.0674609124e-08	1.64680888131787	0.999999733134843	-6.21227	8.6319027601e-06	-2.06269	0.999526094449663	-1.70092	-7.9132	1.89696e-35
rs2217742	1.0676675584e-08	1.64994967482193	0.999999733083182	-6.207	8.6339007225e-06	-2.0586	0.999525984810261	-1.70923	-7.91623	1.89122e-35
rs11691513	1.0700868025e-08	1.65633911740538	0.999999732478371	-6.1953	8.6528340649e-06	-2.04019	0.999524945832781	-1.74585	-7.94115	1.84466e-35
rs11692834	1.0670476804e-08	1.63261631396542	0.999999733238151	-6.23574	8.6284950049e-06	-2.05252	0.999526281452357	-1.72203	-7.95777	1.81427e-35
rs2289017	1.067089e-08	1.63241045498548	0.999999733227821	-6.23605	8.6287300009e-06	-2.05201	0.999526268556802	-1.72306	-7.95911	1.81183e-35
rs2289018	1.0670683401e-08	1.63241657712079	0.999999733232986	-6.23605	8.6286712516e-06	-2.05194	0.999526271780707	-1.7232	-7.95925	1.81157e-35
rs11686707	1.0688458225e-08	1.62604826618949	0.999999732788616	-6.2456	8.6423064484e-06	-2.05299	0.999525523541206	-1.72027	-7.96587	1.79963e-35
rs56328264	1.0674609124e-08	1.63120656613562	0.999999733134843	-6.23784	8.6333718276e-06	-2.04808	0.999526013833688	-1.73084	-7.96868	1.79457e-35
rs2164043	1.0672129636e-08	1.63074748804522	0.99999973319683	-6.23871	8.6300225361e-06	-2.04736	0.99952619762812	-1.73251	-7.97122	1.79003e-35
rs10865440	1.0672336249e-08	1.63202880734123	0.999999733191665	-6.23661	8.6303163076e-06	-2.04434	0.999526181507225	-1.73867	-7.97528	1.78278e-35
rs11692689	1.0671923025e-08	1.62953390445767	0.999999733201996	-6.2407	8.6299050289e-06	-2.04611	0.999526204076401	-1.73507	-7.97577	1.7819e-35
rs11126714	1.0701695601e-08	1.60876373865383	0.999999732457682	-6.27293	8.65183396e-06	-2.0506	0.999525000714028	-1.72462	-7.99755	1.7435e-35
rs10865439	1.0673575969e-08	1.63478942630647	0.999999733160672	-6.23204	8.6313151681e-06	-2.02924	0.999526126694136	-1.76936	-8.00141	1.7368e-35
rs12472757	9.73271037025e-09	0.939309408085794	0.9999997566823	-7.1733	7.8745339456e-06	-2.4666	0.99956765725659	-0.832398	-8.0057	1.72937e-35
rs10186142	1.0667791225e-08	1.66632134385438	0.99999973330529	-6.18027	8.63066884e-06	-2.00115	0.999526162161791	-1.82596	-8.00623	1.72844e-35
rs11687642	1.0672542864e-08	1.6322550044527	0.9999997331865	-6.23623	8.6297875225e-06	-2.01967	0.999526210524638	-1.78881	-8.02504	1.69624e-35
rs55784432	1.0725709225e-08	1.54441172210689	0.999999731857341	-6.37327	8.6746742784e-06	-2.0659	0.999523747341846	-1.69184	-8.06511	1.62962e-35
rs13001778	1.0805810401e-08	1.69188367596271	0.999999729854813	-6.13092	8.7426071041e-06	-1.92928	0.999520019517737	-1.96071	-8.09163	1.58696e-35
rs3739081	9.73253279296e-09	0.949199015545302	0.999999756686739	-7.16397	7.8737482404e-06	-2.41534	0.999567700376233	-0.957525	-8.12149	1.54027e-35
rs2384463	9.77035379401e-09	1.01727854997365	0.999999755741215	-7.09509	7.9059942976e-06	-2.37817	0.99956593070986	-1.04455	-8.13964	1.51258e-35
rs4666065	9.85320272689e-09	0.616841269633389	0.999999753669993	-7.41805	7.9658853121e-06	-2.50488	0.999562643902497	-0.73154	-8.14959	1.49759e-35
rs3806517	1.0656639361e-08	1.59379449971423	0.999999733584087	-6.29901	8.6213878884e-06	-1.98839	0.999526671460037	-1.85196	-8.15097	1.49553e-35
rs56207024	1.0734410449e-08	1.65606570984586	0.999999731639811	-6.19419	8.6823926281e-06	-1.92445	0.999523323794836	-1.97347	-8.16766	1.47078e-35
rs2384465	1.0683703044e-08	1.65008417019795	0.999999732907495	-6.20645	8.6416009156e-06	-1.93184	0.999525562257709	-1.96157	-8.16801	1.47026e-35
rs884437	9.71671518756e-09	0.568650366123112	0.999999757082179	-7.45359	7.8688665225e-06	-2.50712	0.999567968285874	-0.732036	-8.18563	1.44459e-35
rs7561995	1.06770889e-08	1.63513984322075	0.999999733072849	-6.2313	8.6354875044e-06	-1.93508	0.999525897734657	-1.95567	-8.18697	1.44265e-35
rs1275942	9.72061908624e-09	-0.945912	0.999999756984582	-7.1677	7.8649398025e-06	2.38734511223235	0.999568183785147	-1.02528	-8.19297	1.43401e-35
rs1275941	9.718213561e-09	-0.903631	0.99999975704472	-7.20692	7.8628646464e-06	2.40176100539214	0.999568297670215	-0.990904	-8.19782	1.42707e-35
rs4665896	9.75671793121e-09	1.00909531759201	0.999999756082111	-7.10408	7.8950884324e-06	-2.35406	0.999566529223972	-1.10225	-8.20633	1.41499e-35
rs1320841	9.72351794241e-09	0.99156254214926	0.99999975691211	-7.12332	7.8685299081e-06	-2.35187	0.999567986759344	-1.10907	-8.2324	1.37858e-35
rs34391923	9.74627021824e-09	0.990804593043986	0.999999756343304	-7.12291	7.8866612224e-06	-2.34853	0.999566991709926	-1.11577	-8.23868	1.36995e-35
rs12992959	9.75124650256e-09	1.00685175658542	0.999999756218897	-7.10662	7.88991921e-06	-2.33443	0.999566812911257	-1.14857	-8.25519	1.34751e-35
rs1731259	9.74628996289e-09	-0.979268	0.99999975634281	-7.13427	7.8847516804e-06	2.34026951758916	0.999567096505802	-1.13525	-8.26952	1.32834e-35
rs7595637	9.73164493081e-09	0.951795809591775	0.999999756708936	-7.16155	7.8748145641e-06	-2.35197	0.999567641856197	-1.10845	-8.27	1.32771e-35
rs7586627	9.73164493081e-09	0.951875891417154	0.999999756708936	-7.16147	7.87475844e-06	-2.35093	0.999567644936297	-1.1109	-8.27237	1.32456e-35
rs1320840	9.73079656704e-09	0.95694552576517	0.999999756730145	-7.15667	7.8744216996e-06	-2.34791	0.99956766341667	-1.11801	-8.27468	1.3215e-35
rs7595648	9.73144763361e-09	0.95147093557808	0.999999756713868	-7.16187	7.87475844e-06	-2.34963	0.999567644936297	-1.11395	-8.27581	1.32001e-35
rs4665897	9.72696952516e-09	0.964925871023083	0.999999756825821	-7.1492	7.8716158096e-06	-2.34111	0.999567817404438	-1.13411	-8.28331	1.31014e-35
rs1627854	9.74317055625e-09	-0.966603	0.999999756420795	-7.14675	7.8820001001e-06	2.33927814524718	0.999567247512871	-1.13775	-8.2845	1.3086e-35
rs1731260	9.74244013444e-09	-0.964046	0.999999756439056	-7.14926	7.8812701696e-06	2.33901601504616	0.999567287571556	-1.1384	-8.28766	1.30446e-35
rs34552049	9.73780160809e-09	0.981372168507797	0.999999756555019	-7.13264	7.8795858436e-06	-2.33091	0.999567380007606	-1.15743	-8.29008	1.30131e-35
rs4665899	9.73101358681e-09	0.935416474480947	0.99999975672472	-7.17703	7.8735237604e-06	-2.34676	0.999567712695736	-1.12077	-8.2978	1.2913e-35
rs2011616	1.0185855625e-08	-1.99629	0.999999745353674	-5.5991	8.2497051729e-06	1.50895645543706	0.999547068217024	-2.71193	-8.31103	1.27434e-35
rs1631026	9.74433533956e-09	-0.939035	0.999999756391676	-7.17296	7.8832915984e-06	2.33814981550867	0.999567176635278	-1.1403	-8.31326	1.27149e-35
rs35486562	9.72775854436e-09	0.941590438550777	0.999999756806096	-7.17141	7.8711669136e-06	-2.3372	0.999567842039939	-1.14328	-8.31469	1.26967e-35
rs4665898	9.729257769e-09	0.948793049261433	0.999999756768615	-7.16452	7.87251364e-06	-2.33064	0.999567768131333	-1.1585	-8.32302	1.25914e-35
rs7584568	9.72300518809e-09	0.971773322529316	0.99999975692493	-7.14278	7.8689226256e-06	-2.32057	0.999567965206924	-1.18215	-8.32493	1.25674e-35
rs12463727	9.73010606569e-09	0.934570002625675	0.999999756747408	-7.17787	7.8740849664e-06	-2.31731	0.999567681896649	-1.18937	-8.36724	1.20467e-35
rs1275943	9.73249333156e-09	-0.952816	0.999999756687726	-7.16053	7.8729625744e-06	2.2875568449114	0.999567743493728	-1.25792	-8.41845	1.14454e-35
rs7355770	1.1450712064e-08	-0.359753	0.99999971373228	-7.46846	9.2518172224e-06	-2.35073	0.999492077420669	-1.03103	-8.49949	1.05544e-35
rs12466960	9.74628996289e-09	0.484584692772628	0.99999975634281	-7.49634	7.8957066049e-06	-2.39322	0.999566495298633	-1.0093	-8.50564	1.04897e-35
rs871521	9.72192056004e-09	0.0725827030075112	0.999999756952045	-7.61237	7.8745339456e-06	-2.41325	0.99956765725659	-0.962522	-8.57489	9.78787e-36
rs11127162	9.79913888836e-09	1.10030649374789	0.999999755021588	-7.00571	7.9248443121e-06	-2.12438	0.999564896222357	-1.61445	-8.62016	9.35464e-36
rs6547855	1.0970258121e-08	0.806452228873676	0.999999725743622	-7.22942	8.8705091556e-06	2.18470691727607	0.999513000948731	-1.42831	-8.65773	9.00971e-36
rs10186858	1.0479821641e-08	1.16945228629202	0.999999738004528	-6.89366	8.4953012089e-06	-1.98474	0.999533590599876	-1.86655	-8.76021	8.13212e-36
rs10189360	1.06832896e-08	0.947132352941176	0.999999732917831	-7.11933	8.6625439684e-06	-2.08411	0.999524412997373	-1.65476	-8.77408	8.02011e-36
rs4666041	1.0686597376e-08	-0.945024	0.999999732835137	-7.12116	8.6654285641e-06	2.05494766807872	0.99952425470397	-1.71491	-8.83608	7.538e-36
rs11691333	9.796842441e-09	1.02431828973823	0.999999755078999	-7.08655	7.9213539601e-06	-2.05321	0.999565087772474	-1.76326	-8.84981	7.43517e-36
rs1866559	1.0478593225e-08	-1.4403	0.999999738035238	-6.5403	8.4796857601e-06	1.74278757825405	0.999534447520804	-2.3182	-8.8585	7.3709e-36
rs56031699	1.0529017321e-08	0.355749383594352	0.999999736774636	-7.51185	8.5348116736e-06	2.22624801467769	0.999531422411048	-1.35598	-8.86782	7.30246e-36
rs13021557	9.71296975936e-09	-0.210235	0.999999757175815	-7.59336	7.8671835225e-06	-2.2632	0.99956806064928	-1.31368	-8.90704	7.02161e-36
rs11902826	1.0374644736e-08	-1.28179	0.999999740633949	-6.76102	8.3986938025e-06	1.82680423043081	0.999538892098255	-2.1731	-8.93412	6.83402e-36
rs7585127	1.0357336441e-08	1.26583211327392	0.999999741066656	-6.78218	8.3857734724e-06	-1.83615	0.999539601127961	-2.15677	-8.93895	6.80111e-36
rs10184824	1.0370774569e-08	-1.25686	0.999999740730703	-6.79285	8.3952744516e-06	1.8406362814327	0.999539079742075	-2.14795	-8.9408	6.78853e-36
rs2891534	1.0359982656e-08	1.25172915192958	0.999999741000501	-6.79981	8.3860051396e-06	-1.83724	0.999539588414738	-2.15474	-8.95455	6.69585e-36
rs7605526	1.0768627984e-08	-1.66821	0.999999730784373	-6.17241	8.7117064336e-06	1.42404694466655	0.999521715193268	-2.80918	-8.98159	6.51721e-36
rs12468721	1.0379738161e-08	-1.22334	0.999999740506613	-6.83399	8.3975346225e-06	1.82488051486447	0.999538955710602	-2.17668	-9.01067	6.33042e-36
rs12468761	1.0382591025e-08	-1.26801	0.999999740435292	-6.7782	8.4003747556e-06	1.79321611681169	0.999538799852568	-2.23377	-9.01197	6.32217e-36
rs12993894	1.0537843716e-08	0.456058214974575	0.999999736553977	-7.47071	8.5378502416e-06	2.12787649386029	0.999531255666014	-1.56986	-9.04057	6.14392e-36
rs11127146	9.70853531761e-09	-0.164029	0.999999757286676	-7.60224	7.8645471844e-06	-2.20725	0.999568205332121	-1.43886	-9.0411	6.14067e-36
rs2048240	9.83671207204e-09	0.678411618448037	0.999999754082259	-7.37901	7.9763315776e-06	-2.09649	0.999562070615669	-1.67005	-9.04907	6.09195e-36
rs13002640	9.71176743289e-09	-0.491726	0.999999757205873	-7.49463	7.8655007025e-06	-2.14762	0.999568153002823	-1.56857	-9.0632	6.00647e-36
rs10191551	1.03713856e-08	-1.20771	0.999999740715427	-6.85339	8.3910446929e-06	1.80459000321052	0.999539311858766	-2.21387	-9.06726	5.98211e-36
rs9309570	1.0372607716e-08	-1.1942	0.999999740684874	-6.86955	8.3935360656e-06	1.81290643250632	0.999539175139562	-2.19869	-9.06824	5.97628e-36
rs6705514	1.0270809025e-08	1.38264344565593	0.99999974322984	-6.63169	8.3146875904e-06	-1.67576	0.999543502130033	-2.44252	-9.07421	5.9407e-36
rs4665364	1.0370570896e-08	-1.19288	0.999999740735795	-6.87123	8.3913923041e-06	1.80927509415595	0.999539292782883	-2.20539	-9.07662	5.9264e-36
rs10193822	9.71194482064e-09	-0.166156	0.999999757201438	-7.60171	7.8659494369e-06	-2.18401	0.999568128376176	-1.48977	-9.09148	5.83895e-36
rs4233714	1.0370978244e-08	-1.19077	0.999999740725611	-6.87372	8.3915661124e-06	1.80223486443756	0.999539283244794	-2.21809	-9.09181	5.83708e-36
rs12991124	1.0374237316e-08	-1.19665	0.999999740644134	-6.86654	8.3949847081e-06	1.79762960713189	0.999539095642341	-2.22617	-9.09271	5.8318e-36
rs12622870	1.05534529e-08	0.318210843959895	0.999999736163747	-7.52334	8.5557420004e-06	2.12744528242542	0.999530273835589	-1.56973	-9.09307	5.82969e-36
rs4665365	1.0370570896e-08	-1.18935	0.999999740735795	-6.87543	8.3912184976e-06	1.80101561744846	0.999539302320874	-2.2203	-9.09573	5.81421e-36
rs893789	1.0268984896e-08	1.2864135154338	0.999999743275444	-6.7602	8.3130728976e-06	-1.7298	0.999543590740386	-2.35064	-9.11085	5.72699e-36
rs62139111	1.0691766801e-08	-0.395812	0.999999732705902	-7.48912	8.6521281025e-06	-2.09936	0.999524984572813	-1.62347	-9.11259	5.717e-36
rs935166	9.72174308121e-09	0.474147277505124	0.999999756956482	-7.5026	7.8582666276e-06	-2.12725	0.999568550010692	-1.61256	-9.11517	5.70229e-36
rs4343433	9.70999364449e-09	-0.201611	0.999999757250218	-7.59529	7.8650519809e-06	-2.17001	0.99956817762877	-1.52029	-9.11559	5.69991e-36
rs2175095	9.707569729e-09	-0.268674	0.999999757310816	-7.57965	7.8634254724e-06	-2.16071	0.999568266891946	-1.54053	-9.12018	5.67377e-36
rs2879180	9.70892944921e-09	-0.272485	0.999999757276823	-7.57855	7.8644910969e-06	-2.1597	0.999568208410216	-1.54263	-9.12118	5.66812e-36
rs12714094	1.0449132841e-08	-1.32673	0.999999738771747	-6.69883	8.4577435684e-06	1.67290645136888	0.999535651633622	-2.43878	-9.1376	5.57577e-36
rs11695406	1.0259258944e-08	1.3153483137193	0.999999743518592	-6.72303	8.3092674564e-06	-1.68699	0.999543799573663	-2.42397	-9.147	5.52362e-36
rs13031864	1.0555096644e-08	0.387381494675777	0.999999736122654	-7.49886	8.5516474624e-06	2.08611574656672	0.999530498527805	-1.657	-9.15586	5.47491e-36
rs4665418	9.87952505764e-09	0.629690590548092	0.999999753011935	-7.40871	7.9844109489e-06	-2.0506	0.999561627223488	-1.76466	-9.17337	5.37988e-36
rs1131375	1.0431353956e-08	-1.49462	0.999999739216219	-6.46284	8.44193025e-06	1.49131991051454	0.999536519416526	-2.72687	-9.18971	5.2927e-36
rs6547846	9.744058944e-09	0.0284040440878515	0.999999756398586	-7.61346	7.8914922724e-06	2.14178158750952	0.999566726581466	-1.57945	-9.19291	5.27576e-36
rs884438	9.71287120521e-09	0.529490968901281	0.999999757178279	-7.47529	7.8670152324e-06	-2.07223	0.999568069885078	-1.72748	-9.20277	5.22404e-36
rs10194841	9.92402485636e-09	1.06298572366427	0.99999975189944	-7.03975	8.0501010529e-06	-1.83689	0.999558022195398	-2.1758	-9.21554	5.15771e-36
rs13025751	9.92398500864e-09	1.03158828820147	0.999999751900436	-7.07263	8.0494768656e-06	-1.85449	0.999558056450249	-2.14336	-9.21599	5.1554e-36
rs7579759	9.92197280281e-09	1.03085963029482	0.999999751950741	-7.07348	8.0476611856e-06	-1.84759	0.999558156093186	-2.15623	-9.22972	5.08511e-36
rs4665986	9.71480295769e-09	1.45820418673406	0.999999757129985	-6.55219	7.8487944649e-06	-1.54295	0.999569069845864	-2.68495	-9.23714	5.04749e-36
rs2304682	1.0450563984e-08	1.40518253316117	0.999999738735969	-6.5916	8.4623973604e-06	-1.5357	0.99953539624911	-2.65852	-9.25012	4.98241e-36
rs4665381	9.70871267584e-09	1.4442297387266	0.999999757282242	-6.57278	7.8429682809e-06	-1.54794	0.999569389588884	-2.67762	-9.2504	4.98102e-36
rs4992933	1.0263918721e-08	1.25474035395959	0.999999743402098	-6.80069	8.3100745984e-06	-1.66773	0.999543755279683	-2.45622	-9.25691	4.94871e-36
rs11127168	9.79741652761e-09	1.07901545636121	0.999999755064647	-7.029	7.9224797961e-06	-1.80808	0.999565025986716	-2.23625	-9.26525	4.90761e-36
rs11887401	1.0262703025e-08	1.27512955925176	0.99999974343249	-6.77496	8.3090368516e-06	-1.64211	0.999543812228691	-2.49865	-9.27361	4.86676e-36
rs62139153	1.0624867929e-08	-0.131468	0.999999734378372	-7.56195	8.60718244e-06	-2.05785	0.999527450994247	-1.71232	-9.27427	4.86352e-36
rs7582361	1.0347975625e-08	-1.45397	0.999999741300676	-6.52679	8.3805039081e-06	1.47506485521139	0.999539890306436	-2.75462	-9.2814	4.82897e-36
rs62139612	9.95123958481e-09	0.9724667914379	0.999999751219072	-7.1305	8.0715651025e-06	-1.84955	0.999556844268636	-2.15114	-9.28164	4.82783e-36
rs11904656	1.0396453369e-08	1.33544521051754	0.999999740088733	-6.68976	8.4223004944e-06	-1.57715	0.999537596635049	-2.59641	-9.28617	4.80602e-36
rs3769137	1.04611984e-08	1.39324403597966	0.999999738470108	-6.60779	8.47799689e-06	-1.51983	0.999534540200145	-2.68183	-9.28963	4.78942e-36
rs1972669	9.70601306481e-09	1.40478343793234	0.999999757349732	-6.62911	7.8409520289e-06	-1.54187	0.999569500241548	-2.68711	-9.31623	4.66371e-36
rs12714092	1.05987025e-08	-1.82676	0.999999735032508	-5.9033	8.58138436e-06	0.911585990305182	0.999528866685575	-3.41489	-9.31819	4.65456e-36
rs4493210	9.70593424969e-09	1.40921469731127	0.999999757351703	-6.62288	7.8409520289e-06	-1.52239	0.999569500241548	-2.71694	-9.33982	4.55494e-36
rs6749052	9.705205225e-09	1.41409937572958	0.999999757369928	-6.61603	7.8403920049e-06	-1.51718	0.999569530975879	-2.7249	-9.34092	4.54994e-36
rs1080060	9.70595395344e-09	1.40902041031762	0.99999975735121	-6.62316	7.8410080324e-06	-1.52028	0.999569497168055	-2.72015	-9.34331	4.53908e-36
rs10205364	9.70150141444e-09	1.24823089621732	0.999999757462523	-6.83701	7.8368083249e-06	-1.65399	0.999569727649651	-2.50829	-9.3453	4.53005e-36
rs13423359	1.0514656681e-08	-1.3269	0.999999737133652	-6.69547	8.5014814329e-06	1.53676094837313	0.999533251451317	-2.65459	-9.35007	4.50851e-36
rs12105356	1.0397676961e-08	1.29641361590287	0.999999740058144	-6.74106	8.42334529e-06	-1.56579	0.999537539299932	-2.61419	-9.35525	4.48522e-36
rs3769138	1.0475727201e-08	-1.31487	0.999999738106889	-6.71323	8.4862098721e-06	1.54547545406799	0.999534089500296	-2.64207	-9.35529	4.48501e-36
rs2972052	1.0027418769e-08	-1.72291	0.999999749314594	-6.11533	8.0931715225e-06	-1.11127	0.999555658531526	-3.24227	-9.3576	4.4747e-36
rs2384654	9.70309711849e-09	1.15502571968939	0.999999757422631	-6.94893	7.8391040256e-06	-1.70636	0.999569601660682	-2.42019	-9.36912	4.42342e-36
rs62139154	1.0585734769e-08	-0.110804	0.999999735356701	-7.5663	8.5764051025e-06	-2.00889	0.999529139926978	-1.8136	-9.3799	4.37598e-36
rs6718128	9.70077255625e-09	1.30249511384116	0.999999757480745	-6.76785	7.8382081024e-06	-1.58701	0.9995696508293	-2.6167	-9.38455	4.3557e-36
rs7604798	9.6963409e-09	1.29959378490911	0.999999757591536	-6.77185	7.8329455876e-06	-1.58869	0.999569939638284	-2.61437	-9.38622	4.34842e-36
rs1057115	1.0416447721e-08	-1.27723	0.999999739588875	-6.76485	8.4344357241e-06	1.55502529087084	0.999536930691985	-2.63032	-9.39517	4.30967e-36
rs13035643	1.0414406601e-08	-1.27056	0.999999739639903	-6.77344	8.4325771321e-06	1.5559645854354	0.999537032685584	-2.62897	-9.40241	4.27859e-36
rs4665930	1.0419305625e-08	-1.24904	0.999999739517427	-6.80031	8.4372239961e-06	1.57165824924519	0.999536777680553	-2.60417	-9.40448	4.26975e-36
rs4665997	9.69383992329e-09	1.29480495605709	0.999999757654061	-6.77819	7.8310985281e-06	-1.58073	0.999570041005711	-2.62709	-9.40528	4.26634e-36
rs10165098	9.70098924096e-09	1.23660826693308	0.999999757475328	-6.85148	7.8360245041e-06	-1.62341	0.999569770666055	-2.55843	-9.40991	4.24662e-36
rs1919126	9.69431252409e-09	1.2929655483411	0.999999757642246	-6.78055	7.8306507889e-06	-1.57139	0.999570065577835	-2.64184	-9.42239	4.19398e-36
rs1881253	9.77308210921e-09	1.02321591682691	0.999999755673007	-7.08889	7.9060505329e-06	-1.75378	0.999565927623668	-2.33395	-9.42284	4.19206e-36
rs11691465	1.0346754961e-08	1.44518723149068	0.999999741331193	-6.53958	8.3768567184e-06	-1.3851	0.999540090453775	-2.88343	-9.42301	4.19136e-36
rs28381983	9.69726654009e-09	1.32212639388594	0.999999757568395	-6.74226	7.8370882704e-06	-1.54518	0.999569712286128	-2.68226	-9.42452	4.18503e-36
rs6754356	1.0321544025e-08	1.47371425759142	0.999999741961466	-6.49916	8.3627964225e-06	-1.35347	0.99954086204335	-2.92756	-9.42672	4.17583e-36
rs1919125	9.70010281881e-09	1.29688462987275	0.999999757497488	-6.77517	7.8356885929e-06	-1.56409	0.99957	-2.65295	-9.42813	4.16997e-36
rs6547734	9.69689233984e-09	1.2545799449188	0.99999975757775	-6.82931	7.8330015625e-06	-1.5984	0.999569936566357	-2.5989	-9.42821	4.16964e-36
rs4665995	9.69380054041e-09	1.30002813408073	0.999999757655045	-6.77142	7.8312104649e-06	-1.5605	0.99957003486257	-2.65885	-9.43026	4.16108e-36
rs4665996	9.69454882881e-09	1.29968342763473	0.999999757636338	-6.77182	7.8317141904e-06	-1.56043	0.999570007217894	-2.65892	-9.43075	4.15906e-36
rs11127165	9.78957872929e-09	0.971782543967545	0.999999755260592	-7.13936	7.9173016129e-06	-1.77378	0.999565310164915	-2.29798	-9.43734	4.13174e-36
rs10181727	1.0417468356e-08	-1.25386	0.999999739563359	-6.79438	8.43553936e-06	1.54637446632695	0.999536870127978	-2.64367	-9.43804	4.12882e-36
rs13018836	9.77559328656e-09	0.970465735357777	0.999999755610228	-7.14135	7.90790641e-06	-1.77266	0.999565825773165	-2.30054	-9.44189	4.11296e-36
rs3769136	1.0455471504e-08	1.38614403630247	0.999999738613281	-6.61794	8.4743285449e-06	-1.42282	0.999534741506277	-2.82472	-9.44266	4.10982e-36
rs17676954	1.06584976e-08	-0.520778	0.999999733537631	-7.43341	8.6275550529e-06	-1.90627	0.999526333032822	-2.01142	-9.44484	4.10087e-36
rs6742004	1.0342279809e-08	1.45008210665015	0.999999741443072	-6.53271	8.3794038784e-06	-1.36272	0.999539950672911	-2.91402	-9.44672	4.09313e-36
rs12996539	9.78055727089e-09	0.948481597464829	0.999999755486128	-7.16219	7.9115625625e-06	-1.78044	0.999565625123642	-2.28651	-9.4487	4.08507e-36
rs2119026	1.0336585561e-08	1.45872389814004	0.999999741585428	-6.52041	8.3752938801e-06	-1.35013	0.999540176217896	-2.93132	-9.45174	4.07268e-36
rs11126806	1.0283379649e-08	-0.990622	0.999999742915575	-7.09626	8.32149409e-06	1.72497660068638	0.999543128606318	-2.35846	-9.45473	4.06051e-36
rs10203050	1.03367889e-08	-1.08926	0.999999741580344	-6.9911	8.3649365284e-06	1.65893327616848	0.999540744600268	-2.46755	-9.45865	4.0446e-36
rs12478126	9.78142758121e-09	0.582590082415666	0.99999975546437	-7.44225	7.9302502449e-06	-1.92327	0.999564599545531	-2.02095	-9.4632	4.02625e-36
rs13026621	9.69502144689e-09	1.30153062105373	0.999999757624523	-6.7694	7.8319380736e-06	-1.53777	0.999569994931086	-2.694	-9.4634	4.02546e-36
rs12468388	9.77531644804e-09	0.964632417047806	0.999999755617149	-7.14701	7.9074002401e-06	-1.76366	0.999565853551758	-2.3165	-9.4635	4.02503e-36
rs6750943	9.70226970001e-09	1.2924250838324	0.999999757443316	-6.78083	7.8375921849e-06	-1.54416	0.999569684631098	-2.6838	-9.46463	4.0205e-36
rs6547709	9.69880280625e-09	1.29804	0.999999757529989	-6.77374	7.8350727744e-06	-1.53859	0.999569822897374	-2.69254	-9.46628	4.01385e-36
rs12615303	1.0465494601e-08	-1.919	0.999999738362703	-5.73687	8.4754930129e-06	0.453956520693718	0.99953467760428	-3.7334	-9.47027	3.9979e-36
rs6756238	9.70022100609e-09	1.19858218676674	0.999999757494534	-6.89782	7.8364164096e-06	-1.61292	0.999569749158122	-2.57538	-9.4732	3.98619e-36
rs12467291	9.77553396369e-09	0.954698684046837	0.999999755611711	-7.15653	7.9082438656e-06	-1.76319	0.99956580725361	-2.31727	-9.4738	3.98381e-36
rs6737921	9.69921643716e-09	1.19222700808045	0.999999757519648	-6.90547	7.8351287569e-06	-1.61635	0.999569819825032	-2.56992	-9.47539	3.97745e-36
rs4665999	9.69901946896e-09	1.22419367285518	0.999999757524572	-6.86686	7.8353526889e-06	-1.58971	0.99956980753555	-2.61259	-9.47944	3.96137e-36
rs1820297	9.70349113969e-09	1.30936803026811	0.99999975741278	-6.75873	7.8389920324e-06	-1.5163	0.999569607806913	-2.72632	-9.48505	3.93922e-36
rs11127071	9.69858614596e-09	1.19952600186431	0.999999757535405	-6.89677	7.8348488464e-06	-1.60436	0.999569835186636	-2.58925	-9.48602	3.93541e-36
rs3769139	1.0322356801e-08	1.46611679248812	0.999999741941146	-6.51029	8.3630277721e-06	-1.31645	0.999540849347523	-2.97694	-9.48723	3.93064e-36
rs6706610	9.70242730081e-09	1.2973079433792	0.999999757439376	-6.7745	7.8378161521e-06	-1.52184	0.999569672339689	-2.71798	-9.49248	3.91006e-36
rs72786729	1.05987025e-08	-0.0628701	0.999999735032508	-7.56985	8.5850758009e-06	-1.95169	0.999528664114407	-1.92632	-9.49617	3.89566e-36
rs7590263	9.93566381284e-09	0.84377062896653	0.999999751608467	-7.24816	8.0507820121e-06	-1.79612	0.999557984824958	-2.24977	-9.49793	3.88882e-36
rs12105168	9.72095430601e-09	-1.76556	0.999999756976201	-6.05646	7.8754319424e-06	0.926384018928704	0.999567607974368	-3.44418	-9.50064	3.87831e-36
rs62139143	1.0662008049e-08	-0.494814	0.99999973344987	-7.44643	8.62831876e-06	-1.88353	0.999526291123908	-2.05446	-9.50089	3.87733e-36
rs62139594	1.0514041444e-08	0.164184985078703	0.999999737149033	-7.56236	8.5257576121e-06	1.94482326389008	0.999531919263776	-1.94315	-9.50551	3.85944e-36
rs67100745	1.0382183449e-08	1.11509132128802	0.999999740445481	-6.96044	8.4099420001e-06	-1.6098	0.99953827483108	-2.54514	-9.50557	3.85921e-36
rs11126871	1.0650033601e-08	-1.46079	0.999999733749231	-6.50246	8.61833449e-06	1.2835167081105	0.99952683901737	-3.00472	-9.50718	3.85301e-36
rs2384571	1.0333942336e-08	1.47327260565043	0.999999741651508	-6.49921	8.3699118864e-06	-1.28608	0.999540471566514	-3.01603	-9.51524	3.82207e-36
rs868233	9.73989374281e-09	0.366615361700015	0.999999756502716	-7.54688	7.8934026304e-06	-1.94862	0.999566621740886	-1.97421	-9.52109	3.7998e-36
rs7560633	1.0634765625e-08	-1.3784	0.99999973413093	-6.62014	8.6034862489e-06	1.35674031849501	0.999527653825595	-2.90896	-9.52911	3.76945e-36
rs4666009	9.701856004e-09	0.959133180369144	0.999999757453659	-7.15607	7.83720025e-06	-1.73295	0.999569706140643	-2.37461	-9.53067	3.76355e-36
rs1396733	9.88133414401e-09	0.301864395014733	0.999999752966707	-7.56131	8.0081076196e-06	-1.94479	0.999560326763369	-1.97448	-9.53579	3.74435e-36
rs2304681	1.03713856e-08	-1.32584	0.999999740715427	-6.70374	8.4019979044e-06	1.42063119691439	0.999538710779024	-2.83211	-9.53585	3.74412e-36
rs3754733	1.0382794816e-08	1.22319816283269	0.999999740430197	-6.83401	8.4088980361e-06	-1.50855	0.999538332120645	-2.703	-9.53701	3.73978e-36
rs6547413	1.0337398929e-08	1.41201695632075	0.999999741565093	-6.58742	8.37465721e-06	-1.33351	0.999540211156544	-2.95365	-9.54107	3.72463e-36
rs11126784	1.0307122576e-08	1.40288010716678	0.999999742322002	-6.60174	8.3516954049e-06	-1.34432	0.999541471236878	-2.94056	-9.5423	3.72004e-36
rs34516683	9.90162314761e-09	1.7064947254914	0.999999752459482	-6.14978	8.0065229764e-06	-0.961994	0.999560413727601	-3.40233	-9.55211	3.68373e-36
rs11681562	1.0385851921e-08	1.07849986753147	0.999999740353769	-7.00039	8.4112180441e-06	-1.60524	0.99953820480568	-2.55239	-9.55278	3.68126e-36
rs4665943	1.0616211225e-08	-1.70117	0.99999973459479	-6.12402	8.5955685124e-06	0.889815882284724	0.999528088317792	-3.43366	-9.55768	3.66328e-36
rs13017378	9.71464525641e-09	0.913152920622263	0.999999757133928	-7.19845	7.8616869769e-06	-1.73986	0.999568362301014	-2.36107	-9.55952	3.65654e-36
rs10187665	1.0834103569e-08	1.43446347766772	0.999999729147484	-6.532	8.7950206096e-06	-1.25736	0.99951714333768	-3.0278	-9.55981	3.65549e-36
rs7574996	9.87310513225e-09	0.250776190452228	0.999999753172433	-7.57584	7.9993374561e-06	-1.937	0.999560808064674	-1.99013	-9.56597	3.63301e-36
rs13017554	1.0303265025e-08	1.35719422688538	0.999999742418441	-6.66498	8.3482856356e-06	-1.37252	0.999541658355854	-2.90247	-9.56744	3.62767e-36
rs11678188	1.0404816016e-08	1.04722363828869	0.999999739879667	-7.03272	8.4276412416e-06	-1.61382	0.999537303551607	-2.53761	-9.57033	3.61721e-36
rs4426489	9.88525108516e-09	0.214591760992752	0.999999752868784	-7.58365	8.0088434001e-06	-1.93836	0.999560286384198	-1.9869	-9.57055	3.61643e-36
rs1114551	1.0634146884e-08	-0.852473	0.999999734146399	-7.20681	8.6193326569e-06	1.70651970284788	0.99952678424227	-2.37256	-9.57937	3.58467e-36
rs1912055	9.91468275625e-09	1.69732606894474	0.999999752132993	-6.16473	8.01739225e-06	-0.943292	0.999559817228935	-3.41946	-9.58419	3.56745e-36
rs7355650	1.0377700641e-08	-1.13649	0.999999740557551	-6.93657	8.4037371664e-06	1.53993556220937	0.999538615333554	-2.65549	-9.59205	3.5395e-36
rs4493212	9.93365042329e-09	1.28735789026937	0.999999751658801	-6.77559	8.0575931881e-06	-1.44423	0.999557611033782	-2.81923	-9.59481	3.52974e-36
rs11685351	9.84734706244e-09	1.41534436855184	0.999999753816384	-6.60699	7.98740644e-06	-1.3231	0.999561462832414	-2.99112	-9.59812	3.51809e-36
rs7602823	1.0349806756e-08	-1.39309	0.999999741254898	-6.61336	8.3832832521e-06	1.30854219984182	0.999539737784041	-2.98611	-9.59947	3.51335e-36
rs7606840	1.0373015104e-08	1.00868941952714	0.99999974067469	-7.07386	8.4020558769e-06	-1.62212	0.999538707597667	-2.52571	-9.59957	3.51298e-36
rs60751755	9.86489941284e-09	1.4280291817942	0.999999753377575	-6.58807	8.0022225924e-06	-1.30687	0.999560649730075	-3.01153	-9.5996	3.51287e-36
rs10182585	1.08118404e-08	1.36679169070975	0.999999729704063	-6.62781	8.7778875625e-06	-1.29993	0.999518083508204	-2.97437	-9.60219	3.50381e-36
rs2384659	9.69222529081e-09	0.913652841925421	0.999999757694426	-7.19915	7.8298113124e-06	-1.71623	0.999570111648679	-2.4039	-9.60305	3.50078e-36
rs10203211	9.90739538881e-09	1.67693264440267	0.999999752315177	-6.1995	8.0115038116e-06	-0.960388	0.999560140382517	-3.40356	-9.60306	3.50074e-36
rs2053386	1.0371589281e-08	1.0516785970287	0.999999740710335	-7.02965	8.4002008561e-06	-1.59128	0.999538809395652	-2.57534	-9.60499	3.494e-36
rs10173426	1.0805394601e-08	1.35102790791638	0.999999729865208	-6.64953	8.7705414801e-06	-1.31441	0.999518486622687	-2.95586	-9.6054	3.49257e-36
rs6547740	9.69265847169e-09	0.894062343514001	0.999999757683597	-7.21684	7.8299792041e-06	-1.72489	0.999570102434708	-2.389	-9.60583	3.49105e-36
rs11685460	9.90930657025e-09	1.28084142427332	0.999999752267397	-6.78518	8.03835904e-06	-1.44288	0.999558666587146	-2.82236	-9.60755	3.48508e-36
rs6714547	1.034289e-08	1.40226155358899	0.999999741427817	-6.60088	8.3793459841e-06	-1.29155	0.999539953849985	-3.00842	-9.6093	3.47897e-36
rs10205008	9.75071326849e-09	0.908773749135405	0.999999756232228	-7.20059	7.8904248201e-06	-1.71064	0.999566785163333	-2.40963	-9.61022	3.47578e-36
rs6746337	1.0506865009e-08	-1.48758	0.999999737328444	-6.46974	8.5085389636e-06	1.1772405328872	0.99953286415959	-3.14182	-9.61156	3.47111e-36
rs6753495	9.90777362884e-09	1.67384651860901	0.999999752305721	-6.20465	8.0116170304e-06	-0.953722	0.999560134169142	-3.40993	-9.61458	3.46064e-36
rs10185736	1.0345127521e-08	-1.43883	0.999999741371879	-6.54882	8.3783039209e-06	1.24369414032675	0.999540011035432	-3.06912	-9.61794	3.44903e-36
rs4666007	9.69116206969e-09	0.887547908093662	0.999999757721007	-7.22272	7.8288599601e-06	-1.71886	0.999570163859321	-2.39945	-9.62217	3.43448e-36
rs6547741	9.69065016921e-09	0.887368182598529	0.999999757733804	-7.2229	7.8284122849e-06	-1.71892	0.99957018842794	-2.39937	-9.62228	3.43412e-36
rs6710214	1.0812256324e-08	1.36112981092881	0.999999729693665	-6.63552	8.7777690529e-06	-1.287	0.999518090011387	-2.99109	-9.62661	3.41926e-36
rs2384572	1.0328453641e-08	1.39922659870706	0.999999741788726	-6.60583	8.3662091536e-06	-1.27187	0.999540674762136	-3.03442	-9.64025	3.37296e-36
rs7604676	1.0748298276e-08	-0.554432	0.999999731292615	-7.41112	8.6986064356e-06	-1.78096	0.999522434057919	-2.23824	-9.64937	3.34233e-36
rs7597413	9.91422472804e-09	1.65041347712468	0.999999752144443	-6.24328	8.0165428225e-06	-0.956643	0.999559863844938	-3.40683	-9.65011	3.33985e-36
rs1528402	9.69202839361e-09	0.890768841653623	0.999999757699349	-7.21981	7.8294195721e-06	-1.69895	0.999570133147562	-2.43343	-9.65324	3.32942e-36
rs12617102	9.90229980609e-09	1.6734147118439	0.999999752442566	-6.20565	8.0068059369e-06	-0.910299	0.999560398198904	-3.45068	-9.65633	3.31913e-36
rs60039280	9.85348066609e-09	1.35055059855115	0.999999753663044	-6.69629	7.9925509521e-06	-1.34587	0.999561180504254	-2.96043	-9.65672	3.31786e-36
rs56104185	9.84702951684e-09	1.41247498291885	0.999999753824323	-6.61107	7.9880847424e-06	-1.28014	0.999561425607521	-3.04697	-9.65804	3.31348e-36
rs34951545	9.89814071236e-09	1.64542152229283	0.999999752546544	-6.25232	8.0061268401e-06	-0.95583	0.999560435467318	-3.40826	-9.66057	3.30508e-36
rs13401691	9.84131457156e-09	1.35473179346676	0.999999753967196	-6.69125	7.98288516e-06	-1.33963	0.999561710958051	-2.96941	-9.66066	3.30479e-36
rs10203313	9.89827999801e-09	1.64596276413432	0.999999752543061	-6.25142	8.0061268401e-06	-0.953427	0.999560435467318	-3.41055	-9.66197	3.30047e-36
rs4665935	1.0223838769e-08	-1.08686	0.999999744404096	-6.9992	8.2766111481e-06	1.53648880222183	0.999545591675332	-2.66839	-9.66759	3.28197e-36
rs4619559	9.90001120144e-09	1.67616091852364	0.999999752499781	-6.20117	8.0049950761e-06	-0.892281	0.999560497577833	-3.46703	-9.6682	3.27999e-36
rs11680542	1.0002200121e-08	1.0721320654728	0.99999974994506	-7.02606	8.10825625e-06	-1.55738	0.999554830699559	-2.64635	-9.67241	3.26621e-36
rs56357765	1.00020001e-08	1.05744425557444	0.99999974995006	-7.04171	8.1079715025e-06	-1.56292	0.999554846326151	-2.63773	-9.67944	3.24331e-36
rs4665924	1.0467131481e-08	-1.8154	0.999999738321782	-5.93023	8.4770069409e-06	0.41646488272489	0.999534594525131	-3.74962	-9.67985	3.24198e-36
rs12328574	9.83927108761e-09	1.3635323424714	0.999999754018283	-6.67939	7.9810770064e-06	-1.30967	0.999561810188671	-3.00919	-9.68858	3.2138e-36
rs10173507	9.84353685316e-09	1.36883079708027	0.999999753911639	-6.67194	7.9847500329e-06	-1.30217	0.999561608614723	-3.01875	-9.69069	3.20704e-36
rs62139593	1.0542360976e-08	0.144176828080564	0.999999736441045	-7.5641	8.5481386384e-06	1.84728017730836	0.999530691078411	-2.1267	-9.6908	3.20666e-36
rs11127160	9.89237116816e-09	1.63299162279661	0.999999752690782	-6.27298	8.0012608225e-06	-0.941983	0.999560702511441	-3.4217	-9.69468	3.19427e-36
rs10181687	1.0782537921e-08	-0.654163	0.999999730436625	-7.34927	8.7348029209e-06	-1.71801	0.99952044777206	-2.34626	-9.69552	3.19157e-36
rs17759709	1.0000200001e-08	1.05091949080509	0.999999749995063	-7.04868	8.1059214681e-06	-1.55661	0.999554958829532	-2.6477	-9.69638	3.18885e-36
rs2384628	9.76408801956e-09	1.29016914709948	0.999999755897859	-6.78057	7.8891327376e-06	-1.37855	0.999566856072931	-2.92243	-9.70301	3.16777e-36
rs12615690	9.73778187204e-09	1.01197403329138	0.999999756555512	-7.10214	7.8673518144e-06	-1.59512	0.999568051413383	-2.60194	-9.70408	3.16436e-36
rs2289360	1.0373829904e-08	1.37430781918863	0.99999974065432	-6.63819	8.4050707225e-06	-1.24419	0.999538542152016	-3.06692	-9.70511	3.16112e-36
rs4416177	9.89967290841e-09	1.65615882271946	0.999999752508239	-6.23451	8.0048253184e-06	-0.887593	0.999560506894033	-3.47121	-9.70572	3.15919e-36
rs4398231	9.89969280784e-09	1.65512195318059	0.999999752507741	-6.23623	8.0046555625e-06	-0.889441	0.999560516210134	-3.46958	-9.70581	3.15892e-36
rs11680308	9.90192167056e-09	1.6307065534166	0.999999752452019	-6.27623	8.0092396036e-06	-0.932065	0.999560264640801	-3.43049	-9.70672	3.15604e-36
rs4128451	9.89077986576e-09	1.64568175328097	0.999999752730564	-6.25226	7.9993374561e-06	-0.904968	0.999560808064674	-3.45598	-9.70824	3.15123e-36
rs4665366	1.0183029921e-08	-1.07087	0.999999745424317	-7.01845	8.2421816464e-06	1.5233374667354	0.999547481092658	-2.69059	-9.70904	3.14873e-36
rs61306479	9.88922846916e-09	1.6556152873057	0.999999752769349	-6.23594	7.9982627344e-06	-0.885892	0.999560867044787	-3.47312	-9.70907	3.14864e-36
rs13422027	9.88946713764e-09	1.64786245371851	0.999999752763383	-6.24873	7.9988849329e-06	-0.897862	0.999560832898888	-3.46241	-9.71115	3.14208e-36
rs12621347	9.88914891364e-09	1.65259512369751	0.999999752771338	-6.24094	7.9979799249e-06	-0.888143	0.999560882565212	-3.47115	-9.71209	3.13914e-36
rs4665934	1.0184039056e-08	-1.0702	0.999999745399088	-7.01912	8.2440191376e-06	1.5212556247475	0.999547380254895	-2.69364	-9.71277	3.13701e-36
rs1440042	1.0223029881e-08	1.12317400033627	0.999999744424318	-6.95911	8.27827984e-06	-1.47688	0.999545500101275	-2.75806	-9.71718	3.1232e-36
rs6708148	1.0195546729e-08	1.55367276400622	0.999999745111397	-6.38427	8.2665450256e-06	-1.0149	0.99954614408184	-3.33408	-9.71835	3.11952e-36
rs34732613	1.0358964841e-08	1.19231865119524	0.999999741025946	-6.87246	8.3898860409e-06	-1.4113	0.999539375442191	-2.84604	-9.7185	3.11908e-36
rs6748157	9.90100621444e-09	1.64819836026363	0.999999752474906	-6.2476	8.0060136601e-06	-0.88657	0.999560441678566	-3.47204	-9.71964	3.11552e-36
rs10184619	9.81672750436e-09	0.36869823596025	0.999999754581873	-7.54218	7.9512156441e-06	-1.83842	0.999563448969058	-2.17914	-9.72132	3.11029e-36
rs6754371	1.0276687876e-08	1.52037011462505	0.999999743082869	-6.43149	8.32784164e-06	-1.05027	0.999542780268863	-3.2939	-9.72539	3.09766e-36
rs12714204	9.73521635584e-09	1.1272844471111	0.99999975661965	-6.97894	7.8651641601e-06	-1.50109	0.999568171472349	-2.74759	-9.72652	3.09415e-36
rs13402525	1.079521e-08	1.27199230028874	0.999999730119823	-6.75366	8.7640273681e-06	-1.30092	0.999518844083269	-2.97387	-9.72754	3.09102e-36
rs11680633	1.0179195664e-08	0.984567656503985	0.999999745520173	-7.10734	8.2413203929e-06	-1.56684	0.999547528356497	-2.62345	-9.73079	3.08098e-36
rs7585410	1.01767744e-08	0.996282712133228	0.999999745580705	-7.09585	8.2388517156e-06	-1.554	0.999547663832508	-2.64364	-9.73949	3.0543e-36
rs1440044	1.0178993881e-08	0.983541643952384	0.999999745525218	-7.10836	8.2412055625e-06	-1.5591	0.999547534658156	-2.63555	-9.7439	3.04084e-36
rs6716275	1.0179195664e-08	0.983025413313246	0.999999745520173	-7.10885	8.2413203929e-06	-1.5593	0.999547528356497	-2.63523	-9.74408	3.04029e-36
rs7600164	9.79411081104e-09	0.478872371298194	0.99999975514729	-7.49665	7.9415185249e-06	-1.79926	0.999563981144487	-2.25096	-9.7476	3.02961e-36
rs714513	1.0176169129e-08	1.01555359497209	0.999999745595836	-7.0765	8.2392535681e-06	-1.53572	0.999547641779654	-2.67183	-9.74833	3.02741e-36
rs893790	1.0181819025e-08	-1.07654	0.999999745454589	-7.01243	8.2411481476e-06	1.49279279906923	0.999547537808969	-2.73669	-9.74912	3.02502e-36
rs6749426	9.73424944129e-09	1.01663958776554	0.999999756643823	-7.09759	7.86465936e-06	-1.56166	0.999568199175897	-2.6549	-9.75249	3.01482e-36
rs7589485	9.79106292004e-09	0.48875591461529	0.999999755223487	-7.49202	7.9385880025e-06	-1.79373	0.99956414197092	-2.26107	-9.75309	3.01302e-36
rs13020526	1.0176370884e-08	1.01441344990979	0.999999745590793	-7.07764	8.2392535681e-06	-1.53297	0.999547641779654	-2.67606	-9.7537	3.01119e-36
rs12616092	1.0177783225e-08	0.99542052832433	0.999999745555484	-7.09666	8.2399424809e-06	-1.54473	0.999547603973513	-2.65793	-9.75459	3.00852e-36
rs920433	1.0178388544e-08	0.985569145983665	0.999999745540351	-7.10639	8.2401147136e-06	-1.54996	0.999547594521731	-2.64983	-9.75622	3.00362e-36
rs4665384	9.73383506404e-09	1.01322316395061	0.999999756654183	-7.10108	7.8642106624e-06	-1.56141	0.999568223800529	-2.65532	-9.7564	3.00306e-36
rs2053385	1.0178186769e-08	0.994716861439036	0.999999745545396	-7.09734	8.2402295364e-06	-1.5437	0.999547588220488	-2.6595	-9.75684	3.00175e-36
rs6718978	1.0174353424e-08	1.55151286830313	0.999999745641229	-6.38866	8.2490158521e-06	-0.978904	0.999547106045516	-3.37102	-9.75968	2.99323e-36
rs4666003	9.73413104689e-09	1.01129921742682	0.999999756646783	-7.10301	7.8642106624e-06	-1.55959	0.999568223800529	-2.65817	-9.76118	2.98874e-36
rs722911	1.01787921e-08	0.984730895034195	0.999999745530262	-7.10719	8.2401721249e-06	-1.54374	0.999547591371115	-2.65943	-9.76663	2.97252e-36
rs77562583	1.0607352064e-08	1.49295090880845	0.999999734816269	-6.45697	8.5987351696e-06	-1.01925	0.99952791454487	-3.30999	-9.76696	2.97153e-36
rs2384626	9.73936081924e-09	1.24455608674593	0.999999756516039	-6.83965	7.8676323049e-06	-1.37544	0.999568036020002	-2.92807	-9.76772	2.96927e-36
rs11673927	1.0998975376e-08	0.480184217552157	0.999999725025691	-7.43801	8.90664336e-06	-1.72194	0.999511018117962	-2.32978	-9.76778	2.96908e-36
rs1866655	1.0187470489e-08	-1.07986	0.999999745313303	-7.00856	8.2457419716e-06	1.47737102739297	0.999547285709304	-2.75931	-9.76787	2.96883e-36
rs1528404	9.71892335716e-09	1.00398642384307	0.999999757026975	-7.11116	7.85344576e-06	-1.56097	0.999568814581306	-2.6567	-9.76787	2.96883e-36
rs11679069	1.0339839225e-08	1.23530510891479	0.999999741504086	-6.8212	8.3767409476e-06	-1.33746	0.999540096806947	-2.94826	-9.76947	2.96409e-36
rs12613822	1.0175967376e-08	1.02060946112058	0.99999974560088	-7.07136	8.2393683849e-06	-1.51849	0.99954763547874	-2.69812	-9.76948	2.96405e-36
rs13431542	1.0793963236e-08	1.26970758657863	0.999999730150992	-6.75662	8.7628432441e-06	-1.27058	0.999518909061862	-3.01293	-9.76956	2.96382e-36
rs6547355	1.0176976161e-08	0.997135238548389	0.999999745575661	-7.09499	8.2387943089e-06	-1.53366	0.999547666982872	-2.67503	-9.77002	2.96245e-36
rs920435	1.0157414656e-08	-1.46776	0.999999746064698	-6.51593	8.2332841969e-06	1.08869891300181	0.999547969366795	-3.25852	-9.77445	2.94937e-36
rs11897106	1.0179397449e-08	0.997898764037148	0.999999745515128	-7.09411	8.2410333184e-06	-1.52805	0.999547544110563	-2.68348	-9.77759	2.94011e-36
rs1509395	1.0121768449e-08	1.58830896458497	0.999999746955853	-6.33349	8.191044e-06	-0.904948	0.99955028743037	-3.44417	-9.77766	2.9399e-36
rs11678963	1.0792508769e-08	1.30724729754445	0.999999730187353	-6.70832	8.7608304169e-06	-1.22458	0.999519019515415	-3.0704	-9.77872	2.93677e-36
rs11680032	1.0177984996e-08	0.9950835596614	0.99999974555044	-7.09699	8.2398276601e-06	-1.52637	0.999547610274646	-2.68611	-9.78309	2.92397e-36
rs13021112	1.0336585561e-08	1.17645496660732	0.999999741585428	-6.89233	8.3728052164e-06	-1.379	0.999540312788711	-2.8921	-9.78442	2.92008e-36
rs1465881	1.0182020836e-08	0.946590886567697	0.999999745449544	-7.14387	8.2430429449e-06	-1.55576	0.999547433826353	-2.64064	-9.78451	2.91983e-36
rs7584145	1.0339635856e-08	1.28397781361866	0.99999974150917	-6.7599	8.3759884569e-06	-1.27839	0.999540138101495	-3.02552	-9.78543	2.91716e-36
rs7560595	1.0177379689e-08	1.00621512048611	0.999999745565573	-7.08588	8.24034436e-06	-1.51741	0.999547581919202	-2.6997	-9.78558	2.9167e-36
rs11687536	1.0176976161e-08	0.990377771830176	0.999999745575661	-7.10171	8.23862209e-06	-1.52742	0.999547676433898	-2.68458	-9.78629	2.91465e-36
rs3806520	1.0336585561e-08	1.24466651585046	0.999999741585428	-6.80975	8.3737890625e-06	-1.30965	0.999540258798019	-2.98523	-9.79498	2.88941e-36
rs3739088	1.02151449e-08	-1.5114	0.999999744621443	-6.4481	8.2779345796e-06	0.999812313616995	0.999545519048388	-3.34859	-9.79669	2.88448e-36
rs3739085	1.0189085481e-08	1.52725849753817	0.999999745272928	-6.42528	8.259876e-06	-0.975223	0.999546510063531	-3.37395	-9.79923	2.87716e-36
rs56001553	9.73166466064e-09	-0.754285	0.999999756708443	-7.33003	7.8601168881e-06	1.67316547712041	0.999568448467896	-2.47492	-9.80495	2.86074e-36
rs11680096	1.0337602276e-08	1.21690894427287	0.99999974156001	-6.84387	8.37465721e-06	-1.32466	0.999540211156544	-2.96541	-9.80928	2.84839e-36
rs35456427	1.0181819025e-08	0.941180318121005	0.999999745454589	-7.14898	8.2428132609e-06	-1.53979	0.999547446430942	-2.66536	-9.81435	2.834e-36
rs13032100	1.0182020836e-08	0.941171981844489	0.999999745449544	-7.14898	8.2428706816e-06	-1.53967	0.999547443279812	-2.66555	-9.81453	2.83347e-36
rs13032059	1.0182020836e-08	0.941175945929875	0.999999745449544	-7.14898	8.2428132609e-06	-1.53965	0.999547446430942	-2.66557	-9.81455	2.83342e-36
rs3754734	1.0335568896e-08	1.23858986465219	0.999999741610844	-6.81735	8.3731524496e-06	-1.29908	0.999540293733534	-2.99904	-9.81639	2.82822e-36
rs1053609	1.03306896e-08	1.2292896497442	0.999999741732827	-6.82906	8.3697383025e-06	-1.30778	0.999540481092311	-2.98792	-9.81698	2.82655e-36
rs11126836	1.0341059481e-08	1.24859623762182	0.99999974147358	-6.80464	8.3776671364e-06	-1.28728	0.999540045980347	-3.01402	-9.81866	2.8218e-36
rs13014240	1.0332315904e-08	1.22878954824492	0.999999741692169	-6.8296	8.3708376976e-06	-1.30559	0.999540420760597	-2.99071	-9.8203	2.81717e-36
rs6547738	9.73446649956e-09	0.98124937920242	0.999999756638397	-7.13293	7.8649398025e-06	-1.53834	0.999568183785147	-2.69102	-9.82395	2.8069e-36
rs11688708	1.0188076096e-08	0.963995997463739	0.999999745298162	-7.12694	8.2483265601e-06	-1.51865	0.999547143872429	-2.69734	-9.82428	2.80598e-36
rs6707735	1.0202818081e-08	1.54749576770387	0.999999744929613	-6.39349	8.27195121e-06	-0.913915	0.999545847402338	-3.43111	-9.8246	2.80509e-36
rs6547356	1.0176572641e-08	1.01104293262225	0.999999745585749	-7.08105	8.2385072784e-06	-1.48627	0.999547682734527	-2.74657	-9.82762	2.79664e-36
rs1992311	1.0183635396e-08	1.48102344570624	0.99999974540918	-6.49509	8.2563126244e-06	-1.01522	0.999546705613981	-3.33439	-9.82948	2.79145e-36
rs6759548	1.0181415409e-08	1.48718075775745	0.99999974546468	-6.48606	8.2545312249e-06	-1.00513	0.999546803373413	-3.34468	-9.83074	2.78793e-36
rs10865461	1.0332925801e-08	1.22345082684873	0.999999741676922	-6.83611	8.3716478244e-06	-1.29753	0.999540376303119	-3.00114	-9.83726	2.76981e-36
rs1078809	1.0332925801e-08	1.22812367807498	0.999999741676922	-6.83038	8.3713584889e-06	-1.29046	0.999540392181036	-3.0103	-9.84069	2.76033e-36
rs12997235	1.0354894081e-08	-0.798843	0.999999741127715	-7.26439	8.38623681e-06	1.59027590731724	0.999539575701339	-2.57777	-9.84216	2.75625e-36
rs10196501	1.0205848576e-08	-1.53532	0.999999744853851	-6.41211	8.2736194321e-06	0.912776083910735	0.999545755854016	-3.43205	-9.84416	2.75075e-36
rs6547401	1.0334348964e-08	1.22498967125066	0.999999741641343	-6.83416	8.37234225e-06	-1.28803	0.99954	-3.01338	-9.84754	2.74147e-36
rs12615423	1.0189085481e-08	-1.46689	0.999999745272928	-6.51566	8.2603358464e-06	1.01327729221177	0.999546484828147	-3.33611	-9.85177	2.72991e-36
rs10432697	1.0338008976e-08	1.23544395924309	0.999999741549842	-6.82112	8.3747150881e-06	-1.27045	0.999540207980358	-3.03572	-9.85684	2.7161e-36
rs6738089	9.72777827025e-09	1.15994707465819	0.999999756805602	-6.94196	7.8593319025e-06	-1.38458	0.999568491548115	-2.91599	-9.85795	2.71307e-36
rs11126857	1.0336382224e-08	-1.29953	0.999999741590511	-6.73997	8.3713006224e-06	1.19508039207554	0.999540395356587	-3.12879	-9.86876	2.68392e-36
rs7560144	1.0333332409e-08	1.21798668017668	0.999999741666756	-6.84276	8.3715320896e-06	-1.27672	0.999540382654318	-3.02793	-9.87069	2.67874e-36
rs62138969	9.72998769649e-09	1.12252853031254	0.999999756750367	-6.98455	7.8606215424e-06	-1.40542	0.999568420772335	-2.88686	-9.87141	2.67681e-36
rs4665406	1.0459766529e-08	-0.334814	0.999999738505905	-7.52238	8.4583252224e-06	1.72489959839357	0.999535619714392	-2.35045	-9.87283	2.67301e-36
rs11127164	9.77195515024e-09	0.478296099671027	0.999999755701181	-7.49805	7.8985729936e-06	-1.72821	0.999566337991102	-2.37891	-9.87696	2.66199e-36
rs920437	1.0190498704e-08	-1.45459	0.999999745237597	-6.53355	8.2614855184e-06	1.00432456128143	0.99954642173662	-3.34507	-9.87862	2.65759e-36
rs62139592	1.0586557881e-08	0.233898980474483	0.999999735336123	-7.54505	8.58255616e-06	1.72927703440743	0.999528802381978	-2.33562	-9.88067	2.65214e-36
rs4572551	1.0216559929e-08	1.05570010981727	0.999999744586067	-7.03294	8.2726990129e-06	-1.41185	0.999545806364574	-2.85228	-9.88522	2.64009e-36
rs4260197	9.73659774564e-09	1.03825518727286	0.999999756585116	-7.07526	7.8651641601e-06	-1.45685	0.999568171472349	-2.81299	-9.88825	2.63211e-36
rs6748067	9.86762102881e-09	1.5633119546911	0.999999753309535	-6.38559	7.9790995729e-06	-0.852666	0.999561918709315	-3.50319	-9.88879	2.6307e-36
rs34787802	9.91109847025e-09	0.193450823418329	0.9999997522226	-7.58666	8.0137683396e-06	-1.76763	0.999560016106702	-2.30282	-9.88948	2.62887e-36
rs4441421	1.0294334521e-08	1.38994293373809	0.999999742641703	-6.62043	8.3463787801e-06	-1.05832	0.999541762998991	-3.28429	-9.90472	2.58911e-36
rs1866654	1.0344720681e-08	1.33538821539883	0.99999974138205	-6.69233	8.3798091441e-06	-1.12117	0.999539928433091	-3.21384	-9.90617	2.58536e-36
rs7562	9.78894550881e-09	-0.426756	0.999999755276422	-7.52051	7.9396587076e-06	1.72162442240945	0.99956408321085	-2.38768	-9.90819	2.58015e-36
rs11679681	1.0331096164e-08	1.20184569370929	0.999999741722663	-6.8624	8.3692175616e-06	-1.26216	0.999540509669111	-3.04654	-9.90894	2.57822e-36
rs6745807	1.0588821604e-08	0.991457891974889	0.99999973527953	-7.0808	8.5717786176e-06	-1.41533	0.999529393809789	-2.82963	-9.91044	2.57436e-36
rs4665929	1.0253992644e-08	-1.39737	0.99999974365025	-6.61205	8.3131882276e-06	1.04478957846327	0.99954358441136	-3.30051	-9.91256	2.5689e-36
rs6761095	9.73567023025e-09	1.12832232858178	0.999999756608304	-6.97774	7.8641545761e-06	-1.36788	0.999568226878558	-2.93866	-9.9164	2.55906e-36
rs4665363	1.0192315849e-08	-1.44831	0.999999745192169	-6.54258	8.26275025e-06	0.966070620977561	0.999546352330879	-3.38266	-9.92524	2.53653e-36
rs3820822	1.0252980049e-08	-1.38806	0.999999743675565	-6.62505	8.31226561e-06	1.04394228434671	0.999543635042342	-3.30145	-9.9265	2.53333e-36
rs3769135	1.0233750244e-08	-1.48953	0.999999744156309	-6.48	8.2918657936e-06	0.894508188751059	0.999544754535336	-3.44745	-9.92744	2.53094e-36
rs55656412	1.0775893249e-08	-0.355936	0.999999730602741	-7.50019	8.7265295649e-06	-1.65708	0.999520901772626	-2.4495	-9.94969	2.47526e-36
rs6547317	1.0200596004e-08	1.4935741301808	0.999999744985165	-6.47559	8.2706282569e-06	-0.861169	0.999545920003076	-3.47798	-9.95357	2.46567e-36
rs4666067	9.95070091024e-09	0.813683170063717	0.999999751232539	-7.27233	8.0603184649e-06	-1.53531	0.999557461473135	-2.68342	-9.95575	2.4603e-36
rs35538505	1.0505840004e-08	-1.19841	0.999999737354069	-6.85813	8.5198020769e-06	1.21281523329234	0.999532246081343	-3.09867	-9.9568	2.45772e-36
rs3820821	1.0249335121e-08	1.38102905006964	0.999999743766688	-6.63497	8.3103052176e-06	-1.0233	0.999543742623866	-3.32289	-9.95786	2.45512e-36
rs3820823	1.0213527844e-08	1.44274801606934	0.999999744661869	-6.54958	8.2785675625e-06	-0.932484	0.999545484311713	-3.41357	-9.96315	2.44216e-36
rs56069215	1.0784199409e-08	-0.296089	0.999999730395088	-7.51932	8.7337389841e-06	-1.65909	0.999520506155589	-2.44576	-9.96508	2.43746e-36
rs6753827	9.75089101156e-09	0.0522602297193017	0.999999756227784	-7.61215	7.8945826729e-06	-1.74206	0.999566556980082	-2.35514	-9.96729	2.43208e-36
rs884439	9.70790472369e-09	0.298603351104805	0.999999757302441	-7.57114	7.8598365316e-06	-1.7159	0.999568463853935	-2.40256	-9.9737	2.41654e-36
rs11677841	1.0183635396e-08	1.03936024733932	0.99999974540918	-7.05167	8.2434448996e-06	-1.35925	0.999547411767901	-2.9269	-9.97857	2.4048e-36
rs9309559	1.0292305401e-08	-1.3154	0.999999742692431	-6.72135	8.3425657225e-06	1.07782297851715	0.999541972249471	-3.26371	-9.98506	2.38924e-36
rs9309558	1.02900736e-08	-1.3163	0.999999742748226	-6.72029	8.3407750416e-06	1.0721942909378	0.999542070517317	-3.26986	-9.99015	2.37711e-36
rs11689469	9.84458855601e-09	1.26114821724271	0.999999753885347	-6.81349	7.9717004964e-06	-1.1742	0.999562324767452	-3.17795	-9.99143	2.37406e-36
rs4666004	9.72162476289e-09	0.788877698702716	0.99999975695944	-7.30385	7.8546228121e-06	-1.53746	0.999568749984332	-2.69302	-9.99688	2.36117e-36
rs4666006	9.72201916009e-09	0.787911395807112	0.99999975694958	-7.3046	7.8549030756e-06	-1.53738	0.999568734603388	-2.69314	-9.99774	2.35914e-36
rs3769134	1.0199788036e-08	-1.47124	0.999999745005364	-6.50874	8.26792516e-06	0.843552201432844	0.999546068343085	-3.49315	-10.0019	2.34935e-36
rs4666005	9.71935713424e-09	0.782088474319077	0.999999757016131	-7.3093	7.8521006656e-06	-1.53761	0.999568888400502	-2.69295	-10.0023	2.3485e-36
rs113943128	9.76527381636e-09	0.226891683212001	0.999999755868214	-7.58704	7.9103250009e-06	-1.70454	0.999565693040971	-2.41878	-10.0058	2.34015e-36
rs2279990	9.98276743044e-09	-0.4626	0.999999750430877	-7.49477	8.0933422144e-06	1.64036795928123	0.999555649164149	-2.51464	-10.0094	2.33177e-36
rs6706127	1.0289262096e-08	-1.31262	0.999999742768514	-6.72516	8.3403707209e-06	1.05450887647725	0.999542092705373	-3.28868	-10.0138	2.32146e-36
rs6738528	1.0189287364e-08	-1.43092	0.999999745267881	-6.56776	8.2611980929e-06	0.896890645494619	0.999546437509913	-3.44716	-10.0149	2.31894e-36
rs4665920	1.0339839225e-08	-1.3491	0.999999741504086	-6.67416	8.3799828324e-06	0.992296584934469	0.999539918901575	-3.34995	-10.0241	2.29773e-36
rs2940799	9.90677827584e-09	-0.714289	0.999999752330605	-7.35048	8.0167127044e-06	-1.54087	0.999559854521935	-2.67758	-10.0281	2.28867e-36
rs10175737	1.0290276481e-08	-1.31749	0.999999742743154	-6.71871	8.34112161e-06	1.03260621169627	0.999542051498556	-3.31148	-10.0302	2.2838e-36
rs877273	1.0289262096e-08	-1.31822	0.999999742768514	-6.71779	8.3404284804e-06	1.02924189225687	0.999542089535684	-3.31499	-10.0328	2.27789e-36
rs7576048	1.0460993841e-08	-0.371	0.999999738475222	-7.50955	8.4590232336e-06	1.62068669114714	0.99953558140987	-2.52466	-10.0342	2.27465e-36
rs6547318	1.0197566289e-08	1.45367041977363	0.999999745060908	-6.53454	8.2683277209e-06	-0.834712	0.999546046251426	-3.50054	-10.0351	2.27266e-36
rs12714002	1.0317277476e-08	-1.36494	0.99999974206813	-6.65376	8.3617553889e-06	0.958951055964201	0.999540919172399	-3.38356	-10.0373	2.26759e-36
rs2338439	9.74836326244e-09	0.270892034946493	0.999999756290978	-7.57695	7.8945826729e-06	-1.67809	0.999566556980082	-2.4645	-10.0415	2.25823e-36
rs877274	1.0289059225e-08	-1.31916	0.999999742773586	-6.71656	8.3401974436e-06	1.01715063332341	0.999542102214376	-3.32737	-10.0439	2.25264e-36
rs2879179	9.97543510441e-09	0.786386468970365	0.999999750614185	-7.29293	8.0800905025e-06	-1.48765	0.99955637640351	-2.7542	-10.0471	2.24545e-36
rs10196691	1.0294740369e-08	-1.32181	0.999999742631557	-6.71279	8.3429123281e-06	1.00584750779841	0.999541953228672	-3.33864	-10.0514	2.23583e-36
rs4666072	9.90904775364e-09	-0.539782	0.999999752273867	-7.45979	8.0331998041e-06	1.59247289444623	0.999558949721916	-2.59575	-10.0555	2.22665e-36
rs12993460	9.98258758641e-09	1.09631489026942	0.999999750435373	-7.00082	8.0888479281e-06	-1.2651	0.999555895805515	-3.05984	-10.0607	2.21527e-36
rs7559003	9.74964684409e-09	0.0696979855236413	0.999999756258888	-7.61115	7.8934026304e-06	-1.68575	0.999566621740886	-2.45168	-10.0628	2.21047e-36
rs62139151	1.0798119396e-08	-0.31385	0.999999730047088	-7.51326	8.7434350249e-06	-1.59281	0.999519974085629	-2.55292	-10.0662	2.20309e-36
rs11901535	9.77268667761e-09	0.214082173323258	0.999999755682893	-7.58948	7.9143192976e-06	-1.66858	0.999565473834167	-2.47914	-10.0686	2.19769e-36
rs34803465	1.0297175625e-08	-1.30508	0.999999742570676	-6.73464	8.3461476609e-06	1.00259261951491	0.999541775682196	-3.34171	-10.0764	2.18078e-36
rs4316900	1.0288247761e-08	-1.3052	0.999999742793872	-6.73492	8.3386380289e-06	1.00224748672805	0.999542187790964	-3.34251	-10.0774	2.17845e-36
rs12612520	1.0302453001e-08	-1.30559	0.999999742438741	-6.73372	8.3507128576e-06	0.996120785117103	0.999541525156426	-3.3479	-10.0816	2.16933e-36
rs4665927	1.0194133156e-08	-1.35922	0.999999745146736	-6.66755	8.2648200196e-06	0.932532366793513	0.99954623874641	-3.41436	-10.0819	2.1687e-36
rs12613534	1.0295755024e-08	-1.30262	0.999999742606191	-6.73792	8.3449921129e-06	0.998161847429875	0.999541839095596	-3.34621	-10.0841	2.16388e-36
rs12618836	1.0299002256e-08	-1.30289	0.99999974252501	-6.73742	8.3481122761e-06	0.996123641976804	0.99954166786936	-3.34805	-10.0855	2.16099e-36
rs12612619	1.0299002256e-08	-1.30349	0.99999974252501	-6.73663	8.34805449e-06	0.99380126674281	0.999541671040506	-3.35037	-10.087	2.15768e-36
rs4665412	9.734782225e-09	-0.102253	0.999999756630504	-7.60911	7.8855940969e-06	-1.66988	0.999567050273889	-2.47879	-10.0879	2.15573e-36
rs877272	1.0290479364e-08	1.29122059896295	0.999999742738082	-6.75296	8.3420458276e-06	-1.00676	0.999542000779931	-3.33777	-10.0907	2.14965e-36
rs55960107	1.0865560644e-08	-0.208765	0.999999728361058	-7.5376	8.7974526025e-06	-1.59053	0.999517009882985	-2.55348	-10.0911	2.14889e-36
rs1528403	9.75237226681e-09	0.803491703129288	0.999999756190753	-7.29064	7.8811017289e-06	-1.46287	0.999567296815605	-2.80319	-10.0938	2.14299e-36
rs11692928	9.97939062961e-09	1.28173146514056	0.999999750515297	-6.78052	8.1029038336e-06	-1.03288	0.99955512443367	-3.32567	-10.1062	2.11667e-36
rs6720961	9.98374660969e-09	1.27742854941067	0.999999750406397	-6.7858	8.1064339524e-06	-1.03105	0.999554930705018	-3.32734	-10.1131	2.102e-36
rs6705861	9.98382654481e-09	1.27375046412548	0.999999750404399	-6.79049	8.1064339524e-06	-1.03324	0.999554930705018	-3.32508	-10.1156	2.0969e-36
rs7579579	1.0194133156e-08	-1.36983	0.999999745146736	-6.65308	8.2643025529e-06	0.876254448181942	0.999546267143858	-3.46526	-10.1183	2.09111e-36
rs509047	1.03306896e-08	-1.24191	0.999999741732827	-6.81346	8.3753517604e-06	1.02750153765351	0.999540173041589	-3.31469	-10.1282	2.07069e-36
rs2384511	1.0191104401e-08	1.37941179384058	0.999999745222455	-6.64005	8.2628652304e-06	-0.84962	0.999546346021003	-3.48832	-10.1284	2.07023e-36
rs540490	1.0321950409e-08	-1.21399	0.999999741951306	-6.84817	8.3681182729e-06	1.06082751134726	0.999540569994997	-3.28034	-10.1285	2.06995e-36
rs7599286	1.0191710116e-08	1.38031182518771	0.999999745207312	-6.63878	8.2633826521e-06	-0.844142	0.99954631762602	-3.49293	-10.1317	2.06334e-36
rs875788	1.0022812996e-08	1.16544139680764	0.999999749429738	-6.92064	8.1258633481e-06	-1.13722	0.999553864444617	-3.2111	-10.1317	2.06328e-36
rs3845685	1.03286569e-08	-1.22395	0.999999741783644	-6.83571	8.3718792964e-06	1.03766822652778	0.999540363600588	-3.30441	-10.1401	2.04607e-36
rs4665372	9.73128979729e-09	-0.0526337	0.999999756717814	-7.61314	7.86409849e-06	1.64073387298078	0.999568229956577	-2.52839	-10.1415	2.04319e-36
rs11886621	9.93799641025e-09	1.31511342719143	0.999999751550151	-6.73925	8.0652024049e-06	-0.951302	0.999557193447179	-3.4089	-10.1482	2.02969e-36
rs3910615	1.0327030884e-08	-1.22169	0.999999741824294	-6.83854	8.3702590596e-06	1.03184083729097	0.999540452514623	-3.31053	-10.1491	2.02782e-36
rs7557229	1.0326217924e-08	-1.23046	0.999999741844619	-6.82783	8.37002761e-06	1.01512218727317	0.999540465215927	-3.32765	-10.1555	2.01487e-36
rs7559046	9.85445348416e-09	0.878539855101663	0.999999753638724	-7.22232	7.98910225e-06	-1.36564	0.999561369767222	-2.93385	-10.1562	2.01349e-36
rs4665921	1.0333332409e-08	-1.23782	0.999999741666756	-6.81841	8.3759884569e-06	1.00363148856478	0.999540138101495	-3.33889	-10.1573	2.01122e-36
rs13390390	1.03306896e-08	-1.24396	0.999999741732827	-6.81092	8.3739626884e-06	0.990313707330896	0.999540249269921	-3.35228	-10.1632	1.99938e-36
rs4665411	9.77727417601e-09	0.0995264972426201	0.999999755568205	-7.60721	7.9169639641e-06	-1.61987	0.999565328695054	-2.55904	-10.1662	1.99329e-36
rs11903303	9.93751790641e-09	1.31509493204236	0.999999751562114	-6.7393	8.0648616169e-06	-0.929303	0.999557212149294	-3.4296	-10.1689	1.98802e-36
rs3843322	1.0327843876e-08	-1.22938	0.99999974180397	-6.82909	8.3709534276e-06	0.999263806225503	0.99954041440966	-3.34356	-10.1726	1.98058e-36
rs6726188	1.0613944576e-08	0.968145286535176	0.999999734651456	-7.10246	8.6057156025e-06	1.22318692369314	0.999527531488081	-3.08103	-10.1835	1.95922e-36
rs4665922	1.0327234129e-08	-1.26615	0.999999741819213	-6.78323	8.3696804416e-06	0.933440256615878	0.999540484267555	-3.40721	-10.1904	1.94563e-36
rs4665923	1.0292508304e-08	-1.19661	0.999999742687359	-6.87056	8.3423924224e-06	1.00048471083536	0.999541981759723	-3.34405	-10.2146	1.89921e-36
rs7568247	9.73647933696e-09	0.114171369038932	0.999999756588076	-7.60774	7.8877284201e-06	-1.5859	0.999566933142008	-2.61531	-10.223	1.88322e-36
rs868232	9.74336797225e-09	0.153608858406318	0.99999975641586	-7.6021	7.8941331225e-06	-1.56945	0.999566581651434	-2.64085	-10.243	1.84612e-36
rs13399667	1.0001200036e-08	0.971601703897766	0.999999749970062	-7.12884	8.1045549225e-06	-1.2139	0.999555033823898	-3.12231	-10.2511	1.83104e-36
rs9309662	9.80329693456e-09	-0.772796	0.999999754917637	-7.31223	7.9520616036e-06	1.36159279984681	0.999563402543044	-2.94169	-10.2539	1.82599e-36
rs2089628	9.74471045409e-09	0.151562118536843	0.999999756382298	-7.60235	7.8948074529e-06	-1.54604	0.999566544644143	-2.67726	-10.2796	1.77967e-36
rs7583746	9.99952000576e-09	0.967877229053497	0.999999750012062	-7.13253	8.1033023569e-06	-1.1906	0.999555102563189	-3.15039	-10.2829	1.77378e-36
rs2940787	1.0061895481e-08	-0.829754	0.999999748452676	-7.25357	8.1506824036e-06	-1.28375	0.999552502409883	-3.03229	-10.2859	1.76858e-36
rs4666076	1.0594379041e-08	0.831375997046508	0.999999735140594	-7.22644	8.5886508096e-06	1.24027857396337	0.999528467932639	-3.06098	-10.2874	1.76582e-36
rs13399788	1.0001400049e-08	0.965401421900467	0.999999749965061	-7.13483	8.1043841124e-06	-1.18728	0.99955504319775	-3.15426	-10.2891	1.76286e-36
rs4665420	1.0663040644e-08	1.02208944238926	0.999999733424055	-7.04647	8.6475400489e-06	1.06791989580606	0.999525236344576	-3.25639	-10.3029	1.73876e-36
rs7581221	9.971420449e-09	1.19122344953283	0.999999750714551	-6.89283	8.0942526016e-06	-0.946363	0.99955559920314	-3.41179	-10.3046	1.73571e-36
rs1509393	9.76106456361e-09	0.913925470226654	0.999999755973445	-7.19536	7.91634496e-06	-1.22866	0.999565362665952	-3.11602	-10.3114	1.724e-36
rs10172741	1.0005400729e-08	0.959583912343667	0.999999749865044	-7.14023	8.1081993001e-06	-1.17252	0.999554833824899	-3.17144	-10.3117	1.72352e-36
rs13420957	9.80814910321e-09	-0.841954	0.999999754796332	-7.25615	7.9407294849e-06	1.25178411103186	0.999564024446826	-3.08582	-10.342	1.67208e-36
rs10190267	9.80608926049e-09	-1.41007	0.999999754847829	-6.61655	7.9289549056e-06	0.531628217512359	0.999564670633552	-3.72845	-10.345	1.66702e-36
rs6731639	1.0620745249e-08	0.814486158145492	0.999999734481439	-7.2391	8.6101751761e-06	1.18719562691059	0.999527286765598	-3.12413	-10.3632	1.63691e-36
rs6547850	9.78953915241e-09	-0.759021	0.999999755261581	-7.32348	7.9406167681e-06	1.28360380565738	0.999564030632699	-3.04551	-10.369	1.6275e-36
rs6547851	9.78989534721e-09	-0.76085	0.999999755252676	-7.32207	7.9408422025e-06	1.27810287620433	0.999564018260909	-3.05254	-10.3746	1.61838e-36
rs13405815	9.80608926049e-09	-0.753805	0.999999754847829	-7.32658	7.9549946116e-06	1.26087588549386	0.999563241580439	-3.07351	-10.4001	1.57766e-36
rs2012704	9.71811498025e-09	0.903140073341076	0.999999757047185	-7.20737	7.8588272896e-06	-1.15084	0.999568519241407	-3.21221	-10.4196	1.54722e-36
rs2940806	9.87904796356e-09	-1.41515	0.999999753023862	-6.60566	7.9829981764e-06	0.251121957089566	0.999561704755765	-3.83479	-10.4404	1.51526e-36
rs3739086	1.0183433569e-08	-1.30791	0.999999745414226	-6.7365	8.2525776529e-06	0.530840002367086	0.99954691058133	-3.70888	-10.4454	1.50781e-36
rs13026552	1.0724052249e-08	0.89341135799608	0.999999731898766	-7.16686	8.6627205625e-06	-1.04553	0.999524403306696	-3.27917	-10.446	1.50683e-36
rs6723329	1.1530034884e-08	-0.7278	0.999999711749211	-7.26487	9.3430480896e-06	-1.09568	0.999487071436647	-3.18774	-10.4526	1.49695e-36
rs11902458	9.95417262436e-09	-0.536569	0.999999751145746	-7.45925	8.07923776e-06	1.31334435688151	0.999556423201116	-2.99827	-10.4575	1.48962e-36
rs2940797	9.86412471489e-09	-0.623901	0.999999753396943	-7.41312	7.9810770064e-06	-1.27288	0.999561810188671	-3.05667	-10.4698	1.47146e-36
rs10187742	9.78407831025e-09	-1.20729	0.999999755398102	-6.88305	7.9286733241e-06	0.742846590122133	0.999564686086703	-3.59393	-10.477	1.4609e-36
rs13406540	9.77846077321e-09	-1.00024	0.999999755538541	-7.11186	7.9161198736e-06	1.00153186710075	0.999565375018678	-3.3692	-10.4811	1.45496e-36
rs12466828	9.78704597025e-09	-1.18448	0.999999755323911	-6.91017	7.9312640625e-06	0.7528557478917	0.999564543907384	-3.58629	-10.4965	1.43273e-36
rs6547276	9.71937685161e-09	-1.28807	0.999999757015638	-6.78557	7.8712230249e-06	0.567128961316239	0.99956783896054	-3.71261	-10.4982	1.43026e-36
rs36113629	1.1129195025e-08	0.393142802976444	0.999999721770202	-7.47013	8.9934611881e-06	-1.24441	0.999506254102767	-3.03285	-10.503	1.42342e-36
rs2117275	9.72069796096e-09	-1.26432	0.99999975698261	-6.81581	7.8733554025e-06	0.60461519271548	0.999567721935249	-3.69052	-10.5063	1.41865e-36
rs10186477	9.72479988736e-09	-1.26224	0.999999756880062	-6.81823	7.8767790336e-06	0.607879396841685	0.999567534045777	-3.68832	-10.5066	1.41833e-36
rs9751762	9.72042190084e-09	-1.26573	0.999999756989512	-6.81405	7.8731870464e-06	0.593908593259965	0.999567731174663	-3.69694	-10.511	1.41205e-36
rs7606808	9.71955430884e-09	-1.2662	0.999999757011201	-6.81349	7.87251364e-06	0.592437094589778	0.999567768131333	-3.69786	-10.5114	1.41154e-36
rs10190160	9.72016556281e-09	-1.26509	0.99999975699592	-6.81487	7.8729064569e-06	0.593113722303599	0.999567746573467	-3.69743	-10.5123	1.4102e-36
rs1509394	9.844013089e-09	0.632423878972354	0.999999753899733	-7.40878	7.9814725225e-06	-1.23121	0.999561788482932	-3.1088	-10.5176	1.40277e-36
rs4665915	9.724918225e-09	-1.28927	0.999999756877104	-6.78375	7.8755441956e-06	0.522253183862255	0.999567601813894	-3.73677	-10.5205	1.39867e-36
rs4665916	9.72328128489e-09	-1.28351	0.999999756918027	-6.79123	7.8744778225e-06	0.52200702029471	0.999567660336636	-3.73696	-10.5282	1.38797e-36
rs10174300	9.715650624e-09	-1.20481	0.999999757108793	-6.88954	7.8688665225e-06	0.672502361727537	0.999567968285874	-3.64747	-10.537	1.37578e-36
rs1506536	9.70814119401e-09	0.66680266599276	0.999999757296529	-7.3934	7.8515962849e-06	-1.17991	0.999568916081073	-3.17881	-10.5722	1.3282e-36
rs9789382	9.73194088036e-09	-1.23738	0.999999756701537	-6.84894	7.88205625e-06	0.535946571682992	0.999567244431358	-3.72911	-10.578	1.32047e-36
rs6720661	9.74131494361e-09	-1.22429	0.999999756467186	-6.86457	7.88935744e-06	0.559384790657932	0.999566843741243	-3.71582	-10.5804	1.31739e-36
rs4665360	9.70291981156e-09	-1.20274	0.999999757427064	-6.89269	7.8582105625e-06	0.563824132703113	0.99956855308756	-3.7153	-10.608	1.28152e-36
rs12713989	9.76454256649e-09	-1.02643	0.999999755886495	-7.08604	7.9117313284e-06	0.830658636651284	0.999565615861777	-3.52594	-10.612	1.27641e-36
rs13391237	9.77312165281e-09	-0.988888	0.999999755672018	-7.12343	7.9146006241e-06	0.872711309534389	0.999565458394986	-3.48996	-10.6134	1.27462e-36
rs1368893	9.70823972416e-09	-1.20368	0.999999757294066	-6.89129	7.8626964025e-06	0.541042420784223	0.999568306903483	-3.7276	-10.6189	1.26763e-36
rs12624279	9.91769007376e-09	-0.564162	0.99999975205781	-7.4459	8.0356941729e-06	1.17215396175297	0.999558812832917	-3.17635	-10.6222	1.26338e-36
rs13027697	9.70124532601e-09	-1.20032	0.999999757468926	-6.89569	7.8569211204e-06	0.539471712652782	0.999568623852504	-3.72881	-10.6245	1.26053e-36
rs13027445	9.70049677921e-09	-1.20058	0.999999757487639	-6.89542	7.8561923521e-06	0.536435607533653	0.999568663847516	-3.73049	-10.6259	1.25876e-36
rs6756273	9.70171810729e-09	-1.20087	0.999999757457106	-6.895	7.8571453636e-06	0.535197248721041	0.999568611545973	-3.73109	-10.6261	1.25852e-36
rs6759346	9.70177720576e-09	-1.20086	0.999999757455629	-6.89501	7.8572014249e-06	0.535109718986683	0.999568608469313	-3.73114	-10.6261	1.25846e-36
rs3885084	9.70195450225e-09	-1.19936	0.999999757451196	-6.8968	7.8575938596e-06	0.537718415776593	0.999568586932386	-3.72971	-10.6265	1.258e-36
rs4513248	9.70686034756e-09	-1.18635	0.99999975732855	-6.91207	7.8611822884e-06	0.564841036029931	0.999568389998448	-3.71454	-10.6266	1.25788e-36
rs6547266	9.70236820036e-09	-1.20098	0.999999757440854	-6.89484	7.8576499225e-06	0.532822003817134	0.999568583855639	-3.73233	-10.6272	1.25718e-36
rs3885083	9.70228940004e-09	-1.19806	0.999999757442824	-6.89834	7.8578741761e-06	0.537940703270203	0.999568571548539	-3.72958	-10.6279	1.25623e-36
rs1072138	9.70213180036e-09	-1.19891	0.999999757446764	-6.89733	7.8575938596e-06	0.534818096848534	0.999568586932386	-3.73127	-10.6286	1.25538e-36
rs10211107	9.70366845184e-09	-1.20087	0.999999757408348	-6.8949	7.8587712225e-06	0.528728128845845	0.999568522318385	-3.73443	-10.6293	1.25446e-36
rs1897770	9.705008196e-09	-1.19982	0.999999757374854	-6.89609	7.8599486736e-06	0.530168785401418	0.999568457699552	-3.73359	-10.6297	1.25402e-36
rs1560860	9.70615099204e-09	-1.20077	0.999999757346284	-6.89489	7.8606215424e-06	0.527610140957599	0.999568420772335	-3.7349	-10.6298	1.25388e-36
rs7608167	9.70447622769e-09	-1.20036	0.999999757388153	-6.89547	7.8593319025e-06	0.528819846974264	0.999568491548115	-3.73435	-10.6298	1.25385e-36
rs6547253	9.70634803264e-09	-1.19825	0.999999757341358	-6.8979	7.8610701376e-06	0.529831369304077	0.999568396153313	-3.7337	-10.6316	1.25162e-36
rs6547255	9.70591454596e-09	-1.19869	0.999999757352195	-6.8974	7.8606776161e-06	0.52888514778738	0.999568417694995	-3.73423	-10.6316	1.25158e-36
rs6720567	9.70814119401e-09	-1.20142	0.999999757296529	-6.89401	7.8623599201e-06	0.521834956615395	0.999568325369721	-3.73782	-10.6318	1.25133e-36
rs4665913	9.707175625e-09	-1.19496	0.999999757320668	-6.9018	7.8615187456e-06	0.521859307235791	0.999568371533591	-3.73786	-10.6397	1.24156e-36
rs6547245	9.76614344644e-09	-0.97957	0.999999755846473	-7.13296	7.9125189264e-06	0.850152155055956	0.999565572638437	-3.50952	-10.6425	1.23808e-36
rs999087	9.792487849e-09	-1.08961	0.999999755187864	-7.01776	7.9344185761e-06	0.698875678515768	0.999564370788225	-3.62525	-10.643	1.23742e-36
rs1881254	9.77201446225e-09	-0.932989	0.999999755699698	-7.1772	7.9133065636e-06	0.898391786879768	0.999565529412949	-3.46731	-10.6445	1.23556e-36
rs12713986	9.79650591529e-09	-1.06377	0.999999755087412	-7.04538	7.9375173696e-06	0.727021040974529	0.999564200727034	-3.605	-10.6504	1.22833e-36
rs12993356	9.79678305369e-09	-1.0634	0.999999755080484	-7.04576	7.9376864121e-06	0.72743212689759	0.999564191450016	-3.60469	-10.6504	1.22825e-36
rs10170963	9.70814119401e-09	-1.19363	0.999999757296529	-6.90334	7.8628085649e-06	0.499160149354331	0.999568300747982	-3.74936	-10.6527	1.22548e-36
rs6705073	9.70967832129e-09	-1.19311	0.999999757258101	-6.90388	7.8640424041e-06	0.498628886456108	0.999568233034585	-3.74955	-10.6534	1.22459e-36
rs7606480	9.90610146436e-09	-0.540821	0.999999752347525	-7.45938	8.0263422864e-06	1.15058875852429	0.999559326057292	-3.20197	-10.6613	1.21494e-36
rs1368886	9.76434493609e-09	-1.02913	0.999999755891436	-7.08327	7.9088063076e-06	0.764943497400667	0.999565776386808	-3.57853	-10.6618	1.21437e-36
rs4665354	9.71586747481e-09	-1.17805	0.999999757103372	-6.92142	7.8670152324e-06	0.497818041799474	0.999568069885078	-3.74977	-10.6712	1.20304e-36
rs7580239	9.77517803025e-09	-0.989175	0.999999755620609	-7.12304	7.9203970624e-06	0.794902498649763	0.999565140286923	-3.55445	-10.6775	1.19548e-36
rs7607528	9.776067876e-09	-0.989438	0.999999755598363	-7.12273	7.9210725136e-06	0.791990591378747	0.999565103218229	-3.55671	-10.6794	1.19314e-36
rs17006979	9.77575148176e-09	-0.947285	0.999999755606273	-7.16357	7.9155009025e-06	0.84007890668041	0.999565408987768	-3.51784	-10.6814	1.1908e-36
rs4617998	9.70552047556e-09	-0.292392	0.999999757362047	-7.5731	7.8731870464e-06	1.23296815304784	0.999567731174663	-3.11345	-10.6866	1.18469e-36
rs13410956	9.89424111204e-09	-1.16389	0.999999752644033	-6.9289	8.0125228096e-06	-0.459398	0.999560084460569	-3.75899	-10.6879	1.18311e-36
rs6716018	9.800802001e-09	-1.05333	0.99999975498001	-7.05621	7.9401095524e-06	0.686062275092093	0.999564058468585	-3.63376	-10.69	1.18065e-36
rs13014805	9.75397214884e-09	-0.968461	0.999999756150756	-7.1444	7.9026767689e-06	0.806009597427406	0.999566112775829	-3.54668	-10.6911	1.17934e-36
rs13016313	9.75371536881e-09	-0.968	0.999999756157175	-7.14486	7.9025080996e-06	0.805573539560463	0.999566122032402	-3.54704	-10.6919	1.17838e-36
rs12105076	9.76082744961e-09	-0.960111	0.999999755979373	-7.1521	7.9085250841e-06	0.813826136739433	0.999565791820346	-3.53998	-10.6921	1.17816e-36
rs12997128	9.75385363456e-09	-0.968475	0.999999756153719	-7.14439	7.9025080996e-06	0.80434627944535	0.999566122032402	-3.54803	-10.6924	1.17776e-36
rs13016101	9.75614503824e-09	-0.9653	0.999999756096434	-7.14734	7.9047571716e-06	0.804406126179958	0.999565998603325	-3.54784	-10.6952	1.17451e-36
rs6547246	9.75503880976e-09	-0.963596	0.999999756124089	-7.14904	7.9035201424e-06	0.806503706443948	0.999566066491487	-3.54623	-10.6953	1.17441e-36
rs9309551	9.75403140625e-09	-0.965398	0.999999756149274	-7.14736	7.9026767689e-06	0.801118395543493	0.999566112775829	-3.55061	-10.698	1.17125e-36
rs6707375	9.77818389409e-09	-0.943102	0.999999755545462	-7.1674	7.9217479936e-06	0.822210221135808	0.999565066147957	-3.53229	-10.6997	1.16923e-36
rs4665912	9.74992331889e-09	-0.967602	0.999999756251976	-7.14544	7.8993037249e-06	0.795472092849493	0.999566297888546	-3.55533	-10.7008	1.16798e-36
rs9309550	9.75446596609e-09	-0.967439	0.99999975613841	-7.14536	7.9031265625e-06	0.79467140951534	0.999566088091153	-3.55572	-10.7011	1.1676e-36
rs10202201	9.75409066384e-09	-0.965553	0.999999756147793	-7.14721	7.9027892161e-06	0.794980061824352	0.999566106604726	-3.5555	-10.7027	1.16571e-36
rs4665425	9.77628540001e-09	-0.880482	0.999999755592925	-7.22459	7.9176392689e-06	0.879360160350839	0.999565291634381	-3.48395	-10.7085	1.15893e-36
rs2940801	1.0119152836e-08	1.09238125534326	0.999999747021243	-6.99833	8.1900137124e-06	-0.526144	0.999550343970775	-3.71516	-10.7135	1.1532e-36
rs12998045	9.99004248004e-09	-1.12498	1	-6.96861	8.0897580625e-06	-0.456641	0.999555845858355	-3.75546	-10.7241	1.14107e-36
rs7602471	9.75997781476e-09	-0.878649	0.999999756000614	-7.22704	7.9067253721e-06	0.852515567820932	0.999565890588502	-3.50787	-10.7349	1.12876e-36
rs1821410	9.73906475689e-09	-0.89965	0.99999975652344	-7.20944	7.8900315664e-06	0.818976688549336	0.999566806745128	-3.53695	-10.7464	1.11589e-36
rs6547254	9.74319029776e-09	-0.899733	0.999999756420302	-7.20915	7.8933464401e-06	0.818078597335478	0.999566624824613	-3.53747	-10.7466	1.11562e-36
rs9789358	9.73973583801e-09	-0.901138	0.999999756506663	-7.20806	7.8906495409e-06	0.81672321050327	0.999566772830637	-3.53875	-10.7468	1.11541e-36
rs2972050	1.0630022404e-08	1.09401369517565	0.99999973424951	-6.97192	8.6014331524e-06	-0.312423	0.999527766490891	-3.78024	-10.7522	1.10946e-36
rs6743539	9.74155182049e-09	-0.899445	0.999999756461264	-7.20949	7.8921103041e-06	0.809161745494413	0.999566692663841	-3.5448	-10.7543	1.10709e-36
rs12469703	9.75012080329e-09	-0.910494	0.999999756247039	-7.19906	7.8984605764e-06	0.791319446915408	0.999566344160562	-3.55867	-10.7577	1.1033e-36
rs1368890	9.72898158736e-09	-1.10319	0.99999975677552	-7.00612	7.8791367204e-06	0.492369022935682	0.999567404655554	-3.75169	-10.7578	1.1032e-36
rs6547275	9.75389313924e-09	-0.912086	0.999999756152731	-7.19741	7.9015523409e-06	0.787955759044031	0.999566174484451	-3.56113	-10.7585	1.1024e-36
rs4665359	9.73829501584e-09	-0.899249	0.999999756542684	-7.20984	7.8891889129e-06	0.803885686617274	0.999566852990026	-3.54924	-10.7591	1.10181e-36
rs6547274	9.75440670736e-09	-0.911831	0.999999756139892	-7.19762	7.9018334404e-06	0.78621283377564	0.999566159057706	-3.56249	-10.7601	1.10068e-36
rs11894681	9.75146375025e-09	-0.90552	0.999999756213466	-7.2035	7.8999220624e-06	0.777765522933952	0.999566263954168	-3.56921	-10.7727	1.08689e-36
rs1368892	9.75902942884e-09	-0.868017	0.999999756024324	-7.23637	7.9066128969e-06	0.78362086440696	0.999565896761139	-3.56422	-10.8006	1.05701e-36
rs12475388	9.81266566921e-09	0.581345038154068	0.999999754683419	-7.44138	7.9374046756e-06	-0.97903	0.999564206911658	-3.39013	-10.8315	1.02483e-36
rs6547250	9.75106875625e-09	-0.862382	0.999999756223341	-7.24166	7.9003155625e-06	0.734412523347861	0.999566242358873	-3.60195	-10.8436	1.01251e-36
rs13007288	1.0646525124e-08	-0.856568	0.999999733836943	-7.20272	8.6262627025e-06	-0.6057	0.999526403951383	-3.64423	-10.847	1.00912e-36
rs28740870	1.0232940964e-08	0.955419245141264	0.999999744176541	-7.13298	8.27943076e-06	-0.503663	0.999545436941385	-3.72131	-10.8543	1.00175e-36
rs12988023	1.0653955524e-08	-0.836085	0.999999733651183	-7.21971	8.6315502025e-06	-0.615531	0.999526113796478	-3.63792	-10.8576	9.98404e-37
rs6708798	1.1368250884e-08	-0.689113	0.999999715793809	-7.29934	9.2118927121e-06	-0.679596	0.999494268158364	-3.56394	-10.8633	9.92774e-37
rs6547853	1.0297987441e-08	0.415365740695119	0.99999974255038	-7.49996	8.35903744e-06	-0.952528	0.99954106832596	-3.38986	-10.8898	9.66786e-37
rs1039823	9.72233468361e-09	-0.46043	0.999999756941692	-7.50898	7.8859310761e-06	0.977081322844964	0.999567031780433	-3.39529	-10.9043	9.5291e-37
rs10199829	1.0032225921e-08	0.0353866275296772	0.999999749194415	-7.59867	8.1377831824e-06	-1.02926	0.999553210300472	-3.32726	-10.9259	9.32498e-37
rs2337699	9.812685481e-09	0.946514703358604	0.999999754682923	-7.16241	7.929856e-06	-0.415643	0.999564621181629	-3.78331	-10.9457	9.14222e-37
rs6717682	1.0041042025e-08	0.96038620827304	0.999999748974012	-7.13768	8.1550796041e-06	-0.120713	0.999552261098114	-3.84837	-10.9861	8.78082e-37
rs57552523	1.0438504561e-08	0.556868521762961	0.999999739037454	-7.42439	8.4427438096e-06	0.73526658498644	0.999536474771014	-3.56814	-10.9925	8.72407e-37
rs72802746	1.0451995225e-08	0.550940480266054	0.999999738700188	-7.42703	8.4529166121e-06	0.727834930986211	0.999535916520948	-3.57297	-11	8.65914e-37
rs4666068	9.69317042521e-09	-0.310153	0.999999757670798	-7.56839	7.8661738089e-06	0.93152492093544	0.999568116062589	-3.43999	-11.0084	8.58691e-37
rs1509396	9.83187267364e-09	0.0320965591523643	0.999999754203244	-7.60887	7.9712487556e-06	-0.961634	0.999562349558804	-3.40488	-11.0137	8.541e-37
rs10186460	1.0466517636e-08	0.871453287197232	0.999999738337127	-7.19839	8.4528003169e-06	0.20338828563272	0.999535922902844	-3.81706	-11.0154	8.52647e-37
rs57372210	1.04489284e-08	0.350568381921346	0.999999738776858	-7.5175	8.4518699841e-06	0.80952184396724	0.999535973956434	-3.51027	-11.0278	8.42202e-37
rs11884420	1.0450563984e-08	0.5044058379309	0.999999738735969	-7.45165	8.4529166121e-06	0.708525516012644	0.999535916520948	-3.58684	-11.0385	8.33223e-37
rs906805	1.0012603969e-08	0.368339945834125	0.999999749684963	-7.53244	8.11908036e-06	-0.833888	0.999554236686075	-3.51033	-11.0428	8.29666e-37
rs12714237	1.1022060196e-08	-0.600115	0.999999724448571	-7.37218	8.8849897929e-06	0.527732767036705	0.999512206336319	-3.67363	-11.0458	8.27152e-37
rs1368888	1.00440484e-08	0.888432448613051	0.999999748898853	-7.20405	8.1565646409e-06	-0.147266	0.999552179601547	-3.84472	-11.0488	8.24702e-37
rs10196039	9.82186048809e-09	0.285678969742284	0.999999754453548	-7.56908	7.9397150625e-06	-0.868541	0.999564080118106	-3.49201	-11.0611	8.14601e-37
rs12713992	1.0062697969e-08	0.862340873067299	0.999999748432614	-7.22596	8.1713652736e-06	-0.12958	0.999551367366007	-3.84626	-11.0722	8.05584e-37
rs1881252	1.0640335104e-08	0.0822730533581511	0.999999733991693	-7.56648	8.6245592976e-06	0.800552309347717	0.999526497426839	-3.50739	-11.0739	8.04258e-37
rs4341890	1.1503635025e-08	-0.418753	0.999999712409207	-7.44319	9.3217249225e-06	-0.549544	0.999488241468539	-3.63791	-11.0811	7.9847e-37
rs6710065	1.0057883521e-08	0.837910438831776	0.999999748552975	-7.24697	8.16702084e-06	-0.0959966	0.999551605781581	-3.85031	-11.0973	7.85647e-37
rs6753540	1.0063299856e-08	0.83106782567088	0.999999748417567	-7.25241	8.1714796164e-06	-0.0974277	0.999551361091059	-3.8499	-11.1023	7.81705e-37
rs112523561	1.0064303041e-08	0.829129494323223	0.999999748392487	-7.25397	8.1722800384e-06	-0.0949733	0.999551317165191	-3.85009	-11.1041	7.80342e-37
rs6756245	1.0067914921e-08	0.825118847108303	0.99999974830219	-7.25711	8.1758824225e-06	-0.0885299	0.999551119472214	-3.85046	-11.1076	7.77609e-37
rs13029206	1.0058284681e-08	0.822786690729976	0.999999748542946	-7.25951	8.1679925209e-06	-0.0877749	0.999551552457276	-3.85101	-11.1105	7.75319e-37
rs6722906	1.0062697969e-08	0.816486397575588	0.999999748432614	-7.26445	8.1714224449e-06	-0.0955506	0.999551364228538	-3.85009	-11.1145	7.72206e-37
rs41448746	1.0062697969e-08	0.815147588049405	0.999999748432614	-7.26554	8.17159396e-06	-0.0851697	0.999551354816066	-3.85101	-11.1166	7.70649e-37
rs13414801	1.0900821649e-08	-0.244299	0.999999727479533	-7.52794	8.8067684644e-06	-0.675548	0.999516498678897	-3.58916	-11.1171	7.70238e-37
rs4552148	1.0062296721e-08	0.810955927066822	0.999999748442645	-7.26897	8.1713081025e-06	-0.0897049	0.999551370503465	-3.85063	-11.1196	7.68302e-37
rs11887277	1.0066510224e-08	0.811474903320974	0.999999748337308	-7.26834	8.1751390084e-06	-0.0742954	0.999551160269563	-3.85166	-11.12	7.67996e-37
rs4522560	9.73119115024e-09	0.340706439539853	0.99999975672028	-7.55649	7.8582666276e-06	-0.768152	0.999568550010692	-3.57928	-11.1358	7.55989e-37
rs10173528	1.0204232256e-08	0.66941969588976	0.999999744894259	-7.36673	8.2636126225e-06	-0.395631	0.999546305005742	-3.77082	-11.1375	7.54641e-37
rs13010712	1.0075341376e-08	0.776711564517415	0.999999748116529	-7.29551	8.1822314116e-06	0.0282992945190634	0.999550771050214	-3.85359	-11.1491	7.45976e-37
rs12473028	1.0038637249e-08	-0.746104	0.999999749034132	-7.32064	8.1527951961e-06	0.209600358630061	0.999552386462984	-3.83383	-11.1545	7.41977e-37
rs10209559	1.0641366649e-08	0.420375737952829	0.999999733965905	-7.48146	8.6063609956e-06	0.552640728646128	0.999527496071638	-3.6761	-11.1576	7.39689e-37
rs11682011	1.0561056289e-08	0.423063823990191	0.999999735973662	-7.48412	8.5426429284e-06	0.54616495254518	0.999530992661736	-3.68337	-11.1675	7.32385e-37
rs7355704	1.0686804129e-08	0.134326784487845	0.999999732829968	-7.55867	8.6376034404e-06	0.654502582528632	0.999525781621429	-3.61284	-11.1715	7.29447e-37
rs7558946	1.0093417156e-08	0.293578922222443	0.999999747664635	-7.55316	8.1657063049e-06	0.686887810272364	0.99955167792119	-3.6192	-11.1724	7.28825e-37
rs11127150	9.74293365969e-09	-0.407021	0.999999756426718	-7.53109	7.8925597969e-06	0.671431673293301	0.999566667995644	-3.64669	-11.1778	7.24882e-37
rs827884	1.0095627529e-08	0.731360410840292	0.999999747609376	-7.3287	8.2010067876e-06	-0.00741429	0.999549740690116	-3.85282	-11.1815	7.2218e-37
rs4666070	9.71714891536e-09	-0.0204141	0.999999757071336	-7.61504	7.8828423696e-06	0.776602413414825	0.999567201289011	-3.57119	-11.1862	7.18781e-37
rs12995493	9.79698101209e-09	-0.735984	0.999999755075535	-7.34032	7.9290675396e-06	-0.200939	0.999564664452215	-3.84952	-11.1898	7.16195e-37
rs13395259	1.0088997136e-08	0.334107562422843	0.999999747775135	-7.54066	8.1638204176e-06	0.635704386050874	0.999551781415722	-3.65315	-11.1938	7.13361e-37
rs11677002	9.81547914361e-09	-0.149221	0.999999754613082	-7.59908	7.9585487881e-06	0.720728512737984	0.999563046528362	-3.60823	-11.2073	7.03789e-37
rs7602515	1.1077352001e-08	-0.475285	0.999999723066277	-7.4368	8.9657127184e-06	-0.26563	0.999507776758948	-3.77303	-11.2098	7.02024e-37
rs925255	9.81211094721e-09	-0.152159	0.999999754697286	-7.59881	7.9555587136e-06	0.709756218623252	0.999563210622696	-3.61626	-11.2151	6.98348e-37
rs562311	1.0086787489e-08	0.678595680702558	0.999999747830376	-7.36634	8.1969407809e-06	-0.0127194	0.999549963825338	-3.85301	-11.2193	6.9537e-37
rs11679638	1.0644874276e-08	0.223289782309497	0.999999733878214	-7.54473	8.6104686096e-06	0.548388745757167	0.999527270663216	-3.6782	-11.2229	6.92885e-37
rs13007201	9.78295071744e-09	-0.704095	0.999999755426292	-7.364	7.918596e-06	-0.0889254	0.999565239129059	-3.86641	-11.2304	6.87723e-37
rs13415164	1.0583265625e-08	0.184381044957473	0.999999735418429	-7.55556	8.5619441664e-06	0.557841890857393	0.999529933485191	-3.6758	-11.2314	6.87068e-37
rs6757405	1.0629197604e-08	0.154926380725135	0.99999973427013	-7.55839	8.5984419361e-06	0.547479632098925	0.999527930636298	-3.6794	-11.2378	6.82664e-37
rs527267	1.0171529316e-08	0.541221964423821	0.999999745711832	-7.44594	8.2636126225e-06	0.334545075052615	0.999546305005742	-3.79311	-11.239	6.81806e-37
rs3863	1.0641160336e-08	0.206928341540967	0.999999733971062	-7.54842	8.6068303876e-06	0.515386503234779	0.999527470313392	-3.69596	-11.2444	6.78181e-37
rs471905	1.0078754449e-08	0.584056657336667	0.999999748031202	-7.42642	8.18932689e-06	0.151413495474718	0.999550381662406	-3.8421	-11.2685	6.62005e-37
rs13418647	1.01485476e-08	0.38691681556482	0.999999746286374	-7.51868	8.2320217225e-06	-0.448987	0.99954803864889	-3.75021	-11.2689	6.61762e-37
rs4665919	1.0102461121e-08	0.539618549213519	0.999999747438536	-7.45021	8.2071936324e-06	0.255239770736032	0.999549401167261	-3.81991	-11.2701	6.60946e-37
rs486582	1.01143249e-08	0.575605051208114	0.999999747141942	-7.42956	8.2188289225e-06	0.125739400387185	0.999548762644204	-3.84386	-11.2734	6.58771e-37
rs13405539	1.0137670596e-08	0.385057505512186	0.999999746558299	-7.51993	8.2233591696e-06	-0.427529	0.999548514032898	-3.76013	-11.2801	6.54405e-37
rs502751	1.0083774724e-08	0.576968272620447	0.999999747905695	-7.43029	8.1916736521e-06	0.0783719004510658	0.999550252876153	-3.85034	-11.2806	6.54036e-37
rs12991828	1.0161244809e-08	0.362023947699969	0.999999745968944	-7.52737	8.2429281025e-06	-0.431051	0.99954744012867	-3.75743	-11.2848	6.51308e-37
rs6705961	9.98334693889e-09	0.224060642515215	0.999999750416389	-7.57663	8.07810084e-06	0.536521004855394	0.999556485594089	-3.71653	-11.2932	6.45891e-37
rs4665918	1.0099848004e-08	0.507249895520309	0.999999747503864	-7.46728	8.20478736e-06	0.213047060466415	0.999549533219112	-3.82993	-11.2972	6.43279e-37
rs111723669	1.0158019369e-08	0.203944953218173	0.99999974604958	-7.57227	8.2371870025e-06	-0.452539	0.999547755188613	-3.74829	-11.3206	6.28434e-37
rs12470698	9.92378577124e-09	0.352716672254668	0.999999751905417	-7.54252	8.0384157441e-06	0.39207677738157	0.999558663475271	-3.78602	-11.3285	6.23435e-37
rs12474330	9.92380569489e-09	0.352683191742883	0.999999751904919	-7.54253	8.0384157441e-06	0.3919674380381	0.999558663475271	-3.78607	-11.3286	6.23401e-37
rs12989446	1.0175362129e-08	0.311811882267802	0.999999745616011	-7.5436	8.2554506329e-06	-0.339416	0.999546752918247	-3.79196	-11.3356	6.19079e-37
rs12615509	1.0127201956e-08	0.45980086253155	0.999999746820015	-7.48887	8.2280627716e-06	-0.0280075	0.999548255908338	-3.85081	-11.3397	6.16533e-37
rs4666044	1.0097838144e-08	-0.22048	0.99999974755411	-7.57173	8.1666207529e-06	0.406668929534981	0.999551627737728	-3.77229	-11.344	6.13863e-37
rs12992813	1.01969604e-08	0.23835908100614	0.999999745076055	-7.56274	8.2764385344e-06	-0.34191	0.999545601147984	-3.78984	-11.3526	6.08627e-37
rs6720083	1.0248930169e-08	0.101461916097869	0.999999743776811	-7.58346	8.2934208289e-06	0.387383977526451	0.999544669198641	-3.77224	-11.3557	6.06731e-37
rs935018	1.0093417156e-08	0.420182947464814	0.999999747664635	-7.50798	8.1992886336e-06	0.0997688095437655	0.999549834979342	-3.84797	-11.356	6.06583e-37
rs828264	1.00020001e-08	0.234146585341466	0.99999974995006	-7.57339	8.1044410489e-06	0.347687779038439	0.999555040073144	-3.79835	-11.3717	5.97082e-37
rs828266	9.99810009025e-09	0.264041083902971	0.99999975004756	-7.56614	8.1012529129e-06	0.326538592614193	0.999555215034228	-3.80567	-11.3718	5.97039e-37
rs828261	1.0002600169e-08	0.209136812214412	0.999999749935058	-7.5789	8.1050104249e-06	0.360953729104685	0.999555008826477	-3.79361	-11.3725	5.96616e-37
rs4665906	1.0005800841e-08	0.243808295594278	0.999999749855042	-7.57089	8.1071742361e-06	0.336988596254008	0.999554890079153	-3.80184	-11.3727	5.96489e-37
rs828265	9.99746016129e-09	0.251718968308975	0.999999750063559	-7.56935	8.1010821376e-06	0.330204410028669	0.999555224406173	-3.80448	-11.3738	5.95836e-37
rs1368889	1.0181819025e-08	0.278754273821912	0.999999745454589	-7.55304	8.2603358464e-06	-0.232314	0.999546484828147	-3.82227	-11.3753	5.94952e-37
rs12714228	1.0125189376e-08	-0.221023	0.99999974687033	-7.57026	8.1882967104e-06	0.306948405043473	0.999550438196895	-3.80653	-11.3768	5.94074e-37
rs2196150	1.0229097321e-08	0.109327756849484	0.999999744272632	-7.5836	8.2819055089e-06	-0.329973	0.999545301132782	-3.79352	-11.3771	5.93875e-37
rs4665905	1.0007601444e-08	0.239483996081489	0.999999749810027	-7.57185	8.10711729e-06	0.326033786394128	0.999554893204285	-3.80547	-11.3773	5.93758e-37
rs828259	1.0001400049e-08	0.233346665733399	0.999999749965061	-7.57361	8.1034162225e-06	0.30570705917482	0.999555096314382	-3.81212	-11.3857	5.88787e-37
rs13007156	1.0007801521e-08	0.205643798918422	0.999999749805025	-7.57937	8.1068895076e-06	0.321390038141933	0.999554905704705	-3.80699	-11.3864	5.88416e-37
rs828270	1.0051065025e-08	0.244458630492245	0.999999748723438	-7.56848	8.1437749129e-06	0.271525687433639	0.99955288148285	-3.8195	-11.388	5.87466e-37
rs3769126	1.0007201296e-08	0.170871486264945	0.99999974982003	-7.58594	8.1066047841e-06	0.330841068976296	0.999554921329983	-3.80393	-11.3899	5.86352e-37
rs1443702	1.0073133225e-08	-0.253432	0.999999748171733	-7.56515	8.1607920241e-06	-0.238336	0.999551947609244	-3.82691	-11.3921	5.85072e-37
rs13409819	9.95734558225e-09	0.349040200828769	0.999999751066422	-7.54213	8.0523710289e-06	-0.153765	0.999557897621129	-3.85017	-11.3923	5.84933e-37
rs828257	1.0025015625e-08	0.234312109862672	0.999999749374672	-7.5722	8.1239250625e-06	0.264756775721428	0.999553970815151	-3.82253	-11.3947	5.83508e-37
rs35628191	1.0068717649e-08	0.195210428231167	0.999999748282122	-7.57842	8.1575928225e-06	0.279754914832904	0.999552123176509	-3.81638	-11.3948	5.83465e-37
rs2252860	1.0002600169e-08	0.222186115804945	0.999999749935058	-7.57609	8.1050673636e-06	0.279956022957983	0.999555005701751	-3.81955	-11.3956	5.82977e-37
rs2120356	1.0067914921e-08	-0.251255	0.99999974830219	-7.56595	8.156736e-06	-0.222242	0.999552170197621	-3.83086	-11.3968	5.82293e-37
rs34995758	1.0006401024e-08	0.180436260396673	0.999999749840037	-7.5843	8.1068325625e-06	0.3002922117833	0.999554908829783	-3.81355	-11.3979	5.81691e-37
rs828255	1.0001800081e-08	0.207805297523223	0.99999974995506	-7.57922	8.1040994329e-06	0.281146000555015	0.999555058820618	-3.81928	-11.3985	5.81313e-37
rs12478975	1.0009002025e-08	0.160682692788245	0.999999749775012	-7.58754	8.1078006564e-06	0.308222180078808	0.999554855701975	-3.81108	-11.3986	5.81244e-37
rs11678839	1.00661089e-08	-0.228324	0.999999748347341	-7.57154	8.1542229136e-06	-0.235175	0.999552308111994	-3.82806	-11.3996	5.80673e-37
rs870535	1.0067312896e-08	0.184836947855207	0.999999748317241	-7.58047	8.1539373601e-06	0.266069808895784	0.99955232378274	-3.82034	-11.4008	5.79975e-37
rs7562914	9.87825283236e-09	0.0612498918395724	0.99999975304374	-7.60515	7.97723536e-06	-0.376795	0.999562021016487	-3.79571	-11.4009	5.79941e-37
rs4665904	1.0007201296e-08	0.178572713823024	0.99999974982003	-7.5846	8.1074589696e-06	0.28879980051697	0.999554874453328	-3.81689	-11.4015	5.79578e-37
rs2304337	1.0011603364e-08	0.193596713905935	0.999999749709979	-7.58158	8.1109900804e-06	0.272814766957633	0.999554680670333	-3.82116	-11.4027	5.78851e-37
rs4665900	1.0055476729e-08	0.231503734655006	0.999999748613145	-7.57134	8.1446881321e-06	0.218223547508839	0.999552831366702	-3.83249	-11.4038	5.78226e-37
rs11126681	1.0073936161e-08	0.186535683328518	0.999999748151659	-7.57982	8.1591923449e-06	0.250286896580697	0.999552035397171	-3.82409	-11.4039	5.78176e-37
rs67579577	9.99110198025e-09	-0.254595	0.999999750222513	-7.56894	8.0871415641e-06	0.214315403036089	0.99955598944888	-3.83688	-11.4058	5.77078e-37
rs35277048	1.0007801521e-08	0.151044092803807	0.999999749805025	-7.58911	8.1073450756e-06	0.278847626205511	0.999554880703691	-3.81972	-11.4088	5.7534e-37
rs13018103	1.0008801936e-08	0.137705409619767	0.999999749780014	-7.59098	8.1078576049e-06	0.285224922122756	0.999554852576711	-3.81789	-11.4089	5.75314e-37
rs7586655	9.90176245776e-09	-0.116912	1	-7.599	8.0002991104e-06	-0.316978	0.999560755289641	-3.81501	-11.414	5.72364e-37
rs2384412	1.0035030625e-08	0.182112303468929	0.999999749124297	-7.58257	8.1295695376e-06	0.223134495868464	0.999553661053932	-3.83233	-11.4149	5.71856e-37
rs3845684	1.0016606889e-08	0.151654127074528	0.999999749584891	-7.58857	8.1157753924e-06	0.235523128874411	0.999554418058447	-3.83034	-11.4189	5.69567e-37
rs12473482	1.0033427889e-08	0.158452384517855	0.999999749164366	-7.58668	8.1290563225e-06	0.221864160075759	0.99955368921848	-3.83265	-11.4193	5.69332e-37
rs1275935	1.00741369e-08	-0.221939	0.999999748146641	-7.57258	8.1626204209e-06	-0.101898	0.999551847269666	-3.85	-11.4226	5.67483e-37
rs55826602	9.89276901376e-09	-0.116601	0.999999752680836	-7.5995	7.9918724601e-06	-0.288421	0.999561217739535	-3.82418	-11.4237	5.66863e-37
rs9941696	9.87080003361e-09	-0.0471097	0.99999975323006	-7.6063	7.9717569649e-06	-0.312629	0.999562321668484	-3.81817	-11.4245	5.66417e-37
rs35103404	1.0055476729e-08	0.175777097440091	0.999999748613145	-7.58269	8.1455443216e-06	0.161566060741966	0.999552784380266	-3.84319	-11.4259	5.65615e-37
rs12465368	1.0065306276e-08	0.136864820684568	0.999999748367406	-7.58828	8.1540515809e-06	0.189807146133993	0.999552317514475	-3.83771	-11.426	5.65551e-37
rs13026040	1.0062497344e-08	0.17791590238456	0.99999974843763	-7.58196	8.1520528324e-06	0.145255290384494	0.999552427202793	-3.84529	-11.4273	5.64838e-37
rs67864795	1.0084979776e-08	0.199294989245599	0.999999747875569	-7.57681	8.1697073929e-06	0.0816924223393871	0.999551458347838	-3.85142	-11.4282	5.64285e-37
rs13033077	9.88477385284e-09	-0.128962	0.999999752880715	-7.59838	7.9854282225e-06	-0.267536	0.999561571396009	-3.83038	-11.4288	5.63983e-37
rs57865413	9.88193058241e-09	-0.091445	0.999999752951797	-7.60266	7.9846935184e-06	-0.282417	0.999561611716211	-3.82634	-11.429	5.63851e-37
rs7560847	9.87407891856e-09	-0.0597143	0.999999753148088	-7.60546	7.9822635841e-06	-0.292628	0.999561745069842	-3.82356	-11.429	5.63844e-37
rs2178197	9.93787678321e-09	0.130216102294237	0.999999751553142	-7.59554	8.0265689344e-06	-0.243816	0.999559313619017	-3.83388	-11.4294	5.63615e-37
rs12465677	1.0081164025e-08	0.187878093720432	0.999999747970963	-7.57921	8.1667350625e-06	0.0650144344326831	0.999551621464598	-3.85282	-11.432	5.62143e-37
rs7595739	9.92737235044e-09	0.111630110341422	0.999999751815753	-7.59832	8.0216967076e-06	-0.238285	0.999559581003298	-3.83551	-11.4338	5.61134e-37
rs9678851	9.88721979025e-09	-0.0879532	0.999999752819566	-7.60271	7.9887630736e-06	-0.252502	0.999561388381049	-3.83408	-11.4368	5.59477e-37
rs11692692	9.86420416969e-09	0.0111563079258992	0.999999753394957	-7.60768	7.97328169e-06	-0.273287	0.9995622379922	-3.82959	-11.4373	5.59209e-37
rs7382	9.88358082244e-09	-0.098447	0.999999752910541	-7.60191	7.9853717056e-06	-0.238802	0.999561574497628	-3.83766	-11.4396	5.57922e-37
rs34736994	9.90486733824e-09	0.173688145075721	0.999999752378378	-7.5906	8.0238493696e-06	0.154345769317668	0.999559462866748	-3.85185	-11.4425	5.56318e-37
rs10201652	9.92223178816e-09	0.0954678427152185	0.999999751944267	-7.60025	8.0159765625e-06	-0.205606	0.999559894920904	-3.84312	-11.4434	5.55807e-37
rs12992179	9.90227990404e-09	0.169568546741942	0.999999752443064	-7.59144	8.02192329e-06	0.149382480669421	0.999559568568617	-3.85273	-11.4442	5.55367e-37
rs2082610	9.89949381444e-09	0.191725915160579	0.999999752512716	-7.58757	8.0187514276e-06	0.118565616899857	0.999559742638202	-3.85705	-11.4446	5.55111e-37
rs66630757	9.89847897921e-09	0.17481463166052	0.999999752538087	-7.59072	8.0189779684e-06	0.140176143626977	0.9995597302058	-3.85424	-11.445	5.54921e-37
rs4513249	1.0010202601e-08	0.0617936852205375	0.999999749744998	-7.59848	8.1015944689e-06	0.156299164186865	0.999555196290041	-3.84673	-11.4452	5.54784e-37
rs36057168	1.0013804761e-08	0.0631966942809462	0.999999749654944	-7.59822	8.1044979856e-06	0.145597574854927	0.999555036948526	-3.84817	-11.4464	5.54136e-37
rs7564625	9.87046224004e-09	-0.0210799	0.999999753238505	-7.6072	7.9723781316e-06	-0.235429	0.99956228757911	-3.83927	-11.4465	5.54085e-37
rs7562863	9.92541957696e-09	0.0288319160383192	0.999999751864572	-7.60423	8.01682596e-06	-0.199122	0.999559848306544	-3.84438	-11.4486	5.52902e-37
rs13001084	1.0014205041e-08	0.0416956960558004	0.999999749644937	-7.59932	8.1048965481e-06	0.123356200231128	0.999555015075898	-3.85113	-11.4505	5.51884e-37
rs4665911	9.97475595169e-09	-0.113977	0.999999750631163	-7.59567	8.0713378201e-06	-0.106036	0.999556856741665	-3.85519	-11.4509	5.51659e-37
rs35447809	1.0013404489e-08	0.068829084513376	0.999999749664951	-7.59786	8.1043841124e-06	0.106798111577128	0.99955504319775	-3.85307	-11.4509	5.51621e-37
rs7589610	1.0014205041e-08	0.0401885661180562	0.999999749644937	-7.59939	8.1052951204e-06	0.118617271635206	0.999554993202733	-3.85168	-11.4511	5.51547e-37
rs66661970	9.88600672656e-09	0.0808217772789263	0.999999752849893	-7.60337	8.0090132004e-06	0.181478576123137	0.999560277065665	-3.84822	-11.4516	5.51256e-37
rs13025436	1.0014805476e-08	0.0415439574714711	0.999999749629926	-7.5993	8.1057506436e-06	0.112111441276264	0.999554968204173	-3.8524	-11.4517	5.51196e-37
rs7589183	1.0015405929e-08	0.0409950338239556	0.999999749614915	-7.59929	8.1060353521e-06	0.107985992813766	0.999554952579717	-3.85284	-11.4521	5.5096e-37
rs7603056	1.0015005625e-08	0.038316362727954	0.999999749624922	-7.59942	8.1059214681e-06	0.108323235303415	0.999554958829532	-3.85281	-11.4522	5.50906e-37
rs34180820	1.0026417424e-08	0.0891932648903448	0.999999749339627	-7.59561	8.1142371025e-06	0.0273336960909937	0.999554502477841	-3.85779	-11.4534	5.50265e-37
rs4665908	9.89899633969e-09	0.106006711982769	0.999999752525153	-7.60036	8.0204505616e-06	0.146460501970311	0.999559649390912	-3.85325	-11.4536	5.50145e-37
rs7590170	9.91277105641e-09	0.110204704764526	0.999999752180785	-7.59921	8.0307058225e-06	0.130735218871853	0.999559086589704	-3.85479	-11.454	5.4993e-37
rs4665349	9.97459615441e-09	-0.114942	0.999999750635158	-7.59557	8.07071281e-06	-0.0690331	0.99955689104159	-3.85847	-11.454	5.49911e-37
rs2082611	9.90974457529e-09	0.0848122056059557	0.999999752256447	-7.60184	8.0291189449e-06	0.146648574060284	0.999559173676344	-3.85268	-11.4545	5.49644e-37
rs11890002	9.87447639616e-09	0.068768969431541	0.999999753138151	-7.60485	7.9993374561e-06	0.176714716562187	0.999560808064674	-3.84968	-11.4545	5.49637e-37
rs2082612	9.91026223009e-09	0.0831991465620897	0.999999752243506	-7.60195	8.0295723225e-06	0.146509978296543	0.999559148795323	-3.85267	-11.4546	5.49588e-37
rs11126733	9.87580800441e-09	0.0659670084959211	0.999999753104861	-7.60498	8.0005253904e-06	0.173816695657093	0.999560742871526	-3.85011	-11.4551	5.49332e-37
rs12471783	9.889506916e-09	0.0804810651006576	0.999999752762388	-7.60322	8.0096358169e-06	0.152794041263122	0.999560242896866	-3.85298	-11.4562	5.48724e-37
rs12987230	1.0025215876e-08	0.0155661866048779	0.999999749369666	-7.59952	8.1140661904e-06	0.0453684720486428	0.999554511857281	-3.85714	-11.4567	5.48467e-37
rs9646996	1.0028219881e-08	0.0175564454119691	0.999999749294566	-7.59934	8.1165161025e-06	0.036748626687025	0.999554377409224	-3.85734	-11.4567	5.48456e-37
rs4665353	1.00260169e-08	0.0173215819434735	0.99999974934964	-7.59945	8.1149207689e-06	0.0417257878237915	0.999554464959097	-3.85725	-11.4567	5.48447e-37
rs12995609	1.0024414884e-08	0.0164199676394798	0.999999749389691	-7.59955	8.1136674025e-06	0.0410823430286647	0.999554533742257	-3.85735	-11.4569	5.48338e-37
rs35455021	9.87411866596e-09	0.0666270834046167	0.999999753147094	-7.60502	7.9990546276e-06	0.158782431601055	0.99956082358614	-3.8527	-11.4577	5.47887e-37
rs11126734	9.87288653376e-09	0.0617241532008084	0.999999753177898	-7.60539	7.9978668025e-06	0.15981117731299	0.999560888773305	-3.85261	-11.458	5.4773e-37
rs4665350	9.87708007225e-09	0.0531203871870079	0.999999753073059	-7.60568	8.0017134129e-06	0.155752581547196	0.999560677673546	-3.85301	-11.4587	5.47357e-37
rs11891133	9.87296602384e-09	0.0532453795585471	0.99999975317591	-7.60588	7.9988849329e-06	0.149330499994696	0.999560832898888	-3.85417	-11.46	5.46614e-37
rs35605321	9.87781552384e-09	0.0498440443034918	0.999999753054673	-7.60581	8.0025054769e-06	0.138667383089361	0.999560634205542	-3.85548	-11.4613	5.45938e-37
rs4665348	9.88043952016e-09	0.0622802322727072	0.999999752989073	-7.60498	8.0047687329e-06	0.12874593092918	0.999560509999411	-3.85666	-11.4616	5.45744e-37
rs4665351	9.87602663524e-09	0.0529268994608476	0.999999753099395	-7.60574	8.0012608225e-06	0.132975447651707	0.999560702511441	-3.85633	-11.4621	5.45511e-37
rs4665352	9.88117509681e-09	0.0785987700708522	0.999999752970684	-7.60379	8.0044858084e-06	0.113131181032228	0.999560525526136	-3.85857	-11.4624	5.45352e-37

## Sheet: Table S2
Table S2. The locus gene PREX1 of rs112852122 was shown to be in the 1 MB range between RA and HGSR by colocalization
snp	V.df1	z.df1	r.df1	lABF.df1	V.df2	z.df2	r.df2	lABF.df2	internal.sum.lABF	SNP.PP.H4
rs112852122	5.8985351161e-06	-5.26609	0.999494662424408	10.0637028006838	3.1700378116e-06	-8.24675	0.999622789194019	30.0502233794539	40.1139261801377	0.843572
rs13037063	4.1752792225e-06	-6.04179	0.999642243882338	14.2772788947645	2.2336199209e-06	-7.57556	0.999734186305256	24.5705612581946	38.847840152959	0.0827676
rs13037942	4.1741758864e-06	-6.04416	0.99964233838717	14.291433276579	2.2329623761e-06	-7.57045	0.999734264536098	24.5317414618806	38.8231747384596	0.0807511
rs71351952	4.1308530025e-06	-6.04049	0.999646049167095	14.2641441752617	2.2092363225e-06	-7.54916	0.999737087331637	24.3656029988066	38.6297471740683	0.0665493
rs35334143	4.13105625e-06	-6.00172	0.999646031758062	14.0308068194295	2.2094741449e-06	-7.57318	0.999737059036755	24.5471869905702	38.5779938099997	0.0631928
rs13040292	4.1200474441e-06	-6.06792	0.999646974711093	14.4288320254267	2.2005348964e-06	-7.3462	0.999738122583516	22.8524438563234	37.2813	0.0172787
rs755588	4.1202910225e-06	-6.04434	0.999646953847504	14.2861074684027	2.2007129104e-06	-7.35521	0.999738101404285	22.9186618924116	37.2047693608142	0.016006
rs35971376	4.1248391409e-06	-6.01284	0.9996465642808	14.0968358076294	2.2048983121e-06	-7.35664	0.999737603446011	22.9301429642058	37.0269787718352	0.0133989
rs13044004	4.1194791225e-06	-6.0171	0.999647023390406	14.1217811871995	2.2002975556e-06	-7.34815	0.999738150821159	22.8666900850996	36.9884712722992	0.0128928
rs1556876	4.1163134769e-06	-5.99753	0.999647294542342	14.0038752721436	2.1987551524e-06	-7.35477	0.999738334328763	22.9150220613442	36.9188973334878	0.0120263
rs73611337	4.1168004201e-06	-6.0058	0.999647252833434	14.0535514978601	2.1990220681e-06	-7.34414	0.999738302572431	22.836984570176	36.8905360680361	0.01169
rs35989889	4.116841e-06	-5.98916	0.99964724935758	13.9538009482267	2.1991110436e-06	-7.35364	0.999738291986559	22.9067597818013	36.8605607300279	0.0113448
rs4599176	3.98241936e-06	-5.77756	0.999658763316787	12.6929410428406	2.1278932129e-06	-7.51962	0.99974676520904	24.1246105070378	36.8175515498784	0.0108672
rs73611338	4.1178555625e-06	-5.99177	0.999647162455682	13.9695709384745	2.1995262864e-06	-7.34492	0.999738242582995	22.8427985171061	36.8123694555806	0.010811
rs35843274	4.1164757881e-06	-6.03945	0.999647280639646	14.2561250380949	2.19869584e-06	-7.30409	0.999738341385464	22.5436277956602	36.7997528337551	0.0106755
rs13040426	4.1170033216e-06	-6.00737	0.999647235453995	14.0630446062738	2.1990220681e-06	-7.32978	0.999738302572431	22.7316266379963	36.7947	0.0106214
rs10485609	4.1162728996e-06	-6.03585	0.999647298017973	14.2343902992722	2.1985772176e-06	-7.30536	0.999738355498581	22.5529203895474	36.7873106888195	0.0105435
rs7274612	4.1165569449e-06	-6.00543	0.999647273688196	14.0513337211748	2.1988144656e-06	-7.32985	0.999738327271966	22.7321389486785	36.7834726698533	0.0105031
rs11908024	4.1165163664e-06	-6.00817	0.999647277163929	14.0677840956471	2.1988144656e-06	-7.3256	0.999738327271966	22.7010144753307	36.7687985709777	0.0103501
rs2075677	4.1165163664e-06	-6.00931	0.999647277163929	14.0745932474154	2.1988441225e-06	-7.31989	0.999738323743533	22.6591886507322	36.7337818981476	0.00999393
rs8123784	4.1161511689e-06	-5.99902	0.999647308444764	14.0128401695304	2.1986068729e-06	-7.32669	0.999738351970337	22.7089344276789	36.7217745972093	0.00987465
rs7264419	4.1168815801e-06	-6.00342	0.999647245881709	14.0393017114499	2.1989627521e-06	-7.32158	0.99973830962956	22.6715895757905	36.7108912872403	0.00976776
rs13042443	4.1162323225e-06	-6.03987	0.999647301493587	14.2586621216759	2.1986068729e-06	-7.29156	0.999738351970337	22.4521813704398	36.7108434921158	0.0097673
rs35640549	4.1170844836e-06	-6.01239	0.9996472285021	14.0931954461218	2.1990813849e-06	-7.30648	0.999738295515207	22.5612001365474	36.6543955826692	0.00923123
rs35393280	4.1169221604e-06	-6.02232	0.999647242405822	14.1528844812809	2.1991703616e-06	-7.29433	0.999738284929192	22.4725373082173	36.6254217894982	0.0089676
rs67777906	4.1219556676e-06	-5.98495	0.999646811263163	13.9292202004861	2.2035027364e-06	-7.31787	0.99973776948461	22.6454825234214	36.5747027239076	0.00852411
rs11906713	4.1209406001e-06	-5.98903	0.999646898208256	13.9535576290554	2.2029683776e-06	-7.31418	0.999737833059955	22.6183446687002	36.5719022977556	0.00850028
rs8118101	4.1097831076e-06	-5.97836	0.999647853898622	13.8883981548507	2.1951978244e-06	-7.32266	0.999738757562539	22.6786422255341	36.5670403803847	0.00845905
rs34832487	4.1212654081e-06	-6.00008	0.999646870386989	14.0197786921414	2.2032355489e-06	-7.30356	0.999737801273245	22.5408306921574	36.5606093842988	0.00840482
rs13044144	3.96965776e-06	-5.75803	0.999659856432411	12.5787476098266	2.12080969e-06	-7.49955	0.999747607987095	23.9722913583659	36.5510389681925	0.00832477
rs8125219	4.1162728996e-06	-6.02181	0.999647298017973	14.1497314146757	2.1986661841e-06	-7.28208	0.999738344913779	22.3831878262205	36.5329192408962	0.00817529
rs36098998	4.1097831076e-06	-5.97254	0.999647853898622	13.8536292876148	2.1951681921e-06	-7.32257	0.999738761088049	22.6780091791202	36.5316384667351	0.00816482
rs7269912	4.11724681e-06	-6.01158	0.999647214598104	14.0883560195865	2.1991703616e-06	-7.28846	0.999738284929192	22.4297724653313	36.5181284849178	0.00805526
rs11906450	4.1245954281e-06	-6.0464	0.999646585155885	14.2990994342114	2.2049577081e-06	-7.25889	0.999737596379374	22.2160235108163	36.5151229450277	0.00803108
rs67623477	4.1205346081e-06	-6.00248	0.999646932983299	14.0341134923877	2.2027605889e-06	-7.29492	0.999737857781621	22.4776351900788	36.5117486824665	0.00800403
rs2273101	4.1307310564e-06	-6.04132	0.99964605961231	14.2691248706982	2.2084040449e-06	-7.25968	0.999737186351744	22.2225545134189	36.4916793841171	0.007845
rs2295026	4.1157048384e-06	-6.00255	0.999647346675013	14.0339575679503	2.1983696361e-06	-7.27927	0.999738380195621	22.3626413182537	36.396598886204	0.00713345
rs71351953	4.1201286361e-06	-5.97499	0.999646967756632	13.8694917789073	2.2024934464e-06	-7.29132	0.999737889564908	22.4513232845458	36.320815063453	0.00661283
rs17448715	4.1142442896e-06	-5.93539	0.999647471777719	13.6330052975145	2.1993186601e-06	-7.32254	0.99973826728536	22.678685426967	36.3116907244814	0.00655276
rs7271812	4.1097831076e-06	-5.95636	0.999647853898622	13.7571615354114	2.1952274569e-06	-7.30446	0.999738754037005	22.5455395900317	36.3027011254432	0.00649412
rs73611323	4.1213872144e-06	-5.973	0.999646859953732	13.8577222529204	2.2032652356e-06	-7.28378	0.99973779774127	22.3965435304935	36.2542657834139	0.00618707
rs6512562	4.1167598404e-06	-5.97275	0.99964725630927	13.8557235695124	2.1989627521e-06	-7.27087	0.99973830962956	22.3016817722002	36.1574053417127	0.0056159
rs79186842	6.1166193124e-06	-5.43838	0.99947598856936	11.0032570646195	3.2982918544e-06	-7.6267	0.999607533911058	25.1503219426952	36.1535790073147	0.00559445
rs35752040	4.1173279744e-06	-5.95854	0.999647207646003	13.7710426812535	2.1991703616e-06	-7.26446	0.999738284929192	22.2551391630896	36.0261818443431	0.00492527
rs7274221	4.1172062281e-06	-5.95587	0.999647218074128	13.7551174659574	2.1991110436e-06	-7.26651	0.999738291986559	22.2700419856948	36.0251594516522	0.00492023
rs1983528	4.1125000849e-06	-5.93941	0.999647621176896	13.656655726485	2.1964129209e-06	-7.26753	0.999738612996161	22.2768514003376	35.9335071268226	0.00448933
rs34481751	5.6707325689e-06	-4.89395	0.999514169176029	8.1547098032065	3.0463513444e-06	-7.96107	0.999637501623988	27.7166200150323	35.8713298182388	0.0042187
rs2227946	4.1127434401e-06	-5.91615	0.999647600332399	13.5188962683757	2.1967686225e-06	-7.2772	0.999738570676492	22.3472145687823	35.8661108371581	0.00419674
rs11906283	4.1168004201e-06	-5.9057	0.999647252833434	13.4575971472745	2.2005645649e-06	-7.24052	0.999738119053703	22.0818677170552	35.5394648643297	0.00302727
rs6095391	4.1172062281e-06	-5.91364	0.999647218074128	13.5045475108533	2.1999415684e-06	-7.22637	0.999738193174773	21.9794410319005	35.4839885427538	0.0028639
rs6019482	5.5476736225e-06	-4.7483	0.999524707040903	7.44201185346887	2.9790414801e-06	-7.9928	0.999645508273334	27.9587228161335	35.4007346696024	0.00263513
rs34417222	3.6059351449e-06	-4.88525	0.999691012690237	7.88802149640187	1.9203584929e-06	-7.93508	0.999771457707741	27.2836815026121	35.171702999014	0.00209572
rs6019480	5.55403489e-06	-4.72186	0.999524162303202	7.31744448906771	2.9824599204e-06	-7.94387	0.999645101639609	27.569476576499	34.8869210655667	0.00157636
rs6019483	5.5583720644e-06	-4.70708	0.99952379089605	7.24818684933917	2.9847745225e-06	-7.94629	0.999644826310936	27.5890607031209	34.8372	0.00149997
rs35322849	5.5895834929e-06	-4.69485	0.999521118162284	7.19349190627382	3.0035316249e-06	-7.92974	0.99964259510447	27.4608558045488	34.6543477108226	0.00124925
rs34929358	6.2630568121e-06	-5.54225	0.999463449984289	11.5848731962631	3.3757447824e-06	-7.32823	0.999598321434119	22.9307484870941	34.5156216833572	0.00108743
rs71351950	5.5294581904e-06	-4.75492	0.999526266895679	7.47184494377321	2.96976289e-06	-7.86845	0.999646611991121	26.9713416929476	34.4431866367208	0.00101145
rs35049207	5.49855601e-06	-4.72041	0.999528913174741	7.30567408293902	2.9528641921e-06	-7.8857	0.999648622151213	27.1043461432042	34.4100202261432	0.000978452
rs76643618	5.5138553856e-06	-4.6984	0.999527603025395	7.20343187995296	2.9609117329e-06	-7.89392	0.999647664866664	27.170522152707	34.3739540326599	0.000943792
rs13039705	5.5115544289e-06	-4.70002	0.999527800065695	7.2108325687621	2.9599482025e-06	-7.89218	0.999647779482049	27.1566517730143	34.3674843417764	0.000937706
rs6019484	5.5860849801e-06	-4.66073	0.999521417750337	7.03368503090471	2.999824e-06	-7.90012	0.999643036135374	27.2258348633955	34.2595198943003	0.00084174
rs34381905	5.4487230625e-06	-4.58991	0.999533180601698	6.69394062244098	2.9250234729e-06	-7.94237	0.999651933921207	27.548096558475	34.242037180916	0.000827152
rs10485608	5.5228760064e-06	-4.69941	0.999526830553621	7.20899491257714	2.9653184401e-06	-7.87516	0.999647140673427	27.0233905998377	34.2323855124148	0.000819207
rs11907942	5.5145598561e-06	-4.72795	0.999527542698731	7.34270903691317	2.9614279744e-06	-7.84988	0.999647603457904	26.8240670086249	34.1667760455381	0.000767185
rs35080190	5.49621136e-06	-4.73507	0.999529113957203	7.37472171011413	2.9514552804e-06	-7.83181	0.999648789746626	26.6808222082137	34.0555439183278	0.000686424
rs11908276	5.4955080625e-06	-4.72104	0.999529174183608	7.30835521756602	2.9508024841e-06	-7.83961	0.999648867399251	26.7417622424669	34.0501174600329	0.000682709
rs35661455	5.4960706969e-06	-4.71487	0.999529126002792	7.27930622180878	2.9514209209e-06	-7.84321	0.99964879383382	26.7701029496184	34.0494091714272	0.000682226
rs34696920	5.5059214609e-06	-4.65955	0.999528282440031	7.02102854115988	2.95702416e-06	-7.86747	0.999648127307517	26.9615251373068	33.9825536784666	0.000638107
rs13045854	5.6338345449e-06	-4.62502	0.999517328828636	6.8721381802678	3.0250601329e-06	-7.86301	0.999640034244324	26.9375962526781	33.8097344329459	0.000536832
rs13037473	5.6337870736e-06	-4.62263	0.999517332893713	6.86112551327871	3.0250253476e-06	-7.86438	0.999640038382096	26.9483	33.8094667468887	0.000536689
rs13041213	4.3042556089e-06	-6.04684	0.999631196699274	14.322778081248	2.2998632409e-06	-6.84563	0.999726305124509	19.3231489530293	33.6459270342772	0.00045572
rs11905956	5.5318099204e-06	-4.72474	0.999526065508074	7.32908552690655	2.9731415184e-06	-7.78209	0.999646210092251	26.2963361327074	33.6254216596139	0.00044647
rs13044684	5.5238630841e-06	-4.62181	0.999526746026289	6.84758217063579	2.9660072841e-06	-7.80776	0.999647058733073	26.4951851649294	33.3427673355652	0.000336541
rs7274851	4.2161640889e-06	-5.80033	0.999638741954385	12.8529017022655	2.25360144e-06	-6.81468	0.999731809026602	19.1018095723817	31.9547112746472	8.39871e-05
rs7262349	4.2093087556e-06	-5.79687	0.999639329135301	12.832000780739	2.2487701681e-06	-6.79319	0.99973238382068	18.954562844739	31.786563625478	7.09883e-05
rs17450430	4.2147268804e-06	-5.79752	0.999638865055768	12.8364414101361	2.2516803136e-06	-6.7902	0.999732037589953	18.9348872850414	31.7713286951776	6.9915e-05
rs13039749	4.2096370276e-06	-5.79503	0.999639301017753	12.8214109252351	2.2489801156e-06	-6.78701	0.999732358842445	18.9126228493733	31.7340337746084	6.73556e-05
rs79941596	4.2095549584e-06	-5.80596	0.999639308047243	12.8847512814512	2.2489201296e-06	-6.77709	0.999732365979203	18.8454047780787	31.7301560595299	6.70949e-05
rs1115535	3.8732601636e-06	-5.48911	0.999668113602701	11.0548115205522	2.0708073409e-06	-7.03988	0.999753557169354	20.6196653631599	31.6744768837121	6.34612e-05
rs35667796	4.2093908224e-06	-5.78219	0.999639322106017	12.7470584832767	2.2487701681e-06	-6.78405	0.99973238382068	18.8925597405224	31.6396182237991	6.12871e-05
rs17378391	4.21521961e-06	-5.78579	0.99963882285194	12.7685513407384	2.2518603844e-06	-6.78006	0.999732016166275	18.8661840886885	31.6347354294269	6.09886e-05
rs111316448	6.4549024225e-06	-5.35603	0.999447023844803	10.5855042285635	3.4837475904e-06	-7.06212	0.999585475548914	21.0322215485383	31.6177257771018	5.996e-05
rs45622034	4.2162462225e-06	-5.78883	0.999638734919387	12.786290683596	2.2524306561e-06	-6.76941	0.999731948318982	18.7941567906016	31.5804474741977	5.77659e-05
rs3795075	4.2119763361e-06	-5.75961	0.999639100648537	12.6170972924239	2.2499700001e-06	-6.78351	0.99973224107222	18.8891444267821	31.5062417192061	5.36345e-05
rs34841991	4.2050013721e-06	-5.73424	0.999639698076635	12.470574723519	2.2466112769e-06	-6.77424	0.999732640672072	18.8255475984302	31.2961223219491	4.34701e-05
rs34806496	4.2236415225e-06	-5.70061	0.999638101489403	12.2804995536448	2.2580471824e-06	-6.78787	0.999731280100962	18.9204942593245	31.2009938129694	3.95255e-05
rs8121567	4.2097601329e-06	-5.69172	0.999639290473391	12.228275830105	2.2489501225e-06	-6.79165	0.999732362410836	18.9441532875111	31.1724291176161	3.84124e-05
rs13036715	4.2098011684e-06	-5.68068	0.999639286958569	12.1655130685977	2.2490101089e-06	-6.77509	0.999732355274031	18.8318580291406	30.9973710977383	3.22437e-05
rs67493040	4.11765264e-06	-5.7979	0.999647179836917	12.8271197947134	2.1986365284e-06	-6.55337	0.99973834844207	17.3434358407427	30.1705556354561	1.41047e-05
rs8116693	4.1220368784e-06	-5.78994	0.999646804307094	12.7815400571013	2.2012173225e-06	-6.5493	0.999738041391816	17.3173897369493	30.0989297940506	1.31298e-05
rs35888516	4.11765264e-06	-5.79544	0.999647179836917	12.8128416963093	2.1987254961e-06	-6.54426	0.999738337857125	17.2838197166913	30.0966614130005	1.31e-05
rs8122757	4.1178149776e-06	-5.79724	0.999647165931963	12.8233353024311	2.1987551524e-06	-6.5406	0.999738334328763	17.259894767808	30.0832300702392	1.29252e-05
rs35649484	4.1174091396e-06	-5.77959	0.999647200693834	12.721140112319	2.1985179076e-06	-6.5513	0.999738362554997	17.3298556102336	30.0509957225526	1.25152e-05
rs6090919	3.6397389961e-06	-4.75313	0.999688116991058	7.25616075076632	1.9389448516e-06	-7.20882	0.999769246251469	21.7905010339079	29.0466617846742	4.58419e-06
rs11908637	4.2440944144e-06	-4.55252	0.999636349641055	6.39927534349013	2.2765679689e-06	-7.06249	0.999729076623746	20.8258036142383	27.2250789577284	7.41582e-07
rs13037557	3.5258699529e-06	-5.91512	0.999697871286658	13.4367134801451	1.8793942281e-06	-5.98769	0.999776331783605	13.7195586255715	27.1562721057167	6.92272e-07
rs34326966	3.4385397489e-06	-4.32195	0.999705352330558	5.27202857815357	1.8286341529e-06	-7.2134	0.999782371466226	21.7945238092563	27.0665523874099	6.32866e-07
rs11904898	4.25555641e-06	-4.52392	0.999635367891225	6.27087399893819	2.2835440996e-06	-7.05785	0.999728246653679	20.7945495667566	27.0654235656948	6.32152e-07
rs34651656	3.5254568644e-06	-5.91099	0.999697906673157	13.4122584623015	1.8791200561e-06	-5.97493	0.999776364405738	13.6431395295738	27.0553979918753	6.25846e-07
rs6512554	3.5259075076e-06	-5.90039	0.999697868069601	13.3497236662323	1.8793393921e-06	-5.96168	0.999776338308222	13.5641624750189	26.9138861412512	5.43263e-07
rs6095360	3.5259826176e-06	-5.89783	0.999697861635435	13.334602683113	1.8794490649e-06	-5.95146	0.999776325258893	13.5032960430718	26.8378987261849	5.03511e-07
rs7266065	3.5262455089e-06	-5.90927	0.999697839115317	13.4021707347608	1.8798603664e-06	-5.93763	0.999776276320523	13.4212502908733	26.8234210256341	4.96274e-07
rs1538482	3.6052515625e-06	-6.02396	0.999691071247318	14.0972607533298	1.9226872921e-06	-5.80994	0.999771180620246	12.682546872063	26.7798076253929	4.75095e-07
rs1078624	3.4363149129e-06	-4.30087	0.999705542920099	5.18082532124277	1.8269577225e-06	-7.17627	0.999782570937379	21.5269795537322	26.707804874975	4.42089e-07
rs752421	3.4354993201e-06	-4.29406	0.999705612787495	5.15144694524427	1.8265252201e-06	-7.169	0.999782622398969	21.4747475778657	26.6262	4.07443e-07
rs1885287	3.4354251801e-06	-4.2945	0.999705619138666	5.15334910622666	1.8264981904e-06	-7.1687	0.999782625615116	21.4726279085732	26.6259770147999	4.07355e-07
rs1885163	3.6018346225e-06	-5.99162	0.99969136394956	13.9025538385806	1.9208574025e-06	-5.81058	0.999771398345971	12.6858239315921	26.5883777701728	3.92323e-07
rs13038477	3.4379463889e-06	-4.2556	0.999705403160459	4.98745621277203	1.8277417636e-06	-7.18442	0.999782477647732	21.5857017228751	26.5731579356471	3.86397e-07
rs752420	3.4356476025e-06	-4.29906	0.999705600084948	5.17296918677419	1.8266333409e-06	-7.15778	0.999782609534142	21.3944603065052	26.5674294932794	3.8419e-07
rs747786	4.2682733604e-06	-4.54121	0.999634278653498	6.35070575885321	2.2882007824e-06	-6.97385	0.999727692635678	20.2063648231201	26.5570705819733	3.8023e-07
rs2426125	3.6022142025e-06	-5.99025	0.999691331433933	13.8944041256944	1.9211068816e-06	-5.80434	0.999771368662198	12.6496410449424	26.5440451706367	3.7531e-07
rs1569750	3.6059351449e-06	-6.03529	0.999691012690237	14.1656516071257	1.9233529225e-06	-5.7313	0.999771101421578	12.2290519152091	26.3947035223348	3.23245e-07
rs6095314	3.4293484225e-06	-4.34072	0.999706139701729	5.35197155204932	1.8232290729e-06	-7.1073	0.999783014593444	21.0335151496325	26.3854867016818	3.20279e-07
rs6012538	3.4310893824e-06	-4.30653	0.999705990563025	5.20444400362108	1.8249037921e-06	-7.12772	0.999782815325722	21.1793208023522	26.3837648059732	3.19728e-07
rs34000667	4.2707528964e-06	-4.49564	0.999634066275487	6.14518	2.2898650329e-06	-6.97554	0.999727494635496	20.2185398294568	26.3637246447618	3.13385e-07
rs34633219	4.2677362225e-06	-4.50217	0.999634324660618	6.17418357231439	2.2884125625e-06	-6.96691	0.999727667439648	20.1580967200682	26.3322802923826	3.03684e-07
rs11697531	4.2676535889e-06	-4.49737	0.99963433173838	6.1525960805072	2.2884428176e-06	-6.96931	0.99972766384012	20.1748208117435	26.3274168922507	3.02211e-07
rs13038731	4.2668272969e-06	-4.49971	0.999634402512234	6.16301383111292	2.2875352516e-06	-6.96369	0.999727771815619	20.1354418015489	26.2984556326619	2.93584e-07
rs11700187	4.2693064129e-06	-4.49504	0.999634190170144	6.14228402787514	2.2890177025e-06	-6.965	0.999727595444573	20.1449089879867	26.2871930158618	2.90296e-07
rs4810881	3.4515323089e-06	-4.28501	0.9997042393304	5.11495978777533	1.8356998144e-06	-7.12146	0.999781530754806	21.1376567333174	26.2526165210928	2.8043e-07
rs4809728	3.4333495849e-06	-4.28221	0.999705796943656	5.10033119437787	1.8253090816e-06	-7.11361	0.999782767102058	21.0789482815356	26.1792794759135	2.606e-07
rs6019436	4.2400163569e-06	-4.47031	0.999636698937785	6.02804589058333	2.2729482169e-06	-6.95986	0.999729507276457	20.1056705720281	26.1337164626115	2.48993e-07
rs4810882	3.4488946944e-06	-4.23774	0.999704465279924	4.91320046835127	1.83385764e-06	-7.12757	0.999781749946752	21.1806208376281	26.0938213059794	2.39255e-07
rs1885290	3.4353139716e-06	-4.28783	0.999705628665294	5.12469948335087	1.8275524969e-06	-7.09604	0.999782500167754	20.954793245635	26.0794927289859	2.35851e-07
rs6095320	3.4331642944e-06	-4.24783	0.999705812816492	4.9537302495813	1.82601169e-06	-7.10374	0.999782683501702	21.0089795865647	25.962709836146	2.09855e-07
rs720727	3.4329048961e-06	-4.22685	0.999705835037743	4.86481783878314	1.8259306129e-06	-7.08328	0.999782693148717	20.8638565207757	25.7286743595589	1.66065e-07
rs11905558	3.4496375824e-06	-4.29772	0.999704401640898	5.16921119837171	1.83548304e-06	-7.03828	0.9997815565478	20.5487813737821	25.7179925721538	1.64301e-07
rs3795082	3.5139377025e-06	-5.85671	0.999698893442891	13.0913520387498	1.8728469904e-06	-5.79837	0.999777110801948	12.6023600457603	25.6937120845102	1.6036e-07
rs7267607	3.4319044516e-06	-4.20141	0.99970592074043	4.75749667030446	1.82493081e-06	-7.09094	0.999782812110977	20.9178764777294	25.6753731480338	1.57446e-07
rs35567324	3.4496004361e-06	-4.29145	0.999704404823012	5.14228285956204	1.8354288484e-06	-7.03271	0.999781562995811	20.5095714946623	25.6518543542244	1.53786e-07
rs3817652	3.5125131889e-06	-5.86425	0.999699015471601	13.1353083911131	1.8721354276e-06	-5.7818	0.999777195466806	12.506291979754	25.6416003708671	1.52217e-07
rs6095319	3.4332013521e-06	-4.23641	0.999705809641959	4.90529919738721	1.8258495376e-06	-7.06297	0.999782702795518	20.7202429799337	25.6255421773209	1.49792e-07
rs6090932	3.5132254096e-06	-5.85021	0.999698954460335	13.0532035810928	1.8723543556e-06	-5.7922	0.999777169417792	12.5665075376807	25.6197111187735	1.48921e-07
rs34984028	3.51487504e-06	-5.86169	0.999698813147369	13.1206518850953	1.8734491876e-06	-5.77798	0.999777039149899	12.4845375815277	25.6051894666231	1.46774e-07
rs2426122	3.5127006084e-06	-5.83395	0.999698999416603	12.9581468984763	1.8721354276e-06	-5.8049	0.999777195466806	12.6400597524404	25.5982066509166	1.45753e-07
rs2426121	3.5127006084e-06	-5.83395	0.999698999416603	12.9581468984763	1.8721354276e-06	-5.80488	0.999777195466806	12.6399749206463	25.5981218191226	1.45741e-07
rs6095367	3.5165625625e-06	-5.87244	0.999698668588479	13.1839516247464	1.87443481e-06	-5.75891	0.99977692187627	12.3748132573926	25.558764882139	1.40116e-07
rs6019535	3.5150250256e-06	-5.86343	0.999698800299093	13.1308811294964	1.8735313129e-06	-5.76716	0.999777029378274	12.4221003871474	25.5529815166439	1.39308e-07
rs2426120	3.5127006084e-06	-5.82584	0.999698999416603	12.9108804708783	1.8721627929e-06	-5.80334	0.999777192210763	12.630999553399	25.5418800242774	1.3777e-07
rs6019618	3.5135628025e-06	-5.83921	0.999698925558105	12.9889550603715	1.8726827716e-06	-5.78968	0.999777130341419	12.5519769539859	25.5409320143573	1.3764e-07
rs6090939	3.5131129489e-06	-5.83937	0.999698964094103	12.9898282491092	1.8723817225e-06	-5.78932	0.999777166161559	12.549811192226	25.5396394413352	1.37462e-07
rs6019613	3.5131129489e-06	-5.83851	0.999698964094103	12.9848454065569	1.8723817225e-06	-5.78996	0.999777166161559	12.5535337379079	25.5383791444649	1.37289e-07
rs6012591	3.5135253136e-06	-5.8387	0.999698928769532	12.9860175187997	1.8726554025e-06	-5.78906	0.999777133597914	12.5484078924039	25.5344254112036	1.36747e-07
rs6012590	3.5135253136e-06	-5.8387	0.999698928769532	12.9860175187997	1.8726554025e-06	-5.78905	0.999777133597914	12.5483655980798	25.5343831168795	1.36741e-07
rs73611328	3.5135253136e-06	-5.83865	0.999698928769532	12.985706123434	1.8726554025e-06	-5.7891	0.999777133597914	12.5486616594694	25.5343677829033	1.36739e-07
rs7509369	3.5135253136e-06	-5.83854	0.999698928769532	12.9850833412383	1.8726554025e-06	-5.78901	0.999777133597914	12.5481118332566	25.5331951744949	1.36579e-07
rs2869694	3.5135253136e-06	-5.83854	0.999698928769532	12.9850833412383	1.8726554025e-06	-5.78899	0.999777133597914	12.5479849515657	25.5330682928041	1.36562e-07
rs11905116	3.51375025e-06	-5.83606	0.999698909500712	12.9706380251072	1.8727101409e-06	-5.79111	0.9997771270849	12.5602845819331	25.5309226070403	1.36269e-07
rs6090940	3.5130754624e-06	-5.83785	0.999698967305325	12.9809738768666	1.8723543556e-06	-5.78933	0.999777169417792	12.5498796277712	25.5308535046378	1.36259e-07
rs6095417	3.5130754624e-06	-5.8227	0.999698967305325	12.892659208432	1.8724090896e-06	-5.80062	0.999777162905301	12.6153278142256	25.5079870226576	1.33179e-07
rs6012592	3.5130754624e-06	-5.82222	0.999698967305325	12.8898642561426	1.8724090896e-06	-5.80086	0.999777162905301	12.6167264364446	25.5065906925871	1.32993e-07
rs66501340	3.5130754624e-06	-5.82222	0.999698967305325	12.8898642561426	1.8724090896e-06	-5.80086	0.999777162905301	12.6167264364446	25.5065906925871	1.32993e-07
rs6090941	3.5130754624e-06	-5.82222	0.999698967305325	12.8898642561426	1.8724090896e-06	-5.80078	0.999777162905301	12.616217839819	25.5060820959615	1.32926e-07
rs6019604	3.5136002916e-06	-5.82995	0.999698922346661	12.9349456553698	1.8726280336e-06	-5.78772	0.999777136854385	12.5406526926873	25.4755983480571	1.28935e-07
rs6019620	3.5131879225e-06	-5.82074	0.999698957671608	12.8812649483695	1.8724638244e-06	-5.79518	0.999777156392715	12.5838001804017	25.4650651287711	1.27584e-07
rs2295027	3.5129255184e-06	-5.84395	0.999698980150042	13.016572794479	1.87224489e-06	-5.76982	0.99977718244249	12.4371040619909	25.4537	1.26139e-07
rs6012557	3.3923009124e-06	-5.95992	0.999709313373921	13.6835286070897	1.80768025e-06	-5.6556	0.999784864685607	11.7673677542308	25.4508963613205	1.25789e-07
rs6019557	3.51300049e-06	-5.8457	0.999698973727718	13.0268183714025	1.8722996224e-06	-5.76702	0.999777175930189	12.4209954591155	25.447813830518	1.25402e-07
rs927160	3.5142751296e-06	-5.82917	0.999698864537735	12.9305348624526	1.8729838449e-06	-5.78196	0.999777094518402	12.5074360579896	25.4379709204422	1.24173e-07
rs6095407	3.5133378721e-06	-5.83086	0.999698944826412	12.9402202388975	1.87251856e-06	-5.77876	0.999777149880034	12.4888274062099	25.4290476451074	1.2307e-07
rs6019609	3.51375025e-06	-5.8287	0.999698909500712	12.9277131719018	1.8727101409e-06	-5.78055	0.9997771270849	12.4992042422274	25.4269174141292	1.22808e-07
rs707533	3.5133378721e-06	-5.82803	0.999698944826412	12.9237419459955	1.8724638244e-06	-5.78062	0.999777156392715	12.4995623775192	25.4233043235147	1.22365e-07
rs707534	3.5133378721e-06	-5.82803	0.999698944826412	12.9237419459955	1.8724638244e-06	-5.78062	0.999777156392715	12.4995623775192	25.4233043235147	1.22365e-07
rs6019603	3.5133378721e-06	-5.82798	0.999698944826412	12.9234311116355	1.8724638244e-06	-5.77973	0.999777156392715	12.4944101203005	25.4178412319361	1.21699e-07
rs13041022	3.5133378721e-06	-5.82675	0.999698944826412	12.9162827066975	1.8724911921e-06	-5.78044	0.999777153136386	12.498523046902	25.4148057535995	1.2133e-07
rs6019595	3.5133378721e-06	-5.82659	0.999698944826412	12.9153504170255	1.8724911921e-06	-5.77935	0.999777153136386	12.4922308865814	25.4075813036069	1.20456e-07
rs7262379	3.5133378721e-06	-5.82659	0.999698944826412	12.9153504170255	1.8724911921e-06	-5.77935	0.999777153136386	12.4922308865814	25.4075813036069	1.20456e-07
rs2075676	3.5093278224e-06	-5.79095	0.999699288341104	12.7078218213759	1.8705212289e-06	-5.81134	0.999777387531291	12.6770154011234	25.3848372224992	1.17748e-07
rs6019558	3.5132254096e-06	-5.83847	0.999698954460335	12.9846272101232	1.8724090896e-06	-5.76149	0.999777162905301	12.3891398716909	25.3737670818141	1.16451e-07
rs1983639	3.5129255184e-06	-5.84395	0.999698980150042	13.016572794479	1.87224489e-06	-5.75374	0.99977718244249	12.3444848568588	25.3610576513378	1.14981e-07
rs6095400	3.51337536e-06	-5.82181	0.99969894161507	12.887528648313	1.8724911921e-06	-5.77408	0.999777153136386	12.4618003331905	25.3493289815035	1.1364e-07
rs2869692	3.5139751936e-06	-5.8052	0.999698890231276	12.7910952036004	1.8728743609e-06	-5.79046	0.999777107545286	12.5565737070091	25.3476689106095	1.13452e-07
rs7270848	3.5139751936e-06	-5.83246	0.999698890231276	12.949667236675	1.8728196201e-06	-5.76189	0.999777114058586	12.3915880567454	25.3412552934205	1.12726e-07
rs1997854	3.5128880329e-06	-5.81448	0.999698983361178	12.8448110760866	1.8722175241e-06	-5.77926	0.999777185698605	12.4916006826816	25.3364117587682	1.12182e-07
rs6019547	3.5147625529e-06	-5.846	0.999698822783397	13.0287887771804	1.8734765625e-06	-5.74712	0.999777035892714	12.3067599875591	25.3355487647395	1.12085e-07
rs6019591	3.5136002916e-06	-5.81901	0.999698922346661	12.8712655349592	1.8726280336e-06	-5.77436	0.999777136854385	12.4634451366542	25.3347106716134	1.11991e-07
rs6019602	3.5135628025e-06	-5.8256	0.999698925558105	12.909634977844	1.8725732964e-06	-5.76754	0.999777143367257	12.4240735443847	25.3337085222288	1.11879e-07
rs6012586	3.5135253136e-06	-5.81859	0.999698928769532	12.8688231284994	1.8726006649e-06	-5.77413	0.999777140110833	12.4620783906771	25.3309015191766	1.11565e-07
rs13042947	3.5135253136e-06	-5.81859	0.999698928769532	12.8688231284994	1.8726006649e-06	-5.77361	0.999777140110833	12.4590833283798	25.3279064568793	1.11231e-07
rs6019601	3.5135253136e-06	-5.81859	0.999698928769532	12.8688231284994	1.8726006649e-06	-5.77359	0.999777140110833	12.4589567823781	25.3277799108775	1.11217e-07
rs6019594	3.5135253136e-06	-5.80995	0.999698928769532	12.8185879577224	1.8725459281e-06	-5.78117	0.999777146623657	12.502737389168	25.3213253468904	1.10502e-07
rs66970580	3.5135253136e-06	-5.82291	0.999698928769532	12.8939687157839	1.8726280336e-06	-5.76449	0.999777136854385	12.4064988395338	25.3004675553176	1.08221e-07
rs6095401	3.5135253136e-06	-5.81838	0.999698928769532	12.8675818548015	1.8726006649e-06	-5.76865	0.999777140110833	12.4304961488889	25.2980780036905	1.07963e-07
rs112601802	3.4461838321e-06	-4.22649	0.99970469750428	4.86523035208656	1.833316e-06	-7.02078	0.999781814394048	20.4252364597325	25.2904668118191	1.07144e-07
rs6095324	3.4445132836e-06	-4.2215	0.999704840610846	4.84390196093627	1.8318539716e-06	-7.02335	0.999781988354242	20.4428475207741	25.2867494817103	1.06746e-07
rs2426117	3.5091030276e-06	-5.79919	0.999699307597809	12.7555636344246	1.8703844644e-06	-5.78218	0.999777403804137	12.5080271609165	25.2635907953411	1.04303e-07
rs1569749	3.51300049e-06	-5.81177	0.999698973727718	12.8290933429769	1.8721627929e-06	-5.76217	0.999777192210763	12.3930259159354	25.2221192589123	1.00066e-07
rs6095323	3.4443276921e-06	-4.21045	0.999704856509436	4.79732203978843	1.8315832896e-06	-7.01828	0.999782020561485	20.4072067476785	25.204528787467	9.83208e-08
rs6512567	3.5087658489e-06	-5.77951	0.999699336481711	12.6415723878956	1.8701656516e-06	-5.78949	0.999777429839457	12.5502	25.1918090323056	9.70781e-08
rs6095325	3.4454041924e-06	-4.2169	0.999704764291656	4.82463992528069	1.8323412496e-06	-7.01104	0.999781930375215	20.3566633946071	25.1813033198878	9.60636e-08
rs67843835	3.4454041924e-06	-4.21507	0.999704764291656	4.81689700129185	1.8322058881e-06	-7.01115	0.999781946481273	20.3573547101923	25.1742517114842	9.53886e-08
rs8124687	3.4454041924e-06	-4.21507	0.999704764291656	4.81689700129185	1.8322058881e-06	-7.01115	0.999781946481273	20.3573547101923	25.1742517114842	9.53886e-08
rs2295033	3.5131504356e-06	-5.80247	0.999698960882864	12.7751210737262	1.8722722561e-06	-5.76084	0.999777179186351	12.3853911555893	25.1605122293155	9.40869e-08
rs6019608	3.5145750784e-06	-5.84199	0.9996988388431	13.0053659638275	1.8734765625e-06	-5.71944	0.999777035892714	12.1480856580849	25.1534516219124	9.3425e-08
rs6019619	3.5778100801e-06	-5.72495	0.999693421947062	12.3374825792921	1.9063877184e-06	-5.83341	0.999773119995502	12.8149065219594	25.1523891012515	9.33257e-08
rs1048590	3.5136002916e-06	-5.80359	0.999698922346661	12.7816951977317	1.8725459281e-06	-5.75279	0.999777146623657	12.3390879724265	25.1207831701582	9.04222e-08
rs6019573	3.51337536e-06	-5.83488	0.99969894161507	12.9636871335657	1.87279225e-06	-5.71655	0.9997771173152	12.1314031984496	25.0950903320153	8.81286e-08
rs34280360	3.4482633025e-06	-4.23588	0.999704519367714	4.90524120398466	1.8342639225e-06	-6.98683	0.999781701605038	20.1877281376003	25.0929693415849	8.79419e-08
rs6019600	3.5139751936e-06	-5.82179	0.999698890231276	12.8875153415361	1.8729564736e-06	-5.72945	0.999777097775159	12.2052259239785	25.0927412655146	8.79218e-08
rs6019621	3.5149875289e-06	-5.78266	0.999698803511188	12.6606548852877	1.8732575689e-06	-5.75595	0.999777061949526	12.3574952671393	25.018150152427	8.16023e-08
rs6019624	3.5108641129e-06	-5.75659	0.999699156737132	12.5097331049569	1.8711230521e-06	-5.73953	0.999777315923702	12.2625323371753	24.7722654421322	6.3814e-08
rs2075675	3.5109765376e-06	-5.75581	0.999699147106443	12.5052261779318	1.8712051264e-06	-5.73688	0.999777306158139	12.2473630064464	24.7525891843782	6.25706e-08
rs13037209	6.1950214404e-06	-4.50188	0.999469275415397	6.35746939265176	3.3449849449e-06	-6.67062	0.999601980078492	18.3252367660124	24.6827061586642	5.83473e-08
rs6012593	3.5540544484e-06	-5.71445	0.999695456917386	12.2741618375132	1.8937337769e-06	-5.75209	0.999774625607002	12.3406523766665	24.6148142141796	5.45175e-08
rs6095327	3.4786726144e-06	-4.04852	0.999701914379779	4.1337371080199	1.8502800625e-06	-7.02189	0.999779795920849	20.437584189252	24.5713212972719	5.21972e-08
rs13039736	3.4867345984e-06	-4.12205	0.999701223759028	4.43522069742601	1.85477161e-06	-6.96223	0.999779261494316	20.0217022019317	24.4569228993577	4.65548e-08
rs34116853	3.4989573025e-06	-4.12004	0.99970017671671	4.42865962495411	1.8612872041e-06	-6.9437	0.999778486237726	19.8946293793598	24.3232890043139	4.07313e-08
rs4428070	3.48232921e-06	-4.0406	0.99970160114153	4.10224060314997	1.8524298816e-06	-6.99049	0.99977954012467	20.2181577668595	24.3203983700095	4.06137e-08
rs67763459	3.4798663936e-06	-4.04531	0.999701812115972	4.12092656087635	1.8507969936e-06	-6.97824	0.999779734413801	20.1322317549715	24.2531583158479	3.79726e-08
rs6012544	3.4778147121e-06	-4.0806	0.999701987871066	4.26397855715691	1.8499536169e-06	-6.95217	0.999779834762983	19.9504216998417	24.2144002569986	3.6529e-08
rs6019463	3.4788591289e-06	-4.07095	0.999701898402214	4.22482219132755	1.85041609e-06	-6.94056	0.999779779735616	19.8699220242162	24.0947442155438	3.24095e-08
rs6012541	3.4785234064e-06	-4.0782	0.999701927161523	4.25427231705791	1.8502800625e-06	-6.93395	0.999779795920849	19.8240827254495	24.0783550425074	3.18826e-08
rs2208590	3.1929401344e-06	-4.10353	0.999726391946083	4.31527852859206	1.6975744681e-06	-6.92165	0.999797965927541	19.6962585385006	24.0115370670927	2.98219e-08
rs6012542	3.4833743044e-06	-4.06874	0.999701511614701	4.21645132882134	1.8527293225e-06	-6.92824	0.999779504495711	19.7851264500792	24.0015777789005	2.95264e-08
rs6095329	3.4785234064e-06	-4.07829	0.999701927161523	4.25466579346761	1.8503072676e-06	-6.92132	0.99977979268385	19.7366169790736	23.9912827725412	2.9224e-08
rs67021138	3.4784488036e-06	-4.0446	0.999701933552292	4.11787756439246	1.8502256529e-06	-6.9345	0.999779802394776	19.8278839831946	23.9457615475871	2.79235e-08
rs4810883	3.5306785801e-06	-4.06873	0.999697459364259	4.22312078181763	1.8786540096e-06	-6.88799	0.999776419857907	19.5140560538874	23.737176835705	2.26664e-08
rs1022688	3.4878177049e-06	-5.67465	0.999701130976006	12.0382431783615	1.85858689e-06	-5.61331	0.999778807533884	11.5428783641654	23.5811215425269	1.93914e-08
rs348276	3.66224769e-06	-5.85682	0.999686188864836	13.1124393215093	1.9536491529e-06	-5.23579	0.999767496700035	9.52025569409899	22.6326950156083	7.51125e-09
rs348267	3.6654251209e-06	-5.8278	0.999685916682257	12.9434	1.9554386569e-06	-5.2529	0.99976728378117	9.61043150836689	22.5538044376369	6.94145e-09
rs3092427	3.6656548681e-06	-5.82438	0.999685897001839	12.9234795674619	1.9554386569e-06	-5.24825	0.99976728378117	9.58603109133649	22.5095106587984	6.6407e-09
rs348263	3.6614057104e-06	-5.8241	0.999686260989853	12.9212782659352	1.9532298564e-06	-5.24669	0.999767546588808	9.57727186513909	22.4985501310743	6.56831e-09
rs2426139	3.6656548681e-06	-5.81028	0.999685897001839	12.8414679887467	1.9554386569e-06	-5.2251	0.99976728378117	9.46483866334976	22.3063066520965	5.41955e-09
rs13038866	4.4938912144e-06	-5.06566	0.999614954330284	8.89446173420512	2.4002375329e-06	-5.85862	0.999714363509078	13.0764009513424	21.9708626855475	3.87509e-09
rs13038876	4.4889744384e-06	-5.04923	0.999615375447541	8.81082648020116	2.39754256e-06	-5.85922	0.999714684128584	13.0793893501508	21.890215830352	3.57485e-09
rs238164	4.4621070169e-06	-4.99662	0.999617676623285	8.54368715041393	2.3818983556e-06	-5.88673	0.999716545315398	13.2376702573453	21.7813574077592	3.20613e-09
rs6063374	4.4628252516e-06	4.95507777367529	0.99961761510685	8.33716212103264	2.3830714384e-06	5.90180214028451	0.999716405753811	13.3267122518736	21.6638743729062	2.85075e-09
rs348258	3.6115961764e-06	-5.8346	0.999690527754846	12.9757189528961	1.9257667984e-06	-5.0746	0.999770814211611	8.68236510089473	21.6580840537908	2.83429e-09
rs6648	4.4626985001e-06	-4.98275	0.999617625963051	8.47457469410062	2.3823305104e-06	-5.87226	0.999716493901964	13.152707886946	21.6272825810466	2.74832e-09
rs11553387	4.4659946241e-06	-4.94901	0.999617343651808	8.30749281307269	2.3855111401e-06	-5.89936	0.999716115502777	13.3128107546193	21.620303567692	2.72921e-09
rs2063710	4.4626140001e-06	4.95311220408144	0.999617633200432	8.32740478860257	2.3828861956e-06	5.89575424640141	0.999716427792132	13.2910087107374	21.6184	2.72405e-09
rs35506374	4.4856274849e-06	-5.03732	0.999615662111175	8.75044699237024	2.3954991076e-06	-5.81591	0.999714927237176	12.8262132321842	21.5766602245545	2.61266e-09
rs237711	4.4786833641e-06	-5.02838	0.999616256869561	8.70465824721409	2.3909509129e-06	-5.82232	0.999715468334232	12.8625540786523	21.5672123258664	2.58809e-09
rs6012617	4.4649380416e-06	4.9447241888464	0.999617434147512	8.28616684939113	2.3840286409e-06	5.88552035906038	0.999716291875518	13.2309789264718	21.517145775863	2.4617e-09
rs67652499	4.4794029316e-06	-5.05226	0.999616195239148	8.82506410347026	2.3923118241e-06	-5.79041	0.999715306427064	12.6776212127891	21.5026853162593	2.42636e-09
rs238150	4.4615155729e-06	-4.96172	0.999617727280166	8.36995349312169	2.3815588329e-06	-5.86192	0.9997165857084	13.0918802417769	21.4618337348986	2.32924e-09
rs13038202	4.4641351225e-06	-4.96391	0.999617502917098	8.38110051106941	2.3845845241e-06	-5.85792	0.999716225742157	13.0690838684126	21.450184379482	2.30226e-09
rs9753608	4.4662904896e-06	-4.95495	0.999617318311096	8.33692963040588	2.3856038116e-06	-5.86419	0.999716104477662	13.1060057826856	21.4429354130915	2.28563e-09
rs73611371	4.4688691609e-06	-4.92509	0.999617097449412	8.18976424453699	2.3894667241e-06	-5.88529	0.999715644907756	13.2307800683173	21.4205443128543	2.23502e-09
rs2273145	4.4663750244e-06	-4.95297	0.999617311070738	8.32709968852222	2.3857273764e-06	-5.85685	0.999716089777177	13.0630753971089	21.3901750856312	2.16817e-09
rs238217	4.46265625e-06	-4.99318	0.99961762958175	8.52661341676536	2.3824231201e-06	-5.80785	0.999716482884194	12.7766805924315	21.3032940091968	1.98775e-09
rs67733885	4.4634590361e-06	-4.99354	0.999617560823538	8.52847747556015	2.3836580881e-06	-5.80186	0.999716335960147	12.7421566808211	21.2706341563813	1.92387e-09
rs237714	4.4719983841e-06	-4.96077	0.999616829433413	8.36641318755169	2.3874576196e-06	-5.8292	0.999715883930453	12.9018950629397	21.2683082504914	1.9194e-09
rs238198	4.4631632644e-06	-4.97671	0.99961758615623	8.44458875538168	2.38270096e-06	-5.8153	0.999716449829599	12.8199751290805	21.2645638844622	1.91223e-09
rs13038621	4.4649803025e-06	-4.95738	0.999617430527889	8.34882635389327	2.3835036996e-06	-5.83123	0.999716354327733	12.9129342383756	21.2617605922689	1.90688e-09
rs237741	4.4638393284e-06	-4.97383	0.999617528251704	8.43031345473335	2.3829479424e-06	-5.81547	0.99971642044612	12.8210236308917	21.251337085625	1.88711e-09
rs56335217	4.4639660961e-06	-5.01635	0.999617517394118	8.64267080683116	2.3841830464e-06	-5.77826	0.999716273505913	12.6056739102679	21.248344717099	1.88147e-09
rs238200	4.4607129616e-06	-4.99091	0.999617796023429	8.51504938234434	2.3812810596e-06	-5.79593	0.99971661875508	12.7072784585338	21.2223278408781	1.83315e-09
rs238174	4.4633322756e-06	-4.98817	0.999617571680509	8.5016604838869	2.3827627044e-06	-5.79693	0.999716442483872	12.713397472329	21.2150579562159	1.81987e-09
rs35772539	4.4643041521e-06	-4.99647	0.999617488439803	8.54322584045126	2.3842139281e-06	-5.78617	0.99971626983192	12.6513614779567	21.194587318408	1.78299e-09
rs68014903	4.4654451856e-06	-4.99948	0.999617390710908	8.55836766682115	2.3847389476e-06	-5.77964	0.999716207370412	12.6137202531463	21.1720879199675	1.74333e-09
rs34580798	4.46181129e-06	-5.0124	0.999617701952145	8.62263715368575	2.3827627044e-06	-5.76813	0.999716442483872	12.5468937903214	21.1695309440072	1.73887e-09
rs3021	4.4645577025e-06	-5.01077	0.999617466723349	8.61474291253077	2.3843065744e-06	-5.76575	0.9997162588098	12.5334965951168	21.1482395076475	1.70224e-09
rs237743	4.4630365081e-06	-4.96656	0.999617597012841	8.39411329321527	2.3825774736e-06	-5.80348	0.999716464520767	12.7513301617238	21.1454434549391	1.69749e-09
rs36016605	4.4642618944e-06	-4.99669	0.999617492059152	8.5442848330901	2.3841830464e-06	-5.7771	0.999716273505913	12.598940533022	21.1432253661121	1.69373e-09
rs1977128	4.4644309264e-06	-5.01363	0.999617477581653	8.62907574129904	2.3843065744e-06	-5.75781	0.9997162588098	12.4877622081516	21.1168379494506	1.64962e-09
rs8117111	4.4644309264e-06	-5.01358	0.999617477581653	8.62883854874346	2.3843065744e-06	-5.75782	0.9997162588098	12.4878367643133	21.1166753130567	1.64935e-09
rs11905214	4.4644309264e-06	-5.01325	0.999617477581653	8.62717826354842	2.3843065744e-06	-5.75767	0.9997162588098	12.4869793785796	21.114157642128	1.6452e-09
rs35759030	4.4637970729e-06	-5.00258	0.999617531870865	8.57368268564191	2.3839977604e-06	-5.7669	0.999716295549368	12.5400654075103	21.1137480931522	1.64453e-09
rs67214274	4.4643041521e-06	-4.99856	0.999617488439803	8.55362896415139	2.38424481e-06	-5.76825	0.999716266157904	12.5478787476351	21.1015077117865	1.62452e-09
rs67375757	4.4670936025e-06	-4.9863	0.999617249524937	8.49278529447003	2.3857273764e-06	-5.77588	0.999716089777177	12.5922376555296	21.0850229499997	1.59796e-09
rs34804433	4.4642196369e-06	-4.99946	0.999617495678485	8.55811316481858	2.3842139281e-06	-5.76445	0.99971626983192	12.5259859319406	21.0840990967591	1.59649e-09
rs8121511	4.4645577025e-06	-5.01077	0.999617466723349	8.61474291253077	2.3843683396e-06	-5.75458	0.999716251461602	12.4691968009977	21.0839397135285	1.59623e-09
rs6019671	3.6556292809e-06	5.61598769855176	0.99968675580625	11.7304554111115	1.9494302884e-06	5.19577860222601	0.999767998669566	9.31054234850113	21.0409977596127	1.52914e-09
rs17445665	3.8355655716e-06	-4.93064	0.999671342461646	8.14138535181962	2.0491349904e-06	-5.84149	0.999756135725466	12.8978677417792	21.0392530935988	1.52647e-09
rs8123912	4.46434641e-06	-4.98424	0.999617484820437	8.4822000923652	2.3841830464e-06	-5.76886	0.999716273505913	12.5513967227627	21.0335968151279	1.51786e-09
rs35387764	4.4654451856e-06	-4.99489	0.999617390710908	8.53543795883768	2.38486249e-06	-5.75711	0.999716192672589	12.4839	21.0193036829677	1.49632e-09
rs4809724	4.4840180025e-06	-3.09258	0.999615799961991	0.848025211337863	2.4016630729e-06	-6.94824	0.999714193913419	20.0520400121668	20.9000652235046	1.32813e-09
rs6019506	3.8320020025e-06	-4.91188	0.9996716477124	8.04863316451318	2.0472744889e-06	-5.82574	0.999756357086825	12.8055707993691	20.8542039638822	1.2686e-09
rs4810880	3.2956408521e-06	-3.70481	0.999717593845654	2.77479848706346	1.7539823844e-06	-6.68136	0.99979125403223	18.0784324353408	20.8532309224042	1.26736e-09
rs237700	4.4647267401e-06	-4.93566	0.99961745224537	8.24138119115042	2.3832258129e-06	-5.77683	0.999716387387889	12.5972112387541	20.8385924299045	1.24895e-09
rs6512577	4.4664172921e-06	-4.9537	0.999617307450534	8.33073695348709	2.3856038116e-06	-5.7422	0.999716104477662	12.398269660735	20.7290066142221	1.11931e-09
rs1567865	4.4730558016e-06	-4.93116	0.999616738866301	8.22009838204458	2.3915385316e-06	-5.75666	0.999715398425418	12.4826620351499	20.7027604171944	1.09032e-09
rs35269800	3.83493889e-06	-4.91301	0.999671396142374	8.05454527094769	2.0487628225e-06	-5.79276	0.999756180005773	12.6143747941421	20.6689200650897	1.05404e-09
rs2869689	3.8328242176e-06	-4.90565	0.999671577282494	8.01813125936938	2.0476179025e-06	-5.79375	0.999756316227672	12.6198739194883	20.6380051788577	1.02195e-09
rs71351949	4.8735419121e-06	-3.8593	0.99958243867517	3.55343285137376	2.6074498576e-06	-6.49508	0.999689712183798	17.0475006405389	20.6009334919126	9.84758e-10
rs13040284	4.8505217121e-06	-3.85558	0.999584410208521	3.53675219931335	2.5951599025e-06	-6.49642	0.999691174242842	17.053821541052	20.5905737403653	9.74609e-10
rs7270715	4.8834370225e-06	-3.83645	0.999581591224447	3.46657100140611	2.6125873225e-06	-6.49748	0.999689101013018	17.0640320505781	20.5306030519842	9.17879e-10
rs6019454	4.8473948224e-06	-3.75965	0.999584678007287	3.17132701923466	2.5931949156e-06	-6.5244	0.999691408005432	17.2355750602869	20.4069020795216	8.11078e-10
rs35868390	4.8506979049e-06	-3.82533	0.999584395118702	3.42064352910967	2.5949665921e-06	-6.48319	0.999691197239805	16.9679587316243	20.388602260734	7.9637e-10
rs17445251	4.8508741009e-06	-3.82558	0.999584380028609	3.42162859744445	2.59499881e-06	-6.48215	0.999691193407037	16.9612672207515	20.382895818196	7.91839e-10
rs11907029	4.848804e-06	-3.74772	0.999584557319922	3.12670306787871	2.59403236e-06	-6.52484	0.999691308379731	17.2385839989959	20.3652870668746	7.78018e-10
rs71351946	4.8465582201e-06	-3.75926	0.999584749657124	3.16978065617276	2.59274404e-06	-6.51602	0.999691461643387	17.1808946778279	20.3506753340006	7.66732e-10
rs2093349	4.8500371984e-06	-3.83287	0.999584451704114	3.4494328524318	2.5945799929e-06	-6.47119	0.999691243231163	16.8902119946661	20.3396448470979	7.58321e-10
rs13040589	4.8491563264e-06	-3.85081	0.999584527145345	3.51825625516715	2.5940967844e-06	-6.46018	0.99969130071555	16.818969328781	20.3372255839481	7.56489e-10
rs35902471	4.8473067556e-06	-3.75541	0.999584685549665	3.15539306916543	2.5931627089e-06	-6.51593	0.999691411836869	17.1803793604109	20.3357724295764	7.5539e-10
rs71351951	4.8500812441e-06	-3.82872	0.999584447931873	3.43354821781703	2.5946122084e-06	-6.47289	0.999691239398681	16.9012049889134	20.3347532067304	7.54621e-10
rs71351945	4.8476149929e-06	-3.75432	0.99958465915104	3.15131141230461	2.5933237444e-06	-6.51598	0.999691392679447	17.1807101440467	20.3320215563514	7.52562e-10
rs8116854	4.8493765369e-06	-3.84742	0.999584508285678	3.50522293663914	2.5941934225e-06	-6.46137	0.9996912892191	16.8266316366175	20.3318545732567	7.52437e-10
rs13043461	4.8555003904e-06	-3.73549	0.99958398381581	3.0816522628898	2.5981571344e-06	-6.52592	0.999690817680526	17.2464428245356	20.3280950874254	7.49613e-10
rs13038134	4.8506098081e-06	-3.84053	0.999584402663645	3.47887060093309	2.5950310281e-06	-6.46461	0.999691189574245	16.8477273224638	20.3265979233969	7.48492e-10
rs7267399	4.8633921961e-06	-3.82794	0.999583307932672	3.43193765640886	2.6016399616e-06	-6.46953	0.999690403350232	16.8808376677657	20.3127753241746	7.38217e-10
rs11908325	4.8502574289e-06	-3.82565	0.999584432842737	3.42181822440652	2.5946122084e-06	-6.47084	0.999691239398681	16.8879501938396	20.3097684182462	7.36e-10
rs13043085	4.8499931529e-06	-3.83957	0.999584455476338	3.47510833515288	2.59467664e-06	-6.46014	0.999691231733644	16.8188276911167	20.2939360262696	7.24439e-10
rs11908314	4.8503455225e-06	-3.819	0.999584425298067	3.39641782524485	2.5946444241e-06	-6.47229	0.999691235566174	16.8973357704557	20.2937535957006	7.24307e-10
rs6512547	4.8504336169e-06	-3.81306	0.999584417753328	3.37377892287214	2.5947410724e-06	-6.47291	0.999691224068513	16.9014	20.2751734576522	7.10974e-10
rs35163235	4.8468224025e-06	-3.77415	0.999584727031527	3.22584222428119	2.5923254049e-06	-6.49549	0.999691511445889	17.0473003558425	20.2731425801237	7.09531e-10
rs963880	4.8477470976e-06	-3.7986	0.999584647837087	3.31848289347918	2.5925508196e-06	-6.4808	0.999691484629656	16.9520547954836	20.2705376889628	7.07686e-10
rs13037086	4.8508300516e-06	-3.84373	0.999584383801158	3.4912004800446	2.59499881e-06	-6.45298	0.999691193407037	16.7726262920959	20.2638267721405	7.02952e-10
rs36034145	4.8484076481e-06	-3.75507	0.999584591265013	3.15421225595097	2.5940967844e-06	-6.50346	0.99969130071555	17.0993852154058	20.2535974713568	6.95798e-10
rs57438425	4.8492003681e-06	-3.7511	0.999584523373446	3.13942784081338	2.5945155625e-06	-6.50449	0.999691250896057	17.1061436167928	20.2455714576062	6.90236e-10
rs16994202	4.8458097424e-06	-3.84782	0.999584813759641	3.50640614440715	2.5906833936e-06	-6.44791	0.999691706786153	16.7391412687427	20.2455474131498	6.90219e-10
rs6019451	4.8492884521e-06	-3.75288	0.999584515829596	3.14608746749372	2.5945799929e-06	-6.50304	0.999691243231163	17.0967506323159	20.2428380998096	6.88352e-10
rs11907750	4.8644949136e-06	-3.7723	0.999583213491979	3.22068312017287	2.6033177104e-06	-6.49125	0.999690203759013	17.0218303167219	20.2425134368948	6.88129e-10
rs35269082	4.8499491076e-06	-3.75263	0.999584459248545	3.14523035822265	2.5949665921e-06	-6.50162	0.999691197239805	17.0876223203429	20.2328526785656	6.81513e-10
rs13044335	4.0530950329e-06	-2.64577	0.999652709520244	-0.483845	2.1707012889e-06	-7.04798	0.999741672052246	20.699952827884	20.2161075882948	6.70196e-10
rs17366753	4.8810948624e-06	-3.84057	0.99958179181483	3.4821249860299	2.6115852816e-06	-6.44483	0.999689220219247	16.723237365031	20.2053623510609	6.63033e-10
rs17366795	4.8809623041e-06	-3.83815	0.999581803167566	3.47282708979079	2.6114883201e-06	-6.44427	0.999689231754122	16.7196044854349	20.1924315752256	6.54515e-10
rs6019464	4.8467783716e-06	-3.81268	0.999584730802502	3.3719585958764	2.5911984784e-06	-6.45354	0.999691645509587	16.7755682419687	20.1475268378451	6.25774e-10
rs34112716	4.8455896129e-06	-3.84297	0.999584832612382	3.48772116161205	2.5905224401e-06	-6.41475	0.999691725933832	16.5258884981305	20.0136096597425	5.47341e-10
rs6019456	4.8313358809e-06	-3.70352	0.999586053358575	2.96030785566198	2.5815812929e-06	-6.48864	0.999692789610019	17.0007985903006	19.9611064459626	5.19345e-10
rs75616158	4.8604816225e-06	-3.7576	0.999583557204746	3.16495332141699	2.5998660081e-06	-6.41487	0.999690614386406	16.5284496693714	19.6934029907884	3.97369e-10
rs34078534	4.5117158464e-06	-4.91455	0.99961342767023	8.1426427619606	2.4101010025e-06	-5.58775	0.999713190059052	11.528643160184	19.6712859221446	3.88677e-10
rs381262	4.2955464049e-06	-4.61343	0.99963194265892	6.68432298968693	2.2904098281e-06	-5.79086	0.99972742981982	12.6586315784949	19.3429545681819	2.79896e-10
rs237706	4.2572894224e-06	-4.56526	0.999635219454359	6.45890792593561	2.2699640896e-06	-5.70882	0.999729862307277	12.1826345528437	18.6415424787793	1.38796e-10
rs6095395	3.5158875049e-06	-5.65574	0.999698726416193	11.935107765826	1.8745443396e-06	-4.65388	0.999776908843964	6.62294145110406	18.558	1.27678e-10
rs4809726	3.9822996249e-06	-2.06852	0.999658773572881	-1.85282	2.1337029184e-06	-6.99559	0.999746073987334	20.3237010614383	18.4708800670297	1.1702e-10
rs6095298	3.1525778025e-06	-3.83749	0.999729849723312	3.25289790037729	1.6756525809e-06	-6.19229	0.999800574405096	14.9083522232838	18.1612501236611	8.58595e-11
rs13044736	3.1481050041e-06	-3.8138	0.999730232902359	3.16158206663936	1.6732457316e-06	-6.17415	0.999800860796067	14.7955153179378	17.9570973845771	7.00045e-11
rs7264180	3.4337201809e-06	-5.50056	0.999705765196701	11.0580547168985	1.8293915025e-06	-4.70335	0.999782281352521	6.8421680037053	17.9002227206038	6.61341e-11
rs2295031	3.4337201809e-06	-5.49953	0.999705765196701	11.0524169169842	1.8293915025e-06	-4.70282	0.999782281352521	6.83969973120323	17.8921166481874	6.56002e-11
rs6012581	3.4351656964e-06	-5.48699	0.999705641367225	10.9837515079475	1.8301219524e-06	-4.71087	0.999782194439508	6.87778	17.8615318223215	6.36242e-11
rs6019580	3.43509156e-06	-5.46698	0.999705647718087	10.874167585167	1.8301219524e-06	-4.71653	0.999782194439508	6.90442978443087	17.7785973695979	5.85605e-11
rs6019582	3.4352027649e-06	-5.49403	0.999705638191768	11.0223897368653	1.8302031225e-06	-4.68232	0.999782184781437	6.74371797004712	17.7661077069124	5.78336e-11
rs6019544	3.4359812496e-06	-5.51348	0.999705571503217	11.1294975641457	1.8307172416e-06	-4.65919	0.999782123608683	6.63587	17.7653656155457	5.77907e-11
rs2295580	3.4352769025e-06	-5.46732	0.999705631840802	10.8760422146234	1.8301760656e-06	-4.71187	0.999782188000818	6.88248079273581	17.7585230073592	5.73966e-11
rs3818223	3.4351656964e-06	-5.46455	0.999705641367225	10.860884082972	1.8300948961e-06	-4.71508	0.999782197658818	6.89761646334412	17.7585005463161	5.73953e-11
rs2273531	3.4351286281e-06	-5.46495	0.999705644542665	10.8631031418432	1.8300948961e-06	-4.71023	0.999782197658818	6.87473417319874	17.7378373150419	5.62215e-11
rs2295579	3.4351286281e-06	-5.46501	0.999705644542665	10.8633979159147	1.8300948961e-06	-4.70949	0.999782197658818	6.87125339617606	17.7346513120907	5.60427e-11
rs3818224	3.4351286281e-06	-5.4649	0.999705644542665	10.8628083706819	1.8300948961e-06	-4.70959	0.999782197658818	6.87174067207193	17.7345490427539	5.60369e-11
rs730544	3.4344984976e-06	-5.47538	0.999705698522525	10.9200485757807	1.8297431824e-06	-4.69375	0.999782239507678	6.79718230885133	17.717230884632	5.50748e-11
rs2295578	3.4356105316e-06	-5.46883	0.999705603260611	10.8843715187757	1.8304737025e-06	-4.66026	0.999782152586321	6.64079243361765	17.5251639523933	4.54506e-11
rs6019581	3.4358700321e-06	-5.45293	0.999705581030615	10.7975758280655	1.8305819401e-06	-4.66083	0.999782139707608	6.64348599939257	17.4410618274581	4.17844e-11
rs34316626	4.1178149776e-06	-1.81761	0.999647165931963	-2.32349	2.2085823769e-06	-6.76953	0.999737165134718	18.7852461264831	16.4617538227229	1.5693e-11
rs6019567	3.75816996e-06	-5.3957	0.99967797211232	10.5316541634248	1.9990566544e-06	-4.47102	0.9997620940502	5.8208278944987	16.3524820579235	1.40686e-11
rs35770820	5.7060787876e-06	-2.26656	0.999511142426391	-1.24433	3.0620450169e-06	-6.45156	0.99963563484721	16.8450853608979	15.6007546857942	6.63406e-12
rs723291	5.8858156449e-06	-2.39371	0.999495751573747	-0.93274	3.1582265796e-06	-5.93802	0.999624194114171	13.6802202214489	12.7474805720414	3.82488e-13
rs6122735	3.2074302649e-06	-3.15455	0.999725150605323	0.874567184553795	1.7073864889e-06	-5.61629	0.999796798403088	11.5175060056203	12.3920731901741	2.68081e-13
rs6019512	3.2072153569e-06	-3.14028	0.999725169016043	0.829658853314419	1.70720356e-06	-5.60944	0.999796820169626	11.4790268423975	12.3086856957119	2.46633e-13
rs34822542	5.8285064929e-06	-2.39159	0.999500658900354	-0.942676	3.1269556224e-06	-5.78555	0.999627913745042	12.7818622753095	11.8391865924362	1.54224e-13
rs71351936	5.6649236121e-06	-2.28595	0.999514666607453	-1.20382	3.0349820944e-06	-5.74725	0.999638854011087	12.5463653930758	11.3425414189609	9.38557e-14
rs547482873	0.00083500193296	-0.0131541	0.933208225339802	-1.35301	1.8737229456e-06	-5.76046	0.999777006576982	12.383573916886	11.0305669835747	6.87024e-14
rs35776712	5.8571260225e-06	-2.22221	0.999498208232016	-1.3308	3.1396650481e-06	-5.65215	0.999626401975629	12.0212635825181	10.6904599985735	4.88951e-14
rs62210126	3.4448473609e-06	-2.26096	0.999704811992305	-1.50873	1.8380038329e-06	-5.4811	0.999781256610269	10.8041303011841	9.29539732583706	1.21171e-14
rs35214127	1.90528758016e-05	-3.43687	0.998369545044933	2.6869600161203	1.03132184164e-05	-4.32513	0.998773846304213	5.9899574549755	8.6769174710958	6.52822e-15
rs3859594	1.11414428944e-05	-3.03201	0.999045922104462	1.11478736496545	6.0261903289e-06	-4.64448	0.999283172013742	7.15751178033575	8.2722991453012	4.35584e-15
rs11908055	5.3859269776e-06	-3.51756	0.999538558174265	2.3431782743357	2.8683487044e-06	-4.44939	0.999658675689765	5.90380286372405	8.24698113805975	4.24694e-15
rs6019409	3.3937376841e-06	-2.1487	0.999709190292604	-1.76363	1.8119582881e-06	-5.31145	0.999784355658304	9.88176975233964	8.11813749341121	3.73353e-15
rs749339	3.4174698496e-06	-2.02245	0.999707157276597	-2.02339	1.82439049e-06	-5.34755	0.999782876401349	10.0774962442925	8.05410974863001	3.50198e-15
rs6125464	3.4171740736e-06	-1.9779	0.999707182614198	-2.11251	1.8239582916e-06	-5.34141	0.999782927826799	10.0446019119841	7.9320960505085	3.09973e-15
rs6125465	3.4131823504e-06	-1.99026	0.999707524564613	-2.08858	1.82196004e-06	-5.31812	0.999783165590329	9.9199519730725	7.83136922977841	2.80271e-15
rs6125462	3.4130345536e-06	-1.98672	0.99970753722561	-2.09563	1.8218790529e-06	-5.31663	0.999783175226645	9.91201147606589	7.81638019227049	2.76101e-15
rs6125463	3.4130715025e-06	-1.98634	0.999707534060386	-2.09639	1.8219060484e-06	-5.31618	0.999783172014564	9.90960427133274	7.81321530826309	2.75229e-15
rs6125457	3.4120000656e-06	-2.00105	0.999707625844921	-2.06722	1.8212582116e-06	-5.31068	0.999783249097957	9.88020357844078	7.81298117777761	2.75164e-15
rs13045689	3.4135518564e-06	-1.991	0.999707492910923	-2.08704	1.8221220196e-06	-5.31278	0.999783146317056	9.89161450161032	7.80457326850462	2.72861e-15
rs1555139	3.4126281289e-06	-1.98213	0.999707572041939	-2.10481	1.8215551225e-06	-5.31368	0.999783213769769	9.89624470636252	7.79143500454174	2.69299e-15
rs4809727	3.4141800625e-06	-1.98334	0.999707439095722	-2.10218	1.8224190009e-06	-5.29726	0.999783110980497	9.80936814456765	7.70718570264676	2.4754e-15
rs35681651	2.22791552064e-05	-2.99609	0.998093981551966	1.34836333467556	1.20362506489e-05	-4.24344	0.998569285556936	5.71572726060614	7.0640905952817	1.30123e-15
rs6019546	3.396649e-06	3.47365708084645	0.999708940894277	1.96039865587419	1.8088905025e-06	4.3153797538942	0.999784720682264	5.08745957998112	7.04785823585531	1.28028e-15
rs6012568	3.3974599684e-06	3.46800707457601	0.999708871422565	1.94091305155616	1.8092133049e-06	4.30736690283777	0.99978468227324	5.05300946792557	6.99392251948173	1.21305e-15
rs2295023	3.3953221696e-06	3.48942278470021	0.999709054557393	2.01507700354507	1.8081643024e-06	4.27408007853169	0.999784807090047	4.90992687431038	6.92500387785546	1.13227e-15
rs1883881	3.3973125124e-06	3.46247789147018	0.999708884054402	1.92174	1.8092133049e-06	4.29168742147249	0.99978468227324	4.98560962741292	6.90734667743492	1.11245e-15
rs6066916	3.3839809936e-06	3.58025288655983	0.999710026101915	2.33438706977412	1.8025479081e-06	4.17498268272518	0.999785475363918	4.48982758046424	6.82421465023836	1.02371e-15
rs6019525	3.0815695936e-06	-3.503	0.999735932942479	2.01421796643252	1.6400131969e-06	-4.25281	0.999804815151763	4.77062944400381	6.78484741043633	9.84191e-16
rs6012562	3.0816398116e-06	-3.49901	0.999735926926919	2.00027243290244	1.6400644225e-06	-4.24346	0.99980480905638	4.73096262481555	6.73123505771799	9.32816e-16
rs8119308	3.0816398116e-06	-3.49944	0.999735926926919	2.00176704045927	1.6400644225e-06	-4.2425	0.99980480905638	4.72688824908298	6.72865528954225	9.30413e-16
rs6019562	3.9165201604e-06	3.99678628816283	0.999664408045715	3.98466261434884	2.0845006884e-06	3.71200598429124	0.999751927954457	2.73688944890126	6.7215520632501	9.23827e-16
rs4809737	3.8950574881e-06	4.19587148293212	0.999666246487986	4.79717691632286	2.0733984049e-06	3.48366934503761	0.999753248887859	1.91291358668692	6.71009050300977	9.13299e-16
rs4810908	3.3814796544e-06	3.54454341773253	0.999710240379983	2.2068443432701	1.8012592521e-06	4.16656607878639	0.999785628696429	4.45437518077718	6.66121952404728	8.69738e-16
rs1977121	3.0816047025e-06	-3.48585	0.999735929934707	1.95433185482745	1.6400644225e-06	-4.2366	0.99980480905638	4.70186599970819	6.65619785453564	8.65382e-16
rs6019521	3.0817100304e-06	-3.47443	0.999735920911292	1.91460231273147	1.6401156489e-06	-4.24397	0.999804802960901	4.7331486473739	6.64775096010536	8.58103e-16
rs6019520	3.0816398116e-06	-3.48579	0.999735926926919	1.95412936863803	1.6400644225e-06	-4.2338	0.99980480905638	4.69002899534159	6.64415836397961	8.55025e-16
rs1977122	3.0816047025e-06	-3.48238	0.999735929934707	1.94224795855862	1.6400388096e-06	-4.23623	0.999804812104083	4.70031156713835	6.64255952569697	8.53659e-16
rs6019518	3.0817100304e-06	-3.49784	0.999735920911292	1.99619954248855	1.6401156489e-06	-4.21192	0.999804802960901	4.59765445277617	6.59385399526471	8.13078e-16
rs6012558	3.1803015556e-06	-3.17415	0.999727474670596	0.93233632426579	1.6940063716e-06	-4.44822	0.999798390493146	5.63672567564558	6.56906199991137	7.93168e-16
rs6012576	3.3829141329e-06	3.55002800023923	0.999710117494887	2.22651	1.8022257009e-06	4.1356007955485	0.999785513702182	4.32613041906087	6.55263573342087	7.80245e-16
rs6019565	3.8963601664e-06	4.05812798897625	0.999666134903419	4.22906550049953	2.0737728036e-06	3.57337888699082	0.999753204342394	2.22946773315721	6.45853323365674	7.10171e-16
rs6012569	3.8973866724e-06	4.01253685074309	0.999666046975184	4.04528248239552	2.0745217024e-06	3.60930904243501	0.999753115239411	2.35865334095269	6.40393582334821	6.72437e-16
rs9973979	3.8973471889e-06	4.01420343739394	0.999666050357252	4.05196384134836	2.07446409e-06	3.60674859404291	0.999753122094057	2.34940361224358	6.40136745359194	6.70712e-16
rs11086274	3.8963996449e-06	4.04193664415658	0.999666131521778	4.1635169608257	2.0738304064e-06	3.57462779845564	0.999753197488889	2.23394408630592	6.39746104713162	6.68097e-16
rs2295025	3.8964786025e-06	4.03462600369817	0.999666124758444	4.13401446819284	2.0738592081e-06	3.57261698921595	0.9997531940621	2.22676690732042	6.36078137551326	6.44036e-16
rs6019559	3.8964391236e-06	4.03333434653536	0.999666128140119	4.12880065166868	2.0738592081e-06	3.5740196793256	0.9997531940621	2.23177792855141	6.36057858022009	6.43905e-16
rs6090930	3.8964391236e-06	4.03330395047469	0.999666128140119	4.12867809558683	2.0738592081e-06	3.57403356734649	0.9997531940621	2.23182755245731	6.36050564804414	6.43858e-16
rs3764683	3.89628121e-06	4.04464765185673	0.999666141666651	4.17445958714028	2.0737152016e-06	3.55924140996083	0.999753211195804	2.17904770688056	6.35350729402084	6.39368e-16
rs4810902	3.89628121e-06	4.04459699072901	0.999666141666651	4.17425475042159	2.0737440025e-06	3.5590847540016	0.99975320776911	2.17849720118515	6.35275195160673	6.38885e-16
rs6019541	3.8708595025e-06	4.15611070166967	0.9996683192389	4.62809467159205	2.0611770624e-06	3.40825253538393	0.999754702969294	1.65014760883011	6.27824228042216	5.93012e-16
rs2273102	4.1883669025e-06	3.88189880530649	0.999641122875334	3.56559993320716	2.2246020801e-06	3.68564743112685	0.999735259196377	2.6718207190636	6.23742065227076	5.69292e-16
rs4810910	3.8693250436e-06	4.09776010899515	0.999668450677862	4.38716834001511	2.0602009156e-06	3.46340239943149	0.999754819110313	1.83935045136512	6.22651879138023	5.63119e-16
rs6063345	3.8697971524e-06	4.0973678056914	0.999668410237876	4.38562202829785	2.0604018681e-06	3.45169672776419	0.999754795201173	1.79893604794839	6.18455807624624	5.39979e-16
rs6019543	3.8703479824e-06	4.12456539861334	0.999668363054779	4.49746409033199	2.06094736e-06	3.41363193089997	0.999754730299065	1.66843636390361	6.16590045423559	5.29998e-16
rs6066932	4.1877120321e-06	3.89049008253559	0.999641178967286	3.59889759422507	2.2243037881e-06	3.64954640239773	0.999735294685493	2.53938495584868	6.13828255007374	5.15561e-16
rs4810907	3.8724729796e-06	4.08172329332371	0.99966818103142	4.32200788590409	2.0624980996e-06	3.43499937332015	0.999754545793586	1.74196218315561	6.0639700690597	4.78637e-16
rs6122736	3.8699938729e-06	4.08839332462396	0.999668393387155	4.34892799645089	2.0608612249e-06	3.42535020932452	0.999754740547336	1.70847625208514	6.05740424853603	4.75505e-16
rs2426132	3.0990433681e-06	-3.37108	0.99973443597066	1.56376744435329	1.6492980625e-06	-4.14669	0.999803710337877	4.32788268421389	5.89165012856718	4.02874e-16
rs6090906	3.2159966224e-06	-2.37166	0.999724416743904	-1.28669	1.7123816164e-06	-4.74274	0.999796204037938	6.9952866135705	5.7085929566937	3.35481e-16
rs6066859	3.18479716e-06	2.41742127087303	0.999727089539914	-1.18202	1.6956206656e-06	4.68889	0.999798198409253	6.73649554957964	5.55447751499721	2.87565e-16
rs6019548	3.9145809609e-06	3.94211864363947	0.999664574152728	3.76748856745625	2.0856269889e-06	3.43752466814849	0.999751793949071	1.75619579612941	5.52368436358566	2.78845e-16
rs6019542	3.8883107344e-06	4.05574882852912	0.999666824400512	4.21838862033018	2.0722466209e-06	3.29187304189562	0.999753385925629	1.26303490654607	5.48142352687625	2.67307e-16
rs2426126	3.8855900161e-06	-4.03916	0.999667057451625	4.15093729606412	2.0707497801e-06	-3.30583	0.999753564017867	1.30869967522239	5.45963697128651	2.61546e-16
rs2426128	3.8855900161e-06	-4.03959	0.999667057451625	4.15263757089535	2.0707497801e-06	-3.30437	0.999753564017867	1.3038776123369	5.45651518323225	2.60731e-16
rs3092153	3.8859054129e-06	4.02977775748629	0.999667030435381	4.11312108802572	2.0709512464e-06	3.31324179336799	0.999753540047656	1.33327730341703	5.44639839144275	2.58106e-16
rs2426118	3.8859842641e-06	-4.04242	0.999667023681149	4.16415567613857	2.0709800281e-06	-3.29608	0.999753536623245	1.27659399459521	5.44074967073378	2.56652e-16
rs6019417	3.1355555625e-06	2.33420302131865	0.9997313079989	-1.38745	1.6695999369e-06	4.70938682640292	0.999801294609449	6.82511502421478	5.43766250605813	2.55861e-16
rs2426110	3.8850381025e-06	4.05221582405317	0.999667104727418	4.20365208965076	2.0705771025e-06	3.28118419681017	0.999753584562835	1.22751255277015	5.43116464242091	2.54204e-16
rs2426127	3.8854717456e-06	-4.03029	0.999667067582435	4.11511611680951	2.0706922201e-06	-3.30523	0.999753570866284	1.30670186538025	5.42181798218975	2.51839e-16
rs4810904	3.9135126276e-06	3.96404921496669	0.999664665663528	3.85401716782011	2.0849338449e-06	3.38066942303297	0.999751876418203	1.56225316980921	5.41627033762933	2.50446e-16
rs6066922	3.8874431556e-06	4.06316504874066	0.999666898715509	4.24837349213446	2.0719587249e-06	3.25988064720063	0.999753420179128	1.15818833709693	5.40656182923139	2.48026e-16
rs2426124	3.8853928996e-06	-4.03241	0.999667074336222	4.12365329686844	2.0706634404e-06	-3.29787	0.999753574290458	1.28241057051871	5.40606386738715	2.47903e-16
rs6012574	3.9128004864e-06	3.96845931408234	0.999664726663799	3.87141239437513	2.0845873161e-06	3.37214730470076	0.999751917647634	1.53340330280217	5.4048156971773	2.47594e-16
rs2295024	3.9135521929e-06	3.96072325820035	0.999664662274461	3.84084788844147	2.0849627236e-06	3.37707938002964	0.999751872982263	1.55013277942761	5.39098066786908	2.44192e-16
rs6066929	3.9139874244e-06	3.96606819721186	0.999664624993601	3.86208018379207	2.0851648801e-06	3.36958885326279	0.999751848930014	1.52491932833739	5.38699951212946	2.43221e-16
rs3764684	3.9133939329e-06	3.97201033246892	0.999664675830625	3.88558144623657	2.0848760881e-06	3.36230790007687	0.999751883290013	1.50034905470696	5.38593050094353	2.42962e-16
rs4810901	3.9135521929e-06	3.96091534522588	0.999664662274461	3.8416084553075	2.0849627236e-06	3.37419837389365	0.999751872982263	1.54040995620409	5.38201841151158	2.42013e-16
rs6125470	3.1511220196e-06	2.35805063262616	0.999729974438381	-1.32905	1.6773099121e-06	4.68411177428944	0.999800377199371	6.70872112025353	5.37967482243391	2.41446e-16
rs6019555	3.9135521929e-06	3.95802392999944	0.999664662274461	3.83016382361285	2.0849627236e-06	3.37318725154785	0.999751872982263	1.53699958642817	5.36716341004102	2.38444e-16
rs6063346	3.8862208225e-06	4.04080452481802	0.999667003418041	4.15764283673617	2.0710375921e-06	3.26730409767148	0.999753529774352	1.18218778436905	5.33983062110522	2.32015e-16
rs2426105	3.8853534769e-06	4.03686210447814	0.99966707771309	4.14161439800493	2.0705771025e-06	3.26743806247611	0.999753584562835	1.1825145230727	5.32412892107762	2.28401e-16
rs4810886	3.77252929e-06	4.10140040158575	0.999676742096121	4.38949374337147	2.00930625e-06	3.19509700176367	0.999760874546651	0.933840734755226	5.3233344781267	2.28219e-16
rs6019568	3.9130378596e-06	3.94763262458673	0.999664706330991	3.78903720093009	2.0847028225e-06	3.36770440142674	0.999751903904871	1.51846238183673	5.30749958276682	2.24634e-16
rs3795086	3.9136313241e-06	3.94806625924409	0.999664655496277	3.79082395559484	2.0849627236e-06	3.36640719143455	0.999751872982263	1.51415782776093	5.30498178335576	2.24069e-16
rs3092518	3.8853140544e-06	4.03939384715289	0.999667081089941	4.15182945128963	2.0706058816e-06	3.25626841607828	0.999753581138733	1.14609668324812	5.29792613453775	2.22494e-16
rs2426107	3.88720656e-06	-4.01948	0.999666918981799	4.07186325719775	2.0714981329e-06	-3.28062	0.999753474979783	1.22588832703199	5.29775158422974	2.22455e-16
rs6019418	3.1279105881e-06	2.26962721716169	0.999731962936388	-1.53728	1.6650031225e-06	4.71054365094742	0.999801841585272	6.82919036687536	5.29191121704498	2.21159e-16
rs3092801	3.8877191929e-06	4.02690023481917	0.999666875070726	4.10176529839731	2.0718147844e-06	3.26482235406911	0.999753437304986	1.17427130992043	5.27603660831775	2.17676e-16
rs6019574	3.88562944e-06	4.03198559253247	0.999667054074655	4.12198233982621	2.0707497801e-06	3.25855275501908	0.999753564017867	1.15357052674029	5.2755528665665	2.17571e-16
rs6066856	3.1382831104e-06	2.32711456828035	0.999731074332744	-1.40353	1.6710474361e-06	4.67544422870139	0.999801122371366	6.66630523043123	5.26277038576252	2.14808e-16
rs1473717	3.8855900161e-06	4.04260370639056	0.999667057451625	4.16483147743417	2.0707497801e-06	3.2397551094155	0.999753564017867	1.09250913404451	5.25734061147868	2.13644e-16
rs1473718	3.8855505924e-06	4.04225895149099	0.999667060828579	4.16343324961995	2.070721e-06	3.2368658790827	0.999753567442088	1.08314828525209	5.24658153487204	2.11358e-16
rs1998288	3.1313072025e-06	2.2642931818824	0.999731671951645	-1.54883	1.6668359236e-06	4.70229114061314	0.999801623499848	6.79090587191918	5.24207968406986	2.10409e-16
rs6066949	3.8890995264e-06	4.01577522210052	0.999666756834238	4.0572192490091	2.0732544144e-06	3.26576520265578	0.99975326601966	1.17769554086057	5.23491478986967	2.08907e-16
rs6019590	3.8855111689e-06	4.03829197887549	0.999667064205515	4.14740587983493	2.070721e-06	3.23658790826963	0.999753567442088	1.08224879136501	5.22965467119994	2.07811e-16
rs6066928	3.9137500224e-06	3.92865663795544	0.999664645328872	3.71442256676693	2.0850204816e-06	3.36515554447492	0.99975186611031	1.50995991159539	5.22438247836233	2.06718e-16
rs3092552	3.8883501721e-06	4.02805937450872	0.999666821022361	4.10651283313649	2.0721314601e-06	3.2469346782541	0.999753399627314	1.11612177178521	5.2226346049217	2.06357e-16
rs6012580	3.8855900161e-06	4.03829666343681	0.999667057451625	4.14743487893218	2.0707497801e-06	3.23405674734713	0.999753564017867	1.07406861761031	5.22150349654248	2.06124e-16
rs6066946	3.8855111689e-06	4.03827168635886	0.999667064205515	4.14732396021675	2.0706922201e-06	3.23248250509038	0.999753570866284	1.06896606294758	5.21629002316433	2.05052e-16
rs3764681	3.888784e-06	4.03471095334686	0.999666783861569	4.13337443659576	2.0731392256e-06	3.23571369041005	0.999753279724673	1.08000230604875	5.21337674264451	2.04455e-16
rs6019583	3.8854717456e-06	4.02593396781591	0.999667067582435	4.09759	2.0706922201e-06	3.24601282844217	0.999753570866284	1.11278333078256	5.21037185963657	2.03842e-16
rs6125522	3.88562944e-06	4.03552150974026	0.999667054074655	4.13624060960574	2.0707497801e-06	3.23161062119096	0.999753564017867	1.06616264737244	5.20240325697819	2.02224e-16
rs4810905	3.9101898564e-06	4.01388172467154	0.999664950284035	4.05230839990167	2.0833746921e-06	3.25564816161952	0.999752061923686	1.14714273029702	5.19945113019869	2.01628e-16
rs2295030	3.9141061281e-06	3.92924115830389	0.999664614825734	3.71676358857331	2.0853381649e-06	3.3487573317083	0.999751828312874	1.455	5.17176501920132	1.96122e-16
rs3764682	3.88838961e-06	4.0225214260358	0.999666817644193	4.08423345173095	2.0729664484e-06	3.23195210379363	0.99975330028148	1.06779941017212	5.15203286190307	1.9229e-16
rs6066855	3.21735969e-06	-2.15287	0.999724299972934	-1.78132	1.7134548201e-06	-4.72547	0.999796076338611	6.91386338577588	5.13254701678123	1.8858e-16
rs4810906	3.8883501721e-06	4.01674535597827	0.999666821022361	4.06101846105953	2.0729376529e-06	3.22581384526695	0.999753303707531	1.04797765525055	5.10899611631008	1.8419e-16
rs6095292	3.13785796e-06	-2.26853	0.999731110754924	-1.53818	1.6702719121e-06	-4.67062	0.999801214651042	6.64352556116142	5.10534999116059	1.8352e-16
rs2246266	3.88444681e-06	3.99755949058806	0.999667155376333	3.98366404542317	2.07014544e-06	3.24617041979427	0.999753635921511	1.11316309021614	5.09682713563931	1.81962e-16
rs6067012	3.7824026256e-06	4.11533596594064	0.999675896350706	4.44802695413193	2.01214225e-06	3.00548466690166	0.999760537118053	0.346831447519619	4.79485840165155	1.34536e-16
rs6095362	3.5929581601e-06	3.93429209025539	0.999692124326737	3.6940371178134	1.91130625e-06	3.25090054249548	0.999772534772135	1.08871861413213	4.78275573194553	1.32917e-16
rs6066912	3.6166910976e-06	3.92404930169948	0.999690091314009	3.65707901626744	1.9235470864e-06	3.17127159461252	0.999771078319388	0.836265325418729	4.49334434168617	9.95159e-17
rs2426102	3.1595418001e-06	-2.33823	0.999729253126928	-1.37424	1.6840512441e-06	-4.4618	0.999799575049543	5.69429075940291	4.32005095804754	8.3682e-17
rs45523437	0.00014803102224	3.39729427622711	0.987470497950025	3.50866427084914	8.024397241e-05	2.51106844238047	0.990538342012596	0.792648461664443	4.30131273251358	8.21285e-17
rs34031790	1.98333059716e-05	-2.8589	0.998302872867411	0.890311897460783	1.07600400625e-05	-3.66749	0.998720790977756	3.38589957379859	4.27621147125937	8.00927e-17
rs1555140	3.1266373329e-06	-2.02886	0.999732	-2.05481	1.6656741721e-06	-4.52328	0.999801761736915	5.96498114029766	3.91016871240551	5.55421e-17
rs11086264	3.1262836969e-06	-1.95172	0.999732102310678	-2.20835	1.6655709249e-06	-4.55086	0.999801774022324	6.09004731679803	3.88169572013926	5.3983e-17
rs6012529	3.1825489609e-06	2.77943014736795	0.99972728213922	-0.241974	1.6934077161e-06	4.09095449969646	0.999798461726831	4.11150226955729	3.86952845015145	5.33301e-17
rs1474741	3.1272031921e-06	-2.02198	0.999732023538355	-2.06865	1.6660871929e-06	-4.51185	0.999801712591475	5.9134782703752	3.84482722770756	5.20289e-17
rs2426098	3.1272031921e-06	-2.02511	0.999732023538355	-2.06231	1.6660871929e-06	-4.50691	0.999801712591475	5.89119379852499	3.82888041065541	5.12058e-17
rs6090902	3.1237734564e-06	-2.03813	0.999732317360776	-2.03641	1.6639452036e-06	-4.4998	0.999801967467329	5.85854848443011	3.82213476932864	5.08616e-17
rs6066842	3.1239148516e-06	-2.03606	0.999732305247571	-2.04061	1.6639968016e-06	-4.49878	0.999801961327668	5.85399565381307	3.81338555110813	5.04185e-17
rs2426090	3.12617761e-06	-2.00601	0.999732111399048	-2.10098	1.6654676809e-06	-4.512	0.999801786307352	5.91396718788475	3.81298945565949	5.03985e-17
rs1883744	3.1244451121e-06	-2.0263	0.999732259820614	-2.06036	1.6642290025e-06	-4.50152	0.999801933698018	5.86639440397944	3.80603449686886	5.00492e-17
rs6066846	3.1229251524e-06	-2.02187	0.999732390034256	-2.06956	1.6635324484e-06	-4.49973	0.999802016581191	5.85811	3.78855511399165	4.9182e-17
rs11696738	3.1241269504e-06	-2.03146	0.99973228707725	-2.04994	1.6641e-06	-4.49411	0.999801949048062	5.83301259447116	3.78307028975178	4.8913e-17
rs1883743	3.1241976516e-06	-2.0304	0.99973228102034	-2.05207	1.6641516004e-06	-4.49402	0.999801942908115	5.83261048054878	3.78054215689305	4.87895e-17
rs2426095	3.1262129721e-06	-2.02378	0.999732108369608	-2.06516	1.6654934916e-06	-4.49362	0.999801783236131	5.83124710465822	3.76608220825147	4.80891e-17
rs13043795	3.1233139441e-06	-2.01663	0.999732356726801	-2.08007	1.6637388196e-06	-4.49618	0.999801992025021	5.8422047115152	3.7621309601564	4.78994e-17
rs2426094	3.1261422481e-06	-2.01139	0.99973211442847	-2.09017	1.6654676809e-06	-4.49466	0.999801786307352	5.83592206836959	3.74575137785902	4.71213e-17
rs2426088	3.1258593601e-06	-2.02715	0.999732138663233	-2.0584	1.6652870116e-06	-4.48703	0.999801807805237	5.80157780281941	3.74317	4.69999e-17
rs3092318	3.1258947204e-06	-2.02643	0.999732135633947	-2.05987	1.6653128209e-06	-4.4813	0.999801804734182	5.77589470195422	3.7160290441181	4.57413e-17
rs2426100	3.1278398449e-06	-2.03047	0.999731968996893	-2.05135	1.6664486281e-06	-4.47896	0.99980166958422	5.76578383743873	3.71443349639676	4.56684e-17
rs2426093	3.1260361636e-06	-2.01149	0.999732123516634	-2.08998	1.66539025e-06	-4.48167	0.999801795520874	5.77756899167502	3.68758646814466	4.44586e-17
rs2179635	3.1249047076e-06	-2.00403	0.999732220447468	-2.10514	1.6644870225e-06	-4.46385	0.999801902996147	5.69764147963746	3.59250544897307	4.04262e-17
rs6095255	3.5642041681e-06	0.912093267157862	0.999694587464503	-3.63109	1.9082383321e-06	4.77708684730597	0.999772899803204	7.2126284755145	3.58153494107894	3.99851e-17
rs2426101	3.1292902404e-06	-2.13127	0.99973184474286	-1.84143	1.6672232641e-06	-4.40144	0.999801577410125	5.42184790283671	3.5804177496858	3.99405e-17
rs4810872	3.1245158169e-06	-2.00107	0.999732253763395	-2.11112	1.6642806049e-06	-4.4583	0.999801927557834	5.67281527058032	3.56169409902875	3.91996e-17
rs4809725	3.1246218756e-06	-1.97507	0.999732244677439	-2.16278	1.6643838121e-06	-4.4684	0.999801915277181	5.71792245217605	3.55514114852189	3.89436e-17
rs6063319	3.1257886401e-06	-1.99282	0.999732144721752	-2.12739	1.6651063521e-06	-4.44191	0.999801829301956	5.60011	3.47272156518471	3.58626e-17
rs2869671	3.1250461284e-06	-1.98712	0.999732208332073	-2.13886	1.6646676484e-06	-4.43379	0.999801881503423	5.56396132994412	3.42510383420904	3.41949e-17
rs2073071	3.12617761e-06	-1.98722	0.999732111399048	-2.13847	1.6653386304e-06	-4.42605	0.999801801663103	5.52990020841189	3.39143035387938	3.30626e-17
rs4810877	3.3815899881e-06	-2.39099	0.999710230928208	-1.21563	1.8006687721e-06	-4.20155	0.999785698955522	4.6005617613762	3.38492989619792	3.28484e-17
rs2092490	3.1252582656e-06	-1.95674	0.999732190158466	-2.19872	1.6647966729e-06	-4.43594	0.999801866150764	5.57354752711853	3.37483026662861	3.25183e-17
rs79705218	5.15750912964e-05	1.03655880739336	0.995598696988874	-2.17806	2.72096813641e-05	4.07935525057081	0.996771486574182	5.4258398157308	3.24777507565262	2.86384e-17
rs2145835	1.691347876e-05	2.4300953168312	0.998552359487105	-0.320503	8.9203171561e-06	3.72482581051264	0.99893927472189	3.50540404437836	3.18490110707133	2.68932e-17
rs6067015	3.2292449401e-06	3.34634754397583	0.999723281791149	1.50121615841985	1.7212915204e-06	3.43603561029894	0.999795143859259	1.65535976809731	3.15657592651717	2.61421e-17
rs2024595	3.17374225e-06	-2.44674	0.999728036595537	-1.11248	1.6895320324e-06	-4.09688	0.999798922892522	4.13462516848206	3.02214786434324	2.28539e-17
rs2024596	3.1735284736e-06	-2.44777	0.999728054909421	-1.10997	1.6894540441e-06	-4.09228	0.999798932172315	4.11574550795498	3.00577094609248	2.24826e-17
rs6063372	3.75816996e-06	3.95689157123698	0.99967797211232	3.80553825517496	2.0031023961e-06	2.53063286488473	0.999761612684866	-0.969519	2.83601935890819	1.89725e-17
rs537254	3.6911247129e-06	-3.90469	0.99968371522953	3.5914416971371	1.9683528804e-06	-2.59074	0.999765747222997	-0.824386	2.7670557103053	1.77082e-17
rs34500768	1.71508626496e-05	-2.81142	0.998532071402555	0.684286818990142	9.2566237009e-06	-3.30245	0.998899328136402	2.04116321333047	2.72545003232062	1.69866e-17
rs348292	3.6896263056e-06	-3.89287	0.99968384358433	3.54518525967708	1.9675953441e-06	-2.5661	0.999765837355935	-0.888091	2.65709403208727	1.58642e-17
rs112132641	1.70165325121e-05	2.45220127463268	0.998543551866345	-0.263611	8.9839871289e-06	3.55876730289958	0.998931711739528	2.9047986822844	2.64118790841594	1.56139e-17
rs348290	3.6891653184e-06	-3.88059	0.999683883072879	3.49739619551997	1.9671745536e-06	-2.5754	0.999765887422301	-0.864275	2.63312095593997	1.54884e-17
rs112752495	1.69716809089e-05	2.33417482468256	0.998547385146896	-0.546966	8.9552358009e-06	3.63555252578922	0.998935126926846	3.17913390771301	2.6321677708467	1.54737e-17
rs77107041	1.69749768049e-05	2.33362297242523	0.998547103459329	-0.548156	8.9569715524e-06	3.63560120555195	0.998934920747307	3.17940613574571	2.63125008481145	1.54595e-17
rs6019434	1.69022121129e-05	2.37727152214787	0.998553322414935	-0.447621	8.9070611809e-06	3.60804430937486	0.998940849335782	3.07695389003923	2.62933310766441	1.54299e-17
rs79640743	1.69650900769e-05	2.31500872812203	0.998547948440458	-0.591647	8.9477560384e-06	3.64676660158862	0.99893601540407	3.21951122448535	2.62786403833488	1.54072e-17
rs508890	3.690241e-06	-3.87431	0.999683790929099	3.47319314796198	1.96784784e-06	-2.57877	0.999765807313548	-0.855432	2.61776129367075	1.52524e-17
rs348293	3.68947264e-06	-3.88492	0.999683856747453	3.5142496656911	1.9673709169e-06	-2.56281	0.999765864058663	-0.896565	2.61768459187545	1.52512e-17
rs348286	3.6902794201e-06	-3.87708	0.999683787638001	3.48393071345506	1.96784784e-06	-2.56877	0.999765807313548	-0.881167	2.60276351496416	1.50253e-17
rs670016	3.6902025801e-06	-3.87651	0.999683794220179	3.48171633841068	1.96784784e-06	-2.56313	0.999765807313548	-0.895632	2.58608384687278	1.47768e-17
rs348291	3.68947264e-06	-3.87034	0.999683856747453	3.45774233002652	1.9675111824e-06	-2.56078	0.999765847369637	-0.90173	2.55601232697638	1.4339e-17
rs348284	3.6903178404e-06	-3.8673	0.999683784346887	3.44611574264399	1.9678758961e-06	-2.56211	0.999765803975386	-0.898229	2.54788666474894	1.4223e-17
rs348288	3.6902794201e-06	-3.86943	0.999683787638001	3.45434138719848	1.9678758961e-06	-2.55414	0.999765803975386	-0.91863	2.53571130838458	1.40509e-17
rs79393750	1.69566062656e-05	2.30239640199716	0.99854867352076	-0.620971	8.9475765625e-06	3.62677810279983	0.998936036722982	3.14688507129848	2.52591424151273	1.39139e-17
rs77303587	1.69589946969e-05	2.30276848958144	0.998548469390172	-0.620046	8.9488329316e-06	3.62615579014929	0.99893588748613	3.14469982263295	2.52465429109729	1.38964e-17
rs113548422	1.69218695044e-05	2.2489632002956	0.99855164235559	-0.743408	8.9312517904e-06	3.65886793462985	0.998937975852717	3.26275914643168	2.51935159547531	1.38229e-17
rs6019431	1.6908544e-05	2.35990029182879	0.998552781246579	-0.488521	8.9146433476e-06	3.58765331207674	0.998939948685857	3.00409	2.51556605319274	1.37706e-17
rs348295	3.6854016676e-06	-3.85681	0.999684205470469	3.40494878417457	1.9654077249e-06	-2.55879	0.999766097642624	-0.907356	2.49759288703725	1.35253e-17
rs348277	3.6919701025e-06	-3.84157	0.999683642812777	3.34718700478009	1.9687457344e-06	-2.57667	0.999765700480576	-0.860614	2.48657335503137	1.33771e-17
rs348274	3.6919701025e-06	-3.84442	0.999683642812777	3.35812381753697	1.9687176721e-06	-2.56731	0.999765703819475	-0.884691	2.47343279339463	1.32025e-17
rs8116199	3.6911631376e-06	3.85270450334159	0.999683711938039	3.3898900251118	1.9684370601e-06	2.55260475691549	0.999765737207156	-0.922401	2.46749	1.31242e-17
rs348294	3.6856704361e-06	-3.85558	0.999684182447519	3.40022614981234	1.9657161616e-06	-2.54816	0.999766060944288	-0.934429	2.46579730260228	1.31021e-17
rs348273	3.69216225e-06	-3.84585	0.999683626353269	3.36366658878486	1.9688299225e-06	-2.56097	0.999765690463737	-0.900928	2.46273891078292	1.30621e-17
rs348264	3.6918548164e-06	-3.8441	0.999683652688276	3.3568988824362	1.9686615481e-06	-2.56227	0.999765710497202	-0.897642	2.45925718394465	1.30167e-17
rs6019670	3.6849793369e-06	3.84967936529435	0.999684241647696	3.3774091610611	1.9651834225e-06	2.55291222313372	0.999766124330517	-0.922442	2.4549669891086	1.29609e-17
rs348275	3.6919316736e-06	-3.84054	0.999683646104627	3.34320180937139	1.9687176721e-06	-2.56449	0.999765703819475	-0.891931	2.45127073742892	1.29131e-17
rs75200484	2.71346186281e-05	-1.76407	0.997679552550938	-1.48063	1.49067804649e-05	-3.76694	0.998228678342059	3.91434457142389	2.43371146349023	1.26883e-17
rs2145836	1.69564415524e-05	2.32131564759994	0.998548687598205	-0.577301	8.9485337881e-06	3.58469751722432	0.99893592301966	2.99536765008179	2.41806710132996	1.24914e-17
rs6019663	3.6896263056e-06	-3.84979	0.99968384358433	3.37848070960614	1.9677636729e-06	-2.53531	0.999765817327891	-0.966571	2.41190961690557	1.24147e-17
rs77400402	1.70143875225e-05	2.3776428233754	0.998543735189042	-0.443464	8.9841070225e-06	3.54379702070162	0.998931697498179	2.85169835633986	2.40823455158979	1.23692e-17
rs112970239	1.68211538496e-05	2.26374909786022	0.998560250285637	-0.713052	8.8759901476e-06	3.61546155756799	0.998944540134673	3.10199352458609	2.38894147674976	1.21328e-17
rs348302	3.7569681241e-06	-3.89495	0.999678075061385	3.56229456759601	2.0037534916e-06	-2.44514	0.999761535217087	-1.18201	2.38028605975034	1.20283e-17
rs348279	3.7563478969e-06	-3.89301	0.999678128189953	3.55464682468204	2.0034703936e-06	-2.44286	0.999761568900275	-1.18765	2.36699976419494	1.18695e-17
rs6067006	3.69139369e-06	3.84497475667517	0.999683692188734	3.36017995303766	1.9686334864e-06	2.50768309718619	0.999765713836029	-1.03598	2.32419692630075	1.13722e-17
rs6090948	3.7000446025e-06	3.8394374983754	0.999682951145141	3.34007595910142	1.9735192324e-06	2.51356757449353	0.999765132522213	-1.01998	2.32010042233571	1.13257e-17
rs1963119	3.7024686724e-06	3.8182810339989	0.99968274349771	3.25942236529267	1.9747556676e-06	2.54486002590268	0.999764985409297	-0.940536	2.31888614821424	1.13119e-17
rs78353492	1.69256542464e-05	2.33545045307821	0.99855131888549	-0.545337	8.9234833284e-06	3.5433948621126	0.99893889862816	2.84693822709674	2.30160098857987	1.11181e-17
rs6095343	1.222271521e-05	0.239294356568748	0.998953426153919	-3.40252	6.4370286369e-06	4.31097342272568	0.999234339352711	5.69774546589807	2.29522966922001	1.10475e-17
rs6125588	3.70293049e-06	3.8463077482721	0.999682703938118	3.36685695962848	1.97486809e-06	2.48887781968263	0.999764972033114	-1.08137	2.28548239697103	1.09403e-17
rs76400436	5.09380536681e-05	1.06982257474685	0.995652824029049	-2.14934	2.68641109636e-05	3.82229802471899	0.996812358875458	4.40745838917755	2.25811642084086	1.0645e-17
rs6067008	3.7034693136e-06	3.82545052067095	0.999682657782148	3.28694893126883	1.9753178116e-06	2.50610476285344	0.999764918524575	-1.03825	2.24870205069897	1.05452e-17
rs1963121	3.7162200625e-06	3.79948644793153	0.999681565546167	3.18970320834655	1.9819853089e-06	2.53283422004077	0.99976412521659	-0.969237	2.22046646743623	1.02517e-17
rs3092791	3.6975828681e-06	-3.77221	0.999683162019027	3.08396925099963	1.9722270096e-06	-2.56739	0.999765286272868	-0.8836	2.2003697441392	1.00477e-17
rs112531369	5.73477542089e-05	0.856902901557278	0.995108480529322	-2.29478	3.03130628329e-05	3.82447014292383	0.996404584623836	4.47294376047954	2.17816302627207	9.82702e-18
rs2426104	4.64014681e-06	-3.55638	0.999602427837816	2.40632462443098	2.4716556225e-06	-2.7308	0.999705867011535	-0.338197	2.0681277818824	8.80307e-18
rs151072670	2.505503025e-05	-1.73629	0.99785700978562	-1.56865	1.37294704089e-05	-3.68963	0.998368345801577	3.58650139903358	2.01785314005214	8.37144e-18
rs1963120	3.7154875536e-06	3.74514930793335	0.999681628293207	2.98469342150092	1.9816474441e-06	2.53381023080038	0.999764165416178	-0.96685	2.01784355507981	8.37136e-18
rs11698090	3.2072153569e-06	-3.16209	0.999725169016043	0.898351726506352	1.7086934089e-06	-3.2697	0.999796642893936	1.09409913958945	1.9924508660958	8.16146e-18
rs6067016	3.5673387876e-06	3.90312589345278	0.999694318944688	3.56838328635466	1.9004276736e-06	2.26384052924791	0.999773829142517	-1.6352	1.93318077853284	7.69179e-18
rs561950430	0.00024466590724	-0.00984145	0.979459227932541	-1.94262	0.00012424223296	-3.44575	0.985426065002743	3.73581427321731	1.79318996220939	6.68698e-18
rs571994329	0.00057455131204	-3.23464	0.953063819253668	3.45642390972197	0.000308108	-0.114226	0.964621204363398	-1.66453	1.79189558604504	6.67833e-18
rs77904763	3.31831298304e-05	1.48461933727745	0.997163774332761	-1.83372	1.76725229769e-05	3.6385996712553	0.997900724547362	3.52272569400249	1.68900677695161	6.02537e-18
rs79333383	1.41914944656e-05	-2.30751	0.99878505362145	-0.697461	7.7206735321e-06	-3.43061	0.999081794756249	2.38259785023006	1.68513721350455	6.0021e-18
rs565104116	0.00031579067025	0.995278692214625	0.973645362994842	-1.33582	0.00016011359296	-3.15876	0.981296960484787	2.90604403418064	1.57022516686107	5.35054e-18
rs78027104	2.55308888961e-05	1.88516488844821	0.997816397834215	-1.29035	1.363012561e-05	3.45813808608034	0.998380133130503	2.75696808860786	1.46662162519082	4.82396e-18
rs113305992	5.358972025e-05	1.25986339730893	0.995427559169057	-1.90385	2.84669199936e-05	3.53103024305399	0.996622815088203	3.36767723172818	1.46382224610833	4.81047e-18
rs6019361	1.4884164e-05	0.617509072058061	0.998725829129075	-3.14231	7.7499321769e-06	4.02349966054449	0.999078318287573	4.59215911003241	1.44984510066309	4.7437e-18
rs151282715	2.52589671889e-05	2.15279864221432	0.997839604470524	-0.756467	1.34642761969e-05	3.28228006442523	0.998399811897992	2.15924446103333	1.4027772568152	4.5256e-18
rs238181	4.1151773881e-06	-1.76514	0.999647391853548	-2.41776	2.1902816016e-06	-3.98515	0.999739342471673	3.81248189005559	1.39471963613254	4.48928e-18
rs761383	4.0640140836e-06	-1.25118	0.999651774244406	-3.19888	2.17415025e-06	-4.17564	0.999741261709045	4.58587895417975	1.38699993902888	4.45476e-18
rs13041163	1.36822311025e-05	-2.59765	0.998828601036647	-0.0048289	7.300804e-06	-3.12754	0.999131685694698	1.36202454985284	1.3571956528386	4.32395e-18
rs140785728	0.00037393890625	2.86006464124111	0.968943254648812	2.22699363094746	0.00018182364964	1.44636685899052	0.97881471097615	-0.903395	1.3235984806191	4.18109e-18
rs557511952	0.000153834	-0.070879	0.986985685859381	-2.16837	7.78555640164e-05	3.42723701717444	0.990817375950699	3.47382631254725	1.30545281689632	4.1059e-18
rs34939089	1.38219624841e-05	-2.0233	0.998816652144501	-1.32525	7.4590710769e-06	-3.45881	0.999112879046302	2.4626251831002	1.13737360704284	3.47067e-18
rs113544434	2.46508278016e-05	1.96354451999613	0.9978915088664	-1.1572	1.31276507041e-05	3.31730702885011	0.998439756389126	2.26222143664964	1.10501898147352	3.36017e-18
rs76104771	2.50641410881e-05	1.8988396875206	0.997856232194021	-1.27366	1.33643618329e-05	3.34543305988134	0.998411667554304	2.36453763767174	1.09087377038332	3.31297e-18
rs113702744	4.96789557889e-05	1.17692985430591	0.99575982284346	-2.04193	2.63301370641e-05	3.47121289188489	0.996875521171606	3.12159165712228	1.07966181377123	3.27604e-18
rs35655561	1.90371651856e-05	-2.33086	0.998370887294865	-0.497839	1.03061545024e-05	-3.12916	0.998774685114263	1.53753872040177	1.03969953480648	3.1477e-18
rs34230946	1.36640383201e-05	-2.57811	0.998830156782618	-0.0559965	7.2870842916e-06	-3.03735	0.999133316021199	1.08333	1.02732973302302	3.109e-18
rs6066836	3.1393106761e-06	-2.37292	0.999730986302301	-1.29575	1.6678172736e-06	-3.62711	0.999801506728824	2.31429432926076	1.01854634527281	3.08182e-18
rs71351970	1.36712844009e-05	-2.59904	0.998829537137348	-0.00162147	7.2921061521e-06	-3.01526	0.999132719267938	1.01687107630983	1.01524960967011	3.07167e-18
rs6095462	3.6709410409e-06	3.63790664780764	0.999685444182222	2.58292640758425	1.95692121e-06	2.25579383801558	0.999767107384023	-1.63876	0.944170234900278	2.86092e-18
rs182193755	0.00010865143696	-3.28518	0.990772872421946	3.00360791125182	5.89329511684e-05	-0.895611	0.993033643640855	-2.08507	0.918542204318694	2.78853e-18
rs140400428	0.00016939282801	0.234018178884526	0.985688288952112	-2.09635	8.70908900625e-05	-3.27165	0.989739297920858	3.00723151540255	0.910883321279983	2.76726e-18
rs6019692	4.4174791684e-06	1.46187041460096	0.999621498990517	-2.87152	2.3495984656e-06	3.95150831136975	0.9997203880466	3.71397208009758	0.842454284975981	2.58423e-18
rs146936246	0.00026157886756	2.51223614082382	0.978070449146922	1.17650279400415	0.00012707376529	1.8939384530769	0.985098868295271	-0.336383	0.840119967185885	2.5782e-18
rs13044228	1.37588323041e-05	-2.61116	0.998822050579386	0.0330797441125106	7.3355930649e-06	-2.94238	0.999127551699601	0.802930366279594	0.836010110392104	2.56763e-18
rs6063375	4.4174371329e-06	1.46288128577342	0.999621502590864	-2.87004	2.3495984656e-06	3.94808329636492	0.9997203880466	3.70044775282456	0.830402919535262	2.55327e-18
rs6019687	4.4174791684e-06	1.45800702261892	0.999621498990517	-2.87716	2.3495984656e-06	3.94968816053861	0.9997203880466	3.7067834060363	0.829627430240093	2.55129e-18
rs4810936	4.4174371329e-06	1.45809008597515	0.999621502590864	-2.87704	2.3495984656e-06	3.94955115993842	0.9997203880466	3.70624245707042	0.829202793585157	2.55021e-18
rs6512575	4.4174791684e-06	1.45496674247543	0.999621498990517	-2.88158	2.3495984656e-06	3.94945982620495	0.9997203880466	3.70588183485089	0.824299406957383	2.53774e-18
rs4810932	4.4177734225e-06	1.46212622213764	0.99962147378761	-2.87111	2.3497210944e-06	3.94488153019154	0.999720373457345	3.68784154622202	0.81673086473606	2.5186e-18
rs4810935	4.41756324e-06	1.45814539918165	0.999621491789772	-2.87694	2.3496291225e-06	3.94616563916887	0.999720384399322	3.6928871312271	0.815942347079053	2.51662e-18
rs4810933	4.4178995344e-06	1.45278036805146	0.999621462986108	-2.88471	2.3499050436e-06	3.94415306535155	0.99972035157275	3.68500786762409	0.800295452502431	2.47755e-18
rs2426153	3.8867333904e-06	-1.3593	0.99966695951253	-3.08008	2.0774898225e-06	-4.00737	0.999752762096589	3.87493456082851	0.794856868705816	2.46411e-18
rs6012616	4.4175212041e-06	1.45780025597229	0.999621495390153	-2.87745	2.3496597796e-06	3.94075127539371	0.99972038075202	3.67154827639864	0.794095721087326	2.46223e-18
rs149086752	0.00034982091225	2.94729328735263	0.9708880128406	2.44852504365633	0.00018912575529	-0.690188	0.977982634435161	-1.67503	0.773498675018805	2.41204e-18
rs57135563	1.51303884484e-05	0.394153396850207	0.998704778187463	-3.24696	7.8715596969e-06	3.85866988875939	0.999063866945793	3.95082098684605	0.70386216880467	2.24979e-18
rs56048107	1.54907577889e-05	0.288300053610039	0.998673970036266	-3.27128	8.0451082321e-06	3.86209230747535	0.999043247260727	3.97476036477019	0.703480822267581	2.24893e-18
rs34816900	1.274632804e-05	-2.58449	0.998908640570722	-0.0740279	6.7996820644e-06	-2.93032	0.999191237961498	0.729911242819576	0.655883305362904	2.14439e-18
rs1883745	3.1038687684e-06	-2.06807	0.999734022581186	-1.97815	1.6520475024e-06	-3.71385	0.999803383180203	2.62787054850979	0.649715570893501	2.13121e-18
rs4810851	1.51172438481e-05	0.401353878125249	0.998705901961703	-3.24453	7.8651641601e-06	3.84116185117437	0.999064626829918	3.88307919238721	0.638546769270914	2.10754e-18
rs6019365	1.554330625e-05	0.384778693722258	0.998669477801411	-3.23716	8.0929439361e-06	3.83315581708445	0.999037563944634	3.86644971735677	0.629286652288727	2.08811e-18
rs2426089	3.1061947536e-06	-2.0689	0.999733823315394	-1.97607	1.6534102225e-06	-3.69797	0.999803221029316	2.56941728384319	0.593343620330401	2.01439e-18
rs238148	4.4067665929e-06	-1.40393	0.999622416525041	-2.95572	2.3437160464e-06	-3.90196	0.999721087883612	3.51821931034688	0.562502842313801	1.95321e-18
rs6019406	3.1044325636e-06	-2.05765	0.999733974281174	-1.99956	1.6523045764e-06	-3.69191	0.999803352590808	2.54672493055955	0.547169597990065	1.92349e-18
rs2426092	3.1061242564e-06	-2.04521	0.999733829354847	-2.0248	1.6533845056e-06	-3.69841	0.999803224089385	2.57103989086697	0.546239867222051	1.9217e-18
rs60888246	4.4202960025e-06	1.43946348307926	0.999621257728316	-2.90369	2.3510395561e-06	3.87913729121965	0.99972021659884	3.43100060214613	0.527308471201944	1.88567e-18
rs117547317	0.00018491376289	0.467941580932911	0.984397411899301	-1.97238	9.43165341889e-05	-3.09596	0.988897452846191	2.48897182344566	0.51658900365252	1.86556e-18
rs7274977	3.1054898176e-06	-2.02388	0.999733883706841	-2.06828	1.6528187844e-06	-3.70136	0.999803291404886	2.58178486326546	0.513505247070544	1.85982e-18
rs6019697	4.4201698564e-06	1.4405589748956	0.999621268532743	-2.90213	2.3509782241e-06	3.87415948711594	0.999720223895559	3.41169581956724	0.509566359112225	1.85251e-18
rs555706235	0.00045251074729	-2.82351	0.962661286587458	2.19341221522377	0.00024296392129	0.451006909471172	0.971891158033153	-1.68699	0.50642151484611	1.84669e-18
rs2426096	3.1059832644e-06	-2.04717	0.999733841433547	-2.02082	1.6533073561e-06	-3.68636	0.999803233269449	2.5265464004731	0.50573032531954	1.84541e-18
rs761499	4.4074383721e-06	-1.39578	0.99962235898695	-2.96705	2.3440834816e-06	-3.88974	0.999721044169468	3.47070604559071	0.503658108862314	1.84159e-18
rs238162	4.4099160004e-06	-1.40444	0.999622146777399	-2.95465	2.3454309904e-06	-3.88613	0.999720883854991	3.45695335064251	0.502300238112128	1.83909e-18
rs238149	4.4068925476e-06	-1.40717	0.999622405736982	-2.95116	2.3437772836e-06	-3.88403	0.999721080598159	3.44843	0.497270242103336	1.82987e-18
rs117320070	0.00011269520964	-3.14544	0.990432744117073	2.57487491072446	6.113832481e-05	-0.869575	0.992774834008217	-2.08974	0.485130593857414	1.80779e-18
rs238156	4.4052972544e-06	-1.43402	0.999622542374348	-2.9132	2.34273636e-06	-3.87111	0.999721204437931	3.3981390305674	0.484934285394006	1.80743e-18
rs238153	4.4053392321e-06	-1.42768	0.999622538778944	-2.92227	2.34273636e-06	-3.87305	0.999721204437931	3.4056503791708	0.483383998814193	1.80463e-18
rs238168	4.4099160004e-06	-1.38364	0.999622146777399	-2.98364	2.34549225e-06	-3.88838	0.999720876566876	3.46572648380629	0.482088080056551	1.80229e-18
rs761497	4.4069765184e-06	-1.39995	0.999622398544858	-2.96128	2.3438385216e-06	-3.8819	0.999721073312611	3.44018223490046	0.47890188780562	1.79656e-18
rs238154	4.4054231881e-06	-1.43469	0.999622531588086	-2.91224	2.3427975844e-06	-3.86802	0.999721197153999	3.38620396068577	0.473967800728798	1.78772e-18
rs238163	4.4104620121e-06	-1.38566	0.999622100011357	-2.98078	2.3457679281e-06	-3.8843	0.999720843769181	3.44990506643078	0.469123046123408	1.77908e-18
rs238167	4.4098320016e-06	-1.38319	0.999622153971917	-2.98427	2.3454309904e-06	-3.88512	0.999720883854991	3.45302183621618	0.468753366780258	1.77842e-18
rs238165	4.4103780081e-06	-1.38747	0.999622107206321	-2.97828	2.3457066649e-06	-3.88335	0.999720851057724	3.44621025281043	0.467931772557655	1.77696e-18
rs75665697	0.00010457721169	-0.90192	0.991115798480556	-1.95862	5.66674717284e-05	3.1500123542399	0.993299647479293	2.42524896176897	0.46662459717423	1.77464e-18
rs6417285	4.4164703716e-06	-1.40502	0.99962158539412	-2.9531	2.3486482009e-06	-3.87434	0.999720501100429	3.41189564308105	0.458798841490611	1.76081e-18
rs7261585	1.55221816324e-05	0.333994954084197	0.998671283686611	-3.25607	8.0635553296e-06	3.79178346550971	0.999041055570342	3.70707853901776	0.451009752427491	1.74714e-18
rs4810853	1.55227332121e-05	0.334121003378267	0.998671236533504	-3.25601	8.06389609e-06	3.79156248899532	0.99904101508486	3.70626228975597	0.450253295900188	1.74582e-18
rs2426099	3.1072875625e-06	-2.05899	0.999733729695122	-1.99634	1.6539246025e-06	-3.66439	0.999803159822943	2.44599978797884	0.449662268414519	1.74479e-18
rs2281286	3.1062300025e-06	-2.02161	0.999733820295642	-2.07277	1.6532044929e-06	-3.67563	0.999803245509202	2.48703682858192	0.414269445455711	1.68412e-18
rs6066839	3.1066177536e-06	-2.02318	0.99973378707724	-2.06952	1.6535130921e-06	-3.67261	0.999803208788802	2.47601426194001	0.406495453866211	1.67108e-18
rs173204	4.4050453924e-06	-1.42903	0.999622563946411	-2.92038	2.3425526916e-06	-3.84826	0.999721226289156	3.30994	0.389562330635501	1.64302e-18
rs1051295	3.8763309456e-06	-1.38151	0.999667850565306	-3.051	2.0713542084e-06	-3.89653	0.999753492103739	3.43555988981806	0.384563564754236	1.63483e-18
rs6067028	4.4051713225e-06	-1.42772	0.999622553160457	-2.92224	2.3426751364e-06	-3.84513	0.999721211721767	3.29792477299256	0.375684987750914	1.62038e-18
rs3746816	3.10675876e-06	-2.01528	0.999733774997308	-2.08545	1.6535645281e-06	-3.66725	0.999803202668402	2.4563600488082	0.370908915478295	1.61265e-18
rs6019397	3.1070407824e-06	-2.01138	0.999733750836621	-2.09325	1.6536931216e-06	-3.66536	0.999803187366988	2.44949111174999	0.356239097336287	1.58917e-18
rs6095281	3.1058422756e-06	-2.01046	0.999733853511973	-2.0953	1.65302449e-06	-3.6658	0.999803266927854	2.45089428540908	0.35559461986325	1.58815e-18
rs85360	4.4219360656e-06	-1.34794	0.999621117256756	-3.03102	2.3521436689e-06	-3.86702	0.999720085241644	3.38430976004944	0.35329340776191	1.5845e-18
rs237719	4.4216416729e-06	-1.34498	0.999621142471516	-3.03503	2.3519903044e-06	-3.8669	0.999720103487541	3.38383201468662	0.348797476469005	1.57739e-18
rs238203	4.4049194641e-06	-1.42587	0.999622574732212	-2.9249	2.3425526916e-06	-3.83777	0.999721226289156	3.26962999854189	0.344728814173692	1.57098e-18
rs237704	4.4074383721e-06	-1.41609	0.99962235898695	-2.9385	2.3437160464e-06	-3.84046	0.999721087883612	3.28021020496177	0.341706994476954	1.56624e-18
rs238204	4.4049194641e-06	-1.42585	0.999622574732212	-2.92493	2.3425526916e-06	-3.83603	0.999721226289156	3.2629384646719	0.338010115670621	1.56046e-18
rs570233	4.4039960449e-06	-1.39446	0.99962265382338	-2.96928	2.3420935521e-06	-3.84576	0.999721280913476	3.30021416006649	0.330938217311683	1.54947e-18
rs3935548	3.13542882601e-05	1.38519222286315	0.997319669950131	-2.0041	1.66804445889e-05	3.30346190290806	0.99801833756214	2.33370788333042	0.329607509232621	1.54741e-18
rs76039345	0.00010042244521	-1.00426	0.991465748222342	-1.88187	5.40072130816e-05	3.08748448760097	0.993612186746031	2.20915248109047	0.327285204690249	1.54382e-18
rs6095279	3.1061595049e-06	-2.01125	0.999733826335129	-2.09366	1.6531787776e-06	-3.65728	0.99980324856908	2.41976407338664	0.326099837004843	1.54199e-18
rs190220	4.4044997161e-06	-1.41488	0.999622610683769	-2.94055	2.3422772025e-06	-3.83675	0.99972125906439	3.26567472392556	0.32512003140599	1.54048e-18
rs76743439	1.72364468224e-05	0.810286438261138	0.998524757128026	-2.93167	9.0836534881e-06	3.64742145584971	0.998919873187638	3.22931839284863	0.297649831210737	1.49874e-18
rs36102365	1.34610473449e-05	-2.51217	0.998847515775054	-0.231046	7.1623140625e-06	-2.84559	0.999148142834989	0.511196219164134	0.280150533631983	1.47274e-18
rs58018681	1.37020646569e-05	0.3641422832644	0.998826904986466	-3.30783	7.1226001924e-06	3.77601336920437	0.999152862243461	3.58627550182789	0.278442671024179	1.47022e-18
rs531507003	0.00049602416656	-2.41164	0.959217227194525	1.18965107054038	0.00027605490201	1.29220759679565	0.968184615555227	-0.915565	0.274085975841858	1.46383e-18
rs238213	4.4044577424e-06	-1.41345	0.999622614278831	-2.94258	2.3423078116e-06	-3.82377	0.999721255422792	3.21597077712612	0.273386645045633	1.46281e-18
rs2869728	4.4123943249e-06	-1.41717	0.999621934508307	-2.93642	2.34641124e-06	-3.82133	0.999720767233742	3.20752703384298	0.271108002686408	1.45948e-18
rs238209	4.4044577424e-06	-1.41932	0.999622614278831	-2.93427	2.3422772025e-06	-3.82061	0.99972125906439	3.20387568482745	0.269609835494617	1.4573e-18
rs171131	4.4044577424e-06	-1.40994	0.999622614278831	-2.94753	2.3423078116e-06	-3.82378	0.999721255422792	3.21599575464495	0.268462734272465	1.45563e-18
rs238211	4.4044577424e-06	-1.40994	0.999622614278831	-2.94753	2.3423078116e-06	-3.82377	0.999721255422792	3.21594579964996	0.26841277927747	1.45555e-18
rs238214	4.4044997161e-06	-1.40992	0.999622610683769	-2.94755	2.3423078116e-06	-3.82296	0.999721255422792	3.21287389556811	0.265322734893593	1.45106e-18
rs742643	1.41182050564e-05	0.845074545831981	0.998791320408814	-3.00247	7.3515815044e-06	3.6842050911344	0.999125651799976	3.25973372047492	0.257264243533931	1.43942e-18
rs1109693	4.4114281156e-06	-1.41412	0.999622017264356	-2.94084	2.3458904569e-06	-3.81877	0.999720829191811	3.19761649029157	0.256773341611114	1.43871e-18
rs6019348	1.40833577284e-05	0.799974951902323	0.998794300141069	-3.04075	7.3412818704e-06	3.69211066330071	0.999126875700378	3.28817318394876	0.247419803568254	1.42531e-18
rs238220	4.4044577424e-06	-1.41022	0.999622614278831	-2.94714	2.34243025e-06	-3.81292	0.999721240856164	3.17456178477539	0.227425029083001	1.3971e-18
rs238218	4.4044577424e-06	-1.40697	0.999622614278831	-2.95171	2.34243025e-06	-3.81349	0.999721240856164	3.17675367294591	0.225041187748615	1.39377e-18
rs10485610	1.36925161156e-05	-2.49478	0.998827721521446	-0.266077	7.2965354641e-06	-2.83219	0.999132192928465	0.482399112104244	0.216322268096953	1.38167e-18
rs2746989	4.4046676129e-06	-1.40799	0.999622596303352	-2.95025	2.34243025e-06	-3.80971	0.999721240856164	3.16233811165407	0.212083805537401	1.37583e-18
rs78614237	4.25908948689e-05	1.48845494371124	0.996362599467483	-1.70452	2.26914086025e-05	3.12489634831166	0.997306149514955	1.91094404869147	0.206420785465418	1.36806e-18
rs238155	4.4070185041e-06	-1.39765	0.99962239494877	-2.96448	2.3438691409e-06	-3.81049	0.999721069669801	3.16560312988737	0.201121085448827	1.36083e-18
rs238184	4.4043737956e-06	-1.4111	0.999622621468903	-2.94591	2.3423384209e-06	-3.80565	0.999721251781171	3.14688361213095	0.200972458140515	1.36063e-18
rs6012504	1.410453136e-05	0.771245606560869	0.998792489619846	-3.06255	7.3475149969e-06	3.68390005275526	0.999126135020688	3.25833779619338	0.195791275443339	1.3536e-18
rs238178	4.4047515625e-06	-1.41547	0.99962258911304	-2.93969	2.3425833025e-06	-3.8026	0.999721222647345	3.13532071105956	0.195627084726861	1.35337e-18
rs238180	4.4042898496e-06	-1.41205	0.999622628658906	-2.94458	2.3423078116e-06	-3.8039	0.999721255422792	3.14018670985585	0.195609558741454	1.35335e-18
rs238192	4.4060109025e-06	-1.39	0.999622481250159	-2.97527	2.3432261776e-06	-3.80926	0.999721146163814	3.16081414431432	0.185547992742755	1.3398e-18
rs237737	4.4043318225e-06	-1.36519	0.999622625063913	-3.00962	2.3423996401e-06	-3.81765	0.999721244497857	3.1925938197777	0.182974455742874	1.33636e-18
rs512653	4.4102100025e-06	-1.38476	0.999622121596043	-2.98205	2.3456760336e-06	-3.80984	0.99972085470196	3.16352907228796	0.181480989258122	1.33436e-18
rs237703	4.4076483136e-06	-1.36686	0.999622341005399	-3.00695	2.3439303801e-06	-3.81641	0.999721062384111	3.18821118282632	0.181258215927674	1.33407e-18
rs761270	1.40461547524e-05	0.755404475134878	0.998797481320164	-3.07669	7.3145907025e-06	3.6843245641604	0.99913004741258	3.25768334866322	0.180989698044202	1.33371e-18
rs238191	4.4056750609e-06	-1.39154	0.999622510015099	-2.97315	2.3429812624e-06	-3.80589	0.999721175301633	3.14791707158278	0.174766268930302	1.32543e-18
rs237735	4.4048355129e-06	-1.35932	0.99962258192266	-3.01755	2.3426751364e-06	-3.81745	0.999721211721767	3.19189537391816	0.17435005532763	1.32488e-18
rs745086	3.1618174225e-06	2.5984759440992	0.999729058177548	-0.731679	1.6807826025e-06	3.2141154691658	0.999799963984432	0.905729319816429	0.174050007077736	1.32448e-18
rs6019796	1.33845490801e-05	-2.63584	0.998854057763312	0.0840927271516789	7.1261234704e-06	-2.69417	0.999152443551966	0.0896305481228397	0.173723275274519	1.32405e-18
rs563679277	0.00030421987561	-0.44736	0.974586474991722	-1.73871	0.00016521246225	-2.81277	0.980712843640728	1.90539578976169	0.166681415238885	1.31476e-18
rs237701	4.4042898496e-06	-1.36577	0.999622628658906	-3.00883	2.3423690304e-06	-3.8131	0.999721248139526	3.17526175384646	0.166426992366503	1.31443e-18
rs238185	4.4042898496e-06	-1.42203	0.999622628658906	-2.93044	2.3423384209e-06	-3.79176	0.999721251781171	3.09410508903426	0.16366163967416	1.3108e-18
rs180845	4.4056330816e-06	-1.393	0.999622513610639	-2.97112	2.3429812624e-06	-3.80164	0.999721175301633	3.13176896002517	0.160644976139042	1.30685e-18
rs238186	4.4055911025e-06	-1.39252	0.999622517206163	-2.97181	2.3429506489e-06	-3.80162	0.999721178943753	3.13168304159192	0.15987370629263	1.30584e-18
rs6019342	1.402652304e-05	0.796571611662928	0.998799160011055	-3.04548	7.3023171984e-06	3.66087896146957	0.999131505880163	3.17082271967573	0.12533791549225	1.26151e-18
rs238202	4.4141169604e-06	-1.38946	0.999621786964214	-2.9751	2.3474223369e-06	-3.79105	0.999720646942589	3.09250198965881	0.117404908330891	1.25154e-18
rs6019345	1.40254744036e-05	0.791554741446065	0.998799249679213	-3.0495	7.3019388841e-06	3.65913826090496	0.999131550835537	3.16443169284821	0.114930651663724	1.24845e-18
rs73264234	0.00072718133569	1.62100473554029	0.94132675983207	-0.181144	0.00035601651856	1.98351211549469	0.959343694695777	0.285882020775115	0.104737875682374	1.23579e-18
rs238179	4.4166805281e-06	-1.40392	0.999621567394182	-2.95462	2.3493225625e-06	-3.77997	0.999720420871032	3.0509790870277	0.0963627215217944	1.22548e-18
rs238169	4.1999173969e-06	-1.59631	0.99964013353591	-2.69124	2.235025e-06	-3.7128	0.999734019137189	2.77455066740866	0.0833063408775496	1.20959e-18
rs238152	4.1972126641e-06	-1.63756	0.999640365205367	-2.62489	2.2336797025e-06	-3.69411	0.999734179192791	2.7050613339282	0.0801733190936522	1.2058e-18
rs238172	4.1978682769e-06	-1.59738	0.999640309049917	-2.68978	2.2338590521e-06	-3.70945	0.999734157854825	2.76187408119688	0.0720986388345253	1.19611e-18
rs13042468	1.35303322896e-05	-2.53141	0.998841590730368	-0.180059	7.1974694961e-06	-2.75201	0.99914396516675	0.251938213267441	0.0718792923347618	1.19584e-18
rs171130	4.1999993721e-06	-1.59368	0.99964012651446	-2.69542	2.2350848004e-06	-3.71069	0.999734012022489	2.76675970235627	0.0713379901005657	1.1952e-18
rs4810952	3.2651767204e-06	-2.29672	0.999720203611556	-1.45401	1.7384949904e-06	-3.39569	0.999793096845575	1.5225192196458	0.0685094160794066	1.19182e-18
rs4809715	1.409101444e-05	0.782857371197187	0.998793645427926	-3.05401	7.3468644601e-06	3.63851821243973	0.99912621232364	3.09228686200065	0.0382739185749319	1.15632e-18
rs1961192	3.2655019849e-06	-2.32415	0.999720175747102	-1.3906	1.7387850769e-06	-3.36699	0.999793062328713	1.42560664227679	0.0350108459946519	1.15256e-18
rs3091458	3.6298632484e-06	-1.24634	0.999688962963776	-3.26135	1.9368845584e-06	-3.8636	0.99976949139036	3.27437254771565	0.0130186866210043	1.12749e-18
rs238215	4.3171697284e-06	-1.17047	0.999630090582785	-3.26638	2.2952553001e-06	-3.84263	0.999726853342019	3.27812790073735	0.0117487978491764	1.12606e-18
rs552750508	0.00043730756161	-2.29157	0.96387044642919	0.870452317137783	0.00024443759025	1.37603377146695	0.971725487718995	-0.862931	0.00752107871801866	1.12131e-18
rs73126661	5.504749636e-05	-1.93117	0.995303761325894	-0.824551	2.964366916e-05	2.70739815597105	0.996483701850389	0.826941893964894	0.00239099428739653	1.11557e-18
rs3092235	3.62864401e-06	-1.29695	0.999689067405833	-3.19719	1.93627225e-06	-3.84381	0.999769564244383	3.19796164216729	0.00077254519711234	1.11376e-18
rs238206	4.1957786896e-06	-1.65196	0.999640488030147	-2.60139	2.2325439889e-06	-3.66569	0.999734314313371	2.60024837494971	-0.00113682	1.11164e-18
rs555133	4.2131257081e-06	-1.62009	0.999639002201197	-2.65144	2.2421468644e-06	-3.6741	0.999733171820407	2.63326669886721	-0.0181731	1.09286e-18
rs119716	4.2110323264e-06	-1.58026	0.999639181505962	-2.71541	2.2411287616e-06	-3.68414	0.999733292948093	2.66994176687766	-0.0454656	1.06344e-18
rs78421082	3.16528886881e-05	1.20925545094373	0.997294213077275	-2.22701	1.68323934529e-05	3.25337031683781	0.998000321901414	2.17424196335035	-0.0527682	1.0557e-18
rs2426154	3.6523796544e-06	-1.42479	0.999687034173661	-3.02002	1.9492906689e-06	-3.78054	0.999768015281802	2.96017338685778	-0.0598428	1.04826e-18
rs3091737	3.6307778116e-06	-1.25734	0.999688884620735	-3.24746	1.9374969636e-06	-3.84045	0.999769418524829	3.18535805234555	-0.0621034	1.04589e-18
rs237721	4.21193529e-06	-1.57717	0.999639104164265	-2.72017	2.24160784e-06	-3.67837	0.999733235950252	2.64881154981904	-0.0713622	1.03625e-18
rs238210	4.1950003489e-06	-1.64168	0.999640554697681	-2.61841	2.2320957604e-06	-3.6461	0.999734367640994	2.52854285912048	-0.089867	1.01725e-18
rs237710	4.22220304e-06	-1.56369	0.99963822469975	-2.74012	2.24730081e-06	-3.67793	0.999732558635715	2.64848317275779	-0.0916321	1.01546e-18
rs237702	4.1962293409e-06	-1.63753	0.999640449430331	-2.62506	2.2328129476e-06	-3.64718	0.99973428231423	2.53264296946062	-0.0924156	1.01466e-18
rs171109	4.2116890176e-06	-1.60814	0.999639125258276	-2.6709	2.2415180089e-06	-3.65769	0.999733246637811	2.57296150212253	-0.0979372	1.00908e-18
rs149279131	5.27107944484e-05	3.24287693761346	0.995502214538423	2.53239043470723	2.82193625961e-05	0.643860629984997	0.996652085838037	-2.64312	-0.110734	9.96246e-19
rs8197	4.1961883716e-06	-1.63843	0.999640452939491	-2.62359	2.2328129476e-06	-3.64039	0.99973428231423	2.50792294254506	-0.115665	9.91346e-19
rs237734	4.1961883716e-06	-1.63832	0.999640452939491	-2.62376	2.2328129476e-06	-3.6404	0.99973428231423	2.50797165468265	-0.115792	9.9122e-19
rs237744	4.1968439044e-06	-1.63537	0.999640396790883	-2.62852	2.2331715844e-06	-3.64128	0.999734239645714	2.51122575046566	-0.117294	9.89732e-19
rs238175	4.1953690276e-06	-1.63523	0.999640523119092	-2.62893	2.2323945744e-06	-3.63913	0.999734332089839	2.50322583990919	-0.125701	9.81446e-19
rs238219	4.1950003489e-06	-1.64244	0.999640554697681	-2.61715	2.2322451649e-06	-3.63492	0.999734349865713	2.48791387831244	-0.129238	9.77981e-19
rs501182	4.1953690276e-06	-1.63518	0.999640523119092	-2.629	2.2323945744e-06	-3.63716	0.999734332089839	2.4960932585329	-0.132906	9.744e-19
rs238188	4.1962293409e-06	-1.62158	0.999640449430331	-2.65104	2.2328428329e-06	-3.63903	0.999734278758651	2.50297070080367	-0.148067	9.59738e-19
rs238187	4.1962703104e-06	-1.61884	0.999640445921154	-2.65547	2.2328428329e-06	-3.63951	0.999734278758651	2.50472378236339	-0.150742	9.57175e-19
rs238176	4.1949593856e-06	-1.64465	0.999640558206327	-2.61353	2.2321555216e-06	-3.62492	0.999734360530953	2.45160294339972	-0.161923	9.46533e-19
rs238189	4.1962703104e-06	-1.61821	0.999640445921154	-2.65649	2.2328428329e-06	-3.63647	0.999734278758651	2.49367351173255	-0.162819	9.45684e-19
rs238177	4.1949593856e-06	-1.64462	0.999640558206327	-2.61358	2.2321555216e-06	-3.62445	0.999734360530953	2.44990512531448	-0.163677	9.44874e-19
rs111961401	9.21897624025e-05	-0.670523	0.992159905234192	-2.20121	4.973493529e-05	3.04180196531628	0.994114525110234	2.03141782240432	-0.169796	9.39109e-19
rs238221	4.19471361e-06	-1.6443	0.999640579257847	-2.61413	2.2321256409e-06	-3.62028	0.999734364085985	2.43478834578487	-0.179345	9.30184e-19
rs143385574	7.00028402329e-05	-1.60774	0.994035493764687	-1.27626	3.79799805841e-05	2.76215804854619	0.995499308599112	1.09582736692217	-0.18043	9.29176e-19
rs238182	4.40664064e-06	-1.39944	0.999622427312945	-2.96203	2.34365481e-06	-3.70706	0.99972109516897	2.77691502367816	-0.185115	9.24833e-19
rs62212763	6.6134865889e-06	3.40787892692297	0.999433446012962	2.06556042222286	3.5080540804e-06	1.81087358113808	0.99958258457348	-2.25177	-0.186207	9.23824e-19
rs173205	4.1950822761e-06	-1.63966	0.999640547680336	-2.62171	2.23233481e-06	-3.61972	0.99973433920026	2.43281629490323	-0.188893	9.21345e-19
rs238183	4.1956148224e-06	-1.6375	0.99964050206593	-2.62518	2.2325141056e-06	-3.62051	0.999734317868712	2.43569709831305	-0.189478	9.20807e-19
rs113334305	8.93728218384e-05	-0.819016	0.992397645106577	-2.1068	4.79793114241e-05	3.00299853754524	0.994321100264378	1.89789506196164	-0.20891	9.03087e-19
rs74442232	1.41187311001e-05	0.69852215175556	0.998791275427901	-3.11542	7.3458887089e-06	3.58569989632259	0.999126328271672	2.90160244319006	-0.213821	8.98662e-19
rs144158111	2.15907986281e-05	2.97351391020081	0.998152762807905	1.26569396714546	1.15717669929e-05	1.90588318296867	0.99862442144292	-1.48074	-0.215049	8.97559e-19
rs61748373	6.146403201e-05	-1.6167	0.994759219587131	-1.32563	3.33350343225e-05	2.78593264226269	0.996047566968599	1.09866012967687	-0.226965	8.86927e-19
rs237699	4.194304e-06	-1.68758	0.999640614342345	-2.54211	2.2318268449e-06	-3.58678	0.999734	2.31403223952557	-0.228077	8.85942e-19
rs148179697	0.00014115340864	1.51586593495388	0.988045667470803	-1.07814	7.37917078441e-05	2.54692260142651	0.991292511256953	0.843379511418818	-0.234761	8.8004e-19
rs2426152	3.8020320144e-06	-1.09012	0.999674214910483	-3.42065	2.0302545169e-06	-3.83387	0.99975838211749	3.18341025891822	-0.237235	8.77865e-19
rs238171	4.1971307161e-06	-1.53857	0.99964037222449	-2.78204	2.2332014721e-06	-3.6483	0.99973423608985	2.53681926192561	-0.245223	8.70881e-19
rs73324998	1.69198950244e-05	0.779825836659876	0.998551811108324	-2.9651	8.8728919876e-06	3.50460261721399	0.998944908153717	2.70757657803647	-0.25752	8.60237e-19
rs137937401	2.24817274201e-05	2.83446764624622	0.998076684497009	0.882524882668173	1.20284806041e-05	2.06562174724137	0.998570207839219	-1.14477	-0.262242	8.56185e-19
rs3787315	1.34883580225e-05	-2.47134	0.998845180237841	-0.331669	7.1776303921e-06	-2.67915	0.99914632272674	0.0528823533646103	-0.278787	8.42136e-19
rs238199	4.2027050025e-06	-1.68684	0.999639894768232	-2.54236	2.2361314369e-06	-3.57026	0.999733887499857	2.25588722046379	-0.286473	8.35688e-19
rs6012652	1.36460792836e-05	-2.42725	0.998831692544688	-0.433761	7.2686316816e-06	-2.70155	0.999135508771464	0.119339942122124	-0.314421	8.12655e-19
rs73124650	5.48763897796e-05	-1.67386	0.995318290511981	-1.28771	2.95856581329e-05	2.74531324975594	0.996490558902938	0.928998295709612	-0.358707	7.77451e-19
rs6019808	1.34706616576e-05	-2.42114	0.99884669358311	-0.454979	7.1630634321e-06	-2.6889	0.999148053783879	0.0780130711525566	-0.376966	7.63385e-19
rs6019794	1.36056224164e-05	-2.40492	0.998835152219868	-0.489124	7.2448720569e-06	-2.69464	0.999138332176116	0.0990998232868194	-0.390024	7.53481e-19
rs75223094	2.41507376356e-05	-1.46652	0.997934195360799	-2.018	1.31960733696e-05	-3.11647	0.998431636993136	1.61970328759636	-0.398295	7.47275e-19
rs3787314	1.36489608025e-05	-2.40769	0.998831446132073	-0.480902	7.2697640625e-06	-2.68574	0.999135374208731	0.0768679925796794	-0.404034	7.42998e-19
rs6019797	1.36474830625e-05	-2.40676	0.998831572500751	-0.483181	7.2685238404e-06	-2.68631	0.999135521586418	0.0783139837352302	-0.404867	7.4238e-19
rs6019789	1.30850763289e-05	-2.16141	0.998879668936223	-1.06384	6.96907201e-06	-2.89948	0.999171107225784	0.652290055102264	-0.411548	7.37437e-19
rs6019788	1.36531728004e-05	-2.40855	0.998831085943984	-0.478674	7.2718133569e-06	-2.68091	0.999135130687712	0.0640727279400903	-0.414602	7.35188e-19
rs6019800	1.364785249e-05	-2.40699	0.998831540909219	-0.482628	7.2689012881e-06	-2.68221	0.999135476733665	0.0673596518859942	-0.415268	7.34698e-19
rs6019799	1.364785249e-05	-2.40676	0.998831540909219	-0.483161	7.2688473664e-06	-2.6817	0.999135483141272	0.0659911641711535	-0.41717	7.33302e-19
rs11905015	1.36475569476e-05	-2.4069	0.998831566182479	-0.482843	7.2686856025e-06	-2.68123	0.999135502363952	0.0646986514700796	-0.418144	7.32589e-19
rs59670480	1.36477047184e-05	-2.40686	0.998831553545883	-0.482947	7.2687934449e-06	-2.68101	0.999135489548856	0.0641360666961464	-0.418811	7.321e-19
rs6019790	1.36496997025e-05	-2.40657	0.99883138294518	-0.483557	7.2699797641e-06	-2.67713	0.99913534857655	0.0538231169122629	-0.429734	7.24147e-19
rs6019792	1.364933025e-05	-2.40713	0.998831414538839	-0.482223	7.2697640625e-06	-2.67588	0.999135374208731	0.0504729827032144	-0.43175	7.22688e-19
rs13044985	1.36473352929e-05	-2.40618	0.998831585137244	-0.484586	7.2686856025e-06	-2.6756	0.999135502363952	0.0496409198701464	-0.434946	7.20383e-19
rs6019795	1.36472614084e-05	-2.40666	0.998831591455465	-0.483435	7.2686316816e-06	-2.67469	0.999135508771464	0.0472051109495886	-0.43623	7.19458e-19
rs6019793	1.36472614084e-05	-2.40675	0.998831591455465	-0.483227	7.2685238404e-06	-2.67461	0.999135521586418	0.0469930525582281	-0.436234	7.19455e-19
rs73314115	1.44571811076e-05	0.545007442941829	0.998762336104802	-3.19893	7.51966084e-06	3.54181678943914	0.999105679439577	2.75690055879142	-0.442032	7.15296e-19
rs6012655	1.347697521e-05	-2.44933	0.998846153664656	-0.38617	7.1721660481e-06	-2.63767	0.999146972078523	-0.0576727	-0.443842	7.14002e-19
rs6012653	1.36529511001e-05	-2.39259	0.998831104902631	-0.516941	7.2717054921e-06	-2.67902	0.99913514350546	0.0590048147183784	-0.457937	7.04009e-19
rs6012657	1.34766081025e-05	-2.42682	0.998846185058712	-0.441009	7.16579361e-06	-2.65142	0.999147729344147	-0.0217812	-0.46279	7.006e-19
rs6012654	1.34744789776e-05	-2.42456	0.998846367135839	-0.446577	7.1650440976e-06	-2.65025	0.999147818412169	-0.0249389	-0.471516	6.94514e-19
rs1997853	3.0865219225e-06	-1.52592	0.999735508677833	-2.95494	1.6403974084e-06	-3.67515	0.999804769434069	2.48138461167238	-0.473552	6.93101e-19
rs35560064	1.34782968384e-05	-2.41902	0.998846040642533	-0.459832	7.1672927524e-06	-2.65045	0.999147551194176	-0.0242421	-0.484074	6.85847e-19
rs6012656	1.34758739025e-05	-2.41851	0.998846247845545	-0.461146	7.1659006864e-06	-2.65071	0.999147716619765	-0.0236568	-0.484803	6.85347e-19
rs13037578	1.34695606081e-05	-2.39682	0.998846787742037	-0.513545	7.1631704881e-06	-2.66772	0.999148041061913	0.0213547888418311	-0.49219	6.80303e-19
rs6019805	1.34695606081e-05	-2.39681	0.998846787742037	-0.513564	7.1632240164e-06	-2.66735	0.999148034700894	0.020365976555154	-0.493198	6.79617e-19
rs8124661	4.8293139049e-06	1.6558107364043	0.999586226528868	-2.52481	2.5577285041e-06	3.48769141306455	0.9996956272484	2.03151577706901	-0.493293	6.79553e-19
rs189582429	0.00012221744704	-1.51683	0.989632734899417	-1.14609	6.59486919744e-05	-2.49083	0.992210785488097	0.650436765177537	-0.495648	6.77954e-19
rs183621565	0.000104653	0.471563049853373	0.991109425659009	-2.25118	5.66930690704e-05	2.92747971971504	0.993296641142349	1.75377112299534	-0.497413	6.76759e-19
rs192024941	7.16787436689e-05	2.49426847288022	0.993893572422661	0.542485738135212	3.70477951561e-05	-1.82738	0.995609289113597	-1.0518	-0.509317	6.6875e-19
rs6125578	6.5110708224e-06	3.43197030975671	0.999442214715386	2.14015695667537	3.4570708624e-06	1.5786201406966	0.99958864845595	-2.65252	-0.512366	6.66715e-19
rs6019807	1.34831433636e-05	-2.37238	0.998845626180891	-0.571252	7.1703986176e-06	-2.67505	0.999147182110164	0.0414207480571767	-0.529831	6.55171e-19
rs182571655	9.77946943744e-05	0.570629135858398	0.991687207333824	-2.23352	5.25974508081e-05	2.91264558953506	0.993777891763662	1.67553628158047	-0.557988	6.36981e-19
rs78357779	4.53984878656e-05	1.2508103487171	0.996123751358691	-1.99721	2.41180192201e-05	2.95371013294618	0.997137271765231	1.42172388624323	-0.575489	6.2593e-19
rs4810866	4.62852196e-06	1.76701217811658	0.999603423470945	-2.35577	2.4449700496e-06	3.42108797421401	0.999709041735178	1.77905	-0.57672	6.2516e-19
rs6012554	3.1025651881e-06	-2.80635	0.999734134258182	-0.179511	1.65096801e-06	-2.78134	0.999803511629693	-0.400274	-0.579785	6.23247e-19
rs6066908	3.0890523049e-06	-1.48912	0.999735291900812	-3.01	1.6417553161e-06	-3.65891	0.999804607855364	2.42225805536025	-0.58774	6.18309e-19
rs6019514	3.0877869841e-06	-1.49844	0.999735400300413	-2.99629	1.6410378609e-06	-3.65372	0.999804693226021	2.40307621402032	-0.593209	6.14936e-19
rs2426151	3.5986848804e-06	-1.09095	0.999691633763223	-3.44721	1.9205802225e-06	-3.75285	0.999771431325683	2.84850272469629	-0.598703	6.11568e-19
rs4810888	3.0872247025e-06	-1.50848	0.999735448470894	-2.98128	1.6406791921e-06	-3.6467	0.999804735904359	2.37732885440373	-0.603949	6.08367e-19
rs552265584	0.00063108473796	-0.74458	0.948682497784081	-1.22189	0.00034165086244	-2.15531	0.960920109513378	0.610845945990454	-0.611041	6.04068e-19
rs6019806	1.35424736001e-05	-2.36908	0.998840552448443	-0.576895	7.1999915584e-06	-2.64583	0.999143665460808	-0.0342264	-0.611121	6.0402e-19
rs8116229	4.6294686244e-06	1.75603033992991	0.999603342391937	-2.37501	2.4460021609e-06	3.41657448672289	0.999708918946802	1.76383732170329	-0.611172	6.03989e-19
rs4810885	3.0901420944e-06	-1.51116	0.999735198538936	-2.97676	1.6422678801e-06	-3.64267	0.999804546864908	2.36314	-0.613627	6.02508e-19
rs2024594	3.0956643025e-06	-2.79867	0.999734725453615	-0.202135	1.6469358889e-06	-2.77535	0.999803991414648	-0.418147	-0.620281	5.98512e-19
rs118085064	1.98510347025e-05	-2.76859	0.998301358404733	0.637063088273262	1.07830140625e-05	-2.03672	0.998718063211535	-1.25824	-0.621173	5.97979e-19
rs4810891	3.0871192804e-06	-1.49495	0.999735457502371	-3.00161	1.6406279569e-06	-3.64629	0.999804742000884	2.37581307893254	-0.625797	5.9522e-19
rs1997850	3.0870138601e-06	-1.49548	0.999735466533694	-3.00084	1.6405511056e-06	-3.64423	0.999804751145493	2.36830448529041	-0.632535	5.91223e-19
rs1997852	3.0870138601e-06	-1.49535	0.999735466533694	-3.00103	1.6405511056e-06	-3.64369	0.999804751145493	2.3663133902948	-0.634714	5.89936e-19
rs4810890	3.0872247025e-06	-1.49967	0.999735448470894	-2.99453	1.6406535744e-06	-3.64185	0.999804738952633	2.35964619641849	-0.634879	5.89838e-19
rs6019515	3.0877166961e-06	-1.49548	0.999735406321963	-3.00072	1.6409866201e-06	-3.64328	0.999804699323212	2.36496865741492	-0.635748	5.89326e-19
rs6019513	3.087049e-06	-1.49475	0.99973546352327	-3.00192	1.6405767225e-06	-3.64248	0.999804748097314	2.36192355063909	-0.639995	5.86829e-19
rs6012556	3.0879275625e-06	-1.49329	0.999735388257108	-3.00396	1.6411147236e-06	-3.64298	0.999804684080057	2.36389254589938	-0.640072	5.86784e-19
rs541970048	0.00055435289809	-0.805829	0.954639018068133	-1.2366	0.00028549509156	-2.18173	0.96713239118653	0.594125158371111	-0.642474	5.85376e-19
rs4810893	3.0898256841e-06	-1.47944	0.999735225645691	-3.02423	1.6422166201e-06	-3.64746	0.999804552964382	2.38056154539376	-0.643669	5.84677e-19
rs6066906	3.0874706944e-06	-1.49849	0.999735427396848	-2.99626	1.6408329025e-06	-3.6375	0.999804717614214	2.34389165858294	-0.652364	5.79615e-19
rs556570552	0.000562781	2.20346077646166	0.953981130434433	0.776551503196058	0.000297562	0.714057971014493	0.965790657030539	-1.44141	-0.664859	5.72418e-19
rs34796325	1.42515310144e-05	-2.31302	0.998779920110413	-0.682657	7.5965281924e-06	-2.65523	0.999096545790063	0.0173036960197477	-0.665354	5.72135e-19
rs3859593	1.44633414249e-05	0.435669077876558	0.998761809379586	-3.25227	7.5247073344e-06	3.48967963486833	0.999105079792218	2.5740948702474	-0.678171	5.64848e-19
rs35002974	1.42706395225e-05	-2.33419	0.998778286221148	-0.632853	7.6069501249e-06	-2.62894	0.999095307432197	-0.0514122	-0.684265	5.61417e-19
rs185799005	0.00029164783729	0.741774360716021	0.97561108772217	-1.58841	0.00014596264225	-2.43506	0.982921717936533	0.879156258708722	-0.709252	5.47562e-19
rs237482	3.1979453584e-06	2.73529872279509	0.999725963158115	-0.36122	1.7048263761e-06	2.78592161998637	0.999797103028586	-0.371514	-0.732733	5.34854e-19
rs79162719	0.00013179728809	0.0250930724806843	0.988829189206699	-2.24691	6.88616169241e-05	-2.80731	0.991869536536815	1.5023972221096	-0.744517	5.28589e-19
rs569408814	0.00062580525921	-1.10425	0.949089949595563	-0.910199	0.00031871889729	-1.94024	0.963447312110527	0.158971582409844	-0.751228	5.25053e-19
rs6019510	3.0888414001e-06	-1.39533	0.999735309968952	-3.14526	1.6416015625e-06	-3.65001	0.999804626150645	2.38967209831236	-0.755585	5.22771e-19
rs3092378	3.5979261124e-06	-1.06892	0.999691698760939	-3.4711	1.9202199184e-06	-3.7139	0.999771474195754	2.70300509940603	-0.768092	5.16273e-19
rs149743166	5.76185746761e-05	2.1897350570238	0.995085494219835	-0.272095	3.03718925449e-05	2.14417526904939	0.996397632001157	-0.522619	-0.794714	5.0271e-19
rs3091764	3.5995196176e-06	-1.08815	0.99969156225783	-3.45014	1.9211346025e-06	-3.69878	0.999771365363882	2.64721939744945	-0.802919	4.98603e-19
rs4810865	4.62637081e-06	1.70446324794272	0.999603607710632	-2.46453	2.4430002601e-06	3.38420739470637	0.999709276077481	1.65319680455619	-0.811335	4.94424e-19
rs190690389	0.00029144976961	0.795441632155765	0.975627247344509	-1.54849	0.00014575491441	-2.37458	0.982945608514561	0.735566016107631	-0.812926	4.93638e-19
rs62210399	6.5964217225e-06	3.12809001888372	0.999434907073562	1.15044869651994	3.5016888384e-06	1.94176178872216	0.999583341643669	-2.00719	-0.856739	4.72477e-19
rs562214521	0.00077320144225	1.22276446154676	0.937844383114863	-0.687947	0.00040104468121	1.69131283674804	0.95443587340217	-0.179217	-0.867163	4.67577e-19
rs34437921	1.42159915681e-05	-2.26545	0.998782958955264	-0.792667	7.57955961e-06	-2.62027	0.999098562042418	-0.0759519	-0.868619	4.66897e-19
rs34786572	1.43035996401e-05	-2.10539	0.998775467950775	-1.13898	7.6386457161e-06	-2.74446	0.999091541308392	0.260732468555213	-0.87825	4.62422e-19
rs6012515	4.7929907041e-06	0.947549205450169	0.999589337406539	-3.45013	2.5290222841e-06	3.63756924837608	0.999699042294825	2.55969348699685	-0.890435	4.56821e-19
rs554192423	0.00032419442916	0.407192286758417	0.972962980864816	-1.72461	0.00016302948489	-2.38233	0.980962836258113	0.803043569451795	-0.921569	4.42818e-19
rs78313389	9.68553190801e-05	0.811576678782016	0.991766399127411	-2.07315	5.22249038224e-05	2.72291010533191	0.993821690581676	1.14086068725227	-0.932288	4.38097e-19
rs62210404	6.9474943561e-06	3.19397073385411	0.999404849778987	1.38434047103352	3.69100944e-06	1.75765667291276	0.999560824689339	-2.32131	-0.936965	4.36053e-19
rs6012553	3.0984096529e-06	-2.72523	0.999734490260729	-0.404479	1.6487844025e-06	-2.73346	0.999803771458644	-0.532945	-0.937424	4.35853e-19
rs13045350	1.42822770561e-05	-2.17602	0.998777291146542	-0.988708	7.6246672384e-06	-2.66392	0.999093202251277	0.0422323763701726	-0.946476	4.31925e-19
rs3787321	1.43276633361e-05	-2.155	0.998773410383163	-1.0326	7.6565657025e-06	-2.67681	0.999089412037834	0.0786959951134532	-0.953901	4.2873e-19
rs238196	4.6873549009e-06	-2.95479	0.999598384628458	0.453632279073906	2.4953573089e-06	-2.30294	0.999703047291182	-1.40998	-0.956351	4.27681e-19
rs71351972	1.43412175204e-05	-2.16106	0.998772251435643	-1.01907	7.6560123025e-06	-2.66889	0.999089477793235	0.0575026080438792	-0.961567	4.25456e-19
rs237480	3.51412516e-06	-1.15051	0.999698877384642	-3.39236	1.8708494841e-06	-3.64301	0.999777348474032	2.42932508055504	-0.963032	4.24833e-19
rs6019384	4.7692008225e-06	1.06245850218651	0.999591374886469	-3.33718	2.5153325604e-06	3.58577031236207	0.99970067090625	2.36996654644635	-0.967211	4.23061e-19
rs34652120	1.42188572241e-05	-2.22079	0.998782713923075	-0.892603	7.5849015649e-06	-2.61986	0.999097927296168	-0.0766587	-0.969262	4.22195e-19
rs34192871	1.43423536369e-05	-2.22105	0.998772154292377	-0.887753	7.6758918916e-06	-2.61112	0.99908711569105	-0.0935817	-0.981335	4.17128e-19
rs77778449	1.43344774881e-05	-2.13718	0.998772827740273	-1.07055	7.65573561e-06	-2.67374	0.999089510670048	0.0704132940663267	-1.00014	4.09358e-19
rs3787319	1.43376579801e-05	-2.16135	0.998772555793086	-1.01856	7.6629866041e-06	-2.65356	0.999088649102146	0.0171796259045252	-1.00138	4.08849e-19
rs3787317	1.43291017444e-05	-2.10708	0.998773287392254	-1.13454	7.6512538881e-06	-2.6971	0.999090043191943	0.1327967758222	-1.00175	4.087e-19
rs736659	4.7729577841e-06	1.0840386138206	0.999591053121648	-3.31363	2.5190451225e-06	3.56929716787953	0.999700229237129	2.3117853646212	-1.00185	4.08659e-19
rs34600613	1.42129e-05	-2.22262	0.99878322330454	-0.888753	7.5822578881e-06	-2.60512	0.999098241425252	-0.115328	-1.00408	4.07747e-19
rs6012517	4.7717344249e-06	1.09141515177873	0.999591157896173	-3.30574	2.51761689e-06	3.56580323942774	0.999700399148367	2.29904193394305	-1.0067	4.06681e-19
rs6019383	4.7731325625e-06	1.08159285959492	0.999591038152764	-3.31626	2.5190768656e-06	3.56841780286802	0.999700225460777	2.30865425164645	-1.00761	4.06312e-19
rs6125504	6.7121928241e-06	3.00161726732001	0.999424995061307	0.771696832864184	3.5588067904e-06	2.05051736567576	0.999576548180427	-1.78211	-1.01042	4.05171e-19
rs6095356	6.7452920089e-06	2.35528286558061	0.999422161233721	-0.956032	3.5964088164e-06	2.7657902785248	0.999572075941954	-0.0551212	-1.01115	4.04874e-19
rs35854893	1.43373550609e-05	-2.16126	0.998772581694112	-1.01876	7.6628205124e-06	-2.64904	0.999088668837255	0.00521675551145373	-1.01355	4.03906e-19
rs79895253	3.29616070884e-05	0.949949662266905	0.9971826549623	-2.48605	1.75258612321e-05	3.02133819352712	0.997918109864766	1.46750044941829	-1.01855	4.0189e-19
rs6125535	6.5841507216e-06	3.09037942914153	0.999435957695382	1.03233842997619	3.4963016256e-06	1.91469858383605	0.999583982389757	-2.06012	-1.02778	3.98197e-19
rs6125572	6.8928826849e-06	3.17231843926519	0.999409525271304	1.31153912820062	3.6620563225e-06	1.74759229744206	0.999564268179266	-2.34287	-1.03133	3.96787e-19
rs186663857	0.00029660417284	-0.336822	0.9752068925383	-1.79328	0.00015252003001	2.37110421946736	0.982168155606378	0.747556385000091	-1.04572	3.91117e-19
rs62210395	6.5913887169e-06	3.08261762036637	0.999435337990508	1.00894122790714	3.5001171396e-06	1.91689383492084	0.999583528578813	-2.05537	-1.04643	3.9084e-19
rs56395482	6.5209751044e-06	3.08626968773741	0.999441366717144	1.01486112299067	3.4622417041e-06	1.91618253247416	0.999588033438921	-2.06216	-1.0473	3.90499e-19
rs62209202	6.67541289024e-05	0.770093460231668	0.994310721426963	-2.28975	3.57763085689e-05	2.82490683510189	0.995759340028024	1.24161068705114	-1.04814	3.90172e-19
rs4810892	6.7296661056e-06	2.27785101921239	0.999423499062729	-1.13646	3.5870466025e-06	2.81742918239658	0.999573189443458	0.0876744552768014	-1.04879	3.8992e-19
rs8115305	2.48050814209e-05	-2.61339	0.997878342885184	0.329873978142528	1.34454955761e-05	-1.91622	0.998402040350735	-1.3865	-1.05662	3.86877e-19
rs6125545	6.5851771456e-06	3.08677167440845	0.999435869814655	1.02127936979864	3.4967130025e-06	1.90167116767828	0.999583933461247	-2.08491	-1.06363	3.84175e-19
rs4810829	5.78717740225e-05	-2.54556	0.995064004490974	0.568356452478569	3.18240400384e-05	-1.51908	0.996226044818941	-1.64036	-1.07201	3.80971e-19
rs6012545	3.91830929296e-05	2.69620936667284	0.996652662603517	0.772810636539797	2.05395678436e-05	1.52081172800007	0.997560986006161	-1.85447	-1.08166	3.77312e-19
rs3795089	5.0664607744e-06	2.12404037531988	0.999565916710365	-1.61634	2.6901248256e-06	3.01863842551946	0.999679876971407	0.531227877158394	-1.08511	3.76009e-19
rs6066905	6.7416045316e-06	2.33046147446909	0.999422476940849	-1.01442	3.5930718916e-06	2.75954081686485	0.999572472821171	-0.0728414	-1.08727	3.75201e-19
rs6066907	6.7419680409e-06	2.33341035921018	0.999422445818621	-1.00752	3.5931098025e-06	2.75405555115929	0.999572468312213	-0.0879515	-1.09548	3.72133e-19
rs56308621	6.7110011136e-06	2.98368306466556	0.999425097091373	0.717968624532941	3.5580522384e-06	2.03495239306996	0.999576637924312	-1.814	-1.09603	3.71926e-19
rs113913941	4.79642123844e-05	-0.0873562	0.995905579651788	-2.74527	2.44140739236e-05	3.02756898317365	0.997102232891458	1.64789885468154	-1.09737	3.7143e-19
rs62212422	6.6631613161e-06	2.95885035117828	0.999429192983957	0.640669360594232	3.5338360225e-06	2.0706918105168	0.999579518128386	-1.74407	-1.1034	3.69195e-19
rs6125521	6.5284849081e-06	3.06864337459737	0.999440723733551	0.961219351859003	3.4653311716e-06	1.9114335442698	0.99958766597974	-2.0708	-1.10958	3.6692e-19
rs77571056	3.31028773201e-05	0.928666153356821	0.997170614260829	-2.50386	1.76023041601e-05	2.99546419863139	0.997909048226683	1.39195406921073	-1.1119	3.6607e-19
rs62212760	6.5379421636e-06	3.07334548327297	0.999439914011816	0.976370979142912	3.4721850244e-06	1.89977352982215	0.999586850788075	-2.09203	-1.11566	3.64699e-19
rs148947429	0.00033820681216	-2.19293	0.971827305102656	0.55203419689619	0.00018555343524	-0.711965	0.978389524263239	-1.66932	-1.11728	3.64106e-19
rs4810887	6.744409e-06	2.32829418559877	0.99942223683341	-1.01926	3.5946264025e-06	2.74927608850444	0.999572287934416	-0.100887	-1.12015	3.63064e-19
rs6019485	3.88800884521e-05	2.74130407239964	0.996678461723642	0.891230113534826	2.03115166489e-05	1.41327940037676	0.997588001104884	-2.01738	-1.12615	3.60892e-19
rs6125564	6.8907300004e-06	3.15041790157789	0.999409709570898	1.24218917706331	3.6615587904e-06	1.73117082653957	0.99956432735261	-2.37149	-1.1293	3.59758e-19
rs6125592	6.56230689e-06	3.05682554553617	0.999437827931834	0.927613396835469	3.4848675684e-06	1.91343918404954	0.999585342340136	-2.06416	-1.13655	3.57158e-19
rs17367758	6.6571740225e-06	2.94598763637773	0.999429705599516	0.602267909821649	3.5306034201e-06	2.06273050947584	0.999579902605674	-1.76098	-1.15871	3.49331e-19
rs6019391	4.6488534544e-06	1.70693653414467	0.999601682141441	-2.45789	2.4564606361e-06	3.27312401503213	0.99970767472302	1.28628281201393	-1.17161	3.44852e-19
rs3795085	6.6571224196e-06	2.94213492291116	0.999429710017616	0.590927899499532	3.5306034201e-06	2.06005886140959	0.999579902605674	-1.76648	-1.17555	3.43495e-19
rs735085	4.7697686404e-06	1.01245432650482	0.999591326255715	-3.38897	2.5159669924e-06	3.54128156955705	0.999700595430307	2.21160279808882	-1.17737	3.42872e-19
rs557650822	0.000529736	-2.04234	0.956565832099765	0.426736847866924	0.00028124967025	-0.469265	0.967605312081668	-1.60834	-1.18161	3.41423e-19
rs62212423	6.6571224196e-06	2.93950715852628	0.999429710017616	0.583204521784685	3.5306034201e-06	2.06020787763639	0.999579902605674	-1.76618	-1.18297	3.40957e-19
rs62210401	6.5408574001e-06	3.04795680173294	0.999439664412145	0.898930217568384	3.4735640625e-06	1.90372635814889	0.999586686766568	-2.08431	-1.18538	3.40135e-19
rs56228039	6.5302735936e-06	3.04979181667345	0.999440570587802	0.903716771441904	3.4681985361e-06	1.90140739189501	0.999587324937582	-2.0895	-1.18578	3.40001e-19
rs62212426	6.6550068729e-06	2.94326538048555	0.999429891145015	0.594094556468624	3.5295512641e-06	2.04642547279782	0.999580027746425	-1.79461	-1.20052	3.35027e-19
rs184592923	0.00061756723081	-0.649071	0.94972643159855	-1.29508	0.00031974088969	-1.90467	0.963334401114205	0.0944210994406196	-1.20066	3.34979e-19
rs6012514	4.7692881769e-06	1.03168686780807	0.999591367405003	-3.36938	2.5154911609e-06	3.5290694375264	0.999700652038155	2.16834950351763	-1.20103	3.34856e-19
rs3795084	6.6549552784e-06	2.95912734715395	0.999429895562397	0.640875792182104	3.5294009689e-06	2.02223381434738	0.999580045622155	-1.84383	-1.20295	3.34213e-19
rs7268357	4.7737006144e-06	1.04351268719564	0.999590989502002	-3.35665	2.5188229264e-06	3.5223366181919	0.999700255670927	2.14527784213113	-1.21137	3.3141e-19
rs6019382	4.7738317081e-06	1.04479818390689	0.999590978274493	-3.35529	2.5189181521e-06	3.52024119311201	0.999700244342299	2.1379202833385	-1.21737	3.29427e-19
rs11908499	3.04921526809e-05	-1.36143	0.997393177727293	-2.05048	1.66739922244e-05	-2.8112	0.998019102594495	0.83149417917138	-1.21899	3.28896e-19
rs237726	6.3863354944e-06	-2.00524	0.999452894596956	-1.74603	3.3983447716e-06	-2.9783	0.999595633357554	0.526736571577426	-1.2193	3.28794e-19
rs116934675	4.62983624041e-05	2.68405667600881	0.996047221285002	0.821173656766495	2.45211155344e-05	-1.32795	0.997089564833829	-2.04057	-1.2194	3.28761e-19
rs6125557	6.5375330596e-06	3.0204117550433	0.999439949038906	0.815147555926854	3.4708807809e-06	1.92883635797599	0.999587005913631	-2.0366	-1.22145	3.28085e-19
rs73130177	1.50647225689e-05	-1.02573	0.998710392200361	-2.80133	8.0048819041e-06	3.18194670747785	0.999048026563892	1.57908644809833	-1.22224	3.27826e-19
rs6125511	6.6554712324e-06	2.95634191532743	0.999429851387802	0.632680468853697	3.5297391376e-06	2.01643637292682	0.999580005401228	-1.85548	-1.2228	3.27644e-19
rs237727	6.35796225e-06	-1.97784	0.999455323955739	-1.8028	3.3834659364e-06	-2.99401	0.999597403066872	0.571453100676428	-1.23135	3.24855e-19
rs6125550	6.5337494544e-06	3.0471730591678	0.999440272987656	0.896002534293461	3.4686455049e-06	1.87927063030557	0.999587271775473	-2.13126	-1.23526	3.23588e-19
rs6125512	6.6558324121e-06	2.95622293973774	0.999429820464569	0.632355926658903	3.52988944e-06	2.00967638918459	0.999579987524643	-1.86906	-1.23671	3.2312e-19
rs62210372	6.5303247025e-06	3.05547359564852	0.999440566211902	0.921055343408749	3.4674908944e-06	1.8638809528924	0.999587409103927	-2.16022	-1.23916	3.22327e-19
rs4810884	6.7730583001e-06	2.28296144875524	0.999419784000802	-1.12161	3.6101520016e-06	2.7399896844277	0.999570441391037	-0.124217	-1.24583	3.20186e-19
rs16994118	4.81203041344e-05	-0.0467611	0.99589230975827	-2.74636	2.44890378496e-05	2.97726243978144	0.997093361099047	1.49878451978242	-1.24757	3.19627e-19
rs191887227	0.00054913360896	1.99800713505394	0.955046897850614	0.35522137966592	0.00029119374736	0.441118351656079	0.9664983127415	-1.60405	-1.24883	3.19227e-19
rs6012521	4.6449732484e-06	1.66735182487171	0.999602014468595	-2.52507	2.4530137641e-06	3.26885283582661	0.999708084790114	1.27161622843636	-1.25345	3.17753e-19
rs182383415	0.00067004357904	-0.248826	0.945686571770323	-1.42722	0.00036534881881	-1.91589	0.958322383494453	0.169928809887637	-1.25729	3.16537e-19
rs56377561	6.5306313601e-06	3.05818016755951	0.999440539956141	0.929347579737363	3.4667460864e-06	1.84504167740827	0.999587497690818	-2.19525	-1.2659	3.13823e-19
rs6125544	6.5301713764e-06	3.04422	0.999440579339552	0.886740328642316	3.4665598969e-06	1.86434068973666	0.999587519836057	-2.15949	-1.27275	3.11679e-19
rs112470682	4.80793852449e-05	-0.0766855	0.995895788378813	-2.74494	2.44644987456e-05	2.96749397512414	0.997096265223008	1.46934631401006	-1.2756	3.10794e-19
rs3795091	6.6954150025e-06	2.46052443431045	0.999426431521363	-0.706463	3.5699835136e-06	2.57373084088407	0.999575218860335	-0.57133	-1.27779	3.10113e-19
rs375498747	0.000102738	2.6914956590371	0.99127064026519	1.21992442421291	5.59538408529e-05	-0.138432	0.993383468776196	-2.49957	-1.27965	3.09537e-19
rs237725	6.3684055449e-06	-1.96216	0.999454429784146	-1.83286	3.3895387449e-06	-2.98751	0.99959668075784	0.552925123990355	-1.27994	3.09449e-19
rs62210371	6.5293025625e-06	3.05086390764113	0.999440653726663	0.906911245488249	3.4660385929e-06	1.84807141744506	0.999587581839566	-2.18976	-1.28285	3.0855e-19
rs117302510	6.40195214884e-05	0.139190023521413	0.994542512873348	-2.59575	3.47597501476e-05	2.8548579143585	0.995879338851495	1.3124438933134	-1.28331	3.08408e-19
rs6012519	4.8165764089e-06	0.962167432917022	0.999587317421491	-3.43372	2.5429405156e-06	3.52063762808373	0.999697386504186	2.14404214470493	-1.28968	3.06447e-19
rs479180	3.60882540225e-05	-0.897266	0.996916233522792	-2.4895	1.86194839009e-05	-2.92077	0.997788486159769	1.19896972566926	-1.29053	3.06187e-19
rs77044851	4.81012989601e-05	-0.0755094	0.99589392543423	-2.7448	2.44748867841e-05	2.96090119481486	0.997095035830028	1.45006701407861	-1.29474	3.04902e-19
rs6125563	6.5362546921e-06	3.02409440626455	0.999440058491516	0.826174000889921	3.4695022756e-06	1.88444482621627	0.999587169871872	-2.1214	-1.29523	3.04752e-19
rs77360770	4.80908962576e-05	-0.0762424	0.995894809795419	-2.74486	2.447083024e-05	2.95967089835853	0.997095515909409	1.44635502958539	-1.2985	3.03756e-19
rs62210369	6.5312958096e-06	3.03475841667841	0.999440483066548	0.858084433171403	3.4669322809e-06	1.85710296084255	0.999587475544986	-2.1729	-1.31482	2.9884e-19
rs186504102	0.00010611472144	1.31992389236205	0.990986358959366	-1.49126	5.830391449e-05	2.31639535340571	0.993107488407612	0.175692318630592	-1.31557	2.98616e-19
rs113540052	4.80687075856e-05	-0.0853781	0.995896696118222	-2.74435	2.44601463184e-05	2.95309884101809	0.997096780320521	1.42676973205293	-1.31758	2.98016e-19
rs4810954	3.1894030921e-06	-1.86751	0.999726694957955	-2.35914	1.6973920656e-06	-3.25326	0.999797987631494	1.03719732301896	-1.32194	2.9672e-19
rs112096622	4.80699555625e-05	-0.0869272	0.995896590023928	-2.74421	2.44602452329e-05	2.95058565671802	0.997096768614263	1.41937471118145	-1.32483	2.95863e-19
rs112969025	4.78989952281e-05	-0.14594	0.995911124090038	-2.73914	2.438680689e-05	2.94854504586599	0.997105459915574	1.41191197381193	-1.32722	2.95156e-19
rs61123208	4.80759183424e-05	-0.0855376	0.995896083110271	-2.74426	2.44630149201e-05	2.94977163410507	0.997096440829521	1.41703519366627	-1.32723	2.95155e-19
rs6019381	4.7712975489e-06	1.00210590890571	0.999591195312398	-3.39923	2.5164745956e-06	3.50047278641401	0.999700535042708	2.0680635701319	-1.33117	2.93994e-19
rs141582256	4.81148935201e-05	-0.0522868	0.99589276972718	-2.74614	2.44919081449e-05	2.94835449278935	0.997093021409944	1.41344171304278	-1.3327	2.93544e-19
rs6095584	3.51130908969e-05	-1.43469	0.996999311849585	-1.87838	1.874197264e-05	2.6846761526379	0.997773970046224	0.541953197410213	-1.33643	2.92451e-19
rs56145535	6.5744036836e-06	3.05343478701746	0.999436792221449	0.918175504626312	3.4895734416e-06	1.81067321898889	0.999584782629873	-2.25477	-1.33659	2.92404e-19
rs6095404	3.0908804481e-06	1.48025413943541	0.999735135284449	-3.02286	1.6426010896e-06	3.44741112949034	0.999804507216012	1.67116652196255	-1.35169	2.88021e-19
rs8115327	3.1081337401e-06	-1.99032	0.999733657203616	-2.13521	1.6503513156e-06	-3.17718	0.999803585010568	0.778614346650787	-1.35659	2.86613e-19
rs6125582	5.9624849124e-06	3.15915587553546	0.999489186534748	1.19783085935013	3.1682220025e-06	1.66503553470603	0.999623005180273	-2.55599	-1.35816	2.86165e-19
rs59338851	4.80999118681e-05	-0.078166	0.99589404335449	-2.74462	2.44710281124e-05	2.93869597034054	0.997095492491815	1.38467971770893	-1.35994	2.85657e-19
rs117257533	3.49874616004e-05	1.86176885285257	0.997010015754722	-1.17833	1.88823273444e-05	2.39583189502414	0.99775733716032	-0.186477	-1.36481	2.84268e-19
rs533121487	0.00069601520041	1.77835729528734	0.943699849706025	0.0537221460822475	0.00039284825616	0.518788722730116	0.955325496662616	-1.42562	-1.3719	2.82261e-19
rs6012527	6.59350496016e-05	-0.55065	0.99438013708705	-2.43997	3.25108653489e-05	2.77859915150048	0.996144909445921	1.06624439965921	-1.37372	2.81745e-19
rs184489942	0.00011152416025	1.24434	0.990531218963899	-1.56302	6.12758618521e-05	2.31030328734819	0.992758697941716	0.185448287040238	-1.37758	2.80663e-19
rs569860313	0.00059001867409	-1.58814	0.951861087571338	-0.316445	0.00031967652025	1.10092564109735	0.963341511949346	-1.06925	-1.3857	2.78392e-19
rs140884947	0.00012111	-2.31996	0.989725708363012	0.374411137368702	6.26128786089e-05	1.18100856457171	0.992601864319795	-1.76103	-1.38662	2.78135e-19
rs57008803	4.78498693696e-05	-0.189893	0.995915300566951	-2.7323	2.43044070025e-05	2.92581060659844	0.997115211980625	1.3436845004719	-1.38861	2.77582e-19
rs62210458	5.9659528009e-06	3.14681498282519	0.999488889588296	1.15922918619976	3.1699309849e-06	1.65948675320007	0.999622801900803	-2.56494	-1.40571	2.72876e-19
rs4141783	6.5394764176e-06	3.00222505513757	0.999439782650488	0.760560059141387	3.4724459025e-06	1.85876197375835	0.999586819759472	-2.16903	-1.40847	2.72124e-19
rs6122760	5.9660505025e-06	3.14406255757303	0.99948888122236	1.15058416874457	3.1700022025e-06	1.66203487882277	0.999622793429637	-2.5607	-1.41012	2.71677e-19
rs150937122	0.00059295172036	-1.87164	0.951633358178389	0.15232646525594	0.00032029545024	0.423478498949533	0.963273143648167	-1.56575	-1.41342	2.70779e-19
rs56186873	4.79823592249e-05	-0.214254	0.995904036908647	-2.72602	2.43866093584e-05	2.91095280138024	0.997105483293303	1.30209098937571	-1.42393	2.6795e-19
rs3795077	6.5393741284e-06	2.99922181118558	0.999439791408388	0.751545426073373	3.4724086336e-06	1.85136092388271	0.999586824192201	-2.18276	-1.43121	2.66005e-19
rs147427028	4.01517391716e-05	0.837581708629631	0.996570196805055	-2.48806	2.12473980601e-05	2.84543409357651	0.997477145277849	1.04685235370792	-1.44121	2.6336e-19
rs6125554	3.16804401e-06	1.45405359851677	0.999728524754915	-3.04897	1.68272784e-06	3.42114554424915	0.999799732521047	1.59301808338313	-1.45595	2.59505e-19
rs80070811	9.54273043161e-05	0.749307225431455	0.991886808736501	-2.12868	5.16361527889e-05	2.54386758384209	0.993890915493184	0.66687522185984	-1.4618	2.57991e-19
rs73264237	0.00040332287241	0.858123079834088	0.966584376681101	-1.34348	0.00018108277489	1.91381245030357	0.978899212938693	-0.136526	-1.48001	2.53337e-19
rs73258445	4.7720464e-05	-0.22423	0.995926302242886	-2.72656	2.41884945124e-05	2.8909474643059	0.99712893060071	1.24025567574321	-1.48631	2.51746e-19
rs546088491	0.00049587718489	1.51950530574853	0.959228819219541	-0.49251	0.00026945550801	1.23605095308588	0.968921559388463	-0.995451	-1.48796	2.5133e-19
rs6122758	5.96727184e-06	3.12145488783363	0.999488776642387	1.07989777884558	3.1702870809e-06	1.65540597462553	0.999622759544024	-2.57165	-1.49175	2.5038e-19
rs4810895	6.7555287396e-06	2.34327893072324	0.999421284806633	-0.983461	3.6032012041e-06	2.59065119243919	0.999571268086092	-0.523041	-1.5065	2.46713e-19
rs238159	5.61500416e-06	-2.39786	0.999518941320373	-0.946276	2.9871245889e-06	-2.61072	0.999644546763835	-0.564349	-1.51063	2.45698e-19
rs6012488	6.9916349889e-06	0.663705434975815	0.999401070780118	-3.49006	3.6854784576e-06	3.41715110222111	0.999561482505517	1.96984513511654	-1.52022	2.43352e-19
rs187383330	0.00062192379456	-0.463478	0.949389730857527	-1.38983	0.00032050666729	-1.77722	0.963249814391919	-0.130592	-1.52042	2.43303e-19
rs192886238	4.06345052304e-05	2.80988999956075	0.996529101561933	1.10236779574198	2.15823426624e-05	-0.848972	0.997437476834934	-2.62393	-1.52156	2.43026e-19
rs6019387	4.8203519809e-06	0.941376341931105	0.999586994065409	-3.45311	2.5451416225e-06	3.45754850032908	0.999697124648704	1.92441582344332	-1.5287	2.41298e-19
rs8114658	3.52784917849e-05	-1.47708	0.996985219663826	-1.81452	1.89185852025e-05	2.58339368440413	0.997753040473798	0.280374797802598	-1.53414	2.39987e-19
rs8118325	5.6170896016e-06	2.39795108943309	0.999518762738672	-0.945874	2.9880925321e-06	2.59968413927954	0.999644431624277	-0.592919	-1.53879	2.38874e-19
rs147686328	0.00028824908841	0.006583440826015	0.975888453533744	-1.86251	0.00014983963281	2.18289504856669	0.982476042008071	0.318671143701085	-1.54384	2.37671e-19
rs139804345	4.54650821284e-05	-1.58745	0.996118087428641	-1.52061	2.48273989441e-05	-2.4013	0.997053318877541	-0.0389038	-1.55952	2.33974e-19
rs6095363	6.7453439524e-06	2.34366890242494	0.999422156786527	-0.983299	3.5972812225e-06	2.5690243323755	0.999571972181847	-0.579631	-1.56293	2.33177e-19
rs1875721	4.3200375409e-06	1.74070349824631	0.999629844950057	-2.43633	2.30098561e-06	3.15304	0.999726171593719	0.867972545885008	-1.56836	2.31915e-19
rs569220641	0.000719795	-0.807652	0.941888081130523	-1.11549	0.00040142126025	-1.50953	0.95439504009022	-0.456488	-1.57198	2.31076e-19
rs73611304	6.7491363681e-06	2.30582660677237	0.999421832095202	-1.07094	3.6002785536e-06	2.59694641200776	0.99957161569276	-0.507124	-1.57807	2.29674e-19
rs146226471	0.00014975640625	1.11751583248212	0.98732631046972	-1.56761	8.17183456324e-05	2.15337252290422	0.990366171783339	-0.0250668	-1.59267	2.26344e-19
rs113140217	5.32993444096e-05	0.190173738192816	0.99545222226001	-2.67856	2.84340631696e-05	2.80881260830102	0.996626699922139	1.08547554868857	-1.59308	2.26251e-19
rs139923640	9.81306190881e-05	0.576869380350875	0.991658891071915	-2.22828	5.27353368481e-05	2.5252171949253	0.993761682047451	0.629948585564824	-1.59833	2.25067e-19
rs6095364	6.7460192361e-06	2.33928179539601	0.999422098971447	-0.993516	3.5976226276e-06	2.55814713666607	0.999571931576646	-0.607456	-1.60097	2.24473e-19
rs4809733	6.7635364624e-06	2.2903817463125	0.999420599219172	-1.10535	3.6088980841e-06	2.60067589263625	0.999570590525966	-0.496244	-1.6016	2.24333e-19
rs6019758	4.3242786601e-06	1.74112402560243	0.999629481691634	-2.43511	2.3030490564e-06	3.14147524347975	0.999725926100928	0.832024561659921	-1.60308	2.23999e-19
rs4810897	6.7502794969e-06	2.35509770488775	0.99942173422517	-0.9561	3.6003544516e-06	2.5422354094421	0.999571606665796	-0.647638	-1.60374	2.23853e-19
rs73909765	0.00040404216064	0.811306017670939	0.966526777864628	-1.38041	0.00018372447025	1.85528791176362	0.978597975767716	-0.237922	-1.61833	2.20609e-19
rs2003712	1.13493524544e-05	-1.64195	0.999028135437472	-2.12146	6.0597207225e-06	-2.87176	0.999279186378028	0.50297947958123	-1.61848	2.20577e-19
rs3795090	6.7295104569e-06	2.33586982919129	0.999423512388782	-1.00271	3.5888271364e-06	2.55489806906599	0.999572977674214	-0.616979	-1.61969	2.20311e-19
rs6066904	6.7842537156e-06	2.26421490712799	0.999418825499674	-1.16338	3.6193160025e-06	2.61323030828668	0.999569351470103	-0.462093	-1.62548	2.19039e-19
rs41304423	0.00038833825969	0.600102505290186	0.967785870429185	-1.54341	0.00017660815236	1.9476876307433	0.979409885356982	-0.0837827	-1.6272	2.18663e-19
rs6095361	6.7382814724e-06	2.33363638464917	0.999422761448121	-1.00727	3.5941713889e-06	2.55231217988955	0.999572342051744	-0.622838	-1.63011	2.18027e-19
rs7270892	0.00040407834289	0.813926185347508	0.966523880661178	-1.37831	0.00018396310689	1.84698414102763	0.978570772741905	-0.252376	-1.63069	2.17901e-19
rs28437881	0.00040387735089	0.796792508222743	0.966539974814162	-1.39188	0.00018331806025	1.85342885630932	0.978644307347354	-0.2423	-1.63418	2.1714e-19
rs113244836	4.67108003209e-05	-0.0649246	0.99601214932051	-2.76015	2.36832115716e-05	2.85235506129612	0.997188736889293	1.11946788323805	-1.64068	2.15733e-19
rs139206491	0.00077886204561	0.115041152926928	0.937417819650021	-1.37943	0.000374926	1.65692816195837	0.957276556569616	-0.262445	-1.64188	2.15476e-19
rs58899629	0.00040531755625	0.775547001117596	0.966424664224619	-1.40634	0.00018406891584	1.84644583996698	0.97855871169331	-0.253088	-1.65943	2.11727e-19
rs149267689	3.81156829641e-05	0.320772167501648	0.996743552469592	-2.81228	2.03945269609e-05	2.88718188320272	0.99757816747783	1.14620024189124	-1.66608	2.10324e-19
rs189282829	0.00023118594304	1.56074397558666	0.980568939664725	-0.776147	0.00012264676516	1.5769960088852	0.985610524472484	-0.895064	-1.67121	2.09248e-19
rs61332152	0.00040383313936	0.850290610879994	0.966543515062441	-1.34935	0.00018176162761	1.8105830780528	0.978821784464223	-0.322999	-1.67235	2.09009e-19
rs115336149	3.95053732089e-05	2.68924622891718	0.996625223723462	0.758106249808181	2.071888324e-05	1.06179533371414	0.997539745210579	-2.44143	-1.68332	2.06729e-19
rs139128058	0.00035559022041	-1.79886	0.970422093760856	-0.190278	0.00019359661321	-0.90567	0.977473877073857	-1.49566	-1.68594	2.06188e-19
rs113779424	0.00041423239729	0.73753850840429	0.965711505895854	-1.42382	0.00018565697536	1.83794475105683	0.978377726204624	-0.264516	-1.68833	2.05695e-19
rs575071127	0.000206612	-1.90382	0.982598435589264	-0.24487	0.00011439585936	-1.20032	0.986565553217232	-1.44427	-1.68913	2.0553e-19
rs4809734	6.7604160064e-06	2.2652649149257	0.999420866379346	-1.16276	3.6070745929e-06	2.5831784460018	0.999570807403337	-0.541829	-1.70459	2.02378e-19
rs6019925	0.00045814405849	1.67426171376779	0.962214020597914	-0.289292	0.00022222759329	-0.911755	0.974228346751533	-1.4243	-1.7136	2.00564e-19
rs79213267	4.63362019849e-05	-0.181407	0.996044003465245	-2.74987	2.34937967616e-05	2.82403281177791	0.997211158249776	1.03539547325253	-1.71448	2.00387e-19
rs62210106	2.57369523856e-05	0.695448201909658	0.997798812460046	-2.81809	1.35887339641e-05	2.93894403316071	0.998385044359988	1.09749761745369	-1.72059	1.99166e-19
rs7353256	3.19372641e-06	-1.84003	0.999726324587332	-2.4094	1.69989444e-06	-3.14339	0.999797689875707	0.686591921893617	-1.72281	1.98725e-19
rs6066903	6.7953019684e-06	2.24568241278512	0.999417879599757	-1.20434	3.6260538084e-06	2.59060402684564	0.999568550110316	-0.520013	-1.72435	1.98418e-19
rs60071644	0.00041892264976	0.683783149954074	0.965336723314148	-1.45536	0.00018981675076	1.82231770871137	0.977903968612863	-0.282446	-1.73781	1.95766e-19
rs61362607	4.7941292025e-06	0.990966180265351	0.999589239900266	-3.40795	2.5298493025e-06	3.3836911760083	0.999698943907939	1.6688525575024	-1.73909	1.95515e-19
rs569671380	0.00018740241025	-1.70251	0.984190745417735	-0.647223	9.61717571584e-05	-1.52323	0.988681535601829	-1.09367	-1.7409	1.95162e-19
rs532357852	0.00057570723721	-0.924514	0.952973830213014	-1.12126	0.00029876085409	-1.48449	0.96565761928757	-0.62167	-1.74293	1.94766e-19
rs550347967	0.00013606056025	2.25958249389172	0.988472010421127	0.291938557818765	7.23874252864e-05	-0.830628	0.991456802213496	-2.03929	-1.74735	1.93907e-19
rs7272109	0.00041927067121	0.67506995961145	0.965308925662645	-1.46068	0.00018985532944	1.81747321972886	0.977899577027132	-0.290976	-1.75166	1.93073e-19
rs4809735	6.5531392081e-06	2.2962916665039	0.999438612857241	-1.10755	3.4866225625e-06	2.54823403400723	0.999585133603412	-0.648376	-1.75593	1.92251e-19
rs106491	5.6016949041e-06	-2.31622	0.99952008102752	-1.13979	2.9798009641e-06	-2.5893	0.999645417930406	-0.621245	-1.76104	1.91271e-19
rs238170	5.6050089001e-06	-2.31883	0.999519797240944	-1.13345	2.9815964929e-06	-2.58644	0.999645204346868	-0.62834	-1.76179	1.91126e-19
rs6122768	5.6009848896e-06	-2.31726	0.999520141828032	-1.13746	2.9792831236e-06	-2.58628	0.999645479529105	-0.629127	-1.76659	1.90212e-19
rs61734270	0.00052200825625	-0.418036	0.957172329638508	-1.49165	0.00027719919049	1.72570017958713	0.96805694870479	-0.280444	-1.77209	1.89168e-19
rs6012518	4.7894447104e-06	0.974064190671151	0.999589641101975	-3.42503	2.52619236e-06	3.37853907134768	0.99969937895909	1.65071736156885	-1.77432	1.88748e-19
rs575253	0.00016466	-2.30555	0.986082573713039	0.483481053039565	9.04073885584e-05	-0.0538744	0.989352721548412	-2.26979	-1.78631	1.86498e-19
rs191182994	0.00043931321604	1.41754692315766	0.96371075617148	-0.689858	0.00022838765625	1.1954540942928	0.973532874080674	-1.12028	-1.81014	1.82106e-19
rs191093308	0.00010792716544	1.03027298629293	0.990833816748099	-1.82025	5.931464256e-05	2.23618468889581	0.992988840936408	0.00260513033650467	-1.81765	1.80744e-19
rs138555598	5.97269300224e-05	2.05914092584158	0.994906580579508	-0.53067	3.09285025956e-05	1.74282277292883	0.996331855422282	-1.29089	-1.82156	1.80038e-19
rs190303928	0.000376438	-0.404414	0.968742217072508	-1.65352	0.00020180475364	-1.86822	0.976541215572968	-0.172065	-1.82559	1.79314e-19
rs6066902	6.7960840249e-06	2.23421802656765	0.999417812643792	-1.22995	3.62635849e-06	2.55797930998267	0.999568513873093	-0.60392	-1.83387	1.77836e-19
rs60126792	0.000408848	0.894970326409496	0.966142082255333	-1.30586	0.00018978644169	1.66882	0.977907418859131	-0.544548	-1.85041	1.74918e-19
rs4809718	4.7966256144e-06	0.901384399028364	0.999589026096062	-3.49241	2.5314082816e-06	3.37543367860016	0.999698758442832	1.64126110378719	-1.85115	1.74789e-19
rs553957475	4.05281204689e-05	-1.07279	0.996538157225649	-2.25953	2.21554724416e-05	-2.60196	0.997369606761247	0.405870888571506	-1.85366	1.74351e-19
rs112849061	4.51172829636e-05	0.794041632052691	0.996147668917446	-2.4655	2.39537809476e-05	2.66446817292093	0.997156710870395	0.608205635774295	-1.8573	1.73718e-19
rs79083100	0.00040423917249	0.975529327504141	0.966511002842165	-1.23838	0.00018773384256	1.61869416710457	0.978141134048624	-0.630126	-1.8685	1.71782e-19
rs140516519	0.00014884244001	1.47316005606511	0.987402683867389	-1.1157	7.93166578801e-05	1.7841250663879	0.990646660021912	-0.759346	-1.87505	1.70661e-19
rs4340590	4.64941241956e-05	-0.0667329	0.996030574227765	-2.76235	2.35827755641e-05	2.76717851987455	0.997200625548604	0.878741039193563	-1.88361	1.69207e-19
rs10854180	3.1297855744e-06	-1.84125	0.999731802308064	-2.41725	1.6618045921e-06	-3.0969	0.999802222179369	0.530251814056597	-1.887	1.68634e-19
rs142994553	6.07470595216e-05	2.04614	0.994820036158407	-0.548977	3.15841752004e-05	1.7086982515952	0.996254383410404	-1.33923	-1.8882	1.68431e-19
rs544420577	0.00027937116736	2.00003589719045	0.976613709347054	0.0754948857803155	0.00015599760201	0.258528891344206	0.981768988428281	-1.96951	-1.89401	1.67455e-19
rs45549039	0.00027927757456	1.96267263457718	0.97662136087942	0.00304743011251607	0.00015326687601	0.473705382024378	0.982082402793989	-1.9008	-1.89775	1.6683e-19
rs6125627	4.3246529764e-06	1.66149895652007	0.999629449630876	-2.57048	2.3035650625e-06	3.08829517377697	0.999725864710558	0.666531840157893	-1.90395	1.65799e-19
rs237707	5.6036831841e-06	-2.28997	0.999519910765626	-1.20006	2.9795592996e-06	-2.55467	0.999645446677131	-0.710311	-1.91037	1.64739e-19
rs571032710	0.00056093659281	0.765120903897552	0.954125008635291	-1.26164	0.000297183	-1.46569	0.965832782209981	-0.650823	-1.91246	1.64394e-19
rs6066861	3.6363438864e-06	2.39734231116145	0.999688407821553	-1.16418	1.9349922816e-06	2.62311651713826	0.999769716538341	-0.748522	-1.9127	1.64355e-19
rs6122730	6.4613572864e-06	2.91407676087367	0.999446471178035	0.493973076620569	3.4212051225e-06	1.72893250074338	0.999592914327887	-2.40925	-1.91528	1.63932e-19
rs558158460	0.000265657	1.89979753359102	0.977736136523371	-0.137958	0.00014869851364	0.701127585245445	0.982607176348504	-1.78433	-1.92229	1.62786e-19
rs11086276	6.39887616e-06	2.85638836179633	0.999451820850546	0.322786747651522	3.3963909849e-06	1.82117063588959	0.9995958657433	-2.24922	-1.92643	1.62113e-19
rs7346029	4.64476325625e-05	-0.190488	0.996034527701056	-2.74699	2.35456887121e-05	2.74396740575263	0.997205015609072	0.814191965583036	-1.9328	1.61084e-19
rs3091791	4.32806416e-06	1.66640069217458	0.999629157457932	-2.56194	2.30523489e-06	3.0757689521175	0.999725666047593	0.628297480509669	-1.93364	1.60949e-19
rs138730309	7.44517025316e-05	2.55767487894823	0.993658837583372	0.719762809183821	3.96406233664e-05	0.214657374112146	0.995303443874479	-2.65753	-1.93777	1.60286e-19
rs1007129	4.3280225521e-06	1.66372651281731	0.99962916102171	-2.56639	2.3051741584e-06	3.07382696208868	0.99972567327296	0.622314756680644	-1.94408	1.59278e-19
rs566678225	0.00057430684609	-0.280404	0.953082853161452	-1.49222	0.00030644253025	1.59101996515381	0.96480569194426	-0.452308	-1.94452	1.59207e-19
rs6122731	6.4674084721e-06	2.9161813684819	0.999445953074831	0.500570461729789	3.4256087056e-06	1.70649542910246	0.99959239056365	-2.44713	-1.94656	1.58883e-19
rs111970482	4.644831409e-05	-0.090806	0.996034469746299	-2.76095	2.355937444e-05	2.74370596233879	0.997203395591824	0.813760238843642	-1.94719	1.58783e-19
rs113067916	0.000414	0.997935813633459	0.96573005086688	-1.20587	0.00019210791609	1.53837218530623	0.977643223266387	-0.743473	-1.94934	1.58441e-19
rs142531207	0.00070126454596	0.458185745466629	0.943299310060841	-1.33597	0.00034565130889	1.44183157000167	0.96048060040939	-0.617121	-1.95309	1.57849e-19
rs111918050	4.64446339009e-05	-0.0659599	0.996034782697017	-2.76293	2.35522884249e-05	2.74179024823462	0.997204234382261	0.808373776273236	-1.95456	1.57618e-19
rs6067084	3.1924755625e-06	-1.76711	0.999726431745088	-2.54107	1.6991383201e-06	-3.10913	0.999797779845869	0.579285607848242	-1.96179	1.56482e-19
rs77888906	0.00042346643089	1.05902334012042	0.964973922082762	-1.13471	0.00019558581904	1.47357	0.97724768724656	-0.830539	-1.96525	1.55942e-19
rs56948172	0.00042232716036	1.04074333596099	0.965064862279144	-1.15448	0.00019539566656	1.48437589423682	0.977269304695303	-0.815376	-1.96985	1.55225e-19
rs73909764	0.000422755	1.03521229512183	0.965030731020071	-1.15955	0.00019584603025	1.48598377934188	0.977218106734109	-0.811974	-1.97152	1.54966e-19
rs2869727	5.6112608161e-06	-2.3011	0.999519261872651	-1.17383	2.9838762121e-06	-2.51669	0.999644933167561	-0.80587	-1.9797	1.53703e-19
rs6019742	5.6091764569e-06	-2.29968	0.999519440361842	-1.17728	2.9827362436e-06	-2.5168	0.99964506877015	-0.805768	-1.98305	1.5319e-19
rs568146042	0.000360051	-1.68267	0.970062185803098	-0.381007	0.00019672306564	-0.761789	0.977118419543144	-1.60519	-1.9862	1.52709e-19
rs75699534	5.6370155776e-06	2.30710458925804	0.99951705642957	-1.15772	3.0019720644e-06	2.50631413697175	0.999642780617897	-0.828897	-1.98662	1.52644e-19
rs237740	5.6021682721e-06	-2.33662	0.999520040491709	-1.09232	2.979076e-06	-2.48127	0.999645504167087	-0.895136	-1.98746	1.52516e-19
rs1503482	3.1107435129e-06	-1.94432	0.999733433626075	-2.22526	1.6518932676e-06	-3.00148	0.999803401532698	0.236376854651994	-1.98889	1.52298e-19
rs149668003	8.41468643856e-05	-0.403054	0.992838999411319	-2.38891	4.47784473889e-05	2.46295767723154	0.994697950368814	0.397167812685071	-1.99174	1.51864e-19
rs238205	5.5996123225e-06	-2.31222	0.999520259364783	-1.14924	2.9780750041e-06	-2.50231	0.999645623238613	-0.842894	-1.99213	1.51805e-19
rs117002454	5.69439270544e-05	1.64219492931467	0.995142757961247	-1.32179	3.04297863424e-05	2.07187037735302	0.996390790081602	-0.673556	-1.99535	1.51318e-19
rs113411521	0.00042294390336	1.02335453378457	0.965015629763937	-1.17112	0.00019572289801	1.47618673204623	0.97723210404298	-0.826445	-1.99756	1.50983e-19
rs11086277	6.4000398289e-06	2.84487890490665	0.999451721215975	0.290085954384498	3.39701761e-06	1.79937062557647	0.999595791211743	-2.28858	-1.99849	1.50843e-19
rs530617459	0.000724094	1.30134899104389	0.941561285437339	-0.622617	0.00037681409689	0.642488808296028	0.957070615792107	-1.37656	-1.99918	1.50739e-19
rs6125489	6.4543943025e-06	2.89469209423156	0.999447067350168	0.437167404674636	3.41843121e-06	1.71189355833198	0.999593244258621	-2.43896	-2.00179	1.50346e-19
rs237474	4.1271954025e-06	3.46870616032094	0.999646362456564	2.0402147145983	2.17090756e-06	0.416866431383195	0.99974164751095	-4.04373	-2.00351	1.50087e-19
rs73266267	0.00042068881449	0.850370782079598	0.965195670308537	-1.33003	0.00019510223041	1.57943570615483	0.977302665805289	-0.673756	-2.00378	1.50047e-19
rs113516223	0.00070245141444	0.641904179777994	0.943208795822939	-1.23987	0.00033279610329	1.34321125710558	0.961894369692851	-0.765964	-2.00583	1.4974e-19
rs142570891	0.00012828280644	2.27559110734403	0.989123828162111	0.300406846334107	6.70006094521e-05	0.469430289821255	0.992087526346648	-2.31035	-2.00994	1.49125e-19
rs237742	5.60079556e-06	-2.31748	0.999520158040853	-1.13697	2.9784201561e-06	-2.48885	0.999645582181723	-0.876431	-2.0134	1.48611e-19
rs2010097	5.6052456516e-06	-2.33511	0.99951977696727	-1.09558	2.9807331904e-06	-2.472	0.999645307039279	-0.917833	-2.01341	1.48609e-19
rs237739	5.60032225e-06	-2.31411	0.999520198571707	-1.14481	2.9782820929e-06	-2.48993	0.999645598604764	-0.873772	-2.01858	1.47842e-19
rs6019489	6.4568842816e-06	2.88620407392249	0.999446854157557	0.412838646788773	3.4198735041e-06	1.71444175872903	0.999593072711311	-2.43438	-2.02154	1.47405e-19
rs6019437	2.531599225e-05	1.79774619894664	0.99783473768666	-1.45516	1.32160604521e-05	2.30907000349344	0.998429265244958	-0.566391	-2.02155	1.47404e-19
rs6019494	6.4398705361e-06	2.88248761669077	0.999448310880364	0.400812581176441	3.4108179856e-06	1.72148643087652	0.999594149780991	-2.42361	-2.02279	1.47221e-19
rs56000282	0.000425267	1.13206769469499	0.964830239130587	-1.05553	0.00019689141124	1.37297424421671	0.977099287066096	-0.967349	-2.02288	1.47208e-19
rs6012548	6.4560203569e-06	2.88354382554007	0.999446928126987	0.405101851185635	3.4193557225e-06	1.71807046480816	0.999593134296553	-2.42823	-2.02313	1.47172e-19
rs6019745	5.6493208489e-06	-2.28023	0.999516002702593	-1.21826	3.00606244e-06	-2.51482	0.999642294058147	-0.806864	-2.02512	1.46879e-19
rs148445409	0.00031355909776	-0.32691	0.973826726722042	-1.76947	0.00016997640625	1.86299520613615	0.980167723231321	-0.259263	-2.02873	1.46349e-19
rs57695368	0.000422385	1.07374951342935	0.965060268551808	-1.12074	0.00019549352761	1.41397807164978	0.977258179260889	-0.914842	-2.03558	1.4535e-19
rs3091473	7.88838843556e-05	2.47598984874449	0.993283877360989	0.543054044611454	4.32671897284e-05	-0.331983	0.994875975869802	-2.58208	-2.03903	1.4485e-19
rs56708279	0.00042242169841	0.992040052741949	0.965057315299224	-1.20215	0.00019560260164	1.46768865563643	0.97724577936578	-0.838955	-2.0411	1.4455e-19
rs2057077	3.1102144164e-06	-1.90708	0.999733478953421	-2.29703	1.6516362256e-06	-3.00767	0.999803432118288	0.2549055689451	-2.04213	1.44402e-19
rs531223523	0.00059695194276	0.711631181290571	0.951322946029198	-1.27039	0.00031418626009	-1.35705	0.963948402704709	-0.773807	-2.0442	1.44103e-19
rs238195	5.6030203849e-06	-2.30744	0.999519967522941	-1.15996	2.9796628689e-06	-2.48379	0.999645434357248	-0.888801	-2.04876	1.43447e-19
rs237471	4.1260984384e-06	3.45075518884644	0.999646456416385	1.97799884493454	2.1703771684e-06	0.44008498391279	0.999741710614787	-4.0339	-2.0559	1.42426e-19
rs479474	5.60316241e-06	-2.30379	0.999519955360941	-1.16838	2.9796973924e-06	-2.48288	0.999645430250574	-0.891046	-2.05942	1.41926e-19
rs238212	5.5990444129e-06	-2.30655	0.999520307996475	-1.16237	2.9779024356e-06	-2.47983	0.999645643766167	-0.898906	-2.06128	1.41663e-19
rs117590849	3.79695045636e-05	-0.994425	0.996756000838308	-2.37264	2.07692567289e-05	-2.57752	0.997533778384421	0.311073161131522	-2.06156	1.41622e-19
rs144756219	3.79958822464e-05	-0.966942	0.996753754525029	-2.39916	2.07828397924e-05	-2.5826	0.997532169459471	0.324468643361551	-2.07469	1.39776e-19
rs80170815	4.04997323236e-05	2.42103162506246	0.996540573703848	0.087232277273789	2.12710974436e-05	1.28852616834993	0.997474338388655	-2.16257	-2.07534	1.39685e-19
rs6019496	6.4401243076e-06	2.87817900967002	0.999448289152328	0.388428805324481	3.4107071761e-06	1.69648745674975	0.999594162960764	-2.46633	-2.0779	1.39328e-19
rs113605591	0.00041251234816	0.951325429336694	0.965849022280536	-1.25143	0.00019121634961	1.48164968433841	0.977744671179715	-0.829372	-2.0808	1.38924e-19
rs6019500	6.43535424e-06	2.8739041311889	0.99944869756792	0.375772274243937	3.4080113664e-06	1.70091220315479	0.999594483602705	-2.45921	-2.08344	1.38558e-19
rs6019388	4.64255537769e-05	-0.069084	0.996036405208778	-2.76293	2.35208510289e-05	2.69419752857317	0.997207955727383	0.67872623652658	-2.0842	1.38453e-19
rs6063399	3.1093326889e-06	-1.66153	0.999733554490438	-2.73519	1.6504283961e-06	-3.13617	0.999803575838708	0.64920727268728	-2.08599	1.38206e-19
rs57547636	0.00042415814401	1.0701380425441	0.964918715703557	-1.12253	0.00019657161616	1.37531739465351	0.977135632416439	-0.964963	-2.0875	1.37997e-19
rs6090978	4.1243923396e-06	3.43766187723428	0.999646602551319	1.9327128418027	2.1693754944e-06	0.45759939709956	0.999741829789911	-4.02627	-2.09356	1.37163e-19
rs55874131	0.00042660837025	0.760952818998281	0.964723211279983	-1.39295	0.00019817037529	1.5534655083006	0.976953957269888	-0.706311	-2.09926	1.36382e-19
rs116853191	6.86506702249e-05	1.2899293591147	0.994150029778551	-1.74357	3.77664327936e-05	2.17222851415033	0.995524501114506	-0.355839	-2.09941	1.36363e-19
rs2281582	6.620329e-06	2.24095608239409	0.99943286018026	-1.22793	3.5278606276e-06	2.45608701670695	0.999580228826483	-0.872985	-2.10092	1.36157e-19
rs190557876	0.000751308	0.493108354615104	0.939497850309038	-1.28832	0.000370024	1.26646912039925	0.95781158987833	-0.814667	-2.10298	1.35876e-19
rs6019503	6.4548516096e-06	2.8172940676365	0.999447028195417	0.21627665081978	3.4177656384e-06	1.7798476783937	0.999593323422119	-2.32046	-2.10418	1.35713e-19
rs57871089	0.000435306	1.00335506134969	0.96402982407464	-1.17728	0.00020066422336	1.39329784830858	0.976670703444683	-0.931028	-2.10831	1.35155e-19
rs237473	4.1271547716e-06	3.43586146470166	0.99964636593678	1.92686070218788	2.1708191569e-06	0.432781989588494	0.999741658028791	-4.03699	-2.11013	1.34909e-19
rs6090915	7.6750607521e-06	-1.36844	0.999342564499979	-2.72788	4.0973046724e-06	-2.97737	0.999512505157312	0.617100455146612	-2.11078	1.34821e-19
rs150878144	0.00012669978721	-1.76427	0.989256599017955	-0.727128	6.848721049e-05	-1.43628	0.991913385077131	-1.38567	-2.11279	1.3455e-19
rs6019681	1.35090062116e-05	-1.19282	0.998843414466345	-2.67055	7.1661683809e-06	2.86093232273802	0.999147684808395	0.555201727778207	-2.11535	1.34206e-19
rs6019682	1.35090062116e-05	-1.19282	0.998843414466345	-2.67055	7.1661683809e-06	2.86093232273802	0.999147684808395	0.555201727778207	-2.11535	1.34206e-19
rs73113516	1.35087856849e-05	-1.19297	0.998843433325097	-2.67039	7.1660613025e-06	2.86062122938419	0.999147697533014	0.554305104940366	-2.11608	1.34108e-19
rs6063400	3.1335726361e-06	-1.75453	0.999731477874185	-2.57251	1.6639968016e-06	-3.07117	0.999801961327668	0.451592952514901	-2.12091	1.33462e-19
rs60425337	0.00044404604176	0.669145422448321	0.963334138136112	-1.43729	0.00020154345156	1.55988757871603	0.976570878960711	-0.688768	-2.12605	1.32778e-19
rs113674374	4.0309801e-05	2.42783115451252	0.996556741489978	0.101365640380353	2.11612880196e-05	1.2358015190842	0.997487344044985	-2.23152	-2.13016	1.32234e-19
rs117532586	3.79867599556e-05	-0.834499	0.996754531374645	-2.51818	2.078995216e-05	-2.60374	0.997531326995798	0.379318246839074	-2.13887	1.31087e-19
rs238208	5.62116681e-06	-2.27476	0.999518413597066	-1.23319	2.9931422049e-06	-2.47502	0.999643830951964	-0.908278	-2.14147	1.30746e-19
rs117816960	3.687161284e-05	1.91841507196733	0.996849505854989	-1.04574	1.98901728256e-05	1.96530593025759	0.997637917628339	-1.09745	-2.14319	1.30521e-19
rs11697370	3.3237665344e-06	1.76044912018957	0.999715184419421	-2.53269	1.7660283664e-06	3.04046142732444	0.999789820710159	0.3874565390394	-2.14523	1.30256e-19
rs550588902	0.00041538108481	-0.281681	0.965619691164915	-1.64683	0.00022928319241	-1.64216	0.973431850482103	-0.501505	-2.14833	1.29852e-19
rs59420813	0.00043773426841	0.924515225527074	0.963836467590915	-1.24794	0.00020245874944	1.40763100191162	0.976466980928348	-0.907277	-2.15522	1.28961e-19
rs237720	5.6187013444e-06	-2.2561	0.999518624721055	-1.27567	2.9892335236e-06	-2.48608	0.999644295900172	-0.881513	-2.15718	1.28708e-19
rs140948648	0.00052792874289	0.479772987417688	0.956707617820794	-1.45978	0.00024605373321	1.48882131313711	0.971543865357872	-0.702939	-2.16272	1.27997e-19
rs13433101	8.0667928441e-06	2.00081332014182	0.999309032435375	-1.63846	4.2851484036e-06	2.55634136208612	0.999490167017816	-0.524939	-2.1634	1.2791e-19
rs6019566	8.0668496484e-06	1.99865503376499	0.99930902757312	-1.64277	4.2851898049e-06	2.55665267358109	0.999490162094535	-0.524139	-2.16691	1.27462e-19
rs190457367	0.000522488	-0.534732	0.957134643826387	-1.43801	0.00028458677809	-1.4187	0.967233534357085	-0.73579	-2.1738	1.26587e-19
rs113301093	4.02011793936e-05	2.42309681977907	0.996565988072664	0.0886048516876099	2.10967513344e-05	1.20858153063713	0.997494987827219	-2.26623	-2.17762	1.26104e-19
rs192965269	0.00050940941401	-1.32082	0.958162744155749	-0.751197	0.00027691289649	0.775586363554418	0.968088887014087	-1.43123	-2.18243	1.25499e-19
rs6019497	6.4372823524e-06	2.83647198858575	0.999448532481924	0.26910442562451	3.4090083225e-06	1.70525631651637	0.999594365023859	-2.45167	-2.18256	1.25482e-19
rs476496	4.3590758656e-06	-3.42337	0.999626501267103	1.91123004556709	2.2805832256e-06	0.0912088785294273	0.999728598917093	-4.1018	-2.19057	1.24482e-19
rs150521784	3.80735893444e-05	-0.97213	0.996747137077422	-2.39313	2.082918321e-05	-2.53437	0.997526680082921	0.202469347526356	-2.19066	1.2447e-19
rs6125422	0.00017061061924	-1.20108	0.985586882801394	-1.4089	8.94454411536e-05	-1.73815	0.989464816581835	-0.781841	-2.19075	1.2446e-19
rs62212362	6.4398197824e-06	2.84353031115034	0.999448315225919	0.289335078056413	3.4103747584e-06	1.68805233061861	0.999594202498802	-2.48065	-2.19131	1.24389e-19
rs527904716	0.00019685773636	1.26812110672388	0.983406330701605	-1.25864	0.00010463857849	-1.59971	0.98769733362126	-0.935177	-2.19382	1.24078e-19
rs529417657	0.00036312351364	-0.677563	0.969814391130102	-1.52758	0.00019188898576	-1.58877	0.977668132554727	-0.666958	-2.19454	1.23989e-19
rs139836957	0.00075079288036	0.550199630665022	0.939536831845649	-1.26065	0.00037166056225	1.15868454495941	0.957632868765262	-0.937856	-2.19851	1.23497e-19
rs119418	4.1202910225e-06	3.40199029484937	0.999646953847504	1.81027010361854	2.1657242896e-06	0.494278492022506	0.99974226419574	-4.00966	-2.19939	1.23388e-19
rs6012551	6.4408856521e-06	2.84324773729358	0.99944822396566	0.288614388708997	3.4108549225e-06	1.68358014998511	0.999594145387685	-2.48811	-2.1995	1.23375e-19
rs8125035	0.00042720342721	0.989080212299639	0.964675743429098	-1.19973	0.00019789455625	1.34674249155856	0.976985295170626	-0.999824	-2.19956	1.23368e-19
rs113110790	4.43012710464e-05	1.18124166155843	0.996217080373033	-2.0936	2.29062746025e-05	2.38954879284588	0.997280710683992	-0.106484	-2.20009	1.23303e-19
rs181824039	6.37227010225e-05	0.363383087070083	0.994567678542349	-2.54203	3.43287012649e-05	-2.49265	0.995930230403528	0.341919616648943	-2.20011	1.233e-19
rs6012550	6.4403780841e-06	2.84257562682491	0.999448267423866	0.28666548604262	3.4105963684e-06	1.68394177974637	0.999594176140324	-2.48754	-2.20088	1.23205e-19
rs6125493	6.4392615049e-06	2.84139156752326	0.999448363025906	0.283216005943269	3.4100054244e-06	1.68592888628955	0.999594246427699	-2.48428	-2.20106	1.23182e-19
rs61729993	0.00048047324809	-0.0531152	0.960445239069407	-1.61368	0.00022722849081	1.58914296707598	0.973663668298502	-0.58897	-2.20265	1.22987e-19
rs6019501	6.4387032516e-06	2.84072261237616	0.999448410823824	0.281273381860008	3.4097099716e-06	1.68600192793007	0.999594281569107	-2.4842	-2.20293	1.22953e-19
rs6122732	6.4388555001e-06	2.84060232749686	0.999448397788233	0.280943645252532	3.4097838336e-06	1.68618403951131	0.999594272783898	-2.48388	-2.20294	1.22951e-19
rs62212364	6.4391600025e-06	2.8389430750133	0.99944837171659	0.27625787146682	3.4099684921e-06	1.68704274318887	0.999594250820459	-2.48241	-2.20615	1.22557e-19
rs6512548	6.4434237921e-06	2.84374741469987	0.999448006648998	0.290230443444808	3.4122956176e-06	1.67697213139603	0.999593974030253	-2.499	-2.20877	1.22237e-19
rs55787437	6.4461147664e-06	2.8488727490429	0.9994477762467	0.305018403341324	3.4135149049e-06	1.66539833402794	0.999593829007287	-2.51816	-2.21314	1.21704e-19
rs190113369	0.00038132325625	1.69103059787479	0.968349373367966	-0.34196	0.00020307390016	0.0571285718295627	0.976397165863841	-1.8716	-2.21356	1.21652e-19
rs11906065	1.34990842921e-05	-1.17579	0.998844262958504	-2.69106	7.1602802569e-06	2.83121751056666	0.999148384521743	0.470295384744138	-2.22077	1.20779e-19
rs56093859	1.34515831696e-05	-1.16228	0.998848325128946	-2.70859	7.1300214441e-06	2.83746596709622	0.999151980333625	0.485889398204463	-2.22271	1.20545e-19
rs140445286	3.86070851716e-05	-0.934278	0.996701707555129	-2.42218	2.11410522436e-05	-2.52733	0.997489740775635	0.191990411102354	-2.23019	1.19647e-19
rs6019743	1.35554303329e-05	-1.09779	0.998839444436869	-2.77756	7.1887798161e-06	2.85730589775436	0.999144997794772	0.546405038545734	-2.23115	1.19531e-19
rs237466	4.1195197156e-06	3.38450282313294	0.999647019913423	1.75085855398003	2.1648119689e-06	0.543538839009604	0.999742372740088	-3.98432	-2.23346	1.19255e-19
rs201628225	0.00027049394089	1.78489301805225	0.977339987077594	-0.336751	0.00015126786081	0.486916928880975	0.982311963204893	-1.90099	-2.23774	1.18747e-19
rs182531015	4.85595741409e-05	2.6039575401774	0.995854967810476	0.633322181242617	2.66783613121e-05	0.0988567523247327	0.996834329780255	-2.87282	-2.2395	1.18537e-19
rs146871031	0.00075073260025	0.554105001916093	0.939541392852331	-1.25866	0.00037122499584	1.11894307424016	0.957680419536688	-0.981729	-2.24039	1.18432e-19
rs238158	5.6227317129e-06	-2.21067	0.999518279590562	-1.37672	2.9941457296e-06	-2.49128	0.999643711580058	-0.867754	-2.24447	1.1795e-19
rs11907908	1.35484358724e-05	-1.09705	0.998840042576798	-2.77863	7.18508025e-06	2.85228129080395	0.999145437429057	0.531817713939461	-2.24681	1.17674e-19
rs182504041	0.00071922121489	0.381899672984492	0.941931733449569	-1.35438	0.000353891	1.21168403146928	0.959576574595698	-0.899758	-2.25414	1.16815e-19
rs59960348	1.34581123609e-05	-1.20339	0.998847766767805	-2.65978	7.1359505424e-06	2.80866388152674	0.999151275746041	0.405060672867187	-2.25472	1.16747e-19
rs6019738	1.34515831696e-05	-1.23061	0.998848325128946	-2.62695	7.1320509481e-06	2.79591401151057	0.999151739156314	0.369090909655191	-2.25785	1.16381e-19
rs148970263	6.67489e-05	0.196399020807834	0.994311164537337	-2.56545	3.60458545924e-05	-2.46473	0.995727526534284	0.29669033212791	-2.26876	1.15119e-19
rs16984419	3.895632225e-05	1.68900104141633	0.996671970720512	-1.43107	2.10145229056e-05	2.08049239119053	0.99750472720498	-0.837855	-2.26893	1.151e-19
rs61452497	0.00046112408644	0.63004219094897	0.961977584428499	-1.44386	0.00020836633801	1.45525774338582	0.975796925416917	-0.827379	-2.27124	1.14834e-19
rs192794786	0.000286354	1.76053657960052	0.976043169942199	-0.353133	0.00015369056784	0.422881779756719	0.982033761180544	-1.92182	-2.27496	1.14408e-19
rs6019499	6.4354049761e-06	2.84403246597104	0.999448693223868	0.29042113499461	3.4080113664e-06	1.63724215635292	0.999594483602705	-2.56544	-2.27502	1.14401e-19
rs761498	1.34829964864e-05	-1.12453	0.998845638741424	-2.75055	7.1499016449e-06	2.83210106472496	0.999149617863195	0.472075481002289	-2.27847	1.14007e-19
rs140768457	0.00025933237444	0.0841528086538581	0.978254689226605	-1.91071	0.00013687362049	1.85411092971374	0.983968124942498	-0.375281	-2.286	1.13152e-19
rs142226096	0.00069412752369	0.877963888667479	0.943843967847963	-1.07604	0.00026335772089	1.04969713401897	0.969603487480441	-1.21253	-2.28857	1.12861e-19
rs3818064	1.34797653904e-05	-1.17129	0.998845915055928	-2.69706	7.1476557201e-06	2.80865977684767	0.999149884757873	0.405862455004193	-2.2912	1.12565e-19
rs73116127	1.36099015056e-05	-1.19237	0.998834786291767	-2.66739	7.2331413025e-06	2.79540798304486	0.999139726171465	0.374661767393094	-2.29272	1.12393e-19
rs191925688	0.00042823749721	0.947114850269886	0.964593266502891	-1.23779	0.00022060269729	1.25926599204185	0.974411963576527	-1.06023	-2.29802	1.11799e-19
rs6019712	1.34782968384e-05	-1.15398	0.998846040642533	-2.71721	7.1471744964e-06	2.81332525379476	0.999149941944154	0.418932517592975	-2.29828	1.11771e-19
rs7273834	1.34803528336e-05	-1.1761	0.998845864819378	-2.6914	7.14813696e-06	2.80331388390186	0.999149827569674	0.390908111676856	-2.30049	1.11524e-19
rs6019722	1.34802059716e-05	-1.17446	0.998845877378618	-2.69332	7.1479765449e-06	2.8034762508556	0.99914984663262	0.391351766976799	-2.30197	1.11359e-19
rs73113584	1.34780765625e-05	-1.15662	0.998846059479937	-2.71417	7.1473349025e-06	2.80995	0.999149922882274	0.409471363427437	-2.3047	1.11055e-19
rs6012630	1.34802059716e-05	-1.17465	0.998845877378618	-2.6931	7.1480834881e-06	2.80238181620967	0.999149833924013	0.388294176626472	-2.3048	1.11044e-19
rs58969602	1.34802059716e-05	-1.17448	0.998845877378618	-2.6933	7.1480834881e-06	2.80208633335702	0.999149833924013	0.387466868456093	-2.30583	1.1093e-19
rs6012627	1.34789576769e-05	-1.14544	0.998845984129403	-2.727	7.1475487801e-06	2.8131580817583	0.999149897466101	0.418488607125129	-2.30851	1.10633e-19
rs573791144	6.25106865769e-05	0.143701850533178	0.994670451368186	-2.60697	3.37450619025e-05	-2.47818	0.995999145757306	0.29779108820652	-2.30918	1.10559e-19
rs143881939	5.96036497156e-05	1.87671786475725	0.99491704029383	-0.888847	3.18217835664e-05	1.65671112623824	0.996226311400058	-1.42268	-2.31153	1.10299e-19
rs6019710	1.34789576769e-05	-1.14721	0.998845984129403	-2.72497	7.1475487801e-06	2.81101481583997	0.999149897466101	0.412466681689681	-2.3125	1.10192e-19
rs7268632	1.348211524e-05	-1.12677	0.998845714103194	-2.74807	7.1482439044e-06	2.81712808850921	0.999149814860924	0.429703498588869	-2.31836	1.09548e-19
rs3818065	1.35449025156e-05	-1.16565	0.998840344736441	-2.70123	7.1827216036e-06	2.79940374469228	0.999145717716676	0.382358864303726	-2.31887	1.09492e-19
rs7689	5.6224471689e-06	-2.21372	0.999518303956765	-1.37	2.9939726961e-06	-2.45827	0.999643732162846	-0.949443	-2.31944	1.0943e-19
rs185957282	0.00056655424576	-1.07097	0.95368685852315	-0.989239	0.00029945610304	-0.853676	0.965580451595332	-1.33273	-2.32196	1.09154e-19
rs189138237	0.00071935531264	0.368806672433335	0.941921535506344	-1.35892	0.00035402680336	1.15573247730607	0.959561727376892	-0.963138	-2.32206	1.09144e-19
rs58065519	1.25647563024e-05	-1.13269	0.998924170285699	-2.77653	6.6441764169e-06	2.83792088080912	0.999209719365777	0.452153862590567	-2.32438	1.08891e-19
rs183829703	0.00014146009969	1.68821	0.988020004862069	-0.804299	7.45525179844e-05	-1.30584	0.991203524682285	-1.5216	-2.32589	1.08726e-19
rs73113562	1.347770944e-05	-1.13089	0.998846090875269	-2.74358	7.1473883716e-06	2.81281934272441	0.999149916528266	0.417525411680948	-2.32606	1.08709e-19
rs545300987	0.00044363733129	-0.167527	0.963366649954913	-1.63988	0.000214505	1.54214802676499	0.975101598687387	-0.686973	-2.32685	1.08622e-19
rs533158502	0.00040001200009	-0.185067	0.966849591670775	-1.68679	0.00020398409329	1.58703430119799	0.976293883976247	-0.641526	-2.32832	1.08463e-19
rs76784588	0.00011459060209	1.26801311573421	0.990273399941458	-1.52034	5.91113407921e-05	-1.83451	0.993012703871633	-0.810882	-2.33122	1.08149e-19
rs238201	5.6408625025e-06	-2.24609	0.999516727008838	-1.29623	3.003289e-06	-2.42233	0.999642623965273	-1.03558	-2.33181	1.08085e-19
rs149204045	0.00011452852324	1.21653366723355	0.990278618050166	-1.58393	5.91248731329e-05	-1.86859	0.993011115451527	-0.748102	-2.33203	1.08061e-19
rs6019703	1.35105499489e-05	-1.18295	0.99884328245079	-2.68221	7.1655259225e-06	2.78682780133366	0.999147761154688	0.346073311567172	-2.33613	1.07619e-19
rs74368908	4.04474376289e-05	2.63352951258131	0.996545025204966	0.621787838005034	2.15157750201e-05	-0.217305	0.997445360379126	-2.96137	-2.33958	1.07248e-19
rs117345481	5.02145138884e-05	-0.4109	0.995714308017879	-2.64218	2.64860505316e-05	2.5261830462104	0.996857077771263	0.299470821127573	-2.34271	1.06913e-19
rs237713	5.6343567424e-06	-2.21173	0.999517284111666	-1.37336	3.0002050521e-06	-2.44908	0.999642990808292	-0.970957	-2.34431	1.06742e-19
rs2134618	1.4085009e-05	-1.12173	0.998794158943407	-2.73191	7.4663923009e-06	2.79404348446644	0.999112009092951	0.386598839147596	-2.34531	1.06636e-19
rs2134617	1.40817065536e-05	-1.12054	0.998794441330493	-2.73336	7.4647529089e-06	2.79454792344547	0.999112203895569	0.387898200491025	-2.34546	1.0662e-19
rs1885289	7.7832630225e-06	-1.41817	0.999333302216614	-2.65165	4.1567869924e-06	-2.86832	0.999505431486842	0.305671400623308	-2.34598	1.06564e-19
rs498646	4.3681836004e-06	-3.37505	0.999625721181067	1.74810769897433	2.2882915441e-06	0.108311573269166	0.999727681837522	-4.09841	-2.3503	1.06105e-19
rs6019695	1.35545467225e-05	-1.2405	0.998839519999864	-2.61093	7.1899595881e-06	2.75516985466602	0.999144857597813	0.260113512433612	-2.35082	1.0605e-19
rs111338189	9.93711916201e-05	0.768903276417439	0.991554332911974	-2.09394	5.460027664e-05	2.13496724949927	0.993542493911279	-0.25693	-2.35087	1.06044e-19
rs117241656	3.27282391396e-05	1.71344518131889	0.997202545945351	-1.47568	1.767025296e-05	2.10190075173661	0.997900993631079	-0.878789	-2.35447	1.05663e-19
rs563521157	0.00037591393225	-0.45605	0.968784343189338	-1.63267	0.00019565575129	-1.54669	0.977239737252474	-0.722462	-2.35513	1.05593e-19
rs80306164	5.65863513121e-05	1.52159087736743	0.995173111477817	-1.51474	3.07489103289e-05	1.98605272696779	0.996353077526802	-0.841926	-2.35667	1.05431e-19
rs140366873	0.00011168473761	1.50789640521948	0.990517714676489	-1.20307	5.77446490201e-05	-1.64218	0.99317315171714	-1.15428	-2.35735	1.0536e-19
rs183043994	0.000355586	0.0500765763376995	0.970422398187163	-1.75915	0.00018561882564	1.63851088504279	0.978382073207553	-0.603776	-2.36293	1.04773e-19
rs149257976	5.61401037289e-05	0.135443039664098	0.995210994674575	-2.66159	3.01092540961e-05	2.50047838693393	0.996428671931767	0.297622537718278	-2.36397	1.04665e-19
rs2734902	6.6221816896e-06	-2.19341	0.999432701557031	-1.33316	3.5280484561e-06	-2.39073	0.999580206486629	-1.03128	-2.36444	1.04615e-19
rs3091976	6.6215126329e-06	2.18353975353933	0.999432758840196	-1.35479	3.5294761161e-06	2.39747377161746	0.999580036684337	-1.01494	-2.36973	1.04063e-19
rs141911469	0.00035968639716	-0.488902	0.970091565166849	-1.63887	0.00019048140225	-1.54856	0.977828313839548	-0.73204	-2.37091	1.0394e-19
rs8125088	1.40239015225e-05	-1.10752	0.998799384175196	-2.7499	7.4342930281e-06	2.79067626595858	0.999115823339346	0.375067246007563	-2.37483	1.03533e-19
rs183011342	0.00045924918601	-1.17593	0.962126325944352	-0.971524	0.00025303583041	-0.860842	0.970759995959887	-1.40642	-2.37794	1.03212e-19
rs138005296	4.05540986041e-05	-1.50989	0.996535945904509	-1.69672	2.186404081e-05	2.14553348018563	0.99740411696381	-0.681232	-2.37796	1.03211e-19
rs185690603	0.00018965972089	1.21752579565341	0.984003365030041	-1.33836	9.67506337161e-05	1.55651731005603	0.988614183251191	-1.04011	-2.37847	1.03157e-19
rs3091977	7.81510808961e-05	2.32750887695115	0.993345852616219	0.184367561919468	4.285928089e-05	-0.397203	0.994924038276907	-2.56313	-2.37877	1.03127e-19
rs141992689	4.42174461444e-05	-0.682325	0.996224211219307	-2.55767	2.41908552964e-05	-2.49367	0.997128651190481	0.173772463689587	-2.3839	1.02599e-19
rs238216	5.6217832609e-06	-2.20259	0.999518360808847	-1.39463	2.9936958529e-06	-2.4387	0.999643765094073	-0.997393	-2.39202	1.01769e-19
rs13041133	6.94638736e-06	-1.07464	0.999404944552282	-3.13634	3.7123270276e-06	-3.03554	0.999558289333376	0.742778744838617	-2.39356	1.01612e-19
rs6019569	6.6210494596e-06	2.22982814771058	0.99943279849608	-1.25274	3.5290628164e-06	2.34400451404784	0.999580085841159	-1.14171	-2.39445	1.01523e-19
rs171132	5.6222574769e-06	-2.21691	0.999518320200559	-1.36296	2.9938688784e-06	-2.42401	0.999643744512234	-1.03306	-2.39602	1.01363e-19
rs73113528	1.35538104025e-05	-1.24315	0.998839582967154	-2.60768	7.1883508321e-06	2.73605708083592	0.999145048772643	0.20757102144241	-2.40011	1.0095e-19
rs142016814	0.00022663495936	-1.53711	0.980944158507669	-0.821356	0.00012300362649	1.0464262850857	0.985569260075213	-1.57959	-2.40095	1.00864e-19
rs73113540	1.35066540196e-05	-1.16485	0.998843615618468	-2.70357	7.1627422689e-06	2.77111193313231	0.999148091949209	0.302243766599881	-2.40133	1.00826e-19
rs57950	5.6241071104e-06	-2.21135	0.999518161811902	-1.37509	2.9948379136e-06	-2.42671	0.999643629242964	-1.02637	-2.40145	1.00814e-19
rs137998628	3.50640438201e-05	2.41694235741342	0.997003490746037	0.00689933487328442	1.88757229444e-05	1.13315318716021	0.997758119809445	-2.40964	-2.40274	1.00684e-19
rs151273860	0.00011901937216	-2.14115	0.989901276460207	-0.0285584	6.142954129e-05	-0.421483	0.992740668643916	-2.37455	-2.40311	1.00647e-19
rs6012624	1.35082711296e-05	-1.18183	0.998843477328256	-2.68362	7.1635451904e-06	2.76112281802965	0.999147996534285	0.274691874743555	-2.40892	1.00063e-19
rs73264221	0.00040704676516	0.734523231261834	0.966286250800106	-1.43426	0.00018759959089	1.38238407791658	0.978156424245087	-0.977303	-2.41156	9.98e-20
rs111736378	0.00040806828049	0.7475186503438	0.966204502884167	-1.42376	0.00018943668496	1.36684443023628	0.977947235331367	-0.993627	-2.41739	9.92197e-20
rs533276395	0.00016142464809	1.15377047373931	0.986352319016025	-1.49058	8.90503632225e-05	1.64854053080277	0.989510862085462	-0.934118	-2.4247	9.84971e-20
rs237464	4.1217932484e-06	3.33274226438514	0.999646825175096	1.57735042935062	2.1664012969e-06	0.498492394029364	0.999742183648075	-4.00742	-2.43007	9.79701e-20
rs113273435	0.00070009455649	0.762242387364745	0.943388554058589	-1.16171	0.00035405314569	-0.83586	0.959558840141126	-1.26875	-2.43046	9.79314e-20
rs911412	6.6243949641e-06	-2.15762	0.999432512061377	-1.41081	3.5312047225e-06	-2.39527	0.999579831088314	-1.01996	-2.43078	9.79006e-20
rs116599250	4.54959693049e-05	-0.362625	0.99611546045533	-2.70988	2.34988379536e-05	2.53905057389697	0.997210561502052	0.273439983978796	-2.43644	9.73474e-20
rs6066841	8.32774879225e-05	1.02837058182157	0.992912460034984	-1.94968	4.57859282409e-05	2.06478061872186	0.994579304949204	-0.488661	-2.43834	9.71624e-20
rs237463	4.1219962729e-06	3.33020731232792	0.999646807785137	1.56893280553091	2.16648961e-06	0.497627556219852	0.999742173140931	-4.00783	-2.43889	9.7109e-20
rs117604009	0.00037480572801	-0.479293	0.968873503370426	-1.62356	0.000198528	-1.47747	0.976913316436901	-0.817994	-2.44156	9.68508e-20
rs74923384	5.6766398049e-06	2.26749686263153	0.999513663329289	-1.24478	3.0265908841e-06	2.35124244845405	0.999639852158831	-1.20132	-2.44611	9.64111e-20
rs6012573	6.6219758224e-06	2.21477701957005	0.999432719182927	-1.2861	3.5295512641e-06	2.33263249783096	0.999580027746425	-1.16822	-2.45432	9.56228e-20
rs58075688	4.55924749284e-05	-0.336922	0.996107252682121	-2.71778	2.35557827649e-05	2.53416655849574	0.997203820747773	0.262270868102204	-2.45551	9.55086e-20
rs6066955	3.23515238656e-05	1.55752974767223	0.997234656729763	-1.7357	1.74634559449e-05	2.1786557803074	0.997925507585771	-0.720672	-2.45637	9.54265e-20
rs73611313	6.6222331569e-06	2.2083921084026	0.999432697150514	-1.30019	3.5296639876e-06	2.33385141105209	0.999580014339378	-1.16536	-2.46555	9.45545e-20
rs538669205	0.00030169605636	-1.19445	0.974791991884554	-1.14493	0.00015363354601	-1.18337	0.982040307247115	-1.32221	-2.46714	9.44045e-20
rs144582521	5.61089385481e-05	0.146557213784228	0.99521364048108	-2.6603	3.00799596304e-05	2.45656866963745	0.996432134218698	0.188705420491439	-2.4716	9.39844e-20
rs568224039	0.00028154155264	1.10980857251836	0.976436306528732	-1.2727	0.00015103181025	-1.29133	0.982339077568987	-1.19916	-2.47186	9.39602e-20
rs117126031	0.00010640128801	2.09205921416176	0.990962237296072	-0.184594	5.68004902921e-05	0.650904053679307	0.993284025015716	-2.29122	-2.47581	9.35893e-20
rs80097756	0.00043058740036	0.472165142212755	0.964405891786612	-1.56029	0.00020835767716	1.38666814459701	0.97579790708208	-0.922502	-2.48279	9.29387e-20
rs41283562	4.92213093241e-05	-0.0705191	0.995798719584781	-2.73371	2.54581802721e-05	2.51402704529284	0.996978679739012	0.249587433384123	-2.48412	9.2815e-20
rs13044742	6.9425399169e-06	-1.07948	0.999405273943701	-3.13142	3.7117104964e-06	-3.00178	0.99955836265885	0.640826600102062	-2.49059	9.22164e-20
rs376345539	0.00060399943696	0.651519343760681	0.950776561856684	-1.3039	0.00030415708801	-0.99914	0.965058999127846	-1.19535	-2.49925	9.14214e-20
rs568621844	0.00017025291361	1.94409147692001	0.985616666983141	-0.258278	9.15950444809e-05	-0.210898	0.989214359896555	-2.24277	-2.50105	9.1257e-20
rs1847329	3.8153027584e-06	1.95770703636959	0.999673078150695	-2.09721	2.0333619216e-06	2.74184409099835	0.999758012398889	-0.405367	-2.50258	9.11173e-20
rs11906639	4.30105118976e-05	1.09823519724804	0.996326894444345	-2.20251	2.21776006761e-05	2.31254684868909	0.99736698651916	-0.302917	-2.50543	9.08579e-20
rs4989845	2.93734732729e-05	0.78996555178948	0.997488575209205	-2.68221	1.55790458209e-05	2.57882509127116	0.998148943220668	0.173015062821253	-2.5092	9.05163e-20
rs6019811	0.00070636882176	0.619420113178015	0.942910165547752	-1.25068	0.00033240217761	0.881871883895809	0.961937757947717	-1.26022	-2.51089	9.03629e-20
rs117098248	3.91218975625e-05	-0.688277	0.996657872935808	-2.6145	2.15113222809e-05	-2.48606	0.99744588771735	0.0973178904279246	-2.51719	8.97962e-20
rs113459980	9.89957341156e-05	0.846850043117051	0.991585974962913	-2.03337	5.34391702441e-05	2.03018791525825	0.993678948482085	-0.48413	-2.5175	8.97682e-20
rs141079257	0.00022756325904	-1.75266	0.980867598878938	-0.471655	0.00012206051361	0.384209954652836	0.985678321097634	-2.05024	-2.52189	8.93744e-20
rs111390401	0.00065276162064	0.877784823008157	0.94701321199013	-1.10402	0.00032008430281	0.697533382892979	0.963296466344282	-1.41809	-2.52211	8.9355e-20
rs6019576	6.6361881664e-06	2.1751537219341	0.999431502354766	-1.37195	3.5394778225e-06	2.33924575437851	0.999578847108136	-1.15137	-2.52333	8.92462e-20
rs77208144	0.00038896911729	-0.13067	0.967735226882725	-1.70863	0.00020398123684	-1.46871	0.976294208070584	-0.818032	-2.52666	8.89494e-20
rs78713305	0.00066422175625	0.213237753419342	0.946133065504508	-1.43911	0.00033964647025	-1.05424	0.961140473380035	-1.08979	-2.52889	8.87509e-20
rs192076148	0.000283485	1.62385816950763	0.976277543044974	-0.583486	0.00015166415104	0.37918101208263	0.982266445994028	-1.94553	-2.52902	8.87398e-20
rs80031368	3.86124289321e-05	0.710521106746338	0.996701252531305	-2.60552	2.03630172516e-05	2.48757905747096	0.997581900180761	0.0741564998616955	-2.53136	8.85322e-20
rs2426131	6.6376823769e-06	-2.1407	0.999431374424076	-1.44614	3.54041856e-06	-2.36566	0.99957873521948	-1.08914	-2.53528	8.81858e-20
rs186652349	9.96564954961e-05	-0.979597	0.991530289997125	-1.90989	5.35035194521e-05	-1.95662	0.99367138510744	-0.629273	-2.53916	8.78443e-20
rs11908249	6.9405375601e-06	-1.05797	0.999405445371701	-3.15453	3.7108628496e-06	-2.99324	0.999558463471451	0.615127852236784	-2.5394	8.78234e-20
rs237457	4.1314221081e-06	3.30196940848868	0.999646000420724	1.47646374158269	2.1723517321e-06	0.465561201989294	0.999741475689263	-4.02191	-2.54545	8.72936e-20
rs3091595	6.6209465344e-06	2.15202944285537	0.999432807308311	-1.4231	3.5278230625e-06	2.35043790762678	0.999580233294383	-1.12679	-2.54989	8.6907e-20
rs114395244	0.00011215021801	1.4310346455652	0.990478570634046	-1.31292	5.79174271225e-05	-1.5878	0.993152864928476	-1.24004	-2.55297	8.664e-20
rs553707446	0.00030011751121	1.52277489479852	0.974920578315547	-0.71251	0.00016260330256	0.533310329684118	0.981011657148581	-1.84246	-2.55497	8.6467e-20
rs117277835	4.94007962449e-05	-0.247247	0.995783464092564	-2.70393	2.54406245769e-05	2.47244675219623	0.9969807569194	0.145893608114861	-2.55804	8.62015e-20
rs183316212	0.00019019443921	1.41114921942412	0.983958988270257	-1.0866	0.00010093216225	-1.22761	0.988127934372305	-1.47221	-2.55882	8.61345e-20
rs41283572	5.2099524e-05	1.47889997229149	0.995554142043703	-1.61918	2.77751134441e-05	1.95789	0.996704617385246	-0.947263	-2.56644	8.54802e-20
rs369353828	0.00060523872256	0.694483285639958	0.950680546340377	-1.27546	0.00030313247449	-0.892434	0.965172605441632	-1.29433	-2.56978	8.51951e-20
rs117269123	0.00012988249156	0.315428285629047	0.988989695705099	-2.20526	6.965237764e-05	2.02566560425603	0.991776939480972	-0.365617	-2.57088	8.51019e-20
rs184868911	0.00018868044321	1.35240716069336	0.984084646554385	-1.17029	0.00010011403249	-1.2854	0.988223032917709	-1.40441	-2.5747	8.47774e-20
rs549149913	0.00040793092729	0.663123288756418	0.966215493923965	-1.48144	0.00022506	-1.22412	0.973908443499199	-1.09339	-2.57483	8.47665e-20
rs13036390	2.267283456e-05	-2.27077	0.99806036696109	-0.54943	1.228572601e-05	-1.57489	0.998539674444503	-2.02621	-2.57564	8.46973e-20
rs141514235	0.00042979094596	-0.125076	0.96446939068102	-1.66114	0.00022551329241	-1.36372	0.973857266880309	-0.916537	-2.57767	8.45256e-20
rs6019504	6.2036861184e-06	2.71760776000514	0.999468533510999	-0.0792018	3.28588129e-06	1.68671594858498	0.999609010075534	-2.50147	-2.58067	8.4273e-20
rs117311315	4.10379890881e-05	2.38513664341275	0.996494757780413	0.00772013128523685	2.25019307044e-05	-0.866172	0.997328583625529	-2.58845	-2.58073	8.42678e-20
rs188994173	0.00017222362756	1.90518463203133	0.985452598821154	-0.326709	9.27981569124e-05	-0.080441	0.989074237017933	-2.25512	-2.58182	8.41755e-20
rs113139453	6.37498449225e-05	-0.389136	0.994565377117125	-2.53218	3.14755782961e-05	2.34710737909313	0.99626721401329	-0.0511255	-2.58331	8.40509e-20
rs1503485	3.10605376e-06	-1.40638	0.999733835394231	-3.127	1.6486046404e-06	-3.10137	0.999803792848665	0.540141666325687	-2.58686	8.37525e-20
rs1535268	6.6550068729e-06	2.15002732844135	0.999429891145015	-1.42485	3.5503980625e-06	2.33379859360488	0.999577548287238	-1.16256	-2.58741	8.37066e-20
rs79828404	0.00011537982225	1.24797281571475	0.990207065931913	-1.54195	5.950271044e-05	-1.69202	0.992966767129196	-1.05716	-2.59911	8.27328e-20
rs117789595	0.00060451565161	0.67014141677072	0.950736564993387	-1.2918	0.00030287137024	-0.873311	0.965201560235502	-1.31103	-2.60283	8.24258e-20
rs138841096	0.00046793044489	-1.12461	0.96143800175271	-1.01975	0.00025387004889	-0.609669	0.970666424109134	-1.58411	-2.60387	8.23404e-20
rs190595744	0.00082074228196	-0.532598	0.93427388520095	-1.22862	0.00042793955689	0.537973673906423	0.951528361057459	-1.37569	-2.60432	8.23034e-20
rs184129613	0.00024944411844	-1.41225	0.979066473742071	-0.956852	0.00013437678241	0.932488505102613	0.984255972800927	-1.64772	-2.60458	8.2282e-20
rs181957749	0.00082338580809	-0.378722	0.93407614405727	-1.29264	0.00042660010849	0.646509443554127	0.951672744998307	-1.31599	-2.60863	8.19489e-20
rs3092281	3.1660508356e-06	2.22626367079929	0.999728695507185	-1.62868	1.6809381801e-06	2.5600111067404	0.999799945472283	-0.982287	-2.61097	8.17576e-20
rs112544615	0.00066358275201	0.165894542334851	0.946182098410315	-1.44805	0.00033929271601	-0.978947	0.961179375789224	-1.16384	-2.61189	8.16824e-20
rs371288999	0.00024211048801	1.45100546918682	0.979669404846064	-0.916508	0.00012836210209	-0.903166	0.984950066907752	-1.69647	-2.61298	8.15932e-20
rs150070215	0.00042989460921	0.5493997752473	0.964461125451071	-1.52301	0.00021751235289	1.23768163110325	0.974761370360978	-1.09309	-2.6161	8.13392e-20
rs77823273	4.45560255009e-05	1.28785488604546	0.996195409457957	-1.95964	2.29414176784e-05	2.14511495452761	0.99727655008048	-0.658435	-2.61808	8.11784e-20
rs140405367	0.00011192582025	1.39768420057659	0.990497440721065	-1.36062	5.78367855025e-05	-1.57687	0.993162333383446	-1.25789	-2.61851	8.11435e-20
rs6063398	3.1051726225e-06	-1.43744	0.999733910880758	-3.08299	1.6480654129e-06	-3.0761	0.999803857011738	0.461922566156622	-2.62107	8.09359e-20
rs4809721	1.32780800881e-05	-1.86818	0.99886316293463	-1.64668	7.1362711044e-06	-2.2624	0.999151237651911	-0.978811	-2.62549	8.05787e-20
rs182879059	0.00013407555681	-0.886425	0.988638282760656	-1.85034	7.43137098916e-05	-1.79247	0.99123145465346	-0.775896	-2.62624	8.05187e-20
rs112175607	5.94444084004e-05	-1.97785	0.994930551444469	-0.696222	3.25455417169e-05	1.3028254806858	0.996140813441734	-1.93325	-2.62947	8.02589e-20
rs148736514	0.00011193428401	1.42114764789837	0.990496728972357	-1.32783	5.78446950249e-05	-1.54315	0.993161404686817	-1.31008	-2.63791	7.95847e-20
rs4810869	1.32069735396e-05	-1.82037	0.998869244021125	-1.73743	7.0930603584e-06	-2.29747	0.999156372646521	-0.901947	-2.63938	7.94674e-20
rs237738	5.2578948601e-06	-2.38507	0.999549522444736	-1.0096	2.8032470041e-06	-2.17864	0.999666419999411	-1.63038	-2.63998	7.94199e-20
rs140101010	0.00070108977961	0.733500515520373	0.943312639747193	-1.18134	0.00035616748176	-0.540207	0.959327156215808	-1.46112	-2.64246	7.92231e-20
rs186417995	0.00069009713809	0.838650612683053	0.944151822402254	-1.11053	0.000346518	-0.409215	0.960385409657073	-1.53387	-2.6444	7.90696e-20
rs149864151	0.00021115867969	1.6221397947878	0.982222296036092	-0.722626	0.00011778543841	0.664954067576408	0.986172991130972	-1.92254	-2.64517	7.9009e-20
rs9712464	7.8900315664e-06	-1.49358	0.999324162830772	-2.53514	4.2206415364e-06	-2.71579	0.999497837980502	-0.112392	-2.64753	7.88226e-20
rs62209204	5.53350015625e-05	0.603047555032768	0.995279349329888	-2.49693	2.95217268921e-05	2.3130494958028	0.996498115849276	-0.161496	-2.65843	7.79683e-20
rs543770101	0.00012012379201	-1.72538	0.989808522124234	-0.819809	6.31921654225e-05	-1.105	0.992533928686948	-1.84273	-2.66254	7.76479e-20
rs187765254	0.00076536882409	-0.388895	0.938435262719046	-1.32287	0.00039819803401	0.657998787265283	0.954744654829665	-1.34103	-2.6639	7.75425e-20
rs543907919	0.00035914798144	-0.844954	0.970134998141663	-1.40922	0.00019048140225	-1.15017	0.977828313839548	-1.25769	-2.66691	7.73097e-20
rs550508474	0.00011191735681	1.40587573612122	0.990498152443886	-1.34928	5.78506275216e-05	-1.53748	0.993160708123815	-1.3187	-2.66798	7.72269e-20
rs6019902	5.32317184e-06	-1.03939	0.999543932298097	-3.30652	2.8327582864e-06	3.04531573068422	0.999662909407905	0.637831447250403	-2.66868	7.71726e-20
rs141917325	0.00047317995729	0.485815553931236	0.961022253303265	-1.50897	0.00022678854025	1.15581526611109	0.973713319239632	-1.16895	-2.67792	7.64628e-20
rs35367415	0.00041338615761	0.243104677870735	0.965779157105069	-1.65892	0.00019585442704	1.33406693914883	0.977217152226461	-1.02128	-2.6802	7.62888e-20
rs8123538	7.36974174784e-05	0.104935163872555	0.993722677887369	-2.52993	3.95110302084e-05	-2.25492	0.995318725983355	-0.151673	-2.68161	7.61816e-20
rs140415890	0.000489117	0.362314161692892	0.959762242666092	-1.54348	0.00023045668864	1.17592616989882	0.973299502511343	-1.1386	-2.68208	7.6146e-20
rs80117391	1.31766822009e-05	-1.92661	0.998871834582103	-1.53975	7.0832096449e-06	-2.18627	0.999157543273845	-1.15172	-2.69148	7.54334e-20
rs4809722	1.32780800881e-05	-1.86851	0.99886316293463	-1.64606	7.1373931281e-06	-2.23254	0.999151104315744	-1.04579	-2.69186	7.54047e-20
rs41304657	3.50294708449e-05	1.73895045593784	0.997006436444849	-1.3982	1.89026691984e-05	1.86742016505203	0.997754926572941	-1.30979	-2.70799	7.4198e-20
rs577933520	0.00015841998225	-0.620191	0.986602945869282	-1.96662	8.44241218276e-05	1.77620137000912	0.990050359883854	-0.743359	-2.70998	7.40508e-20
rs77785613	6.42671582224e-05	0.539144633439279	0.994521518179397	-2.45892	3.403788964e-05	2.24243255287786	0.995964567858353	-0.252215	-2.71114	7.3965e-20
rs149472396	0.00011460130704	1.55331988192654	0.990272500130206	-1.12173	6.05833392609e-05	1.33033469389853	0.992839951132617	-1.59106	-2.71279	7.38425e-20
rs146526094	0.00039929231329	0.986908413946342	0.966907260909824	-1.23334	0.00018874088689	0.935909100834892	0.978026454955938	-1.48062	-2.71396	7.37563e-20
rs147986603	4.021208569e-05	-0.754776	0.996565059649521	-2.55301	2.19825011025e-05	-2.37498	0.997390089067725	-0.161322	-2.71433	7.37288e-20
rs144263892	0.00028153819681	0.921443939186249	0.976436580777608	-1.4595	0.00015071245225	-1.2465	0.982375763571746	-1.25605	-2.71555	7.36392e-20
rs58130233	4.61208049129e-05	-0.245552	0.996062320778662	-2.73855	2.38521861769e-05	2.43339810437215	0.997168735922285	0.0188146081043517	-2.71974	7.33315e-20
rs117811331	3.623799204e-05	-0.916188	0.996903477925432	-2.47034	1.97486027236e-05	-2.35989	0.997654690532887	-0.249664	-2.72	7.33122e-20
rs13044588	7.8412320484e-06	-1.50122	0.999328340048078	-2.5268	4.1964341904e-06	-2.68398	0.999500716675685	-0.201101	-2.7279	7.27354e-20
rs112036857	0.00029875739716	-1.08324	0.975031398816694	-1.27302	0.00015225338881	-1.06678	0.982198774960598	-1.45536	-2.72838	7.27004e-20
rs13044274	7.8400560001e-06	-1.49545	0.999328440717727	-2.53552	4.1952051684e-06	-2.68663	0.999500862829271	-0.194125	-2.72964	7.26088e-20
rs548780227	0.00039513090841	-0.202164	0.967240853479869	-1.68952	0.00019248510121	1.3255104909218	0.977600311162128	-1.04054	-2.73006	7.25782e-20
rs4809723	1.32958683225e-05	-1.82384	0.998861641682777	-1.72778	7.1506503649e-06	-2.25134	0.999149528889017	-1.00275	-2.73053	7.25443e-20
rs76577546	6.41823697321e-05	0.622831992950037	0.994528706465496	-2.41122	3.39990449569e-05	2.21059636040591	0.995969154606499	-0.32337	-2.73459	7.22503e-20
rs180680293	0.00051266	-1.08803	0.957907001517052	-1.01695	0.00027625431681	0.0835460173636807	0.968162364669898	-1.72017	-2.73713	7.20675e-20
rs117204676	6.46845407289e-05	0.696845699251617	0.994486134409396	-2.35879	3.42654524689e-05	2.18102489549291	0.995937698275847	-0.38423	-2.74302	7.16442e-20
rs139997734	0.00017435882025	-0.796789	0.985274898924261	-1.79634	9.38871854116e-05	-1.6243	0.988947435375787	-0.947955	-2.74429	7.15527e-20
rs78382345	1.32009415561e-05	-1.891	0.998869759884381	-1.60674	7.0960968225e-06	-2.19143	0.99915601180338	-1.13952	-2.74626	7.14122e-20
rs367572441	0.00059162778756	0.618499058519779	0.951736138294312	-1.3335	0.00029575056676	-0.757876	0.965991882154364	-1.41316	-2.74665	7.1384e-20
rs139084450	0.00038039431369	1.09928372565206	0.968424042902426	-1.14255	0.00019574248464	0.766110586957143	0.977229877465991	-1.60437	-2.74692	7.13652e-20
rs190264167	0.00059105389456	0.619440925319601	0.951780697898529	-1.3334	0.00029662828441	-0.754925	0.965894396325297	-1.41391	-2.7473	7.13376e-20
rs148482902	0.00012610616209	1.36867414089424	0.989306396683898	-1.34244	6.71583528004e-05	-1.42873	0.992069045303639	-1.40595	-2.74838	7.12608e-20
rs147934499	0.00011945615616	1.35682916117699	0.989864591222402	-1.3847	6.12769577616e-05	1.48400094021942	0.992758569369961	-1.37081	-2.75551	7.07547e-20
rs563165381	0.00020219986809	1.11700668790481	0.982963699508308	-1.42298	0.00010762	-1.31018	0.987351247317636	-1.33767	-2.76065	7.03919e-20
rs118075914	0.00070653892864	0.407888400650093	0.942897202309946	-1.35301	0.00039456657769	-0.541133	0.955138856180312	-1.41225	-2.76526	7.0068e-20
rs182777482	0.000658641	0.726211814214464	0.946561475047871	-1.21501	0.00035274849856	-0.333609	0.959701856113538	-1.55232	-2.76733	6.99232e-20
rs189118610	0.00038207739024	-0.0447967	0.968288763627051	-1.72457	0.00019489835236	1.31911952208358	0.977325846287884	-1.04295	-2.76752	6.99096e-20
rs59078959	1.31534606329e-05	-1.87646	0.998873820534726	-1.6359	7.0710255396e-06	-2.19288	0.99915899119779	-1.13811	-2.77401	6.94578e-20
rs75261292	0.000126248	1.35566927732289	0.989294523317479	-1.35942	6.54584556096e-05	1.42751376899726	0.992268239729149	-1.42019	-2.77961	6.907e-20
rs182414262	0.00046850169601	0.216731886033199	0.961392742629947	-1.60458	0.00025210453284	1.09710413281437	0.970864478202802	-1.18361	-2.78819	6.84796e-20
rs185124835	0.00013119869764	1.17844109584257	0.988879360040409	-1.56284	6.90763778884e-05	1.53973784835439	0.99184438659576	-1.2288	-2.79163	6.82444e-20
rs73911662	1.31641980625e-05	-1.86936	0.998872902248361	-1.64877	7.0762384144e-06	-2.19041	0.999158371714265	-1.14316	-2.79193	6.82242e-20
rs188074445	0.00070533798724	-0.461059	0.942988729390462	-1.33202	0.00040156953664	-0.417652	0.954378963106572	-1.46046	-2.79248	6.81866e-20
rs4809720	1.3155129e-05	-1.87237	0.998873677852538	-1.6435	7.0728870601e-06	-2.18657	0.99915876997979	-1.15179	-2.79529	6.79955e-20
rs12106159	4.9334184769e-06	1.82878985021138	0.999577310665596	-2.21291	2.6118438544e-06	2.62863524985768	0.999689189458535	-0.584376	-2.79728	6.78599e-20
rs73911653	1.315367824e-05	-1.86821	0.998873801924517	-1.65132	7.0706532649e-06	-2.18919	0.999159035437909	-1.14621	-2.79753	6.78433e-20
rs373289067	0.00058895523856	0.430934878277925	0.951943682415729	-1.4293	0.00029529672964	-0.815767	0.966042296387746	-1.36988	-2.79918	6.77312e-20
rs138966922	0.000656128	0.675904743314464	0.946754484584042	-1.25016	0.00035123632569	-0.342503	0.95986767449723	-1.55149	-2.80165	6.75645e-20
rs113662024	9.50018646721e-05	0.675725282628613	0.991922687282831	-2.18289	5.12590130116e-05	1.97095064766731	0.993935264377146	-0.622089	-2.80498	6.73397e-20
rs139037316	0.00054338407236	0.603120468799602	0.955496619339659	-1.38231	0.00030576719044	-0.717063	0.964880529446745	-1.42644	-2.80875	6.70861e-20
rs183724402	0.00015694827841	1.34028049393753	0.986725750922367	-1.27471	8.43811262464e-05	1.24790984463178	0.990055376653165	-1.53447	-2.80918	6.70576e-20
rs146961189	4.11819959824e-05	0.0628760915771693	0.996482500759612	-2.82303	2.164947841e-05	2.4501923531561	0.997429526136776	0.0121729303808009	-2.81086	6.69448e-20
rs73911658	1.31504868496e-05	-1.86929	0.998874074858895	-1.64942	7.0686325161e-06	-2.18159	0.999159275578297	-1.16297	-2.81238	6.68428e-20
rs6095297	0.00034922265625	1.17639598662207	0.970936352535793	-1.09729	0.00018293644516	0.642286364913422	0.978687816250006	-1.72237	-2.81966	6.63583e-20
rs237708	5.6662089444e-06	-2.1252	0.999514556542093	-1.55809	3.0205397209e-06	-2.32589	0.999640571955507	-1.2616	-2.81968	6.63567e-20
rs117278703	0.00076910819584	-0.427245	0.938153077921416	-1.30592	0.00042648032196	0.0084077592802425	0.951685659351977	-1.51498	-2.8209	6.62759e-20
rs576178287	0.00029912740209	-0.994392	0.975001248753408	-1.36242	0.00015219663424	-1.05205	0.98220529253549	-1.47087	-2.83329	6.54599e-20
rs139735573	0.00059740158724	0.427480791103765	0.951288066852011	-1.424	0.00030116825764	-0.749553	0.965390467177517	-1.41062	-2.83462	6.53731e-20
rs189820231	0.00017041213764	1.75641555974322	0.985603409051004	-0.600091	9.22742754025e-05	-0.225855	0.989135247038677	-2.23589	-2.83598	6.52842e-20
rs76535532	0.00025478863641	1.36905545009742	0.978628	-1.0057	0.00014219847009	-0.660518	0.983354811960531	-1.83331	-2.83901	6.50869e-20
rs145274028	5.09514722809e-05	0.393291986724628	0.995651683831961	-2.64198	2.69149289616e-05	2.31428152877046	0.996806348172095	-0.203898	-2.84588	6.46411e-20
rs79286473	4.74631434225e-05	-0.313433	0.995948179627688	-2.70537	2.46747647169e-05	2.35694139957362	0.997071381470751	-0.14716	-2.85253	6.42123e-20
rs183986772	0.00012393255625	1.23913766000449	0.989488777614079	-1.51799	6.51358756624e-05	1.48623164343029	0.992306048767414	-1.33772	-2.85571	6.40086e-20
rs143077651	0.00016278442569	1.28283445805607	0.986238938340085	-1.33145	8.38253775844e-05	1.25845109342677	0.990120226563433	-1.52461	-2.85605	6.39866e-20
rs143570842	0.00019113615504	-0.524424	0.983880844148037	-1.92858	0.000107578	-1.59538	0.987356062285357	-0.928758	-2.85734	6.39045e-20
rs147381218	0.00013229830441	0.346743638118257	0.98878720045819	-2.18591	7.00940677284e-05	1.86552670617829	0.991725225668717	-0.671576	-2.85748	6.38952e-20
rs80019807	0.00033609522241	-0.329016	0.971998275562874	-1.73513	0.00017959216144	-1.28558	0.97906927207537	-1.12421	-2.85934	6.37765e-20
rs184322047	0.00072728920489	-0.355361	0.941318567049451	-1.35838	0.00041044328836	0.253303651638252	0.953417804799647	-1.50268	-2.86106	6.3667e-20
rs187466416	0.00027115879561	0.454116439645592	0.977285555509229	-1.79161	0.00014272125156	1.40929636884134	0.983294639518244	-1.06954	-2.86115	6.36612e-20
rs61597665	0.00065593356544	0.11075662210283	0.946769440543658	-1.46075	0.00032915756329	-0.70145	0.962295279265495	-1.40224	-2.863	6.35438e-20
rs531959487	0.00037603415056	-0.215238	0.968774672054245	-1.71082	0.00018309607969	1.25106235173265	0.978669615442382	-1.15793	-2.86875	6.31795e-20
rs529669244	0.00045125655184	-0.640914	0.962760922092397	-1.44746	0.00025235228736	-0.84146	0.970836680435882	-1.42372	-2.87118	6.3026e-20
rs192541473	0.00046986631696	0.0549897584469746	0.961284643593627	-1.62431	0.00025579843969	-1.025	0.970450191174348	-1.25105	-2.87535	6.27637e-20
rs6125498	5.2523014041e-06	2.64144184240266	0.999550001456313	-0.366095	2.77955584e-06	1.7301523512476	0.999669238261428	-2.51084	-2.87693	6.26645e-20
rs6019766	1.129766544e-05	-0.7652	0.999032557203427	-3.17794	5.9968173456e-06	2.80131817513598	0.999286663499365	0.298114197382385	-2.87983	6.24832e-20
rs16994651	8.79855256036e-05	2.04950714600973	0.992514769904592	-0.362893	4.36829786761e-05	0.470767750340051	0.994826989756979	-2.52191	-2.88481	6.21731e-20
rs143830265	0.00017709754084	-0.955244	0.985047064643171	-1.652	9.511515729e-05	-1.43046	0.988804494777276	-1.23447	-2.88647	6.20694e-20
rs55822943	8.67559982041e-05	1.89710648906143	0.992618597917287	-0.668172	4.68766162225e-05	0.869839994741954	0.994450892590769	-2.22085	-2.88902	6.19116e-20
rs6019493	4.0631674329e-06	1.85647879428296	0.999651846764562	-2.25878	2.1483937476e-06	2.64692919617395	0.999744326119865	-0.633582	-2.89236	6.17052e-20
rs79921872	0.00070225	-0.35498	0.943224155083335	-1.37489	0.00038072204641	-0.310268	0.956644696677858	-1.52312	-2.89801	6.13575e-20
rs185512917	5.87171245441e-05	-2.17661	0.994992263976074	-0.291441	3.15296849169e-05	-0.611842	0.996260821335197	-2.60797	-2.89941	6.12716e-20
rs6095196	0.00073015065369	-0.68896	0.941101288968565	-1.19261	0.00028514712769	0.0129840758484689	0.967171135408363	-1.70814	-2.90076	6.11893e-20
rs114770726	9.36902035969e-05	2.04772624664622	0.992033319765245	-0.336355	4.71834357604e-05	0.228833225117994	0.994414775109483	-2.56778	-2.90413	6.09829e-20
rs141766039	0.000670965	0.546759062656835	0.945615912400988	-1.3145	0.00034853902864	0.191275469757676	0.960163590813306	-1.59392	-2.90842	6.07221e-20
rs55953372	5.0470767649e-06	1.6760439247386	0.999567576771788	-2.4691	2.6757107776e-06	2.67649288404167	0.999681591687183	-0.445421	-2.91452	6.03528e-20
rs73261365	1.09981109956e-05	-1.50379	0.999058184520075	-2.35423	5.87286756e-06	-2.47941	0.999301397337706	-0.561627	-2.91585	6.02724e-20
rs193144519	0.00021461664004	1.07669046676405	0.981936425028816	-1.43777	0.00011518440976	-1.16719	0.98647419982687	-1.47963	-2.9174	6.01794e-20
rs138468239	0.00043274400625	-0.656387	0.964233994103027	-1.45766	0.00024083625721	-0.824408	0.972130450360824	-1.45976	-2.91742	6.01782e-20
rs182899650	0.00010478593225	-1.94931	0.991098224777962	-0.477762	5.62213536481e-05	0.36277238603431	0.993352045735142	-2.44136	-2.91912	6.00758e-20
rs560934598	0.00068555996224	-0.325902	0.94449862769976	-1.39552	0.00039239251921	-0.252368	0.955375010093674	-1.52431	-2.91982	6.00337e-20
rs186034661	0.00014362344649	1.73709770282787	0.987839023019342	-0.714355	7.87995311481e-05	-0.519058	0.990707074992324	-2.20579	-2.92015	6.00142e-20
rs147884018	6.54629864464e-05	-1.79041	0.994420148086915	-1.00045	3.51670348324e-05	1.28324772603867	0.995831257785199	-1.92014	-2.92059	5.99877e-20
rs6095216	3.1008744649e-06	0.106857739944234	0.999734279101532	-4.11082	1.6452423289e-06	3.30381937676877	0.999804192932694	1.18735	-2.92347	5.9815e-20
rs6012642	1.480171729e-05	-0.895935	0.998732878102978	-2.93466	7.8350727744e-06	2.64651033181857	0.999068202145989	0.00954797341487179	-2.92511	5.97168e-20
rs535677465	0.00067057174116	-0.358493	0.945646086220099	-1.39535	0.00038698364961	-0.23794	0.955963047601329	-1.5343	-2.92966	5.94463e-20
rs185175692	0.00012275532025	-0.995704	0.989587584130794	-1.79183	6.74466345081e-05	1.60508438872512	0.992035272304147	-1.13848	-2.9303	5.94077e-20
rs376921169	0.00030317077924	-0.978986	0.974671893336374	-1.37085	0.00015385425444	-0.956247	0.982014970557099	-1.56013	-2.93098	5.93677e-20
rs4810896	3.3148756624e-06	-1.97481	0.999715946067252	-2.1338	1.7647262649e-06	-2.62058	0.999789975643848	-0.801139	-2.93494	5.91331e-20
rs73132159	8.74518614649e-05	1.8342909265503	0.992559832752839	-0.780636	4.735779489e-05	0.937897612508537	0.994394251468906	-2.15462	-2.93526	5.91142e-20
rs186240834	0.00064764651121	-0.391042	0.947406584774724	-1.40015	0.00037348654564	-0.291928	0.9574335775959	-1.53755	-2.93769	5.89703e-20
rs143003731	0.00010613326441	1.57663971423302	0.990984798074361	-1.12273	5.51153305609e-05	1.18804089994976	0.993481976175435	-1.81547	-2.9382	5.89404e-20
rs138111886	0.00016983563041	1.52020012123909	0.985651414136606	-0.983128	9.112038849e-05	0.790850330515311	0.989269652571413	-1.95797	-2.9411	5.87698e-20
rs187257454	9.38280885201e-05	-1.28282	0.992021688655541	-1.59927	4.956441604e-05	1.5694724581688	0.994134585462296	-1.34494	-2.94421	5.85872e-20
rs184220064	0.000336466	1.08662159952025	0.971968278641584	-1.21339	0.00018094285225	0.6372226145783	0.978915173735358	-1.73086	-2.94424	5.85855e-20
rs187193013	0.00064436268649	-0.338332	0.947659296584597	-1.42075	0.00036990444241	-0.350282	0.957824613179297	-1.5242	-2.94495	5.8544e-20
rs6125643	3.0964033156e-06	-1.72313	0.999734662142697	-2.63305	1.6441137729e-06	-2.8129	0.999804327220511	-0.314093	-2.94714	5.84156e-20
rs373194550	0.00066126636801	-0.323644	0.946359884816125	-1.41317	0.00037764537561	-0.28547	0.956979984737236	-1.53405	-2.94722	5.84114e-20
rs192967050	0.00065580039396	-0.327202	0.946779672562396	-1.41598	0.00037508456241	-0.301699	0.957259235169341	-1.53274	-2.94871	5.83242e-20
rs570045554	0.00040091251984	-0.166793	0.966777441790874	-1.68882	0.00019567253689	1.13339719622828	0.977237829061696	-1.26365	-2.95247	5.81055e-20
rs79067068	5.76325423921e-05	0.360736391885252	0.995084308716955	-2.59292	3.09290587321e-05	2.21505774635478	0.996331789706007	-0.359784	-2.9527	5.8092e-20
rs547937535	0.00065139290176	-0.30417	0.947118440042465	-1.42604	0.00037340538169	-0.326602	0.957442434216386	-1.52738	-2.95342	5.80501e-20
rs76619987	0.00064336800609	-0.353544	0.94773587035822	-1.41649	0.00037189194025	-0.294375	0.957607611156577	-1.5389	-2.95539	5.79357e-20
rs117355319	0.00013856821225	-0.400942	0.988262038751876	-2.14303	7.11358983241e-05	-1.78267	0.991603267764871	-0.814345	-2.95737	5.78211e-20
rs6019495	4.0675629124e-06	1.86478714015133	0.999651470268373	-2.24278	2.1510328896e-06	2.61557028309606	0.999744012123911	-0.715462	-2.95825	5.77707e-20
rs190531251	0.00064394645121	-0.350146	0.94769133824187	-1.4172	0.00037212339025	-0.27879	0.957582347021179	-1.54288	-2.96008	5.76646e-20
rs1467417	3.3137469369e-06	-1.98939	0.999716042761037	-2.10508	1.7641418041e-06	-2.59977	0.999790045187343	-0.855618	-2.96069	5.76295e-20
rs562708331	0.00064255152196	-0.291932	0.947798735244591	-1.43594	0.00037110940164	-0.341347	0.957693039744821	-1.52561	-2.96154	5.75805e-20
rs117516180	0.00014379127569	-1.32835	0.987824985490765	-1.33267	7.82182816921e-05	-1.20047	0.990774990100019	-1.629	-2.96167	5.7573e-20
rs544947123	0.00064382465169	-0.314854	0.947700714739327	-1.42841	0.00037217740561	-0.308716	0.957576451117254	-1.53439	-2.96281	5.75078e-20
rs572512490	0.00046884807841	0.243524885812062	0.961365301496645	-1.5983	0.00025219345636	0.907301991108648	0.970854500904887	-1.36813	-2.96642	5.73004e-20
rs531710094	0.00065651250625	-0.3008	0.94672496111832	-1.42331	0.00037918993984	-0.226953	0.956811632532314	-1.54645	-2.96976	5.71091e-20
rs188191279	5.09801712016e-05	-1.90279	0.99564924525588	-0.916273	2.74048062016e-05	1.27389512049758	0.996748409685956	-2.05554	-2.97181	5.69922e-20
rs6067085	3.2133430564e-06	-1.91615	0.99972464406908	-2.26342	1.7089025625e-06	-2.66071	0.999796618006955	-0.71125	-2.97467	5.68299e-20
rs73272000	1.12552869121e-05	-0.779215	0.999036182668034	-3.16901	5.9741625241e-06	2.76396463478997	0.999289356432266	0.1923659877069	-2.97664	5.67176e-20
rs8115055	8.76125952256e-05	2.01244423172253	0.992546259888658	-0.439647	4.34989054369e-05	0.442081338878638	0.99484867572309	-2.53704	-2.97668	5.67153e-20
rs78573470	0.00022872630169	-0.736143	0.980771696164896	-1.70994	0.00012362326596	-1.31295	0.985497618465268	-1.2673	-2.97724	5.66837e-20
rs188728835	0.00067789933225	-0.174654	0.945084757119021	-1.43657	0.00039188953444	-0.142923	0.955429662711264	-1.54559	-2.98215	5.6406e-20
rs184624955	0.00044561099025	-0.969521	0.963209670977148	-1.19857	0.00024074935921	-0.0462865	0.972140226036317	-1.78924	-2.98781	5.60878e-20
rs6095570	0.000466301	0.606710197277022	0.961567135937424	-1.45245	0.00022540217956	-0.758756	0.973869811111066	-1.542	-2.99444	5.57169e-20
rs56945685	8.78658767424e-05	2.00135912469809	0.992524872754262	-0.460338	4.36147972225e-05	0.445189767040422	0.994835022214094	-2.53434	-2.99468	5.57037e-20
rs6019516	3.3111261225e-06	-2.02758	0.999716267276693	-2.02878	1.7625483121e-06	-2.55709	0.999790234792926	-0.966089	-2.99487	5.56934e-20
rs6095357	3.3073787044e-06	-2.05337	0.999716588304574	-1.97674	1.7603717041e-06	-2.53629	0.999790493782123	-1.01968	-2.99641	5.56072e-20
rs16994682	0.00045578834064	0.614327468944972	0.962401006113355	-1.45878	0.00022049577081	-0.777919	0.97442404893136	-1.53821	-2.997	5.55749e-20
rs148992383	3.35858498089e-05	-1.77191	0.997129451892656	-1.3613	1.79329381729e-05	-1.69809	0.997869856362023	-1.6371	-2.9984	5.54971e-20
rs189500106	0.00013708194724	-1.77757	0.988386476489217	-0.666255	7.46259282769e-05	0.256515211324018	0.991194939245344	-2.3336	-2.99986	5.54161e-20
rs572707523	0.00038746772964	-0.139005	0.967855762937804	-1.70941	0.00019011997456	1.1210292709814	0.977869452338805	-1.29095	-3.00036	5.53882e-20
rs80350619	0.00065352320881	-0.379426	0.946954670690207	-1.40014	0.000356303	-0.0290876	0.959312269074144	-1.60051	-3.00065	5.53723e-20
rs6019519	3.3143294809e-06	-2.02069	0.999715992856621	-2.04225	1.7643543241e-06	-2.55788	0.999790019900131	-0.963554	-3.0058	5.50876e-20
rs559151767	0.00039701359504	-0.900498	0.967089902317098	-1.31488	0.00021450824521	-0.564025	0.975101267149144	-1.69137	-3.00625	5.5063e-20
rs191713676	0.00066523242241	-0.187831	0.946055524126458	-1.44321	0.00038396794401	0.0170855979300948	0.956291221284376	-1.56496	-3.00817	5.49571e-20
rs191630535	5.20845116416e-05	2.21966035560679	0.995555417413687	-0.255538	2.790163684e-05	0.449271137026239	0.996689655690304	-2.75476	-3.0103	5.48404e-20
rs6067048	3.1126486329e-06	2.80158932589683	0.999733270415746	-0.191233	1.6541560996e-06	1.70018815992038	0.999803132276971	-2.82145	-3.01269	5.47097e-20
rs6095571	0.00045906919081	0.614004545900056	0.962140607927313	-1.45557	0.00022225144561	-0.732716	0.974225651902231	-1.56767	-3.02324	5.41352e-20
rs111626873	0.00010271011716	0.695138436642788	0.991273030481014	-2.13117	5.59001456896e-05	1.80433991739605	0.993389776247982	-0.892508	-3.02368	5.41118e-20
rs141090836	9.62877075169e-05	-1.9265	0.991814256396782	-0.562176	5.20788825649e-05	0.403770766444447	0.993838858753983	-2.46373	-3.02591	5.39911e-20
rs117367196	5.83422520041e-05	1.44790467923767	0.995024076187948	-1.60857	3.17021924209e-05	1.66095903183926	0.99624044018241	-1.41752	-3.02609	5.39811e-20
rs543734174	0.000240591	-0.555657	0.979794411790468	-1.79964	0.00012898599184	-1.32787	0.984878024528651	-1.22751	-3.02715	5.39239e-20
rs139782522	0.00016606445956	1.65663557493831	0.985965550522245	-0.780158	8.98271763984e-05	-0.215891	0.98942033021079	-2.25135	-3.03151	5.36895e-20
rs186144822	0.00017353583289	-0.570407	0.985343383872623	-1.95113	9.24476481009e-05	1.54265691936636	0.989115055624678	-1.08324	-3.03438	5.35358e-20
rs115824981	2.83989870649e-05	1.42381503714532	0.997571691219346	-1.99912	1.49332782096e-05	2.06668633357141	0.998225535292971	-1.03532	-3.03444	5.35325e-20
rs117810008	0.00014743059241	-0.691063	0.987520684753452	-1.95604	8.18359055424e-05	1.58370475508273	0.990352446277599	-1.07856	-3.0346	5.35238e-20
rs6095577	0.00038230025625	0.968029663725866	0.96827085334055	-1.27159	0.00018450332224	-0.548435	0.978509197290065	-1.77291	-3.04449	5.2997e-20
rs141038430	0.00034160280625	0.636077370485595	0.971552465554985	-1.5833	0.00016596395929	1.0188236937909	0.980626812350647	-1.46299	-3.04629	5.29018e-20
rs190179205	6.40728207025e-05	1.9549631147285	0.994537994080001	-0.704467	3.500970561e-05	0.896665483614731	0.995849830378063	-2.34197	-3.04643	5.28942e-20
rs6012549	4.0707501121e-06	1.83738185278622	0.99965119726795	-2.2931	2.15267584e-06	2.6004225736096	0.999743816651475	-0.754576	-3.04768	5.28283e-20
rs556400684	0.00020495071921	1.29610718002808	0.982735928552541	-1.20412	0.00010959577344	-0.820482	0.987122007292924	-1.84386	-3.04798	5.28128e-20
rs79113581	0.00062662104976	-0.332905	0.949026966856785	-1.43564	0.00034625022084	-0.0644805	0.960414835538685	-1.61265	-3.04829	5.27959e-20
rs12165259	0.00038683809124	0.5820868203496	0.967906321197588	-1.55557	0.00018928806724	-0.919444	0.977964155024777	-1.49417	-3.04974	5.27196e-20
rs143923594	0.00060858916416	-0.402198	0.950421062894972	-1.42522	0.000336356	-0.0888719	0.961502492554946	-1.62478	-3.05001	5.27056e-20
rs4810894	3.3144387136e-06	-1.97131	0.999715983499056	-2.14076	1.7644871556e-06	-2.57599	0.99979000409485	-0.917047	-3.0578	5.22962e-20
rs511073	5.9955440164e-06	-3.0584	0.999486355775125	0.8875043350328	3.1271678244e-06	0.0398672231081555	0.999627888503857	-3.94736	-3.05986	5.21888e-20
rs6095568	0.00050645252025	0.6125574885023	0.958395487197135	-1.40997	0.00023790594564	-0.546199	0.972460207130764	-1.651	-3.06097	5.2131e-20
rs8115597	0.00037623585024	0.968020498226512	0.96875844646673	-1.27911	0.00018064166409	-0.549783	0.978949531649746	-1.78247	-3.06158	5.20993e-20
rs143824664	2.84036768401e-05	1.41165322890847	0.997571291185232	-2.01624	1.49355969156e-05	2.06172599918233	0.998225260258929	-1.04547	-3.0617	5.20928e-20
rs182570829	0.00018551257209	1.15505532183579	0.984347676639386	-1.42193	9.81748052224e-05	-1.0903	0.9884485197944	-1.64296	-3.0649	5.19266e-20
rs76718800	0.00062161459684	-0.299978	0.949413619595898	-1.44932	0.00034413218064	-0.0517223	0.960647452098402	-1.61631	-3.06563	5.18885e-20
rs6019891	0.00035721756004	1.08910487719707	0.970290753548802	-1.18269	0.00016387584196	-0.437676	0.980865897076138	-1.88419	-3.06689	5.18233e-20
rs78865809	3.25117776481e-05	2.21901082268924	0.997220996625627	-0.487669	1.72501500889e-05	1.01399840609824	0.997950794367795	-2.58211	-3.06978	5.16738e-20
rs75380191	0.00048187713289	0.541712031414424	0.96033424917411	-1.47273	0.00023459517225	-0.645027	0.972833047685113	-1.6005	-3.07323	5.14959e-20
rs75886438	0.00061889000625	-0.27703	0.949624174526448	-1.45768	0.00034138105225	-0.088763	0.960949766693175	-1.61767	-3.07535	5.13866e-20
rs187971269	0.00015106622281	1.6729694326697	0.987216879385155	-0.79829	8.11972199025e-05	-0.29845	0.990427019505953	-2.2803	-3.07859	5.12206e-20
rs117635294	0.00054276418729	-0.19802	0.955545131261423	-1.53791	0.00028307053009	0.591459580259975	0.967402419828414	-1.54255	-3.08045	5.1125e-20
rs143458892	4.31747555625e-05	1.80238176768253	0.996312919722032	-1.18316	2.31902922969e-05	1.4510126400907	0.997247086703313	-1.89773	-3.08089	5.11029e-20
rs3795092	5.2784603001e-06	2.60560002437443	0.999547761268501	-0.45761	2.7945474561e-06	1.66221608073267	0.999667454881524	-2.62335	-3.08096	5.10994e-20
rs6095359	3.3109805521e-06	-2.01462	0.999716279747184	-2.05498	1.7624421049e-06	-2.53262	0.999790247430254	-1.02838	-3.08336	5.09765e-20
rs118093162	7.58050576921e-05	1.35407466281366	0.993544314437519	-1.61056	3.91792120489e-05	-1.56124	0.995357857358384	-1.47321	-3.08376	5.0956e-20
rs369841021	0.00030711160516	-0.85259	0.974351105332147	-1.47749	0.00015503238144	-0.901455	0.981879747093936	-1.60641	-3.08391	5.09487e-20
rs6067046	3.1112020996e-06	2.76882519020784	0.999733394339261	-0.282695	1.6532559241e-06	1.71185807946865	0.999803239389373	-2.80182	-3.08452	5.09178e-20
rs6066909	3.31058025e-06	-2.01604	0.999716314039622	-2.05219	1.7622031504e-06	-2.52991	0.999790275862853	-1.0353	-3.08749	5.07664e-20
rs78401579	3.74692118641e-05	0.765995611978677	0.996798607488547	-2.57965	1.99660623556e-05	2.24324917083302	0.997628926641166	-0.512089	-3.09174	5.05514e-20
rs145864261	2.8430224e-05	1.3971736684171	0.997569026739547	-2.03606	1.49497449201e-05	2.05590082995171	0.998223582092207	-1.05697	-3.09303	5.04863e-20
rs557050086	0.00015463917316	0.682164626791257	0.986918493837084	-1.93865	8.28220124356e-05	1.52664751787233	0.990237330035928	-1.16065	-3.09929	5.01709e-20
rs559044316	0.00023091537681	-0.686165	0.980591239244326	-1.74017	0.00012340099396	-1.23954	0.985523315959333	-1.36049	-3.10067	5.0102e-20
rs115794147	2.83800187441e-05	1.43412316581226	0.997573309205375	-1.98475	1.48755233344e-05	2.0271696293377	0.998232385954569	-1.11799	-3.10274	4.99982e-20
rs6012683	0.00042737706361	0.270955492886892	0.964661893287978	-1.63599	0.00019099792804	0.943980550209114	0.977769527739161	-1.4675	-3.10349	4.9961e-20
rs140529740	5.54097118129e-05	2.14473311238794	0.995273005896931	-0.388165	2.99900807424e-05	-0.454813	0.996442757074949	-2.71633	-3.10449	4.99108e-20
rs3935549	3.09302569e-06	0.160716438278274	0.999734951502418	-4.10489	1.6408072836e-06	3.24703733195934	0.999804720662631	1.00005651543253	-3.10483	4.98938e-20
rs1997851	3.3075241956e-06	-2.02914	0.99971657584086	-2.02616	1.7604247761e-06	-2.51258	0.999790487467215	-1.07951	-3.10566	4.98522e-20
rs137866204	0.00010960205481	1.42307361664326	0.990692893404673	-1.33534	5.69621901289e-05	1.21024123762973	0.993265034720575	-1.77281	-3.10816	4.97282e-20
rs151338185	0.00036267012721	-1.03946	0.969850943797819	-1.22685	0.00019479505761	-0.124174	0.977337591091812	-1.88599	-3.11284	4.94957e-20
rs13042686	1.12094388025e-05	-1.66701	0.999040104983477	-2.08621	5.9833073664e-06	-2.27885	0.999288269401575	-1.02917	-3.11539	4.93699e-20
rs535249	5.7029260864e-06	-3.05102	0.999511412396171	0.84007900421487	2.9856729681e-06	0.176325734557934	0.999644719438251	-3.95576	-3.11568	4.93553e-20
rs62210075	6.54455112256e-05	-1.15147	0.994421629308706	-1.93518	3.61090424464e-05	-1.76233	0.995720069005912	-1.18065	-3.11583	4.93481e-20
rs147145199	0.00017806767364	1.54597503035026	0.98496638452562	-0.921679	9.55953997441e-05	-0.307281	0.988748603967824	-2.19695	-3.11863	4.921e-20
rs537392519	0.00052653268369	0.624113691531968	0.956817156869541	-1.38481	0.00026678322225	0.0312617626350752	0.969220288500535	-1.73998	-3.12478	4.89082e-20
rs181638873	0.00051352998544	0.348979753940656	0.957838594172548	-1.5248	0.00027561976324	0.506620366466287	0.968233172287191	-1.60041	-3.12521	4.88873e-20
rs6019888	0.00034632093409	0.919370005964631	0.971170882957905	-1.36275	0.00015948658944	-0.679057	0.98136883687042	-1.7652	-3.12794	4.87539e-20
rs6122779	3.1023890496e-06	2.75620543216605	0.999734149347871	-0.318964	1.6486046404e-06	1.70582096294335	0.999803792848665	-2.81354	-3.13251	4.85319e-20
rs6012555	3.3072332164e-06	-2.02186	0.999716600768014	-2.04094	1.7603451684e-06	-2.50634	0.999790496939541	-1.09518	-3.13612	4.83569e-20
rs75392729	0.00010255207824	1.88299364063673	0.99128634156458	-0.614047	5.42928764569e-05	0.0262861392682506	0.993578616289794	-2.52372	-3.13776	4.82774e-20
rs111976186	0.00030452693049	-0.82905	0.974561477146861	-1.50083	0.00015568551076	-0.863505	0.981804798037945	-1.63726	-3.13809	4.82618e-20
rs548116784	0.00051871884516	-0.102342	0.957430717786235	-1.5733	0.00027818236944	0.562951171547114	0.967947283534272	-1.56681	-3.14011	4.81645e-20
rs74887838	0.00014700350025	1.48453132087921	0.987556386268485	-1.10507	7.81379977849e-05	0.785807454435001	0.990784371468997	-2.03753	-3.14259	4.80448e-20
rs192248238	0.00051377928889	0.0694476919886882	0.957818989436133	-1.58058	0.00027486987264	0.573025839606254	0.968316863314178	-1.56701	-3.14759	4.78053e-20
rs1079661	3.10252996e-06	2.7467923242875	0.999734137276154	-0.344834	1.6486303201e-06	1.71210056153085	0.999803789793019	-2.80281	-3.14764	4.7803e-20
rs6063382	3.1024947321e-06	2.75857135557713	0.999734140294109	-0.312425	1.6487073604e-06	1.69198299091914	0.999803780625939	-2.83702	-3.14944	4.7717e-20
rs189038636	0.000521437	-0.0550125	0.957217174990548	-1.57436	0.00028588722724	-0.512829	0.967088732351115	-1.5798	-3.15416	4.74922e-20
rs139317806	0.00051700300129	-0.0350588	0.957565555252831	-1.57931	0.00027662009761	0.549399647665029	0.968121553172914	-1.5768	-3.15611	4.73997e-20
rs182690371	0.00029321767696	1.17062416781518	0.975483029140005	-1.18581	0.00015862898704	0.206613046654175	0.981467164950657	-1.97316	-3.15897	4.72644e-20
rs78040508	0.00034146604944	0.939941987574951	0.971563530349891	-1.35086	0.00015822872521	-0.615144	0.981513063564544	-1.80964	-3.1605	4.71922e-20
rs6067030	3.1023185956e-06	2.74496122270544	0.999734155383627	-0.349895	1.6485789609e-06	1.70545261960949	0.999803795904288	-2.81418	-3.16407	4.70238e-20
rs139644122	5.71631259969e-05	1.95735011500364	0.995124151745514	-0.755461	3.12326735044e-05	0.881779401712766	0.996295914139351	-2.41183	-3.16729	4.68727e-20
rs572096483	0.00042251213601	-0.550019	0.965050095769016	-1.53095	0.00022728276081	-0.604904	0.973657543968922	-1.64015	-3.1711	4.66947e-20
rs79958301	0.00054366849889	0.520163659523003	0.955474361898194	-1.42658	0.000253765	-0.203119	0.970678217359493	-1.74469	-3.17127	4.66865e-20
rs143953003	0.00017069161201	-0.629632	0.98558013922853	-1.92421	9.48824053776e-05	1.42065916827845	0.98883158481155	-1.24947	-3.17368	4.65742e-20
rs78266477	0.000341695	0.9314687584528	0.971544988230835	-1.35824	0.00015831678976	-0.604049	0.98150296470447	-1.81601	-3.17425	4.65476e-20
rs509703	5.6991535441e-06	-3.03178	0.999511735443918	0.781264156549365	2.9824944601e-06	0.179877706298241	0.99964509753101	-3.95566	-3.1744	4.65409e-20
rs548572219	0.00034224630001	0.140687787501554	0.971500404792085	-1.76932	0.00018029775625	-1.03528	0.97898876574319	-1.40671	-3.17603	4.64651e-20
rs7273568	4.9826275524e-06	1.67571611608383	0.999573096291363	-2.47606	2.6392276849e-06	2.5820740257422	0.999685931794384	-0.700444	-3.17651	4.64428e-20
rs6125610	3.1031993281e-06	2.74737595013596	0.999734079931759	-0.343124	1.6491439561e-06	1.69363567696369	0.999803728675106	-2.83409	-3.17721	4.64101e-20
rs80207904	0.00034166195281	0.931460011577518	0.971547680170776	-1.3583	0.00015830169124	-0.597993	0.981504696122401	-1.81963	-3.17793	4.6377e-20
rs6095575	0.00034214640784	0.930308370996691	0.971508486031548	-1.35867	0.000158584	-0.596785	0.981472363714932	-1.81947	-3.17814	4.63672e-20
rs78796217	0.000341732	0.931824083089906	0.97154199705023	-1.35787	0.00015834195556	-0.595026	0.981500078838016	-1.82124	-3.17911	4.6322e-20
rs6125603	3.1028470201e-06	2.75406048288665	0.99973411011379	-0.324798	1.6487330409e-06	1.68165852822753	0.999803777570198	-2.85442	-3.17922	4.6317e-20
rs75377371	0.00033621989769	0.971144669317147	0.971988179227368	-1.32921	0.00015580781329	-0.55575	0.981790764632643	-1.8513	-3.18051	4.62573e-20
rs6122781	3.1031993281e-06	2.74450922178259	0.999734079931759	-0.350993	1.6491439561e-06	1.6934176406918	0.999803728675106	-2.83446	-3.18545	4.60293e-20
rs151224954	6.12223307809e-05	-1.55871	0.994779720854009	-1.41915	3.28904544004e-05	1.42196365487827	0.996100073874992	-1.76635	-3.1855	4.60269e-20
rs143095201	0.00023924974329	-0.34942	0.9799048010634	-1.89382	0.00012722486436	-1.28268	0.985081414202852	-1.29221	-3.18602	4.60029e-20
rs6125612	3.1029527104e-06	2.74463531495527	0.99973410105936	-0.350687	1.6490155396e-06	1.69289174077593	0.999803743955476	-2.83539	-3.18607	4.60007e-20
rs141608463	0.00017249932921	1.52934010461478	0.985429650143073	-0.961982	9.12468173824e-05	0.290751356738468	0.989254924266209	-2.22484	-3.18682	4.59662e-20
rs6063378	3.1024595044e-06	2.73096095107245	0.999734143312047	-0.388194	1.6487073604e-06	1.71414775470787	0.999803780625939	-2.79928	-3.18747	4.59364e-20
rs182068986	0.00028466100961	0.505381136682887	0.976181441405215	-1.74398	0.00014480993569	-1.10002	0.983054304263451	-1.4441	-3.18808	4.59082e-20
rs10485611	1.11919018849e-05	-1.61543	0.999041605278619	-2.17157	5.97558025e-06	-2.28421	0.999289187909624	-1.0176	-3.18917	4.58583e-20
rs6012687	0.00034513836841	0.875394958525991	0.971266495810589	-1.4027	0.00015989349601	-0.637779	0.981322190042195	-1.79063	-3.19332	4.56683e-20
rs6063380	3.1029527104e-06	2.73698283300786	0.99973410105936	-0.371656	1.6489641744e-06	1.70091580226147	0.999803750067458	-2.82179	-3.19344	4.56629e-20
rs237468	3.49278721e-06	3.06860720209749	0.999700705269521	0.649725073685423	1.8440282025e-06	0.856739938878457	0.999780539799019	-3.84525	-3.19552	4.55679e-20
rs57492462	9.38042612676e-05	1.90036199337963	0.992023698554038	-0.624355	4.716667684e-05	0.197600396051137	0.994416747830044	-2.57458	-3.19893	4.54128e-20
rs6095265	0.00032613831649	0.631408747847369	0.972805274120543	-1.60845	0.00017147116809	0.862448166051914	0.979996808067732	-1.59146	-3.19991	4.53684e-20
rs187866152	0.00013045294656	0.895898998389017	0.988941872259045	-1.85542	6.921408025e-05	1.46034016467336	0.991828	-1.34595	-3.20137	4.53024e-20
rs237454	3.8615001049e-06	3.01958708850066	0.999669120948432	0.5505658042036	2.0394124864e-06	0.904088006274158	0.999757292504274	-3.75324	-3.20267	4.52433e-20
rs187773203	0.00027194648464	-0.626246	0.977221075358254	-1.69933	0.00014525793529	-1.04136	0.983002770315839	-1.50435	-3.20369	4.51975e-20
rs6066968	3.1892602225e-06	1.90187865722205	0.999726707197333	-2.29441	1.6964020516e-06	2.58454002426178	0.999798105432619	-0.914633	-3.20904	4.49562e-20
rs1354333	3.0901420944e-06	-1.54542	0.999735198538936	-2.92442	1.6404998724e-06	-2.82311	0.99980475724178	-0.286449	-3.21087	4.48739e-20
rs149539962	4.88367561889e-05	2.06790463529913	0.995831406255101	-0.610886	2.65617575161e-05	0.748108680762388	0.996848122445789	-2.60093	-3.21181	4.48317e-20
rs6125597	3.1082395204e-06	2.70357681705256	0.999733648141484	-0.461656	1.65173904e-06	1.74131652661064	0.999803419884338	-2.75143	-3.21308	4.47748e-20
rs541202259	0.00046697481216	0.136269065600474	0.96151372421564	-1.6198	0.00025200292516	0.599328487016996	0.97087587892577	-1.59373	-3.21353	4.47549e-20
rs6067034	3.1036221241e-06	2.74070079638533	0.999734043711063	-0.361368	1.6493751184e-06	1.68279502912138	0.999803701168942	-2.85231	-3.21368	4.4748e-20
rs41283548	3.78861177289e-05	-0.669798	0.996763102095541	-2.64298	2.066793444e-05	-2.20883	0.997545780255934	-0.571487	-3.21447	4.47128e-20
rs145115977	0.00014767839529	1.33581297367577	0.987499971582647	-1.30997	8.032102884e-05	0.922025841869184	0.990529342249966	-1.90874	-3.2187	4.45238e-20
rs148481842	0.000242986	1.0901077752117	0.979597407049116	-1.364	0.00012824656516	0.700777069388764	0.984963409452535	-1.85678	-3.22078	4.44313e-20
rs115923048	2.68216266816e-05	1.42242844123144	0.997706257015481	-2.02945	1.40591252025e-05	2.00364310383913	0.998329234026976	-1.1933	-3.22275	4.4344e-20
rs140504428	0.00023798307289	-0.586641	0.980009065102314	-1.7876	0.00012670654096	-1.16153	0.98514129050864	-1.44004	-3.22764	4.41277e-20
rs114488069	0.00033140017936	0.868822921930962	0.972378637829238	-1.42758	0.00017424792009	0.546792875919487	0.979679464796732	-1.80161	-3.22919	4.40594e-20
rs6125596	3.1083453025e-06	2.7024701511585	0.999733639079199	-0.464629	1.6517904484e-06	1.73323633307916	0.99980341376722	-2.76545	-3.23008	4.40204e-20
rs13043310	4.9555657321e-06	1.78509148245145	0.999575413921202	-2.2896	2.62375204e-06	2.48809729596246	0.99968777282178	-0.941542	-3.23114	4.39735e-20
rs138605948	0.00013443011136	1.18696957151728	0.988608579658716	-1.54102	7.17271792561e-05	-1.18454	0.991534065071579	-1.69022	-3.23125	4.39688e-20
rs2273146	3.1081337401e-06	2.69941406360785	0.999733657203616	-0.472915	1.6516876324e-06	1.73532112233306	0.99980342600136	-2.76186	-3.23478	4.38139e-20
rs6067037	3.1038687684e-06	2.72118539204668	0.999734022581186	-0.414609	1.6493751184e-06	1.69906095244028	0.999803701168942	-2.82482	-3.23942	4.36107e-20
rs116547338	2.78502119289e-05	1.35280530116555	0.997618503519618	-2.10715	1.453744384e-05	2.02489509022241	0.998272489532733	-1.13398	-3.24113	4.35364e-20
rs186650585	0.00030727285264	0.536605207311229	0.974337984088622	-1.69109	0.00016937460736	-0.909546	0.980236551398781	-1.5565	-3.24759	4.3256e-20
rs6095569	0.00047548419136	0.536453938437832	0.96083987717108	-1.48179	0.00022458619044	-0.34332	0.973961943173569	-1.7667	-3.24849	4.32172e-20
rs527699620	0.00033149849041	-0.465842	0.972370670247299	-1.68893	0.000169807	-0.89888	0.980187101827556	-1.56472	-3.25366	4.29945e-20
rs755587	3.1872603841e-06	1.91911678214744	0.999726878519875	-2.2618	1.6952821209e-06	2.55351259187576	0.999798238692481	-0.994657	-3.25645	4.28744e-20
rs6122773	3.1023890496e-06	2.72233387836672	0.999734149347871	-0.411722	1.6486816801e-06	1.68708187630937	0.999803783681656	-2.8453	-3.25703	4.28499e-20
rs558858881	0.00041501430961	-0.585606	0.965649005653206	-1.51999	0.00022374774724	-0.417853	0.974056628651364	-1.74088	-3.26087	4.26855e-20
rs138985858	0.00016476032881	0.887495228227082	0.986074230472149	-1.74867	8.19023190001e-05	-1.27411	0.990344692456379	-1.51628	-3.26495	4.25117e-20
rs113273913	2.688837316e-05	1.35223512168782	0.997700562087797	-2.12538	1.40934169744e-05	2.0232464598894	0.998325165667981	-1.15269	-3.27806	4.19578e-20
rs138494940	2.68201765924e-05	1.41269053568187	0.99770638074038	-2.04325	1.40579253721e-05	1.98249048511891	0.998329376374867	-1.23543	-3.27868	4.19319e-20
rs147045723	0.00033639961744	0.196888426057183	0.971973625701784	-1.76847	0.00017851364881	-0.931479	0.979192352845072	-1.51142	-3.27988	4.18815e-20
rs145327395	0.00016794086464	1.50386597938144	0.985809222021946	-1.01282	9.11249704836e-05	0.0180701952872111	0.989269118785446	-2.26715	-3.27998	4.18777e-20
rs6067027	3.1027061025e-06	2.71283885435295	0.999734122186123	-0.437468	1.6487844025e-06	1.6882130758148	0.999803771458644	-2.84336	-3.28083	4.18418e-20
rs141645934	9.42002242624e-05	-0.9029	0.991990298973198	-2.0092	5.10370217604e-05	1.60644847018905	0.993961370777831	-1.27224	-3.28144	4.18162e-20
rs41310815	2.20798491664e-05	2.49001898308548	0.998111000302922	-0.0416127	1.16297368576e-05	-0.311746	0.99861753987828	-3.24342	-3.28503	4.16664e-20
rs13045838	4.50212818441e-05	2.18877192877869	0.996155834444977	-0.394446	2.38977255609e-05	-0.285826	0.997163345712774	-2.89183	-3.28628	4.16145e-20
rs115579033	2.68557150625e-05	1.46341839934391	0.997703348526361	-1.96981	1.40745775921e-05	1.93680579804404	0.99832740075895	-1.32422	-3.29403	4.12932e-20
rs6063352	3.1873317961e-06	1.91007724148747	0.999726872402137	-2.27909	1.6953602436e-06	2.54523601062931	0.999798229396708	-1.01573	-3.29482	4.12607e-20
rs191942911	0.000154754	0.626975884244373	0.98690894076138	-1.97394	8.30170632769e-05	1.41373909741345	0.990214563342151	-1.32388	-3.29782	4.11372e-20
rs36014836	1.12985393689e-05	-1.72744	0.999032482439467	-1.9798	6.0395520025e-06	-2.14563	0.999281583756476	-1.31902	-3.29882	4.10958e-20
rs6063353	3.1877245764e-06	1.90807205027389	0.999726838753354	-2.28285	1.6955164944e-06	2.54440450956901	0.99979821080452	-1.0178	-3.30065	4.10207e-20
rs911411	3.1877959936e-06	1.90244421543149	0.999726832635171	-2.29356	1.6955946225e-06	2.54837000345582	0.999798201508105	-1.00768	-3.30124	4.09965e-20
rs116479650	2.67923217769e-05	1.40248602720565	0.997708757382361	-2.0581	1.40433815025e-05	1.97820918224393	0.998331101862927	-1.24441	-3.30251	4.09447e-20
rs141502369	0.00015085243684	-1.24436	0.987234738878976	-1.41618	7.89030699076e-05	-0.954665	0.99069497815841	-1.88715	-3.30333	4.09111e-20
rs67654540	3.1870461529e-06	1.91394386157526	0.999726896872678	-2.27174	1.6951779601e-06	2.53882902326439	0.999798251086513	-1.03207	-3.30381	4.08914e-20
rs114672235	2.67804180004e-05	1.39148363858411	0.997709773045564	-2.07366	1.40374611556e-05	1.98496260669503	0.998331804255964	-1.23125	-3.30491	4.08464e-20
rs6125551	3.1877245764e-06	1.9113877967089	0.999726838753354	-2.27652	1.6955164944e-06	2.54008847110865	0.99979821080452	-1.02877	-3.30529	4.08308e-20
rs6066775	7.38015010084e-05	0.595972659060062	0.993713868098332	-2.35823	4.02661317136e-05	1.86178997598321	0.995229688194092	-0.947808	-3.30604	4.08003e-20
rs149573521	2.67928393924e-05	1.40313706246692	0.997708713218018	-2.05718	1.40430817081e-05	1.97575925772734	0.998331137430667	-1.24925	-3.30643	4.07843e-20
rs186202473	0.00016627070916	1.28338994617902	0.985948364871918	-1.32054	8.58687635716e-05	-0.789461	0.989881827124381	-1.98824	-3.30878	4.06888e-20
rs6067025	3.1024947321e-06	2.7165079851708	0.999734140294109	-0.427544	1.6487073604e-06	1.66465475615645	0.999803780625939	-2.88287	-3.31042	4.06221e-20
rs6063355	3.1869747441e-06	1.9057365800102	0.999726902990142	-2.28742	1.6951779601e-06	2.54142	0.999798251086513	-1.02549	-3.31292	4.05207e-20
rs11696870	3.1871889729e-06	1.90140426938222	0.999726884637545	-2.29563	1.6953081616e-06	2.54409234739332	0.999798235593914	-1.01865	-3.31429	4.04651e-20
rs73113998	8.40656098129e-05	1.63674794655312	0.992845864804499	-1.14014	4.54212646209e-05	0.937706338572571	0.994622246088254	-2.17546	-3.3156	4.04119e-20
rs117868382	8.01569252416e-05	0.244406369233244	0.993176231087594	-2.46401	4.23941627664e-05	1.89966948647536	0.994978847111634	-0.851736	-3.31574	4.04062e-20
rs139298051	0.00014295789225	1.55285409609836	0.987894695071462	-1.01597	7.59822535684e-05	0.338701905979043	0.991036341849745	-2.30044	-3.31642	4.03791e-20
rs34778847	3.1879388304e-06	1.93377131079598	0.9997268203986	-2.23347	1.6956727524e-06	2.51856118201785	0.999798192211476	-1.08316	-3.31663	4.03705e-20
rs6012564	3.1895459649e-06	-1.90215	0.999726682718302	-2.29385	1.6963239049e-06	-2.5421	0.999798114731245	-1.02342	-3.31727	4.03446e-20
rs6019570	3.1803372225e-06	-2.00988	0.999727471615073	-2.08462	1.6919765776e-06	-2.45858	0.999798632017245	-1.23349	-3.31812	4.03104e-20
rs6012575	3.1802302224e-06	-1.99294	0.999727480781591	-2.11854	1.6919245476e-06	-2.4721	0.999798638208268	-1.20018	-3.31872	4.02864e-20
rs116575164	2.67803145009e-05	1.38876747111577	0.997709781876438	-2.07743	1.40373112896e-05	1.97970981999872	0.998331822036157	-1.24166	-3.31908	4.02717e-20
rs193202827	0.000274863	1.02312564087098	0.976982384022322	-1.3744	0.00014115340864	-0.465035	0.983475121201782	-1.9451	-3.3195	4.02546e-20
rs150944682	2.76127128484e-05	-0.414661	0.997638764324212	-2.93852	1.453515625e-05	2.36683016393443	0.998272760901617	-0.384511	-3.32303	4.0113e-20
rs3092720	3.1875103296e-06	-1.9014	0.999726857107493	-2.29558	1.6953342025e-06	-2.54059	0.999798232495323	-1.02756	-3.32314	4.01084e-20
rs73113975	8.44658416809e-05	1.5307060637417	0.992812049174692	-1.30456	4.59864365689e-05	1.08510130018743	0.994555695574921	-2.02108	-3.32564	4.00083e-20
rs6063354	3.1879388304e-06	1.89368125098013	0.9997268203986	-2.31017	1.6956467089e-06	2.54496724698004	0.999798195310377	-1.01633	-3.3265	3.99741e-20
rs6125552	3.1875817444e-06	1.89713674399848	0.999726850989515	-2.30367	1.69546441e-06	2.54240073727056	0.999798217002012	-1.02291	-3.32658	3.99706e-20
rs143484644	0.00033921904041	0.233231258721135	0.971745368684608	-1.75682	0.00018558340441	0.840078103781133	0.978386109344907	-1.57197	-3.32879	3.98825e-20
rs149634823	0.00016830651289	1.36757802563727	0.985778764625365	-1.20467	8.95814925625e-05	0.542427428088434	0.989448961067629	-2.1302	-3.33488	3.96405e-20
rs181718416	8.44426831329e-05	0.275375519491755	0.992814005779899	-2.43017	4.58660790025e-05	1.85063012646827	0.994569867254957	-0.904779	-3.33495	3.96378e-20
rs479800	3.44436350769e-05	0.742803981004861	0.99705635367688	-2.63899	1.809821764e-05	2.18135724695595	0.997850266033475	-0.69716	-3.33615	3.95902e-20
rs145929774	0.00010405632064	-1.32837	0.991159658806601	-1.48974	5.43505123984e-05	1.16701617410082	0.993571843330927	-1.84695	-3.33668	3.95689e-20
rs113338452	0.00011761185601	0.198900865844775	0.990019511436534	-2.28398	6.28874376256e-05	-1.67704	0.992569664359977	-1.05531	-3.33929	3.94661e-20
rs17632	3.1871532676e-06	1.88766342157445	0.999726887696354	-2.32166	1.695204e-06	2.54381720430108	0.99979824798804	-1.01939	-3.34105	3.93966e-20
rs730543	3.1873317961e-06	-1.87128	0.999726872402137	-2.35241	1.6952560804e-06	-2.55564	0.999798241791025	-0.98924	-3.34165	3.93728e-20
rs6125543	3.1866891169e-06	1.89773293821738	0.999726927459315	-2.30268	1.69494361e-06	2.53514094784546	0.999798278971692	-1.04149	-3.34417	3.92737e-20
rs71351958	3.1868676324e-06	1.8934505203957	0.99972691216621	-2.31077	1.6950477636e-06	2.53802018526199	0.999798266578516	-1.03416	-3.34493	3.9244e-20
rs1393948	5.8162004224e-06	2.34050537384728	0.999501712663414	-1.06455	3.1009096836e-06	1.82822242665849	0.999631011889374	-2.28179	-3.34634	3.91887e-20
rs555731085	0.00045745509924	0.460178509645505	0.96226869934058	-1.53675	0.00023086371364	0.00450417922628371	0.973253606267682	-1.81067	-3.34741	3.91466e-20
rs6125540	3.1508380036e-06	1.99829301544737	0.999729998769674	-2.11249	1.6757043601e-06	2.45990312787275	0.999800568243891	-1.23506	-3.34755	3.91411e-20
rs73266241	3.1884744969e-06	1.87462128212452	0.999726774509018	-2.34598	1.6959071529e-06	2.55050795917897	0.999798164320305	-1.00214	-3.34812	3.91189e-20
rs6125611	3.1045382809e-06	2.70412663098691	0.999733965224434	-0.460764	1.6498118025e-06	1.6598388415275	0.999803649207598	-2.89054	-3.35131	3.89946e-20
rs2295714	3.1870818576e-06	1.89989	0.999726893813921	-2.29853	1.6952300401e-06	2.5291971643843	0.999798244889545	-1.05645	-3.35498	3.88515e-20
rs182341367	0.000174821	-1.33271	0.985236419149942	-1.23285	9.13574667721e-05	0.531606143892464	0.98924203455046	-2.12627	-3.35912	3.8691e-20
rs6063351	3.1508735049e-06	1.99609592861127	0.999729995728322	-2.11687	1.67573025e-06	2.45643105446118	0.999800565163253	-1.24359	-3.36046	3.86392e-20
rs3818262	3.1869747441e-06	1.90351275200117	0.999726902990142	-2.29166	1.6951519204e-06	2.52419392002949	0.999798254184961	-1.06912	-3.36077	3.86272e-20
rs181434368	0.00037433736484	0.441834213709052	0.968911190297867	-1.64088	0.00020555243641	0.546973237265556	0.976115971417742	-1.72126	-3.36214	3.85746e-20
rs182483004	0.00033819577801	0.488994622106459	0.971828198355527	-1.66853	0.00018932384025	0.661240597405429	0.977960082318556	-1.69365	-3.36218	3.8573e-20
rs11696929	3.18836736e-06	1.86946124551971	0.999726783687243	-2.35566	1.6958550625e-06	2.54799769629487	0.99979817051851	-1.00855	-3.36421	3.84946e-20
rs1022687	3.1876888681e-06	-1.8976	0.99972684181242	-2.30278	1.6954904521e-06	-2.52586	0.999798213903278	-1.06481	-3.36759	3.83648e-20
rs78449595	5.36906442121e-05	-0.512446	0.99541898747194	-2.56222	2.95081449796e-05	2.0143626637016	0.996499721304236	-0.805729	-3.36795	3.8351e-20
rs2252259	3.1879745401e-06	-1.8997	0.999726817339414	-2.29875	1.6956206656e-06	-2.52394	0.999798198409253	-1.06963	-3.36838	3.83344e-20
rs117140207	0.00016133318289	1.08243778391869	0.986359946482908	-1.56953	8.31364651264e-05	-1.01727	0.990200627054723	-1.80037	-3.3699	3.82763e-20
rs3092039	3.1870461529e-06	-1.90214	0.999726896872678	-2.29425	1.695204e-06	-2.52059	0.99979824798804	-1.07819	-3.37244	3.81791e-20
rs2064853	3.1874746225e-06	-1.8868	0.999726860166456	-2.32324	1.6954123264e-06	-2.53138	0.999798223199408	-1.05088	-3.37412	3.81151e-20
rs145274545	0.00010513426225	1.41173257911933	0.991068897728674	-1.37151	5.41488467881e-05	1.02539073382265	0.993595542018166	-2.00303	-3.37455	3.80987e-20
rs6066982	3.1907962384e-06	1.9047517746378	0.999726575609666	-2.2887	1.6973138961e-06	2.51623797790929	0.999797996932831	-1.08853	-3.37723	3.79968e-20
rs79745695	5.49657649321e-05	-0.768814	0.995310701339936	-2.38708	3.02066755236e-05	1.91309774638559	0.996417157952674	-0.992384	-3.37947	3.79117e-20
rs188888108	0.00013085529664	0.571124729002028	0.988908144479139	-2.08949	7.01160046609e-05	1.49355170400058	0.991722657396645	-1.291	-3.38049	3.7873e-20
rs3091866	3.1875103296e-06	-1.89188	0.999726857107493	-2.31364	1.6953602436e-06	-2.52423	0.999798229396708	-1.06896	-3.3826	3.77932e-20
rs7272164	3.19086769e-06	1.90306779376365	0.999726569488539	-2.29189	1.6973399524e-06	2.51512872077493	0.999797993832409	-1.09131	-3.3832	3.77704e-20
rs2426106	3.1874389156e-06	-1.8894	0.999726863225402	-2.31833	1.6953342025e-06	-2.52529	0.999798232495323	-1.06628	-3.38462	3.77171e-20
rs3795081	3.1870461529e-06	1.89094402401931	0.999726896872678	-2.31548	1.6951779601e-06	2.52356008878716	0.999798251086513	-1.07071	-3.38619	3.76576e-20
rs2426108	3.1883316481e-06	-1.88804	0.999726786746616	-2.32077	1.6958290176e-06	-2.52514	0.999798173617576	-1.06653	-3.3873	3.7616e-20
rs6019537	3.1891530724e-06	-1.9128	0.999726716376687	-2.27361	1.6961936644e-06	-2.50551	0.99979813022848	-1.1158	-3.3894	3.75369e-20
rs13039993	3.1869747441e-06	1.88611	0.999726902990142	-2.32461	1.6950998416e-06	2.52486251497742	0.999798260381786	-1.06744	-3.39206	3.74374e-20
rs7265500	3.18872449e-06	1.89383435067481	0.999726753092562	-2.30975	1.6961155225e-06	2.51747994010827	0.999798139526536	-1.08575	-3.39551	3.73085e-20
rs145522894	0.00010249132644	1.49801457950572	0.991291458578288	-1.25947	5.32977382809e-05	0.890973669034988	0.993695572291386	-2.13884	-3.39831	3.72041e-20
rs62211374	6.2196369664e-06	2.91203005709886	0.999467167738453	0.469048394689967	3.3087246201e-06	0.321354158076735	0.99960629299761	-3.86834	-3.39929	3.71676e-20
rs182193263	0.00036015309729	0.062311555141034	0.970053920499006	-1.7523	0.00019196656704	-0.715134	0.977659305425737	-1.65068	-3.40297	3.7031e-20
rs6066977	3.1910820496e-06	1.88529747643252	0.999726551124748	-2.32551	1.6974702369e-06	2.52046635504694	0.999797978329943	-1.07783	-3.40334	3.70172e-20
rs77153852	0.00016672232641	0.125171738137096	0.985910736170327	-2.12345	8.81005627161e-05	1.42381520084294	0.989621576878611	-1.28091	-3.40436	3.69798e-20
rs117107707	5.17235694481e-05	-0.482987	0.995586082123127	-2.59537	2.84800466889e-05	2.02043596474955	0.996621263058914	-0.810942	-3.40632	3.69074e-20
rs2426147	5.7984158401e-06	2.36312858442103	0.999503235552802	-1.0129	3.0896499076e-06	1.76707590428619	0.999632351236991	-2.39349	-3.40638	3.69049e-20
rs10432730	3.19086769e-06	1.88290880591166	0.999726569488539	-2.33004	1.6973660089e-06	2.52060514418612	0.999797990731963	-1.07752	-3.40756	3.68616e-20
rs73130163	9.11360441104e-05	1.38576151309587	0.992248822014363	-1.47723	4.97002440256e-05	1.13187675181281	0.994118606220088	-1.93118	-3.40841	3.68303e-20
rs148036994	0.00016167885409	-1.37883	0.986331120886221	-1.20872	8.73000579025e-05	-0.422894	0.989714908057194	-2.20003	-3.40875	3.68178e-20
rs3092374	3.1882959364e-06	-1.91845	0.999726789805973	-2.26291	1.6960113361e-06	-2.49342	0.999798151923611	-1.14606	-3.40897	3.68095e-20
rs185733401	0.00024707438596	-0.881459	0.979261219048776	-1.55745	0.00013849759225	0.651030292730594	0.983780995783346	-1.8523	-3.40975	3.67809e-20
rs142265530	6.04556011024e-05	-1.91474	0.994844760992713	-0.81021	3.26534530624e-05	0.594984180094919	0.996128067070784	-2.60068	-3.41089	3.67388e-20
rs3092302	3.1880816704e-06	-1.89277	0.999726808161754	-2.31187	1.6957508841e-06	-2.51183	0.999798182914633	-1.10007	-3.41193	3.67007e-20
rs932451	3.1789820209e-06	-1.99629	0.999727587712917	-2.11206	1.69130025e-06	-2.43107	0.999798712493129	-1.30093	-3.41298	3.66621e-20
rs6125577	3.1951205001e-06	1.88016716177433	0.999726205158278	-2.33454	1.6996597641e-06	2.51936396898083	0.999797717799621	-1.07997	-3.4145	3.66065e-20
rs76635436	8.87980174929e-05	1.79123595100215	0.992446170567812	-0.850706	4.44674251921e-05	0.343268765024241	0.994734583442476	-2.56469	-3.4154	3.65738e-20
rs186923572	0.00011485194561	1.65525478449925	0.990251433016154	-0.958738	6.19307615521e-05	0.0443856811201572	0.992681871252591	-2.45772	-3.41646	3.65349e-20
rs535587554	0.00025460670096	0.00573559198816776	0.978642479271613	-1.92316	0.00014284552324	1.05932997540119	0.983280336861034	-1.49388	-3.41704	3.65139e-20
rs67524316	1.12225e-05	-0.574197	0.99903898759214	-3.30907	5.9436489616e-06	2.65236919391623	0.999292983540785	-0.112184	-3.42125	3.63602e-20
rs6125571	3.1934404804e-06	1.88926257120793	0.999726349082382	-2.31766	1.6987733569e-06	2.50975548002486	0.999797823272582	-1.10438	-3.42205	3.63314e-20
rs148852205	0.00029275894404	-0.236623	0.975520446483094	-1.82765	0.00015060689284	-0.929157	0.982387890229712	-1.59552	-3.42317	3.62906e-20
rs142433575	8.86250905281e-05	1.79148489126405	0.9924607701347	-0.851207	4.43619938304e-05	0.324680803785913	0.994747002058704	-2.57205	-3.42325	3.62876e-20
rs4810900	3.1794812721e-06	-1.98078	0.999727544942902	-2.14281	1.6915083364e-06	-2.43877	0.999798687733031	-1.28212	-3.42492	3.6227e-20
rs73115812	8.56374414025e-05	1.67245692426559	0.992713073838736	-1.07247	4.63059835225e-05	0.707692307692308	0.99451807200474	-2.35411	-3.42658	3.6167e-20
rs6125536	3.1897602801e-06	1.86336989568811	0.999726664358311	-2.36681	1.6965844009e-06	2.52675946043469	0.999798083734992	-1.06222	-3.42902	3.60788e-20
rs2075679	3.1530749761e-06	1.9711267169382	0.999729807131089	-2.16604	1.6768437049e-06	2.44794699327377	0.999800432673326	-1.26406	-3.4301	3.60401e-20
rs1847326	1.122585025e-05	-0.574502	0.999038700977144	-3.30874	5.9456970244e-06	2.64829107850294	0.99929274008933	-0.122814	-3.43156	3.59874e-20
rs2295028	3.1792316416e-06	-1.98597	0.999727566328329	-2.13255	1.6914042916e-06	-2.43126	0.99979870011327	-1.30044	-3.43299	3.59359e-20
rs6063348	3.1875103296e-06	1.875	0.999726857107493	-2.34543	1.69546441e-06	2.5168036249136	0.999798217002012	-1.08765	-3.43307	3.5933e-20
[truncated: 1,917 more rows]

## Sheet: Table S3
Table S3. The locus gene PTPRS of rs2602713 was shown to be in the 1 MB range between RA and HGSL by colocalization
[truncated: 3,435 more rows]

[truncated: 39 more sheets: Table S4, Table S5, Table S6, Table S7, Table S8, Table S9, Table S10, Table S11, Table S12, Table S13, Table S14, Table S15, Table S16, Table S17, Table S18, Table S19, Table S20, Table S21, Table S22, Table S23 …]
